# Supplementary material for: Glycolytic and lipid oxidative metabolic programs are essential for freshly-isolated regulatory T cells in mice with sepsis
Source: Royal Society of Chemistry journal article supplement (doi:10.1039/d0ra01947j), 2020-01-01
Supplement: d0ra01947j3.pdf [file d0ra01947j3.pdf]

## **Glycolytic and Lipid Oxidative Metabolic Programs Are Essential for Freshly-Isolated Regulatory T Cell in Sepsis Mice**

*Xiaomei Zhu, WenQing Ji, Shubin Guo, \*, Di Zhu, Yue Yang, Xin Liu*

Beijing Key Laboratory of Cardiopulmonary-Cerebral Resuscitation, Emergency  
Department, Chao-Yang Hospital, Capital Medical University, Chaoyang District,  
Beijing 100020, China

*\* To whom correspondence should be addressed.*

*Email:* shubinguo@126.com

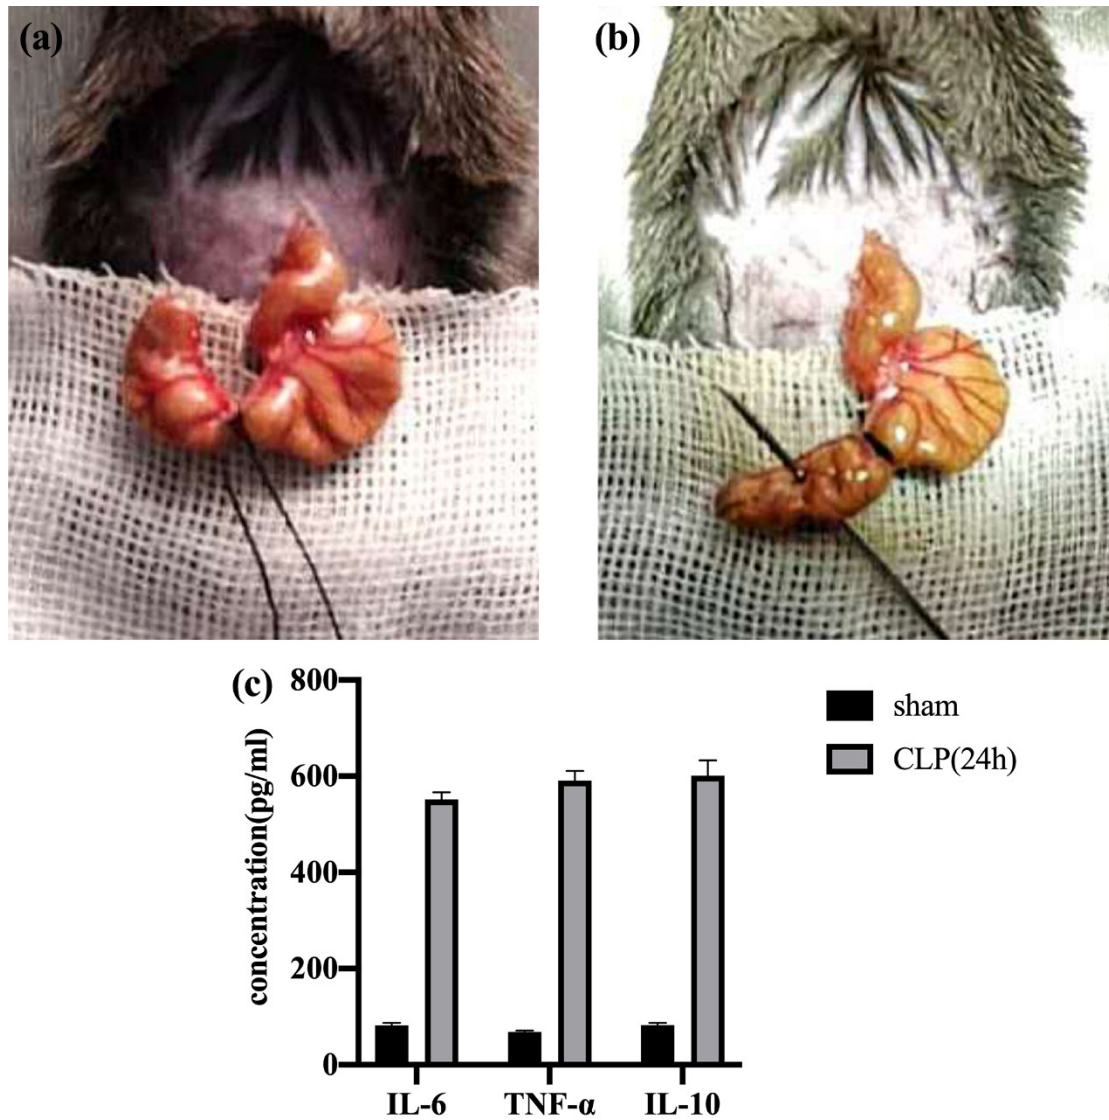

**Fig. S1** (a) Ligation of the cecum at moderate position. (b) Cecal puncture ('through-and-through') using No. 4 needle. (c) Comparison of pro-inflammatory and anti-inflammatory factors between the two groups.

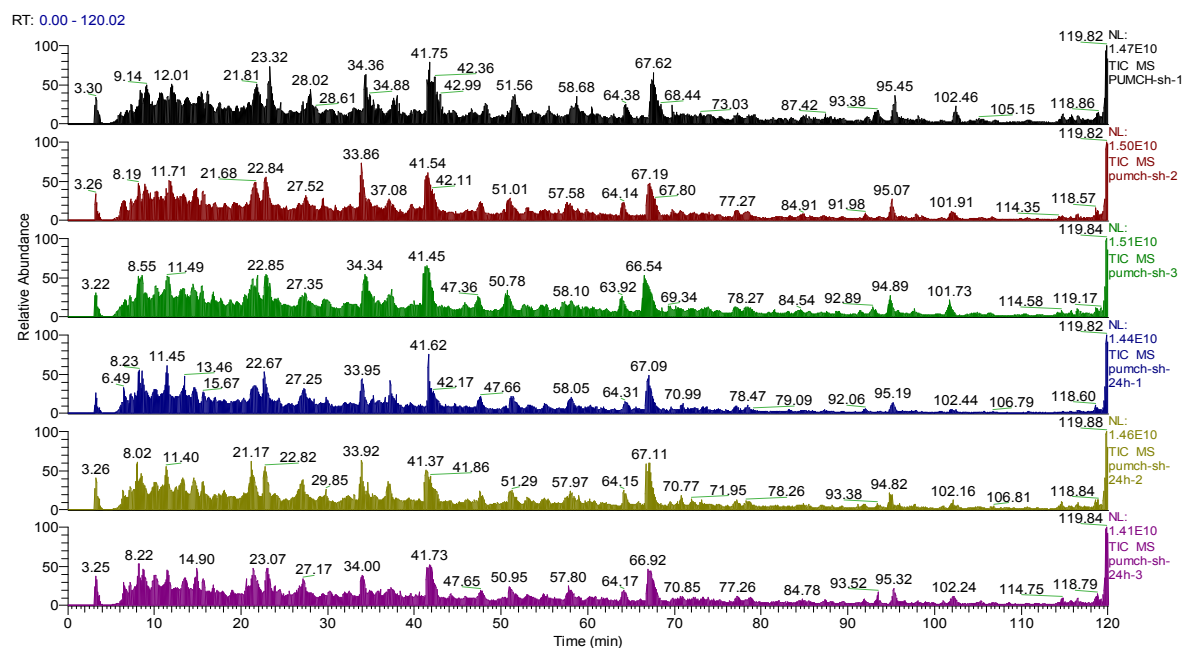

**Fig. S2 The total ion chromatogram (TIC)**

Three parallel samples were set in CLP group and sham group respectively. This figure shows the TIC of these 6 samples. We can see that the consistency of these 6 samples is very high, indicating that the mass spectrometry quantitative results are relatively accurate.
