# Supplementary material for: Glycolytic and lipid oxidative metabolic programs are essential for freshly-isolated regulatory T cells in mice with sepsis
Source: RSC Adv. 2020 Jun 3;10(35):21000–8. doi: 10.1039/d0ra01947j (PMC9054272; doi:10.1039/d0ra01947j)
Supplement: RA-010-D0RA01947J-s001 [file RA-010-D0RA01947J-s001.xlsx]

## Sheet: Sheet1
							MS/MS Count						iBAQ Intensity
Protein IDs	Majority protein IDs	Fasta headers	Unique peptides	Sequence coverage [%]	Mol. weight [kDa]	Score	MS/MS Count 24H-1	MS/MS Count 24H-2	MS/MS Count 24H-3	MS/MS Count sham-1	MS/MS Count sham-2	MS/MS Count sham-3	24H-1	24H-2	24H-3	sham-1	sham-2	sham-3
tr|E9QAS4|E9QAS4_MOUSE	tr|E9QAS4|E9QAS4_MOUSE;tr|E9PYU4|E9PYU4_MOUSE;sp|Q6PDQ2|CHD4_MOUSE;tr|E9QAS5|E9QAS5_MOUSE;sp|A2A8L1|CHD5_MOUSE;tr|E9PYL1|E9PYL1_MOUSE	>tr|E9QAS4|E9QAS4_MOUSE Chromodomain-helicase-DNA-binding protein 4 OS=Mus musculus OX=10090 GN=Chd4 PE=1 SV=1;>tr|E9PYU4|E9PYU4_MOUSE Chromodomain-helicase-DNA-binding protein 5 OS=Mus musculus OX=10090 GN=Chd5 PE=1 SV=1;>sp|Q6PDQ2|CHD4_MOUSE Chromodomain	3	2	216.37	9.9004	2	2	4	2	2	1	175510	176020	256050	188050	154650	163890
sp|A2AB59|RHG27_MOUSE	sp|A2AB59|RHG27_MOUSE	>sp|A2AB59|RHG27_MOUSE Rho GTPase-activating protein 27 OS=Mus musculus OX=10090 GN=Arhgap27 PE=1 SV=1	3	4.4	97.047	4.9308	1	0	1	0	0	1	195190	0	296460	0	0	0
sp|A2ADY9|DDI2_MOUSE	sp|A2ADY9|DDI2_MOUSE	>sp|A2ADY9|DDI2_MOUSE Protein DDI1 homolog 2 OS=Mus musculus OX=10090 GN=Ddi2 PE=1 SV=1	5	21.3	44.59	31.163	4	4	9	10	9	6	5711800	3938900	6273100	6474400	4829700	6027600
tr|R4GML3|R4GML3_MOUSE	tr|R4GML3|R4GML3_MOUSE;sp|A2AL36|CNTRL_MOUSE;tr|A0A0J9YTY9|A0A0J9YTY9_MOUSE;tr|A2AS42|A2AS42_MOUSE;tr|F6QP53|F6QP53_MOUSE;tr|R4GML4|R4GML4_MOUSE;tr|E9Q9E7|E9Q9E7_MOUSE	>tr|R4GML3|R4GML3_MOUSE Centriolin OS=Mus musculus OX=10090 GN=Cntrl PE=1 SV=2;>sp|A2AL36|CNTRL_MOUSE Centriolin OS=Mus musculus OX=10090 GN=Cntrl PE=1 SV=2;>tr|A0A0J9YTY9|A0A0J9YTY9_MOUSE Centriolin (Fragment) OS=Mus musculus OX=10090 GN=Cntrl PE=1 SV=1;>	2	1.1	268.75	2.7031	0	0	0	0	1	0	45641	92733	44390	129220	82976	198430
sp|A2AQ19|RTF1_MOUSE	sp|A2AQ19|RTF1_MOUSE	>sp|A2AQ19|RTF1_MOUSE RNA polymerase-associated protein RTF1 homolog OS=Mus musculus OX=10090 GN=Rtf1 PE=1 SV=1	7	11.2	80.796	23.79	9	8	5	9	8	7	2929500	3464800	2784500	3446100	3817200	3009900
sp|A2AR02|PPIG_MOUSE	sp|A2AR02|PPIG_MOUSE;tr|A2AR01|A2AR01_MOUSE	>sp|A2AR02|PPIG_MOUSE Peptidyl-prolyl cis-trans isomerase G OS=Mus musculus OX=10090 GN=Ppig PE=1 SV=1;>tr|A2AR01|A2AR01_MOUSE Peptidyl-prolyl cis-trans isomerase (Fragment) OS=Mus musculus OX=10090 GN=Ppig PE=1 SV=1	2	4	88.324	3.3854	0	0	0	0	3	1	289000	376950	618430	1016300	2299300	904280
tr|E9Q8N1|E9Q8N1_MOUSE	tr|E9Q8N1|E9Q8N1_MOUSE;tr|E9Q8K5|E9Q8K5_MOUSE;sp|A2ASS6|TITIN_MOUSE;tr|A2AT70|A2AT70_MOUSE;tr|F7CR78|F7CR78_MOUSE	>tr|E9Q8N1|E9Q8N1_MOUSE Titin OS=Mus musculus OX=10090 GN=Ttn PE=1 SV=1;>tr|E9Q8K5|E9Q8K5_MOUSE Titin OS=Mus musculus OX=10090 GN=Ttn PE=1 SV=1;>sp|A2ASS6|TITIN_MOUSE Titin OS=Mus musculus OX=10090 GN=Ttn PE=1 SV=1;>tr|A2AT70|A2AT70_MOUSE Titin (Fragment)	3	0.1	3716	5.44	2	1	1	2	1	1	10895	22865	23579	24896	4831	5042.5
sp|A2AWA9|RBGP1_MOUSE	sp|A2AWA9|RBGP1_MOUSE	>sp|A2AWA9|RBGP1_MOUSE Rab GTPase-activating protein 1 OS=Mus musculus OX=10090 GN=Rabgap1 PE=1 SV=1	1	0.9	120.8	2.6878	1	1	0	0	0	2	44218	0	33759	0	66243	0
sp|A2BDX3|MOCS3_MOUSE	sp|A2BDX3|MOCS3_MOUSE	>sp|A2BDX3|MOCS3_MOUSE Adenylyltransferase and sulfurtransferase MOCS3 OS=Mus musculus OX=10090 GN=Mocs3 PE=1 SV=1	1	2	49.374	3.0171	1	0	0	0	2	1	9889800	0	0	309790	15573000	11642000
sp|A2BE28|LAS1L_MOUSE	sp|A2BE28|LAS1L_MOUSE	>sp|A2BE28|LAS1L_MOUSE Ribosomal biogenesis protein LAS1L OS=Mus musculus OX=10090 GN=Las1l PE=1 SV=1	6	12.1	89.413	19.269	2	4	3	6	3	6	1305200	755560	1285800	1352500	1384600	1452400
tr|Z4YL44|Z4YL44_MOUSE	tr|Z4YL44|Z4YL44_MOUSE;tr|Z4YMH1|Z4YMH1_MOUSE;sp|A2CG63|ARI4B_MOUSE;tr|A0A1Y7VIX3|A0A1Y7VIX3_MOUSE	>tr|Z4YL44|Z4YL44_MOUSE AT-rich interactive domain-containing protein 4B OS=Mus musculus OX=10090 GN=Arid4b PE=1 SV=1;>tr|Z4YMH1|Z4YMH1_MOUSE AT-rich interactive domain-containing protein 4B (Fragment) OS=Mus musculus OX=10090 GN=Arid4b PE=1 SV=1;>sp|A2CG6	2	6.6	53.924	3.4265	0	0	0	1	0	1	1966200	413380	137330	419030	204100	197170
tr|S4R1M5|S4R1M5_MOUSE	tr|S4R1M5|S4R1M5_MOUSE;sp|A2RTL5|RSRC2_MOUSE;tr|S4R265|S4R265_MOUSE;tr|S4R2L4|S4R2L4_MOUSE;tr|S4R1N9|S4R1N9_MOUSE	>tr|S4R1M5|S4R1M5_MOUSE Arginine/serine-rich coiled-coil protein 2 OS=Mus musculus OX=10090 GN=Rsrc2 PE=1 SV=1;>sp|A2RTL5|RSRC2_MOUSE Arginine/serine-rich coiled-coil protein 2 OS=Mus musculus OX=10090 GN=Rsrc2 PE=2 SV=1;>tr|S4R265|S4R265_MOUSE Arginine/se	2	15.8	22.514	5.5796	1	1	1	4	1	1	1405000	1999000	2024700	19863000	2309800	2653900
sp|A3KMP2|TTC38_MOUSE	sp|A3KMP2|TTC38_MOUSE	>sp|A3KMP2|TTC38_MOUSE Tetratricopeptide repeat protein 38 OS=Mus musculus OX=10090 GN=Ttc38 PE=1 SV=2	7	17.2	52.223	24.689	4	8	10	8	6	6	2058500	4284100	3958600	4506300	5604700	4075800
sp|A6H5Y3|METH_MOUSE	sp|A6H5Y3|METH_MOUSE	>sp|A6H5Y3|METH_MOUSE Methionine synthase OS=Mus musculus OX=10090 GN=Mtr PE=1 SV=1	2	1.5	139.07	2.7571	1	0	0	0	0	0	76055	79628	88577	124060	114760	204610
sp|A6H630|ARMT1_MOUSE	sp|A6H630|ARMT1_MOUSE;tr|D6RG65|D6RG65_MOUSE	>sp|A6H630|ARMT1_MOUSE Protein-glutamate O-methyltransferase OS=Mus musculus OX=10090 GN=Armt1 PE=1 SV=1;>tr|D6RG65|D6RG65_MOUSE Protein-glutamate O-methyltransferase OS=Mus musculus OX=10090 GN=Armt1 PE=1 SV=1	2	6.2	50.548	5.1952	1	0	0	0	0	0	372110	0	208450	365000	201390	0
tr|H3BJD4|H3BJD4_MOUSE	tr|H3BJD4|H3BJD4_MOUSE;tr|I1E4X0|I1E4X0_MOUSE;tr|F6YMR0|F6YMR0_MOUSE;tr|E9PUF2|E9PUF2_MOUSE;tr|B7ZNS2|B7ZNS2_MOUSE;sp|B1AZP2|DLGP4_MOUSE	>tr|H3BJD4|H3BJD4_MOUSE Disks large-associated protein 4 (Fragment) OS=Mus musculus OX=10090 GN=Dlgap4 PE=1 SV=8;>tr|I1E4X0|I1E4X0_MOUSE Disks large-associated protein 4 OS=Mus musculus OX=10090 GN=Dlgap4 PE=1 SV=1;>tr|F6YMR0|F6YMR0_MOUSE Disks large-assoc	2	23.9	12.448	3.8626	1	1	0	0	2	1	391400	0	648350	0	794630	790980
tr|E9QAI5|E9QAI5_MOUSE	tr|E9QAI5|E9QAI5_MOUSE;sp|B2RQC6|PYR1_MOUSE;tr|G3UWN2|G3UWN2_MOUSE	>tr|E9QAI5|E9QAI5_MOUSE CAD protein OS=Mus musculus OX=10090 GN=Cad PE=1 SV=1;>sp|B2RQC6|PYR1_MOUSE CAD protein OS=Mus musculus OX=10090 GN=Cad PE=1 SV=1;>tr|G3UWN2|G3UWN2_MOUSE CAD protein OS=Mus musculus OX=10090 GN=Cad PE=1 SV=1	11	6.9	236.25	25.863	7	8	10	6	5	10	718660	866160	641660	853670	659330	484750
sp|B2RXR6|ANR44_MOUSE	sp|B2RXR6|ANR44_MOUSE;tr|E9QNQ2|E9QNQ2_MOUSE;tr|J3QK13|J3QK13_MOUSE	>sp|B2RXR6|ANR44_MOUSE Serine/threonine-protein phosphatase 6 regulatory ankyrin repeat subunit B OS=Mus musculus OX=10090 GN=Ankrd44 PE=1 SV=1;>tr|E9QNQ2|E9QNQ2_MOUSE Serine/threonine-protein phosphatase 6 regulatory ankyrin repeat subunit B OS=Mus muscul	14	18.4	107.38	44.233	17	12	11	15	13	13	3697700	4041500	3715600	4198800	4008900	5158800
sp|B2RY56|RBM25_MOUSE	sp|B2RY56|RBM25_MOUSE;tr|S4R2B0|S4R2B0_MOUSE	>sp|B2RY56|RBM25_MOUSE RNA-binding protein 25 OS=Mus musculus OX=10090 GN=Rbm25 PE=1 SV=2;>tr|S4R2B0|S4R2B0_MOUSE RNA-binding protein 25 (Fragment) OS=Mus musculus OX=10090 GN=Rbm25 PE=1 SV=1	12	18.6	99.551	73.945	10	10	18	14	17	11	8065300	8083300	9579800	11734000	15366000	11279000
sp|C0HKD9|MFA1B_MOUSE	sp|C0HKD9|MFA1B_MOUSE;sp|C0HKD8|MFA1A_MOUSE	>sp|C0HKD9|MFA1B_MOUSE Microfibrillar-associated protein 1B OS=Mus musculus OX=10090 GN=Mfap1b PE=1 SV=1;>sp|C0HKD8|MFA1A_MOUSE Microfibrillar-associated protein 1A OS=Mus musculus OX=10090 GN=Mfap1a PE=1 SV=1	7	18.2	51.954	46.028	5	9	7	14	14	13	8802900	10097000	10222000	12249000	12579000	14656000
tr|A0A0N4SV66|A0A0N4SV66_MOUSE	tr|A0A0N4SV66|A0A0N4SV66_MOUSE;sp|Q8CGP6|H2A1H_MOUSE;tr|Q8CGP4|Q8CGP4_MOUSE;sp|Q8R1M2|H2AJ_MOUSE;sp|Q8CGP7|H2A1K_MOUSE;sp|Q8CGP5|H2A1F_MOUSE;sp|Q8BFU2|H2A3_MOUSE;sp|C0HKE9|H2A1P_MOUSE;sp|C0HKE8|H2A1O_MOUSE;sp|C0HKE7|H2A1N_MOUSE;sp|C0HKE6|H2A1I_MOUSE;sp|C0HKE5|H2A1G_MOUSE;sp|C0HKE4|H2A1E_MOUSE;sp|C0HKE3|H2A1D_MOUSE;sp|C0HKE2|H2A1C_MOUSE;sp|C0HKE1|H2A1B_MOUSE;sp|P27661|H2AX_MOUSE	>tr|A0A0N4SV66|A0A0N4SV66_MOUSE Histone H2A OS=Mus musculus OX=10090 GN=H2afj PE=1 SV=1;>sp|Q8CGP6|H2A1H_MOUSE Histone H2A type 1-H OS=Mus musculus OX=10090 GN=Hist1h2ah PE=1 SV=3;>tr|Q8CGP4|Q8CGP4_MOUSE Histone H2A OS=Mus musculus OX=10090 GN=Hist1h2aa PE	1	36.5	13.66	77.7	6	7	6	6	5	5	159770000	196800000	291960000	105870000	100320000	136630000
tr|A0A338P7E3|A0A338P7E3_MOUSE	tr|A0A338P7E3|A0A338P7E3_MOUSE;tr|A0A338P711|A0A338P711_MOUSE;sp|C0HKG6|RNT2B_MOUSE;sp|C0HKG5|RNT2A_MOUSE	>tr|A0A338P7E3|A0A338P7E3_MOUSE Ribonuclease T2-B OS=Mus musculus OX=10090 GN=Rnaset2b PE=1 SV=1;>tr|A0A338P711|A0A338P711_MOUSE Ribonuclease T2-B (Fragment) OS=Mus musculus OX=10090 GN=Rnaset2b PE=1 SV=1;>sp|C0HKG6|RNT2B_MOUSE Ribonuclease T2-B OS=Mus mus	3	20.9	18.783	27.836	3	3	2	4	3	4	2955900	2086900	2924700	6120300	5043500	5594300
sp|D3YXK2|SAFB1_MOUSE	sp|D3YXK2|SAFB1_MOUSE;tr|S4R1M2|S4R1M2_MOUSE	>sp|D3YXK2|SAFB1_MOUSE Scaffold attachment factor B1 OS=Mus musculus OX=10090 GN=Safb PE=1 SV=2;>tr|S4R1M2|S4R1M2_MOUSE Scaffold attachment factor B1 OS=Mus musculus OX=10090 GN=Safb PE=1 SV=1	11	22.4	105.1	247.84	15	18	14	20	25	21	9004100	11674000	12886000	17527000	13580000	13880000
sp|D3Z4I3|RBM24_MOUSE	sp|D3Z4I3|RBM24_MOUSE;sp|Q62176|RBM38_MOUSE;tr|G3UXG4|G3UXG4_MOUSE;tr|G3UWX7|G3UWX7_MOUSE	>sp|D3Z4I3|RBM24_MOUSE RNA-binding protein 24 OS=Mus musculus OX=10090 GN=Rbm24 PE=1 SV=1;>sp|Q62176|RBM38_MOUSE RNA-binding protein 38 OS=Mus musculus OX=10090 GN=Rbm38 PE=1 SV=2;>tr|G3UXG4|G3UXG4_MOUSE RNA-binding protein 38 (Fragment) OS=Mus musculus OX	4	16.9	24.822	13.406	2	3	1	3	2	2	4376300	8237100	4686700	9196100	8063400	7010000
sp|D3Z7P3|GLSK_MOUSE	sp|D3Z7P3|GLSK_MOUSE;tr|D3Z7P4|D3Z7P4_MOUSE	>sp|D3Z7P3|GLSK_MOUSE Glutaminase kidney isoform, mitochondrial OS=Mus musculus OX=10090 GN=Gls PE=1 SV=1;>tr|D3Z7P4|D3Z7P4_MOUSE Glutaminase kidney isoform, mitochondrial OS=Mus musculus OX=10090 GN=Gls PE=1 SV=1	6	13.9	73.963	40.432	5	5	5	8	6	8	2740900	3856800	3720000	4796600	4009400	4427100
sp|E9PV24|FIBA_MOUSE	sp|E9PV24|FIBA_MOUSE	>sp|E9PV24|FIBA_MOUSE Fibrinogen alpha chain OS=Mus musculus OX=10090 GN=Fga PE=1 SV=1	5	8.5	87.428	17.583	4	3	2	0	0	0	2017100	2300300	1319600	173150	189850	194620
sp|E9PYH6|SET1A_MOUSE	sp|E9PYH6|SET1A_MOUSE	>sp|E9PYH6|SET1A_MOUSE Histone-lysine N-methyltransferase SETD1A OS=Mus musculus OX=10090 GN=Setd1a PE=1 SV=1	5	5.2	186.06	14.879	3	2	5	1	2	4	386160	418420	335800	228180	620530	468510
sp|E9Q1P8|I2BP2_MOUSE	sp|E9Q1P8|I2BP2_MOUSE	>sp|E9Q1P8|I2BP2_MOUSE Interferon regulatory factor 2-binding protein 2 OS=Mus musculus OX=10090 GN=Irf2bp2 PE=1 SV=1	5	15.6	59.291	35.983	4	8	9	9	9	5	3494300	3419800	3361900	5648800	2917700	3066300
sp|E9Q394|AKP13_MOUSE	sp|E9Q394|AKP13_MOUSE;tr|A0A140LJJ5|A0A140LJJ5_MOUSE;tr|A0A140LHG3|A0A140LHG3_MOUSE;tr|A0A140LIX0|A0A140LIX0_MOUSE	>sp|E9Q394|AKP13_MOUSE A-kinase anchor protein 13 OS=Mus musculus OX=10090 GN=Akap13 PE=1 SV=1;>tr|A0A140LJJ5|A0A140LJJ5_MOUSE A-kinase anchor protein 13 OS=Mus musculus OX=10090 GN=Akap13 PE=1 SV=1;>tr|A0A140LHG3|A0A140LHG3_MOUSE A-kinase anchor protein 1	6	3.5	303.97	16.149	4	4	6	3	4	4	7429400	5628200	4454300	6929600	9348000	7788100
tr|E9Q6R4|E9Q6R4_MOUSE	tr|E9Q6R4|E9Q6R4_MOUSE;sp|E9Q4N7|ARI1B_MOUSE;tr|A0A338P6U8|A0A338P6U8_MOUSE	>tr|E9Q6R4|E9Q6R4_MOUSE AT-rich interactive domain-containing protein 1B OS=Mus musculus OX=10090 GN=Arid1b PE=1 SV=1;>sp|E9Q4N7|ARI1B_MOUSE AT-rich interactive domain-containing protein 1B OS=Mus musculus OX=10090 GN=Arid1b PE=1 SV=1;>tr|A0A338P6U8|A0A338	4	3.7	237.02	9.825	0	0	1	0	2	1	99547	26958	141730	0	493430	166640
tr|A0A286YDA2|A0A286YDA2_MOUSE	tr|A0A286YDA2|A0A286YDA2_MOUSE;tr|A0A286YDT3|A0A286YDT3_MOUSE;tr|A0A286YDV7|A0A286YDV7_MOUSE;sp|E9Q5C9|NOLC1_MOUSE	>tr|A0A286YDA2|A0A286YDA2_MOUSE Nucleolar and coiled-body phosphoprotein 1 OS=Mus musculus OX=10090 GN=Nolc1 PE=1 SV=1;>tr|A0A286YDT3|A0A286YDT3_MOUSE Nucleolar and coiled-body phosphoprotein 1 OS=Mus musculus OX=10090 GN=Nolc1 PE=1 SV=1;>tr|A0A286YDV7|A0A	7	8.6	73.427	32.126	7	9	11	10	8	8	4841900	6698000	6648900	10248000	8166400	6436300
sp|E9Q5K9|YTDC1_MOUSE	sp|E9Q5K9|YTDC1_MOUSE;tr|D6RG95|D6RG95_MOUSE	>sp|E9Q5K9|YTDC1_MOUSE YTH domain-containing protein 1 OS=Mus musculus OX=10090 GN=Ythdc1 PE=1 SV=2;>tr|D6RG95|D6RG95_MOUSE YTH domain-containing protein 1 OS=Mus musculus OX=10090 GN=Ythdc1 PE=1 SV=1	3	4.9	85.648	6.9755	1	1	1	1	3	1	543600	810470	639120	967290	1069900	1345600
sp|E9Q6J5|BD1L1_MOUSE	sp|E9Q6J5|BD1L1_MOUSE	>sp|E9Q6J5|BD1L1_MOUSE Biorientation of chromosomes in cell division protein 1-like 1 OS=Mus musculus OX=10090 GN=Bod1l PE=1 SV=1	2	1	327.45	3.3258	1	0	0	1	0	0	41706	0	0	0	0	0
sp|E9Q7G0|NUMA1_MOUSE	sp|E9Q7G0|NUMA1_MOUSE;tr|A0A1B0GSW3|A0A1B0GSW3_MOUSE	>sp|E9Q7G0|NUMA1_MOUSE Nuclear mitotic apparatus protein 1 OS=Mus musculus OX=10090 GN=Numa1 PE=1 SV=1;>tr|A0A1B0GSW3|A0A1B0GSW3_MOUSE Nuclear mitotic apparatus protein 1 (Fragment) OS=Mus musculus OX=10090 GN=Numa1 PE=1 SV=1	33	33.8	235.63	323.31	49	51	53	57	53	58	10686000	11244000	11713000	15652000	12565000	14992000
sp|E9QAT4|SC16A_MOUSE	sp|E9QAT4|SC16A_MOUSE	>sp|E9QAT4|SC16A_MOUSE Protein transport protein Sec16A OS=Mus musculus OX=10090 GN=Sec16a PE=1 SV=1	8	5.6	254.2	28.055	2	3	1	7	6	4	332530	513080	122520	905450	738570	851280
sp|F7BJB9|MORC3_MOUSE	sp|F7BJB9|MORC3_MOUSE	>sp|F7BJB9|MORC3_MOUSE MORC family CW-type zinc finger protein 3 OS=Mus musculus OX=10090 GN=Morc3 PE=1 SV=1	1	2.1	106.52	7.1588	0	1	1	1	0	1	87972	422260	230980	494010	726810	259220
sp|F8VPQ2|ARI4A_MOUSE	sp|F8VPQ2|ARI4A_MOUSE;tr|Q8BY40|Q8BY40_MOUSE;tr|E9Q9V1|E9Q9V1_MOUSE	>sp|F8VPQ2|ARI4A_MOUSE AT-rich interactive domain-containing protein 4A OS=Mus musculus OX=10090 GN=Arid4a PE=1 SV=1;>tr|Q8BY40|Q8BY40_MOUSE AT-rich interactive domain-containing protein 4A (Fragment) OS=Mus musculus OX=10090 GN=Arid4a PE=1 SV=1;>tr|E9Q9V1	2	3.1	142.05	3.6277	0	0	0	1	0	1	105820	0	0	424940	48643	191210
sp|F8VPZ9|BICRA_MOUSE	sp|F8VPZ9|BICRA_MOUSE	>sp|F8VPZ9|BICRA_MOUSE BRD4-interacting chromatin-remodeling complex-associated protein OS=Mus musculus OX=10090 GN=Bicra PE=1 SV=1	2	1.5	161.35	4.7113	1	0	1	1	1	2	157770	0	144860	62056	0	0
sp|O08529|CAN2_MOUSE	sp|O08529|CAN2_MOUSE	>sp|O08529|CAN2_MOUSE Calpain-2 catalytic subunit OS=Mus musculus OX=10090 GN=Capn2 PE=1 SV=4	5	8.9	79.871	15.441	2	4	2	3	4	3	1949700	3633600	3089400	3253800	2554800	3664400
tr|E9Q6R3|E9Q6R3_MOUSE	tr|E9Q6R3|E9Q6R3_MOUSE;sp|O08547|SC22B_MOUSE	>tr|E9Q6R3|E9Q6R3_MOUSE Vesicle-trafficking protein SEC22b OS=Mus musculus OX=10090 GN=Sec22b PE=1 SV=1;>sp|O08547|SC22B_MOUSE Vesicle-trafficking protein SEC22b OS=Mus musculus OX=10090 GN=Sec22b PE=1 SV=3	3	21.7	18.922	15.366	1	2	3	2	3	3	2439600	2702400	2511400	2764000	1370400	2021900
sp|O08553|DPYL2_MOUSE	sp|O08553|DPYL2_MOUSE	>sp|O08553|DPYL2_MOUSE Dihydropyrimidinase-related protein 2 OS=Mus musculus OX=10090 GN=Dpysl2 PE=1 SV=2	18	48.6	62.277	265.97	26	31	34	34	34	40	37236000	34538000	32154000	50284000	38721000	45893000
tr|B1AQR8|B1AQR8_MOUSE	tr|B1AQR8|B1AQR8_MOUSE;tr|G3X9T7|G3X9T7_MOUSE;sp|O08573|LEG9_MOUSE	>tr|B1AQR8|B1AQR8_MOUSE Galectin OS=Mus musculus OX=10090 GN=Lgals9 PE=1 SV=1;>tr|G3X9T7|G3X9T7_MOUSE Galectin OS=Mus musculus OX=10090 GN=Lgals9 PE=1 SV=1;>sp|O08573|LEG9_MOUSE Galectin-9 OS=Mus musculus OX=10090 GN=Lgals9 PE=1 SV=1	3	9.1	39.907	7.1014	1	1	0	1	0	1	648050	1833000	1827200	2005100	2045000	2454200
tr|Q3THM8|Q3THM8_MOUSE	tr|Q3THM8|Q3THM8_MOUSE;tr|B7FAU5|B7FAU5_MOUSE;sp|O08579|EMD_MOUSE;tr|I7HJS1|I7HJS1_MOUSE	>tr|Q3THM8|Q3THM8_MOUSE Emerin OS=Mus musculus OX=10090 GN=Emd PE=1 SV=1;>tr|B7FAU5|B7FAU5_MOUSE Emerin OS=Mus musculus OX=10090 GN=Emd PE=1 SV=1;>sp|O08579|EMD_MOUSE Emerin OS=Mus musculus OX=10090 GN=Emd PE=1 SV=1;>tr|I7HJS1|I7HJS1_MOUSE Emerin OS=Mus mu	5	41.8	18.211	20.285	1	3	3	2	3	4	5522500	9514100	8555300	7802900	7846500	9653700
sp|O08583|THOC4_MOUSE	sp|O08583|THOC4_MOUSE	>sp|O08583|THOC4_MOUSE THO complex subunit 4 OS=Mus musculus OX=10090 GN=Alyref PE=1 SV=3	7	36.5	26.94	95.057	10	15	11	12	11	13	17729000	24521000	23510000	31299000	26074000	29843000
sp|O08600|NUCG_MOUSE	sp|O08600|NUCG_MOUSE	>sp|O08600|NUCG_MOUSE Endonuclease G, mitochondrial OS=Mus musculus OX=10090 GN=Endog PE=1 SV=1	3	13.6	32.19	6.6316	2	2	2	0	0	1	453940	1221400	950640	126990	293480	1306500
tr|Q3TMN1|Q3TMN1_MOUSE	tr|Q3TMN1|Q3TMN1_MOUSE;sp|O08663|MAP2_MOUSE;tr|Q3UI33|Q3UI33_MOUSE	>tr|Q3TMN1|Q3TMN1_MOUSE Methionine aminopeptidase 2 OS=Mus musculus OX=10090 GN=Metap2 PE=1 SV=1;>sp|O08663|MAP2_MOUSE Methionine aminopeptidase 2 OS=Mus musculus OX=10090 GN=Metap2 PE=1 SV=1;>tr|Q3UI33|Q3UI33_MOUSE Methionine aminopeptidase 2 OS=Mus muscu	5	15.2	50.526	20.989	3	4	6	8	4	5	2431100	2252900	4618500	4350600	3913800	2054500
sp|O08692|NGP_MOUSE	sp|O08692|NGP_MOUSE	>sp|O08692|NGP_MOUSE Neutrophilic granule protein OS=Mus musculus OX=10090 GN=Ngp PE=1 SV=1	3	22.2	19.331	15.212	4	4	4	3	3	3	6801400	8858900	7189200	4178000	5595100	6404100
tr|Q6GT24|Q6GT24_MOUSE	tr|Q6GT24|Q6GT24_MOUSE;sp|O08709|PRDX6_MOUSE;tr|D3Z0Y2|D3Z0Y2_MOUSE	>tr|Q6GT24|Q6GT24_MOUSE Peroxiredoxin-6 OS=Mus musculus OX=10090 GN=Prdx6 PE=1 SV=1;>sp|O08709|PRDX6_MOUSE Peroxiredoxin-6 OS=Mus musculus OX=10090 GN=Prdx6 PE=1 SV=3;>tr|D3Z0Y2|D3Z0Y2_MOUSE Peroxiredoxin-6 OS=Mus musculus OX=10090 GN=Prdx6 PE=1 SV=1	13	65.6	24.826	323.31	28	25	29	31	29	30	56780000	96782000	78808000	94237000	78637000	97818000
tr|D3YZ19|D3YZ19_MOUSE	tr|D3YZ19|D3YZ19_MOUSE;tr|D3YZ20|D3YZ20_MOUSE;tr|Q6PI63|Q6PI63_MOUSE;sp|O08740|RPB11_MOUSE	>tr|D3YZ19|D3YZ19_MOUSE DNA-directed RNA polymerase II subunit RPB11 OS=Mus musculus OX=10090 GN=Polr2j PE=1 SV=1;>tr|D3YZ20|D3YZ20_MOUSE DNA-directed RNA polymerase II subunit RPB11 OS=Mus musculus OX=10090 GN=Polr2j PE=1 SV=1;>tr|Q6PI63|Q6PI63_MOUSE DNA-	2	32.2	9.9693	5.8919	1	1	0	0	2	1	11654000	12665000	2656100	0	23206000	6184600
sp|O08749|DLDH_MOUSE	sp|O08749|DLDH_MOUSE	>sp|O08749|DLDH_MOUSE Dihydrolipoyl dehydrogenase, mitochondrial OS=Mus musculus OX=10090 GN=Dld PE=1 SV=2	9	23.6	54.272	42.376	10	12	11	12	14	15	9406900	14422000	9981800	15486000	14119000	16128000
sp|O08784|TCOF_MOUSE	sp|O08784|TCOF_MOUSE;tr|H3BL37|H3BL37_MOUSE;tr|H3BIX0|H3BIX0_MOUSE;tr|F6R3V4|F6R3V4_MOUSE	>sp|O08784|TCOF_MOUSE Treacle protein OS=Mus musculus OX=10090 GN=Tcof1 PE=1 SV=1;>tr|H3BL37|H3BL37_MOUSE Treacle protein OS=Mus musculus OX=10090 GN=Tcof1 PE=1 SV=1;>tr|H3BIX0|H3BIX0_MOUSE Treacle protein (Fragment) OS=Mus musculus OX=10090 GN=Tcof1 PE=1	19	18.9	135	148.56	24	25	32	25	31	36	13650000	19933000	20515000	20520000	20216000	16982000
sp|O08795|GLU2B_MOUSE	sp|O08795|GLU2B_MOUSE	>sp|O08795|GLU2B_MOUSE Glucosidase 2 subunit beta OS=Mus musculus OX=10090 GN=Prkcsh PE=1 SV=1	14	25	58.792	111.87	12	13	17	24	17	13	16386000	20454000	26260000	42126000	35607000	32681000
tr|B1AZS9|B1AZS9_MOUSE	tr|B1AZS9|B1AZS9_MOUSE;sp|O08807|PRDX4_MOUSE	>tr|B1AZS9|B1AZS9_MOUSE Peroxiredoxin-4 (Fragment) OS=Mus musculus OX=10090 GN=Prdx4 PE=1 SV=1;>sp|O08807|PRDX4_MOUSE Peroxiredoxin-4 OS=Mus musculus OX=10090 GN=Prdx4 PE=1 SV=1	3	16.2	26.391	29.127	5	6	5	6	9	6	20901000	27754000	21925000	52279000	25636000	28461000
tr|G3UZ34|G3UZ34_MOUSE	tr|G3UZ34|G3UZ34_MOUSE;sp|O08810|U5S1_MOUSE;tr|A2AH85|A2AH85_MOUSE	>tr|G3UZ34|G3UZ34_MOUSE 116 kDa U5 small nuclear ribonucleoprotein component OS=Mus musculus OX=10090 GN=Eftud2 PE=1 SV=1;>sp|O08810|U5S1_MOUSE 116 kDa U5 small nuclear ribonucleoprotein component OS=Mus musculus OX=10090 GN=Eftud2 PE=1 SV=1;>tr|A2AH85|A2A	31	38.9	108.34	157.8	27	34	34	43	37	37	14034000	17156000	16074000	24480000	20765000	20935000
sp|O08900|IKZF3_MOUSE	sp|O08900|IKZF3_MOUSE	>sp|O08900|IKZF3_MOUSE Zinc finger protein Aiolos OS=Mus musculus OX=10090 GN=Ikzf3 PE=1 SV=2	6	16.2	57.967	71.895	5	8	6	6	5	8	3531400	4445000	7223200	5453500	4551500	4980300
sp|O08915|AIP_MOUSE	sp|O08915|AIP_MOUSE;tr|D3YW40|D3YW40_MOUSE	>sp|O08915|AIP_MOUSE AH receptor-interacting protein OS=Mus musculus OX=10090 GN=Aip PE=1 SV=1;>tr|D3YW40|D3YW40_MOUSE AH receptor-interacting protein (Fragment) OS=Mus musculus OX=10090 GN=Aip PE=1 SV=1	9	34.5	37.605	49.685	10	12	10	11	10	12	20265000	13209000	16682000	19721000	20469000	23333000
sp|O08997|ATOX1_MOUSE	sp|O08997|ATOX1_MOUSE	>sp|O08997|ATOX1_MOUSE Copper transport protein ATOX1 OS=Mus musculus OX=10090 GN=Atox1 PE=1 SV=1	3	47.1	7.3384	24.936	5	5	3	7	3	6	53644000	101310000	40841000	50757000	23884000	67374000
sp|O09000|NCOA3_MOUSE	sp|O09000|NCOA3_MOUSE;tr|A2A468|A2A468_MOUSE;tr|Q05BA5|Q05BA5_MOUSE	>sp|O09000|NCOA3_MOUSE Nuclear receptor coactivator 3 OS=Mus musculus OX=10090 GN=Ncoa3 PE=1 SV=2;>tr|A2A468|A2A468_MOUSE Nuclear receptor coactivator OS=Mus musculus OX=10090 GN=Ncoa3 PE=1 SV=1;>tr|Q05BA5|Q05BA5_MOUSE Nuclear receptor coactivator OS=Mus m	7	8.2	151.57	21.152	6	3	4	3	2	5	345990	225640	402230	1146700	850170	842180
sp|O09044|SNP23_MOUSE	sp|O09044|SNP23_MOUSE;tr|Q9D3L3|Q9D3L3_MOUSE;tr|B0R029|B0R029_MOUSE;tr|E9Q8A1|E9Q8A1_MOUSE;tr|B0R030|B0R030_MOUSE	>sp|O09044|SNP23_MOUSE Synaptosomal-associated protein 23 OS=Mus musculus OX=10090 GN=Snap23 PE=1 SV=1;>tr|Q9D3L3|Q9D3L3_MOUSE Synaptosomal-associated protein OS=Mus musculus OX=10090 GN=Snap23 PE=1 SV=1;>tr|B0R029|B0R029_MOUSE Synaptosomal-associated prot	2	15.7	23.261	5.5733	1	0	2	1	0	2	1266000	1503000	959310	650890	571930	1130600
sp|O09061|PSB1_MOUSE	sp|O09061|PSB1_MOUSE;tr|A0A338P7C0|A0A338P7C0_MOUSE	>sp|O09061|PSB1_MOUSE Proteasome subunit beta type-1 OS=Mus musculus OX=10090 GN=Psmb1 PE=1 SV=1;>tr|A0A338P7C0|A0A338P7C0_MOUSE Proteasome subunit beta type-1 OS=Mus musculus OX=10090 GN=Psmb1 PE=1 SV=1	8	34.2	26.372	120.7	8	10	11	11	13	13	20081000	34510000	29231000	38357000	27980000	31604000
sp|O09106|HDAC1_MOUSE	sp|O09106|HDAC1_MOUSE	>sp|O09106|HDAC1_MOUSE Histone deacetylase 1 OS=Mus musculus OX=10090 GN=Hdac1 PE=1 SV=1	3	17	55.074	24.713	4	5	6	7	5	9	13125000	25387000	14411000	32583000	27278000	25082000
sp|O09130|NF2IP_MOUSE	sp|O09130|NF2IP_MOUSE	>sp|O09130|NF2IP_MOUSE NFATC2-interacting protein OS=Mus musculus OX=10090 GN=Nfatc2ip PE=1 SV=1	7	29.6	45.121	20.529	8	7	6	5	5	9	3747600	5228700	6736200	4764200	4372400	5185000
sp|O09131|GSTO1_MOUSE	sp|O09131|GSTO1_MOUSE	>sp|O09131|GSTO1_MOUSE Glutathione S-transferase omega-1 OS=Mus musculus OX=10090 GN=Gsto1 PE=1 SV=2	10	40.8	27.497	27.482	11	14	10	11	11	7	9915300	23438000	12250000	24738000	16348000	17764000
sp|O09159|MA2B1_MOUSE	sp|O09159|MA2B1_MOUSE	>sp|O09159|MA2B1_MOUSE Lysosomal alpha-mannosidase OS=Mus musculus OX=10090 GN=Man2b1 PE=1 SV=4	3	3.8	114.65	10.309	1	2	1	1	4	1	413690	141400	145880	584980	525300	167970
tr|Q9CQM8|Q9CQM8_MOUSE	tr|Q9CQM8|Q9CQM8_MOUSE;sp|O09167|RL21_MOUSE	>tr|Q9CQM8|Q9CQM8_MOUSE 60S ribosomal protein L21 OS=Mus musculus OX=10090 GN=Rpl21 PE=1 SV=1;>sp|O09167|RL21_MOUSE 60S ribosomal protein L21 OS=Mus musculus OX=10090 GN=Rpl21 PE=1 SV=3	3	21.2	18.579	8.2086	3	4	2	2	1	1	7391800	12526000	9374000	4481900	6350600	2065400
sp|O35127|C10_MOUSE	sp|O35127|C10_MOUSE	>sp|O35127|C10_MOUSE Protein C10 OS=Mus musculus OX=10090 GN=Grcc10 PE=1 SV=1	1	14.3	13.194	5.4148	0	2	2	2	1	2	535530	1203300	1177700	3261200	1228300	1981600
sp|O35129|PHB2_MOUSE	sp|O35129|PHB2_MOUSE;tr|F6QPR1|F6QPR1_MOUSE	>sp|O35129|PHB2_MOUSE Prohibitin-2 OS=Mus musculus OX=10090 GN=Phb2 PE=1 SV=1;>tr|F6QPR1|F6QPR1_MOUSE Prohibitin-2 (Fragment) OS=Mus musculus OX=10090 GN=Phb2 PE=1 SV=1	12	46.5	33.296	71.02	11	15	12	12	13	11	10760000	14039000	12026000	11334000	10310000	10175000
sp|O35215|DOPD_MOUSE	sp|O35215|DOPD_MOUSE;tr|G3UZN1|G3UZN1_MOUSE;tr|G3UYJ7|G3UYJ7_MOUSE	>sp|O35215|DOPD_MOUSE D-dopachrome decarboxylase OS=Mus musculus OX=10090 GN=Ddt PE=1 SV=3;>tr|G3UZN1|G3UZN1_MOUSE D-dopachrome decarboxylase OS=Mus musculus OX=10090 GN=Ddt PE=1 SV=1;>tr|G3UYJ7|G3UYJ7_MOUSE Predicted gene 20441 (Fragment) OS=Mus musculus	6	69.5	13.077	48.129	2	5	3	7	5	4	11539000	16510000	33960000	18776000	38446000	38143000
sp|O35218|CPSF2_MOUSE	sp|O35218|CPSF2_MOUSE	>sp|O35218|CPSF2_MOUSE Cleavage and polyadenylation specificity factor subunit 2 OS=Mus musculus OX=10090 GN=Cpsf2 PE=1 SV=1	9	12.7	88.382	25.427	7	8	9	8	8	7	1442600	1592400	896420	1675500	2049300	2173100
sp|O35226|PSMD4_MOUSE	sp|O35226|PSMD4_MOUSE	>sp|O35226|PSMD4_MOUSE 26S proteasome non-ATPase regulatory subunit 4 OS=Mus musculus OX=10090 GN=Psmd4 PE=1 SV=1	7	28.2	40.703	37.401	6	7	7	10	9	12	13438000	13270000	15290000	19771000	17711000	20684000
sp|O35286|DHX15_MOUSE	sp|O35286|DHX15_MOUSE;tr|Q497W9|Q497W9_MOUSE;tr|A0A0G2JG10|A0A0G2JG10_MOUSE	>sp|O35286|DHX15_MOUSE Pre-mRNA-splicing factor ATP-dependent RNA helicase DHX15 OS=Mus musculus OX=10090 GN=Dhx15 PE=1 SV=2;>tr|Q497W9|Q497W9_MOUSE DEAH (Asp-Glu-Ala-His) box polypeptide 15 OS=Mus musculus OX=10090 GN=Dhx15 PE=1 SV=1;>tr|A0A0G2JG10|A0A0G2	20	27	91.006	99.971	25	29	27	22	27	23	9082600	12080000	9995600	9195100	8856400	11988000
sp|O35295|PURB_MOUSE	sp|O35295|PURB_MOUSE	>sp|O35295|PURB_MOUSE Transcriptional activator protein Pur-beta OS=Mus musculus OX=10090 GN=Purb PE=1 SV=3	9	47.2	33.901	43.503	3	6	6	6	7	7	30805000	37987000	30482000	45387000	46146000	52434000
sp|O35309|NMI_MOUSE	sp|O35309|NMI_MOUSE	>sp|O35309|NMI_MOUSE N-myc-interactor OS=Mus musculus OX=10090 GN=Nmi PE=1 SV=1	6	22.9	35.235	21.408	6	4	7	7	5	5	8664100	10462000	9592500	13903000	7653900	8617300
sp|O35326|SRSF5_MOUSE	sp|O35326|SRSF5_MOUSE;tr|Q9D8S5|Q9D8S5_MOUSE	>sp|O35326|SRSF5_MOUSE Serine/arginine-rich splicing factor 5 OS=Mus musculus OX=10090 GN=Srsf5 PE=1 SV=2;>tr|Q9D8S5|Q9D8S5_MOUSE MCG7614, isoform CRA_c OS=Mus musculus OX=10090 GN=Srsf5 PE=1 SV=1	5	27.1	30.891	25.037	7	5	7	8	8	7	28437000	49254000	45215000	43640000	32528000	39323000
sp|O35343|IMA3_MOUSE	sp|O35343|IMA3_MOUSE;tr|A0A0B4J1E7|A0A0B4J1E7_MOUSE;tr|D3YTN1|D3YTN1_MOUSE	>sp|O35343|IMA3_MOUSE Importin subunit alpha-3 OS=Mus musculus OX=10090 GN=Kpna4 PE=1 SV=1;>tr|A0A0B4J1E7|A0A0B4J1E7_MOUSE Importin subunit alpha-3 OS=Mus musculus OX=10090 GN=Kpna4 PE=1 SV=1;>tr|D3YTN1|D3YTN1_MOUSE Importin subunit alpha-3 (Fragment) OS=M	3	15.5	57.922	24.749	5	4	7	2	5	5	3307500	4887400	6037700	6112000	4362100	5042400
sp|O35344|IMA4_MOUSE	sp|O35344|IMA4_MOUSE	>sp|O35344|IMA4_MOUSE Importin subunit alpha-4 OS=Mus musculus OX=10090 GN=Kpna3 PE=1 SV=1	2	10	57.772	4.2533	1	1	0	1	0	2	891360	213600	475420	851460	481050	559360
sp|O35345|IMA7_MOUSE	sp|O35345|IMA7_MOUSE	>sp|O35345|IMA7_MOUSE Importin subunit alpha-7 OS=Mus musculus OX=10090 GN=Kpna6 PE=1 SV=2	1	2.4	59.964	4.9577	0	0	1	1	1	1	476660	0	594330	567680	408280	480030
sp|O35350|CAN1_MOUSE	sp|O35350|CAN1_MOUSE	>sp|O35350|CAN1_MOUSE Calpain-1 catalytic subunit OS=Mus musculus OX=10090 GN=Capn1 PE=1 SV=1	17	27.8	82.105	111.05	15	19	19	25	23	21	5500700	7496700	7651700	7876100	6887300	7922600
sp|O35368|IFI3_MOUSE	sp|O35368|IFI3_MOUSE;tr|E9PUG6|E9PUG6_MOUSE;tr|A0A0R4J0H6|A0A0R4J0H6_MOUSE;tr|E9QAN9|E9QAN9_MOUSE	>sp|O35368|IFI3_MOUSE Interferon-activable protein 203 OS=Mus musculus OX=10090 GN=Ifi203 PE=1 SV=1;>tr|E9PUG6|E9PUG6_MOUSE Interferon-activable protein 203 OS=Mus musculus OX=10090 GN=Ifi203 PE=1 SV=1;>tr|A0A0R4J0H6|A0A0R4J0H6_MOUSE Interferon-activable p	1	2.7	46.299	2.9995	1	2	1	0	1	1	227940	296310	749700	249130	231520	278030
sp|O35381|AN32A_MOUSE	sp|O35381|AN32A_MOUSE;tr|D3YYE1|D3YYE1_MOUSE;tr|D3Z7M9|D3Z7M9_MOUSE;tr|F6UFG6|F6UFG6_MOUSE	>sp|O35381|AN32A_MOUSE Acidic leucine-rich nuclear phosphoprotein 32 family member A OS=Mus musculus OX=10090 GN=Anp32a PE=1 SV=1;>tr|D3YYE1|D3YYE1_MOUSE Acidic leucine-rich nuclear phosphoprotein 32 family member A (Fragment) OS=Mus musculus OX=10090 GN=A	9	28.3	28.537	169.7	24	23	28	30	26	26	209940000	289110000	242880000	306370000	292690000	281570000
sp|O35405|PLD3_MOUSE	sp|O35405|PLD3_MOUSE	>sp|O35405|PLD3_MOUSE Phospholipase D3 OS=Mus musculus OX=10090 GN=Pld3 PE=1 SV=1	3	6.6	54.388	9.2965	4	4	5	3	4	4	3726700	6561300	2366100	2152800	2618800	3287600
sp|O35459|ECH1_MOUSE	sp|O35459|ECH1_MOUSE;tr|F7B227|F7B227_MOUSE	>sp|O35459|ECH1_MOUSE Delta(3,5)-Delta(2,4)-dienoyl-CoA isomerase, mitochondrial OS=Mus musculus OX=10090 GN=Ech1 PE=1 SV=1;>tr|F7B227|F7B227_MOUSE Delta(3,5)-Delta(2,4)-dienoyl-CoA isomerase, mitochondrial (Fragment) OS=Mus musculus OX=10090 GN=Ech1 PE=1	4	20.2	36.118	26.664	2	3	1	2	4	3	914380	3728600	1044000	2930900	3282500	2469200
tr|D3Z597|D3Z597_MOUSE	tr|D3Z597|D3Z597_MOUSE;sp|O35465|FKBP8_MOUSE	>tr|D3Z597|D3Z597_MOUSE Peptidyl-prolyl cis-trans isomerase FKBP8 (Fragment) OS=Mus musculus OX=10090 GN=Fkbp8 PE=1 SV=1;>sp|O35465|FKBP8_MOUSE Peptidyl-prolyl cis-trans isomerase FKBP8 OS=Mus musculus OX=10090 GN=Fkbp8 PE=1 SV=2	1	23.2	5.9074	3.2899	0	0	0	0	0	1	15305000	0	0	0	509400	5946300
sp|O35551|RABE1_MOUSE	sp|O35551|RABE1_MOUSE;tr|J3QJV7|J3QJV7_MOUSE	>sp|O35551|RABE1_MOUSE Rab GTPase-binding effector protein 1 OS=Mus musculus OX=10090 GN=Rabep1 PE=1 SV=2;>tr|J3QJV7|J3QJV7_MOUSE Rab GTPase-binding effector protein 1 OS=Mus musculus OX=10090 GN=Rabep1 PE=1 SV=1	3	4.4	99.523	7.0699	1	4	0	1	1	1	78594	301680	113190	68724	118360	328340
sp|O35593|PSDE_MOUSE	sp|O35593|PSDE_MOUSE	>sp|O35593|PSDE_MOUSE 26S proteasome non-ATPase regulatory subunit 14 OS=Mus musculus OX=10090 GN=Psmd14 PE=1 SV=2	4	16.1	34.577	20.474	6	8	10	6	6	7	6738400	9734800	7773100	10695000	6864400	10310000
sp|O35601|FYB1_MOUSE	sp|O35601|FYB1_MOUSE	>sp|O35601|FYB1_MOUSE FYN-binding protein 1 OS=Mus musculus OX=10090 GN=Fyb1 PE=1 SV=2	17	36.6	90.054	117.3	20	16	17	23	21	20	24711000	25137000	21291000	35435000	34227000	34982000
sp|O35638|STAG2_MOUSE	sp|O35638|STAG2_MOUSE;tr|A2AFF6|A2AFF6_MOUSE	>sp|O35638|STAG2_MOUSE Cohesin subunit SA-2 OS=Mus musculus OX=10090 GN=Stag2 PE=1 SV=3;>tr|A2AFF6|A2AFF6_MOUSE Cohesin subunit SA-2 OS=Mus musculus OX=10090 GN=Stag2 PE=1 SV=1	5	6.8	141.28	18.869	1	0	1	5	3	4	121050	297200	217700	667750	502730	484060
tr|Q5SVG5|Q5SVG5_MOUSE	tr|Q5SVG5|Q5SVG5_MOUSE;tr|Q5SVG4|Q5SVG4_MOUSE;sp|O35643|AP1B1_MOUSE	>tr|Q5SVG5|Q5SVG5_MOUSE AP complex subunit beta OS=Mus musculus OX=10090 GN=Ap1b1 PE=1 SV=1;>tr|Q5SVG4|Q5SVG4_MOUSE AP complex subunit beta OS=Mus musculus OX=10090 GN=Ap1b1 PE=1 SV=1;>sp|O35643|AP1B1_MOUSE AP-1 complex subunit beta-1 OS=Mus musculus OX=10	5	14.1	101.19	42.853	5	6	5	3	6	3	2385300	2318700	1712100	1895900	2160900	1967600
tr|A0A286YCB3|A0A286YCB3_MOUSE	tr|A0A286YCB3|A0A286YCB3_MOUSE;tr|A0A286YD15|A0A286YD15_MOUSE;tr|A0A286YDS3|A0A286YDS3_MOUSE;tr|A0A286YDP0|A0A286YDP0_MOUSE;sp|O35648|CETN3_MOUSE	>tr|A0A286YCB3|A0A286YCB3_MOUSE Centrin-3 (Fragment) OS=Mus musculus OX=10090 GN=Cetn3 PE=1 SV=1;>tr|A0A286YD15|A0A286YD15_MOUSE Centrin-3 (Fragment) OS=Mus musculus OX=10090 GN=Cetn3 PE=1 SV=1;>tr|A0A286YDS3|A0A286YDS3_MOUSE Centrin-3 (Fragment) OS=Mus mu	1	13.8	9.8559	4.4799	1	1	1	1	1	1	0	925740	0	2856900	1504100	1617300
sp|O35654|DPOD2_MOUSE	sp|O35654|DPOD2_MOUSE;tr|A8Y5G7|A8Y5G7_MOUSE	>sp|O35654|DPOD2_MOUSE DNA polymerase delta subunit 2 OS=Mus musculus OX=10090 GN=Pold2 PE=1 SV=2;>tr|A8Y5G7|A8Y5G7_MOUSE DNA polymerase delta subunit 2 (Fragment) OS=Mus musculus OX=10090 GN=Pold2 PE=1 SV=1	5	13.6	51.354	18.467	4	5	3	3	1	4	1499800	1091900	1437300	1273500	636680	1875900
sp|O35685|NUDC_MOUSE	sp|O35685|NUDC_MOUSE	>sp|O35685|NUDC_MOUSE Nuclear migration protein nudC OS=Mus musculus OX=10090 GN=Nudc PE=1 SV=1	10	26.8	38.358	26.619	8	8	6	8	9	13	8808200	10240000	15447000	11036000	12941000	12022000
sp|O35691|PININ_MOUSE	sp|O35691|PININ_MOUSE;tr|Q3TUQ5|Q3TUQ5_MOUSE	>sp|O35691|PININ_MOUSE Pinin OS=Mus musculus OX=10090 GN=Pnn PE=1 SV=4;>tr|Q3TUQ5|Q3TUQ5_MOUSE Pinin OS=Mus musculus OX=10090 GN=Pnn PE=1 SV=1	13	21.2	82.435	43.966	6	9	7	8	8	10	6215700	7361500	9575800	9182400	9072100	9531300
sp|O35730|RING1_MOUSE	sp|O35730|RING1_MOUSE	>sp|O35730|RING1_MOUSE E3 ubiquitin-protein ligase RING1 OS=Mus musculus OX=10090 GN=Ring1 PE=1 SV=2	1	7.6	42.63	4.3945	0	2	0	1	3	0	158110	328120	305600	614750	733850	556340
sp|O35737|HNRH1_MOUSE	sp|O35737|HNRH1_MOUSE;tr|Q8C2Q7|Q8C2Q7_MOUSE	>sp|O35737|HNRH1_MOUSE Heterogeneous nuclear ribonucleoprotein H OS=Mus musculus OX=10090 GN=Hnrnph1 PE=1 SV=3;>tr|Q8C2Q7|Q8C2Q7_MOUSE Heterogeneous nuclear ribonucleoprotein H OS=Mus musculus OX=10090 GN=Hnrnph1 PE=1 SV=1	7	42.3	49.199	323.31	22	30	29	29	35	34	87860000	121030000	128060000	139440000	122200000	134130000
sp|O35744|CHIL3_MOUSE	sp|O35744|CHIL3_MOUSE	>sp|O35744|CHIL3_MOUSE Chitinase-like protein 3 OS=Mus musculus OX=10090 GN=Chil3 PE=1 SV=2	9	26.9	44.458	25.604	10	10	12	6	3	3	7257200	6398200	7037300	3471000	2451800	2835600
sp|O35841|API5_MOUSE	sp|O35841|API5_MOUSE	>sp|O35841|API5_MOUSE Apoptosis inhibitor 5 OS=Mus musculus OX=10090 GN=Api5 PE=1 SV=2	5	11.9	56.784	19.163	4	4	4	3	4	5	4046300	4412100	3419700	3299600	4671900	2027700
tr|A0A1B0GX27|A0A1B0GX27_MOUSE	tr|A0A1B0GX27|A0A1B0GX27_MOUSE;sp|O35855|BCAT2_MOUSE;tr|O88374|O88374_MOUSE	>tr|A0A1B0GX27|A0A1B0GX27_MOUSE Branched-chain-amino-acid aminotransferase OS=Mus musculus OX=10090 GN=Bcat2 PE=1 SV=1;>sp|O35855|BCAT2_MOUSE Branched-chain-amino-acid aminotransferase, mitochondrial OS=Mus musculus OX=10090 GN=Bcat2 PE=1 SV=2;>tr|O88374|O	5	15.7	43.493	33.702	3	2	2	3	4	4	4391500	5092900	3743200	6041000	6520600	6992700
sp|O35857|TIM44_MOUSE	sp|O35857|TIM44_MOUSE	>sp|O35857|TIM44_MOUSE Mitochondrial import inner membrane translocase subunit TIM44 OS=Mus musculus OX=10090 GN=Timm44 PE=1 SV=2	3	8.6	51.091	8.5346	0	4	1	1	2	3	599030	985870	548670	467360	728870	1006500
sp|O35864|CSN5_MOUSE	sp|O35864|CSN5_MOUSE;tr|A0A087WQA8|A0A087WQA8_MOUSE	>sp|O35864|CSN5_MOUSE COP9 signalosome complex subunit 5 OS=Mus musculus OX=10090 GN=Cops5 PE=1 SV=3;>tr|A0A087WQA8|A0A087WQA8_MOUSE COP9 signalosome complex subunit 5 (Fragment) OS=Mus musculus OX=10090 GN=Cops5 PE=1 SV=1	4	13.8	37.548	11.43	4	2	2	3	1	2	1589800	1059200	1580400	2052700	2137900	2664000
sp|O35887|CALU_MOUSE	sp|O35887|CALU_MOUSE;tr|G3UY49|G3UY49_MOUSE;tr|G3UWV3|G3UWV3_MOUSE;tr|G3UWR0|G3UWR0_MOUSE	>sp|O35887|CALU_MOUSE Calumenin OS=Mus musculus OX=10090 GN=Calu PE=1 SV=1;>tr|G3UY49|G3UY49_MOUSE Calumenin (Fragment) OS=Mus musculus OX=10090 GN=Calu PE=1 SV=2;>tr|G3UWV3|G3UWV3_MOUSE Calumenin OS=Mus musculus OX=10090 GN=Calu PE=1 SV=1;>tr|G3UWR0|G3UWR	2	18.7	37.063	49.361	9	6	9	8	10	7	17195000	11648000	18230000	27053000	24949000	28240000
sp|O35900|LSM2_MOUSE	sp|O35900|LSM2_MOUSE;tr|O35901|O35901_MOUSE	>sp|O35900|LSM2_MOUSE U6 snRNA-associated Sm-like protein LSm2 OS=Mus musculus OX=10090 GN=Lsm2 PE=1 SV=1;>tr|O35901|O35901_MOUSE U6 snRNA-associated Sm-like protein LSm2 OS=Mus musculus OX=10090 GN=Lsm2 PE=1 SV=1	3	52.6	10.834	91.429	9	7	10	9	8	8	36745000	35241000	36647000	65348000	28886000	42426000
tr|A0A3Q4EGP6|A0A3Q4EGP6_MOUSE	tr|A0A3Q4EGP6|A0A3Q4EGP6_MOUSE;tr|Q3UFC6|Q3UFC6_MOUSE;sp|O35902|DSG3_MOUSE	>tr|A0A3Q4EGP6|A0A3Q4EGP6_MOUSE Desmoglein-3 OS=Mus musculus OX=10090 GN=Dsg3 PE=4 SV=1;>tr|Q3UFC6|Q3UFC6_MOUSE Desmoglein-3 OS=Mus musculus OX=10090 GN=Dsg3 PE=1 SV=1;>sp|O35902|DSG3_MOUSE Desmoglein-3 OS=Mus musculus OX=10090 GN=Dsg3 PE=2 SV=1	1	0.8	101.36	2.7284	1	3	1	2	2	2	295700	327490	243290	484880	313170	333250
sp|O35943|FRDA_MOUSE	sp|O35943|FRDA_MOUSE	>sp|O35943|FRDA_MOUSE Frataxin, mitochondrial OS=Mus musculus OX=10090 GN=Fxn PE=1 SV=1	2	11.6	22.924	4.4818	0	1	1	3	1	0	1122800	805870	1063900	3099700	4124200	1363200
sp|O35954|PITM1_MOUSE	sp|O35954|PITM1_MOUSE	>sp|O35954|PITM1_MOUSE Membrane-associated phosphatidylinositol transfer protein 1 OS=Mus musculus OX=10090 GN=Pitpnm1 PE=1 SV=1	6	6.4	134.94	18.245	3	3	3	6	4	6	336650	384220	384880	719170	615590	584820
sp|O35955|PSB10_MOUSE	sp|O35955|PSB10_MOUSE	>sp|O35955|PSB10_MOUSE Proteasome subunit beta type-10 OS=Mus musculus OX=10090 GN=Psmb10 PE=1 SV=1	6	30.4	29.063	70.882	9	13	12	12	12	13	22613000	35056000	30193000	41381000	32087000	34494000
tr|A0A1B0GQZ1|A0A1B0GQZ1_MOUSE	tr|A0A1B0GQZ1|A0A1B0GQZ1_MOUSE;sp|O35972|RM23_MOUSE;tr|A0A1B0GSZ9|A0A1B0GSZ9_MOUSE	>tr|A0A1B0GQZ1|A0A1B0GQZ1_MOUSE 39S ribosomal protein L23, mitochondrial OS=Mus musculus OX=10090 GN=Mrpl23 PE=1 SV=1;>sp|O35972|RM23_MOUSE 39S ribosomal protein L23, mitochondrial OS=Mus musculus OX=10090 GN=Mrpl23 PE=1 SV=1;>tr|A0A1B0GSZ9|A0A1B0GSZ9_MOUS	1	12.9	11.89	3.0539	1	1	0	1	1	1	1184100	1390300	1066900	0	661940	0
tr|Q3UR63|Q3UR63_MOUSE	tr|Q3UR63|Q3UR63_MOUSE;tr|V9GXB8|V9GXB8_MOUSE;sp|O35984|PBX2_MOUSE;tr|G3UXL9|G3UXL9_MOUSE;tr|D9J2V6|D9J2V6_MOUSE;sp|P41778|PBX1_MOUSE	>tr|Q3UR63|Q3UR63_MOUSE Pre-B-cell leukemia transcription factor 2 OS=Mus musculus OX=10090 GN=Pbx2 PE=1 SV=1;>tr|V9GXB8|V9GXB8_MOUSE Pre B-cell leukemia transcription factor 2, isoform CRA_d OS=Mus musculus OX=10090 GN=Pbx2 PE=1 SV=1;>sp|O35984|PBX2_MOUSE	2	10.3	37.811	4.1127	6	0	0	0	3	2	808510	0	0	242040	1415900	389460
sp|O54734|OST48_MOUSE	sp|O54734|OST48_MOUSE	>sp|O54734|OST48_MOUSE Dolichyl-diphosphooligosaccharide--protein glycosyltransferase 48 kDa subunit OS=Mus musculus OX=10090 GN=Ddost PE=1 SV=2	7	16.3	49.027	21.025	6	6	4	7	5	5	6805800	7139900	5552300	6659300	7129400	6289100
sp|O54781|SRPK2_MOUSE	sp|O54781|SRPK2_MOUSE;tr|A0A0R4J124|A0A0R4J124_MOUSE	>sp|O54781|SRPK2_MOUSE SRSF protein kinase 2 OS=Mus musculus OX=10090 GN=Srpk2 PE=1 SV=2;>tr|A0A0R4J124|A0A0R4J124_MOUSE SRSF protein kinase 2 OS=Mus musculus OX=10090 GN=Srpk2 PE=1 SV=1	1	1.8	76.756	2.7133	0	0	0	1	1	1	16625	0	67049	141220	80123	0
tr|F6TMZ3|F6TMZ3_MOUSE	tr|F6TMZ3|F6TMZ3_MOUSE;sp|O54782|MA2B2_MOUSE	>tr|F6TMZ3|F6TMZ3_MOUSE Epididymis-specific alpha-mannosidase (Fragment) OS=Mus musculus OX=10090 GN=Man2b2 PE=1 SV=1;>sp|O54782|MA2B2_MOUSE Epididymis-specific alpha-mannosidase OS=Mus musculus OX=10090 GN=Man2b2 PE=1 SV=2	1	2.8	55.189	4.0181	1	1	1	1	2	1	216100	277050	295440	500090	1378900	283010
sp|O54786|DFFA_MOUSE	sp|O54786|DFFA_MOUSE	>sp|O54786|DFFA_MOUSE DNA fragmentation factor subunit alpha OS=Mus musculus OX=10090 GN=Dffa PE=1 SV=2	6	25.7	36.572	50.676	8	8	7	5	6	5	12142000	15270000	15523000	16392000	16533000	15647000
sp|O54824|IL16_MOUSE	sp|O54824|IL16_MOUSE	>sp|O54824|IL16_MOUSE Pro-interleukin-16 OS=Mus musculus OX=10090 GN=Il16 PE=1 SV=3	27	23.5	141.43	299	38	36	44	45	49	53	26684000	31580000	28048000	37769000	36710000	37140000
sp|O54916|REPS1_MOUSE	sp|O54916|REPS1_MOUSE;tr|D3Z2E3|D3Z2E3_MOUSE;tr|F6R6F1|F6R6F1_MOUSE;tr|E9Q632|E9Q632_MOUSE	>sp|O54916|REPS1_MOUSE RalBP1-associated Eps domain-containing protein 1 OS=Mus musculus OX=10090 GN=Reps1 PE=1 SV=2;>tr|D3Z2E3|D3Z2E3_MOUSE RalBP1-associated Eps domain-containing protein 1 OS=Mus musculus OX=10090 GN=Reps1 PE=1 SV=1;>tr|F6R6F1|F6R6F1_MOU	6	13.3	86.518	23.235	5	3	3	3	4	4	1170200	810190	1372300	853880	1252800	1006700
sp|O54941|SMCE1_MOUSE	sp|O54941|SMCE1_MOUSE	>sp|O54941|SMCE1_MOUSE SWI/SNF-related matrix-associated actin-dependent regulator of chromatin subfamily E member 1 OS=Mus musculus OX=10090 GN=Smarce1 PE=1 SV=1	8	36.5	46.638	43.612	5	8	11	14	9	10	7415800	5465100	7618000	11865000	10780000	11825000
tr|A0A0U1RP03|A0A0U1RP03_MOUSE	tr|A0A0U1RP03|A0A0U1RP03_MOUSE;sp|O54957|LAT_MOUSE	>tr|A0A0U1RP03|A0A0U1RP03_MOUSE Linker for activation of T-cells family member 1 OS=Mus musculus OX=10090 GN=Lat PE=1 SV=1;>sp|O54957|LAT_MOUSE Linker for activation of T-cells family member 1 OS=Mus musculus OX=10090 GN=Lat PE=1 SV=1	2	11.6	24.95	5.8737	2	1	0	2	2	1	3126000	352450	1973100	4211500	3126300	2806800
sp|O54962|BAF_MOUSE	sp|O54962|BAF_MOUSE	>sp|O54962|BAF_MOUSE Barrier-to-autointegration factor OS=Mus musculus OX=10090 GN=Banf1 PE=1 SV=1	6	64	10.102	56.773	1	6	7	16	13	7	6035100	51265000	36889000	137560000	62698000	45602000
sp|O54984|ASNA_MOUSE	sp|O54984|ASNA_MOUSE	>sp|O54984|ASNA_MOUSE ATPase Asna1 OS=Mus musculus OX=10090 GN=Asna1 PE=1 SV=2	4	17.8	38.822	9.8061	3	1	3	4	3	3	3029400	2652700	2805800	3740100	2255400	4185500
sp|O54988|SLK_MOUSE	sp|O54988|SLK_MOUSE	>sp|O54988|SLK_MOUSE STE20-like serine/threonine-protein kinase OS=Mus musculus OX=10090 GN=Slk PE=1 SV=2	2	3	141.46	3.9764	0	1	2	2	0	1	59814	224480	168050	232160	293770	203220
sp|O55013|TPPC3_MOUSE	sp|O55013|TPPC3_MOUSE	>sp|O55013|TPPC3_MOUSE Trafficking protein particle complex subunit 3 OS=Mus musculus OX=10090 GN=Trappc3 PE=1 SV=1	2	10.6	20.302	4.3896	1	1	2	1	1	1	684720	2452000	1719300	630680	584060	2103000
sp|O55022|PGRC1_MOUSE	sp|O55022|PGRC1_MOUSE	>sp|O55022|PGRC1_MOUSE Membrane-associated progesterone receptor component 1 OS=Mus musculus OX=10090 GN=Pgrmc1 PE=1 SV=4	2	4.6	21.694	5.1007	1	1	2	1	3	1	4508300	1141000	2699500	1111200	2104900	0
sp|O55029|COPB2_MOUSE	sp|O55029|COPB2_MOUSE	>sp|O55029|COPB2_MOUSE Coatomer subunit beta OS=Mus musculus OX=10090 GN=Copb2 PE=1 SV=2	13	19.8	102.45	43.231	11	11	12	15	10	11	3429600	3812800	3942500	4427600	4164800	4858000
sp|O55057|PDE6D_MOUSE	sp|O55057|PDE6D_MOUSE;tr|M0QWG6|M0QWG6_MOUSE	>sp|O55057|PDE6D_MOUSE Retinal rod rhodopsin-sensitive cGMP 3,5-cyclic phosphodiesterase subunit delta OS=Mus musculus OX=10090 GN=Pde6d PE=1 SV=1;>tr|M0QWG6|M0QWG6_MOUSE Retinal rod rhodopsin-sensitive cGMP 3,5-cyclic phosphodiesterase subunit delta O	3	25.3	17.348	7.6949	1	1	1	1	2	2	2560000	3950900	2605100	3280200	3897300	4201400
sp|O55098|STK10_MOUSE	sp|O55098|STK10_MOUSE	>sp|O55098|STK10_MOUSE Serine/threonine-protein kinase 10 OS=Mus musculus OX=10090 GN=Stk10 PE=1 SV=2	7	11.3	111.9	20.864	3	3	5	5	3	9	2852000	1496300	1745900	2365700	2169900	3170000
tr|H3BJY1|H3BJY1_MOUSE	tr|H3BJY1|H3BJY1_MOUSE;tr|H3BKF4|H3BKF4_MOUSE;tr|H3BIZ8|H3BIZ8_MOUSE;tr|B0QZP8|B0QZP8_MOUSE;sp|O55101|SNG2_MOUSE	>tr|H3BJY1|H3BJY1_MOUSE Synaptogyrin-2 OS=Mus musculus OX=10090 GN=Syngr2 PE=4 SV=1;>tr|H3BKF4|H3BKF4_MOUSE Predicted gene 20708 OS=Mus musculus OX=10090 GN=Gm20708 PE=4 SV=1;>tr|H3BIZ8|H3BIZ8_MOUSE Synaptogyrin 2, isoform CRA_b OS=Mus musculus OX=10090 GN	1	39.1	4.6893	4.065	0	0	0	0	0	0	229410	0	0	1108900	367070	0
tr|D3Z4L7|D3Z4L7_MOUSE	tr|D3Z4L7|D3Z4L7_MOUSE;tr|D3YVM8|D3YVM8_MOUSE;sp|O55102|BL1S1_MOUSE	>tr|D3Z4L7|D3Z4L7_MOUSE Biogenesis of lysosome-related organelles complex 1 subunit 1 OS=Mus musculus OX=10090 GN=Bloc1s1 PE=1 SV=1;>tr|D3YVM8|D3YVM8_MOUSE Biogenesis of lysosome-related organelles complex 1 subunit 1 OS=Mus musculus OX=10090 GN=Bloc1s1 PE	1	11.7	10.904	3.943	1	1	1	1	0	0	2257200	3652300	0	2930900	2034700	0
sp|O55106|STRN_MOUSE	sp|O55106|STRN_MOUSE;tr|F8WH41|F8WH41_MOUSE	>sp|O55106|STRN_MOUSE Striatin OS=Mus musculus OX=10090 GN=Strn PE=1 SV=2;>tr|F8WH41|F8WH41_MOUSE Striatin OS=Mus musculus OX=10090 GN=Strn PE=1 SV=1	13	28.7	85.965	71.511	12	14	14	14	15	15	6688700	5747700	5583700	9542800	8372800	8300200
sp|O55125|NIPS1_MOUSE	sp|O55125|NIPS1_MOUSE	>sp|O55125|NIPS1_MOUSE Protein NipSnap homolog 1 OS=Mus musculus OX=10090 GN=Nipsnap1 PE=1 SV=1	1	4.9	33.363	3.3982	0	1	0	2	1	1	0	3246800	1341700	1853400	1274100	1914200
tr|Q7TMG8|Q7TMG8_MOUSE	tr|Q7TMG8|Q7TMG8_MOUSE;sp|O55126|NIPS2_MOUSE	>tr|Q7TMG8|Q7TMG8_MOUSE Glioblastoma amplified sequence OS=Mus musculus OX=10090 GN=Nipsnap2 PE=1 SV=1;>sp|O55126|NIPS2_MOUSE Protein NipSnap homolog 2 OS=Mus musculus OX=10090 GN=Nipsnap2 PE=1 SV=1	2	8.9	32.898	5.5907	1	1	2	0	3	4	1646900	1533800	1411100	2284900	2798700	2845100
sp|O55131|SEPT7_MOUSE	sp|O55131|SEPT7_MOUSE;tr|E9Q9F5|E9Q9F5_MOUSE;tr|E9Q1G8|E9Q1G8_MOUSE	>sp|O55131|SEPT7_MOUSE Septin-7 OS=Mus musculus OX=10090 GN=Sept7 PE=1 SV=1;>tr|E9Q9F5|E9Q9F5_MOUSE Septin-7 OS=Mus musculus OX=10090 GN=Sept7 PE=1 SV=2;>tr|E9Q1G8|E9Q1G8_MOUSE Septin-7 OS=Mus musculus OX=10090 GN=Sept7 PE=1 SV=2	11	25	50.549	56.854	12	10	9	13	9	14	13988000	17685000	15309000	35579000	20278000	23571000
sp|O55135|IF6_MOUSE	sp|O55135|IF6_MOUSE;tr|A6PWZ2|A6PWZ2_MOUSE	>sp|O55135|IF6_MOUSE Eukaryotic translation initiation factor 6 OS=Mus musculus OX=10090 GN=Eif6 PE=1 SV=2;>tr|A6PWZ2|A6PWZ2_MOUSE Eukaryotic translation initiation factor 6 (Fragment) OS=Mus musculus OX=10090 GN=Eif6 PE=1 SV=1	3	21.2	26.511	68.465	5	5	9	7	8	7	17818000	23340000	22739000	59182000	15517000	20233000
sp|O55142|RL35A_MOUSE	sp|O55142|RL35A_MOUSE	>sp|O55142|RL35A_MOUSE 60S ribosomal protein L35a OS=Mus musculus OX=10090 GN=Rpl35a PE=1 SV=2	3	16.4	12.554	6.3824	2	2	2	1	1	1	6028100	6542600	6066400	5619300	7606100	4044900
sp|O55201|SPT5H_MOUSE	sp|O55201|SPT5H_MOUSE	>sp|O55201|SPT5H_MOUSE Transcription elongation factor SPT5 OS=Mus musculus OX=10090 GN=Supt5h PE=1 SV=1	24	28.9	120.66	323.31	24	25	26	33	29	34	13368000	12009000	11135000	16509000	16921000	17638000
sp|O55222|ILK_MOUSE	sp|O55222|ILK_MOUSE	>sp|O55222|ILK_MOUSE Integrin-linked protein kinase OS=Mus musculus OX=10090 GN=Ilk PE=1 SV=2	3	7.1	51.373	6.0821	2	3	0	1	0	0	398000	1151900	262220	315120	0	0
tr|A0A2R8VJW3|A0A2R8VJW3_MOUSE	tr|A0A2R8VJW3|A0A2R8VJW3_MOUSE;sp|O55229|CHKB_MOUSE	>tr|A0A2R8VJW3|A0A2R8VJW3_MOUSE Predicted readthrough transcript (NMD candidate), 44502 OS=Mus musculus OX=10090 GN=Gm44502 PE=4 SV=1;>sp|O55229|CHKB_MOUSE Choline/ethanolamine kinase OS=Mus musculus OX=10090 GN=Chkb PE=1 SV=3	1	10.6	19.619	5.825	0	1	0	1	0	0	0	0	0	754720	0	0
sp|O70172|PI42A_MOUSE	sp|O70172|PI42A_MOUSE;tr|F6RJE8|F6RJE8_MOUSE	>sp|O70172|PI42A_MOUSE Phosphatidylinositol 5-phosphate 4-kinase type-2 alpha OS=Mus musculus OX=10090 GN=Pip4k2a PE=1 SV=1;>tr|F6RJE8|F6RJE8_MOUSE Phosphatidylinositol 5-phosphate 4-kinase type-2 alpha (Fragment) OS=Mus musculus OX=10090 GN=Pip4k2a PE=1 S	2	13.3	46.151	13.251	3	5	4	1	4	1	3314000	3029500	3581500	2512800	3150000	2618500
sp|O70194|EIF3D_MOUSE	sp|O70194|EIF3D_MOUSE	>sp|O70194|EIF3D_MOUSE Eukaryotic translation initiation factor 3 subunit D OS=Mus musculus OX=10090 GN=Eif3d PE=1 SV=2	8	18.6	63.988	34.842	5	6	8	8	6	7	2282500	2814100	3033300	2567900	3251900	3577500
sp|O70230|ZN143_MOUSE	sp|O70230|ZN143_MOUSE	>sp|O70230|ZN143_MOUSE Zinc finger protein 143 OS=Mus musculus OX=10090 GN=Znf143 PE=1 SV=2	3	9.4	69.04	7.5181	2	2	1	3	3	2	474910	747220	464980	1046500	746150	897280
sp|O70251|EF1B_MOUSE	sp|O70251|EF1B_MOUSE;tr|A0A087WS46|A0A087WS46_MOUSE	>sp|O70251|EF1B_MOUSE Elongation factor 1-beta OS=Mus musculus OX=10090 GN=Eef1b PE=1 SV=5;>tr|A0A087WS46|A0A087WS46_MOUSE Eukaryotic translation elongation factor 1 beta 2 OS=Mus musculus OX=10090 GN=Eef1b2 PE=1 SV=1	5	38.7	24.693	114.82	4	8	4	7	5	5	44360000	27657000	25460000	76029000	26995000	61401000
tr|D3YX62|D3YX62_MOUSE	tr|D3YX62|D3YX62_MOUSE;sp|O70252|HMOX2_MOUSE	>tr|D3YX62|D3YX62_MOUSE Heme oxygenase 2 (Fragment) OS=Mus musculus OX=10090 GN=Hmox2 PE=1 SV=1;>sp|O70252|HMOX2_MOUSE Heme oxygenase 2 OS=Mus musculus OX=10090 GN=Hmox2 PE=1 SV=1	3	17.5	26.385	8.4492	0	1	4	2	0	0	1021800	2722500	2391600	2762000	1414900	1659600
sp|O70279|ESS2_MOUSE	sp|O70279|ESS2_MOUSE;tr|Q3UFM6|Q3UFM6_MOUSE	>sp|O70279|ESS2_MOUSE Splicing factor ESS-2 homolog OS=Mus musculus OX=10090 GN=Ess2 PE=1 SV=2;>tr|Q3UFM6|Q3UFM6_MOUSE Expressed sequence 2 embryonic lethal, isoform CRA_a OS=Mus musculus OX=10090 GN=Ess2 PE=1 SV=1	3	10.9	52.603	15.933	1	2	2	0	2	1	511980	872660	794880	0	644620	449930
tr|F7B6X4|F7B6X4_MOUSE	tr|F7B6X4|F7B6X4_MOUSE;tr|F6V8M6|F6V8M6_MOUSE;tr|F6U2C2|F6U2C2_MOUSE;sp|O70305|ATX2_MOUSE;tr|E9QM77|E9QM77_MOUSE	>tr|F7B6X4|F7B6X4_MOUSE Ataxin-2 (Fragment) OS=Mus musculus OX=10090 GN=Atxn2 PE=1 SV=1;>tr|F6V8M6|F6V8M6_MOUSE Ataxin-2 (Fragment) OS=Mus musculus OX=10090 GN=Atxn2 PE=1 SV=2;>tr|F6U2C2|F6U2C2_MOUSE Ataxin-2 (Fragment) OS=Mus musculus OX=10090 GN=Atxn2 PE	1	5.2	35.381	2.9932	0	0	1	1	0	2	0	179760	604240	0	414790	311980
sp|O70310|NMT1_MOUSE	sp|O70310|NMT1_MOUSE	>sp|O70310|NMT1_MOUSE Glycylpeptide N-tetradecanoyltransferase 1 OS=Mus musculus OX=10090 GN=Nmt1 PE=1 SV=1	3	7.7	56.888	6.4911	0	1	2	1	2	2	978140	1422200	1161200	1610300	1189200	1347500
tr|S4R1E5|S4R1E5_MOUSE	tr|S4R1E5|S4R1E5_MOUSE;sp|O70325|GPX4_MOUSE	>tr|S4R1E5|S4R1E5_MOUSE Glutathione peroxidase OS=Mus musculus OX=10090 GN=Gpx4 PE=1 SV=1;>sp|O70325|GPX4_MOUSE Phospholipid hydroperoxide glutathione peroxidase OS=Mus musculus OX=10090 GN=Gpx4 PE=1 SV=4	2	16.6	17.937	7.7877	4	4	2	3	5	4	5486200	7783600	2170700	7425200	5725000	6988000
sp|O70370|CATS_MOUSE	sp|O70370|CATS_MOUSE;tr|F6WR04|F6WR04_MOUSE	>sp|O70370|CATS_MOUSE Cathepsin S OS=Mus musculus OX=10090 GN=Ctss PE=1 SV=2;>tr|F6WR04|F6WR04_MOUSE Cathepsin S OS=Mus musculus OX=10090 GN=Ctss PE=1 SV=1	4	12.4	38.474	52.783	8	7	6	9	7	6	8664600	11598000	5129100	21166000	11773000	11818000
sp|O70400|PDLI1_MOUSE	sp|O70400|PDLI1_MOUSE;tr|S4R1V0|S4R1V0_MOUSE	>sp|O70400|PDLI1_MOUSE PDZ and LIM domain protein 1 OS=Mus musculus OX=10090 GN=Pdlim1 PE=1 SV=4;>tr|S4R1V0|S4R1V0_MOUSE PDZ and LIM domain protein 1 (Fragment) OS=Mus musculus OX=10090 GN=Pdlim1 PE=1 SV=1	11	50.2	35.774	195.65	23	20	22	25	26	19	38542000	49070000	49674000	63028000	60027000	55943000
sp|O70435|PSA3_MOUSE	sp|O70435|PSA3_MOUSE;tr|E0CX62|E0CX62_MOUSE	>sp|O70435|PSA3_MOUSE Proteasome subunit alpha type-3 OS=Mus musculus OX=10090 GN=Psma3 PE=1 SV=3;>tr|E0CX62|E0CX62_MOUSE Proteasome endopeptidase complex OS=Mus musculus OX=10090 GN=Psma3 PE=1 SV=2	10	43.9	28.405	126.62	18	20	17	15	21	19	51048000	53794000	27651000	61959000	33662000	49773000
tr|Q8BH40|Q8BH40_MOUSE	tr|Q8BH40|Q8BH40_MOUSE;sp|O70439|STX7_MOUSE	>tr|Q8BH40|Q8BH40_MOUSE Syntaxin-7 OS=Mus musculus OX=10090 GN=Stx7 PE=1 SV=1;>sp|O70439|STX7_MOUSE Syntaxin-7 OS=Mus musculus OX=10090 GN=Stx7 PE=1 SV=3	1	6.1	29.736	3.5539	0	0	0	0	0	1	197220	0	0	945680	0	1181200
sp|O70469|DOK2_MOUSE	sp|O70469|DOK2_MOUSE	>sp|O70469|DOK2_MOUSE Docking protein 2 OS=Mus musculus OX=10090 GN=Dok2 PE=1 SV=1	3	8	45.522	6.0913	4	0	1	0	0	0	1008400	1033900	546980	0	772340	0
tr|Q78ZM0|Q78ZM0_MOUSE	tr|Q78ZM0|Q78ZM0_MOUSE;sp|O70492|SNX3_MOUSE;tr|D3Z789|D3Z789_MOUSE;tr|D3Z6Z0|D3Z6Z0_MOUSE	>tr|Q78ZM0|Q78ZM0_MOUSE Sorting nexin 3, isoform CRA_b OS=Mus musculus OX=10090 GN=Snx3 PE=1 SV=1;>sp|O70492|SNX3_MOUSE Sorting nexin-3 OS=Mus musculus OX=10090 GN=Snx3 PE=1 SV=3;>tr|D3Z789|D3Z789_MOUSE Sorting nexin-3 OS=Mus musculus OX=10090 GN=Snx3 PE=1	5	32.7	18.762	14.737	6	7	6	5	7	4	12849000	14720000	14110000	14666000	14364000	13201000
sp|O70591|PFD2_MOUSE	sp|O70591|PFD2_MOUSE;tr|F8WJ30|F8WJ30_MOUSE	>sp|O70591|PFD2_MOUSE Prefoldin subunit 2 OS=Mus musculus OX=10090 GN=Pfdn2 PE=1 SV=2;>tr|F8WJ30|F8WJ30_MOUSE Prefoldin subunit 2 (Fragment) OS=Mus musculus OX=10090 GN=Pfdn2 PE=1 SV=1	4	32.5	16.534	111.25	8	7	6	4	5	5	12161000	13931000	23178000	18636000	16089000	15665000
sp|O88271|CFDP1_MOUSE	sp|O88271|CFDP1_MOUSE	>sp|O88271|CFDP1_MOUSE Craniofacial development protein 1 OS=Mus musculus OX=10090 GN=Cfdp1 PE=1 SV=1	4	19.3	32.921	20.487	6	6	7	7	7	7	19454000	13876000	15097000	22148000	18824000	27985000
tr|A0A0R4J098|A0A0R4J098_MOUSE	tr|A0A0R4J098|A0A0R4J098_MOUSE;sp|O88291|ZN326_MOUSE	>tr|A0A0R4J098|A0A0R4J098_MOUSE Zinc finger protein 326 OS=Mus musculus OX=10090 GN=Zfp326 PE=1 SV=1;>sp|O88291|ZN326_MOUSE DBIRD complex subunit ZNF326 OS=Mus musculus OX=10090 GN=Znf326 PE=1 SV=1	3	9	65.166	41.411	1	2	2	5	2	2	255540	342540	672700	862270	881390	876420
sp|O88342|WDR1_MOUSE	sp|O88342|WDR1_MOUSE	>sp|O88342|WDR1_MOUSE WD repeat-containing protein 1 OS=Mus musculus OX=10090 GN=Wdr1 PE=1 SV=3	25	58.7	66.406	246.29	44	60	50	67	47	61	76345000	104070000	122490000	115470000	103670000	121420000
tr|A0A0R4J0T4|A0A0R4J0T4_MOUSE	tr|A0A0R4J0T4|A0A0R4J0T4_MOUSE;tr|Q5D0E0|Q5D0E0_MOUSE;sp|O88351|IKKB_MOUSE	>tr|A0A0R4J0T4|A0A0R4J0T4_MOUSE Inhibitor of nuclear factor kappa-B kinase subunit beta OS=Mus musculus OX=10090 GN=Ikbkb PE=1 SV=1;>tr|Q5D0E0|Q5D0E0_MOUSE Ikbkb protein OS=Mus musculus OX=10090 GN=Ikbkb PE=1 SV=1;>sp|O88351|IKKB_MOUSE Inhibitor of nuclear	4	6.5	84.387	12.755	3	4	2	2	3	0	479100	784580	808450	388170	951570	883830
tr|A0A0R4J1C2|A0A0R4J1C2_MOUSE	tr|A0A0R4J1C2|A0A0R4J1C2_MOUSE;tr|A0A0R4IZW8|A0A0R4IZW8_MOUSE;sp|O88456|CPNS1_MOUSE	>tr|A0A0R4J1C2|A0A0R4J1C2_MOUSE Calpain small subunit 1 OS=Mus musculus OX=10090 GN=Capns1 PE=1 SV=1;>tr|A0A0R4IZW8|A0A0R4IZW8_MOUSE Calpain small subunit 1 OS=Mus musculus OX=10090 GN=Capns1 PE=1 SV=1;>sp|O88456|CPNS1_MOUSE Calpain small subunit 1 OS=Mus	5	22.5	22.924	34.918	3	3	5	3	2	3	13126000	15094000	13422000	16341000	17884000	14918000
sp|O88487|DC1I2_MOUSE	sp|O88487|DC1I2_MOUSE;tr|Q3TPJ8|Q3TPJ8_MOUSE;tr|A2BFF9|A2BFF9_MOUSE;tr|A2BFF8|A2BFF8_MOUSE;tr|A2BFF5|A2BFF5_MOUSE	>sp|O88487|DC1I2_MOUSE Cytoplasmic dynein 1 intermediate chain 2 OS=Mus musculus OX=10090 GN=Dync1i2 PE=1 SV=1;>tr|Q3TPJ8|Q3TPJ8_MOUSE Cytoplasmic dynein 1 intermediate chain 2 OS=Mus musculus OX=10090 GN=Dync1i2 PE=1 SV=1;>tr|A2BFF9|A2BFF9_MOUSE Cytoplasm	7	22.1	68.393	90.969	6	7	4	9	8	6	4252400	7438800	7655400	8177700	7224300	10420000
sp|O88512|AP1G2_MOUSE	sp|O88512|AP1G2_MOUSE;tr|D6RFT7|D6RFT7_MOUSE	>sp|O88512|AP1G2_MOUSE AP-1 complex subunit gamma-like 2 OS=Mus musculus OX=10090 GN=Ap1g2 PE=1 SV=2;>tr|D6RFT7|D6RFT7_MOUSE AP-1 complex subunit gamma-like 2 OS=Mus musculus OX=10090 GN=Ap1g2 PE=1 SV=1	3	3.7	87.862	7.2506	1	2	2	2	2	2	408120	216970	328410	283020	371980	499570
tr|Q8VC91|Q8VC91_MOUSE	tr|Q8VC91|Q8VC91_MOUSE;sp|O88522|NEMO_MOUSE;tr|E9Q2Y3|E9Q2Y3_MOUSE;tr|Q7TSS3|Q7TSS3_MOUSE;tr|A3KG44|A3KG44_MOUSE;tr|A3KG40|A3KG40_MOUSE;tr|A3KG41|A3KG41_MOUSE;tr|A3KG38|A3KG38_MOUSE	>tr|Q8VC91|Q8VC91_MOUSE Ikbkg protein OS=Mus musculus OX=10090 GN=Ikbkg PE=1 SV=1;>sp|O88522|NEMO_MOUSE NF-kappa-B essential modulator OS=Mus musculus OX=10090 GN=Ikbkg PE=1 SV=2;>tr|E9Q2Y3|E9Q2Y3_MOUSE NF-kappa-B essential modulator OS=Mus musculus OX=100	5	15.6	47.844	16.407	4	7	5	8	7	7	1795500	1934700	1096500	2298700	2404200	1394300
sp|O88531|PPT1_MOUSE	sp|O88531|PPT1_MOUSE	>sp|O88531|PPT1_MOUSE Palmitoyl-protein thioesterase 1 OS=Mus musculus OX=10090 GN=Ppt1 PE=1 SV=2	2	10.5	34.49	8.9105	1	3	3	2	1	4	2100200	2528300	2377900	3778000	2518200	3592900
tr|D3Z5G4|D3Z5G4_MOUSE	tr|D3Z5G4|D3Z5G4_MOUSE;sp|O88532|ZFR_MOUSE	>tr|D3Z5G4|D3Z5G4_MOUSE Zinc finger RNA-binding protein OS=Mus musculus OX=10090 GN=Zfr PE=1 SV=2;>sp|O88532|ZFR_MOUSE Zinc finger RNA-binding protein OS=Mus musculus OX=10090 GN=Zfr PE=1 SV=2	1	4.8	36.515	2.9408	1	0	0	1	1	1	1377500	1325700	1369300	752830	0	0
sp|O88543|CSN3_MOUSE	sp|O88543|CSN3_MOUSE	>sp|O88543|CSN3_MOUSE COP9 signalosome complex subunit 3 OS=Mus musculus OX=10090 GN=Cops3 PE=1 SV=3	4	11.8	47.832	13.42	4	3	2	4	2	3	2097300	3082700	1737100	2348300	3037500	3173000
sp|O88544|CSN4_MOUSE	sp|O88544|CSN4_MOUSE;tr|F6QTS1|F6QTS1_MOUSE;tr|D3Z1R9|D3Z1R9_MOUSE;tr|D3YV99|D3YV99_MOUSE	>sp|O88544|CSN4_MOUSE COP9 signalosome complex subunit 4 OS=Mus musculus OX=10090 GN=Cops4 PE=1 SV=1;>tr|F6QTS1|F6QTS1_MOUSE COP9 signalosome complex subunit 4 (Fragment) OS=Mus musculus OX=10090 GN=Cops4 PE=1 SV=1;>tr|D3Z1R9|D3Z1R9_MOUSE COP9 signalosome	10	34.5	46.284	40.988	8	7	8	6	7	12	6871200	6671200	5481700	7525000	7236000	8587100
tr|F6QK86|F6QK86_MOUSE	tr|F6QK86|F6QK86_MOUSE;tr|D3Z0F5|D3Z0F5_MOUSE;sp|O88545|CSN6_MOUSE	>tr|F6QK86|F6QK86_MOUSE COP9 signalosome complex subunit 6 (Fragment) OS=Mus musculus OX=10090 GN=Cops6 PE=1 SV=1;>tr|D3Z0F5|D3Z0F5_MOUSE COP9 signalosome complex subunit 6 OS=Mus musculus OX=10090 GN=Cops6 PE=1 SV=1;>sp|O88545|CSN6_MOUSE COP9 signalosome	3	37.7	13.462	8.1356	1	0	1	0	2	0	8252800	546210	545910	4271800	494450	693930
tr|D3YZC2|D3YZC2_MOUSE	tr|D3YZC2|D3YZC2_MOUSE;sp|O88559|MEN1_MOUSE;tr|F8WHD9|F8WHD9_MOUSE;tr|A0A0R4J1I3|A0A0R4J1I3_MOUSE	>tr|D3YZC2|D3YZC2_MOUSE Menin OS=Mus musculus OX=10090 GN=Men1 PE=1 SV=1;>sp|O88559|MEN1_MOUSE Menin OS=Mus musculus OX=10090 GN=Men1 PE=1 SV=2;>tr|F8WHD9|F8WHD9_MOUSE Menin OS=Mus musculus OX=10090 GN=Men1 PE=1 SV=1;>tr|A0A0R4J1I3|A0A0R4J1I3_MOUSE Menin O	1	2.8	63.751	3.3531	0	0	0	0	0	1	0	0	0	57503	0	205680
sp|O88569|ROA2_MOUSE	sp|O88569|ROA2_MOUSE	>sp|O88569|ROA2_MOUSE Heterogeneous nuclear ribonucleoproteins A2/B1 OS=Mus musculus OX=10090 GN=Hnrnpa2b1 PE=1 SV=2	19	47.6	37.402	323.31	79	91	90	104	100	110	616540000	727470000	650030000	1009900000	830960000	886160000
sp|O88587|COMT_MOUSE	sp|O88587|COMT_MOUSE;tr|D3Z227|D3Z227_MOUSE	>sp|O88587|COMT_MOUSE Catechol O-methyltransferase OS=Mus musculus OX=10090 GN=Comt PE=1 SV=2;>tr|D3Z227|D3Z227_MOUSE Catechol O-methyltransferase (Fragment) OS=Mus musculus OX=10090 GN=Comt PE=1 SV=1	2	8.3	29.486	3.5548	1	1	0	0	0	2	1375500	796750	444090	906640	1169700	1578300
sp|O88653|LTOR3_MOUSE	sp|O88653|LTOR3_MOUSE;tr|A0A0G2JGQ3|A0A0G2JGQ3_MOUSE	>sp|O88653|LTOR3_MOUSE Ragulator complex protein LAMTOR3 OS=Mus musculus OX=10090 GN=Lamtor3 PE=1 SV=1;>tr|A0A0G2JGQ3|A0A0G2JGQ3_MOUSE Ragulator complex protein LAMTOR3 (Fragment) OS=Mus musculus OX=10090 GN=Lamtor3 PE=1 SV=1	2	28.2	13.553	6.5627	0	1	0	1	0	0	15992000	11785000	6845200	18059000	11977000	13349000
sp|O88665|BRD7_MOUSE	sp|O88665|BRD7_MOUSE	>sp|O88665|BRD7_MOUSE Bromodomain-containing protein 7 OS=Mus musculus OX=10090 GN=Brd7 PE=1 SV=1	1	2.6	73.999	3.3334	0	0	1	0	2	1	0	0	124310	199230	246140	0
sp|O88673|DGKA_MOUSE	sp|O88673|DGKA_MOUSE;tr|R4I5B2|R4I5B2_MOUSE	>sp|O88673|DGKA_MOUSE Diacylglycerol kinase alpha OS=Mus musculus OX=10090 GN=Dgka PE=1 SV=2;>tr|R4I5B2|R4I5B2_MOUSE Diacylglycerol kinase alpha OS=Mus musculus OX=10090 GN=Dgka PE=1 SV=1	4	6.3	82.761	11.826	2	1	3	4	5	3	1267200	1494200	1305500	1271400	1192600	341130
tr|A2AGN7|A2AGN7_MOUSE	tr|A2AGN7|A2AGN7_MOUSE;sp|O88685|PRS6A_MOUSE;tr|B7ZCF1|B7ZCF1_MOUSE;tr|A0A087WPH7|A0A087WPH7_MOUSE	>tr|A2AGN7|A2AGN7_MOUSE 26S proteasome regulatory subunit 6A OS=Mus musculus OX=10090 GN=Psmc3 PE=1 SV=1;>sp|O88685|PRS6A_MOUSE 26S proteasome regulatory subunit 6A OS=Mus musculus OX=10090 GN=Psmc3 PE=1 SV=2;>tr|B7ZCF1|B7ZCF1_MOUSE 26S proteasome regulato	16	46.8	44.669	92.845	19	22	22	23	22	25	13206000	14409000	16814000	22734000	14505000	17776000
sp|O88696|CLPP_MOUSE	sp|O88696|CLPP_MOUSE	>sp|O88696|CLPP_MOUSE ATP-dependent Clp protease proteolytic subunit, mitochondrial OS=Mus musculus OX=10090 GN=Clpp PE=1 SV=1	4	22.1	29.8	14.957	4	1	2	3	5	2	5082700	3716900	6291600	8271800	7346500	7216200
tr|A0A0J9YU62|A0A0J9YU62_MOUSE	tr|A0A0J9YU62|A0A0J9YU62_MOUSE;sp|O88712|CTBP1_MOUSE;tr|A0A0J9YUM4|A0A0J9YUM4_MOUSE;tr|A0A0J9YTW3|A0A0J9YTW3_MOUSE	>tr|A0A0J9YU62|A0A0J9YU62_MOUSE C-terminal-binding protein 1 OS=Mus musculus OX=10090 GN=Ctbp1 PE=1 SV=1;>sp|O88712|CTBP1_MOUSE C-terminal-binding protein 1 OS=Mus musculus OX=10090 GN=Ctbp1 PE=1 SV=2;>tr|A0A0J9YUM4|A0A0J9YUM4_MOUSE C-terminal-binding prot	6	14.7	46.527	19.904	6	7	4	5	4	6	5087300	4695600	3418200	5984500	3843900	5297200
sp|O88796|RPP30_MOUSE	sp|O88796|RPP30_MOUSE	>sp|O88796|RPP30_MOUSE Ribonuclease P protein subunit p30 OS=Mus musculus OX=10090 GN=Rpp30 PE=1 SV=1	1	3.4	29.473	2.7712	1	0	1	1	0	1	201690	19911	175750	192490	0	182640
sp|O88811|STAM2_MOUSE	sp|O88811|STAM2_MOUSE	>sp|O88811|STAM2_MOUSE Signal transducing adapter molecule 2 OS=Mus musculus OX=10090 GN=Stam2 PE=1 SV=1	3	8.4	57.454	9.0805	2	3	3	2	1	2	1362600	1460700	1240000	1287500	1469100	1657200
tr|A0A0R4J1D9|A0A0R4J1D9_MOUSE	tr|A0A0R4J1D9|A0A0R4J1D9_MOUSE;tr|Q3TNB8|Q3TNB8_MOUSE;sp|O88842|FGD3_MOUSE	>tr|A0A0R4J1D9|A0A0R4J1D9_MOUSE FYVE, RhoGEF and PH domain-containing protein 3 OS=Mus musculus OX=10090 GN=Fgd3 PE=1 SV=1;>tr|Q3TNB8|Q3TNB8_MOUSE FYVE, RhoGEF and PH domain containing 3, isoform CRA_b OS=Mus musculus OX=10090 GN=Fgd3 PE=1 SV=1;>sp|O88842|	3	7.5	58.8	8.3284	1	2	2	1	5	2	182570	424800	275940	1102700	1407600	724890
sp|O88844|IDHC_MOUSE	sp|O88844|IDHC_MOUSE;tr|A0A087WPT4|A0A087WPT4_MOUSE;tr|A0A087WRS9|A0A087WRS9_MOUSE	>sp|O88844|IDHC_MOUSE Isocitrate dehydrogenase [NADP] cytoplasmic OS=Mus musculus OX=10090 GN=Idh1 PE=1 SV=2;>tr|A0A087WPT4|A0A087WPT4_MOUSE Isocitrate dehydrogenase [NADP] cytoplasmic (Fragment) OS=Mus musculus OX=10090 GN=Idh1 PE=1 SV=1;>tr|A0A087WRS9|A0	4	15.7	46.674	9.4006	1	0	2	1	2	3	732240	558410	665070	551990	1324700	1386300
sp|O88874|CCNK_MOUSE	sp|O88874|CCNK_MOUSE;tr|Q3U3M5|Q3U3M5_MOUSE	>sp|O88874|CCNK_MOUSE Cyclin-K OS=Mus musculus OX=10090 GN=Ccnk PE=1 SV=3;>tr|Q3U3M5|Q3U3M5_MOUSE Cyclin-K OS=Mus musculus OX=10090 GN=Ccnk PE=1 SV=1	2	7.8	61.363	8.4556	0	2	0	2	2	2	462180	432690	559500	1043100	371990	642270
sp|O88890|SH21A_MOUSE	sp|O88890|SH21A_MOUSE	>sp|O88890|SH21A_MOUSE SH2 domain-containing protein 1A OS=Mus musculus OX=10090 GN=Sh2d1a PE=1 SV=1	5	53.2	13.904	23.201	4	2	6	5	2	3	15489000	12769000	15659000	18661000	13651000	17399000
sp|O88952|LIN7C_MOUSE	sp|O88952|LIN7C_MOUSE;tr|Q3TUM0|Q3TUM0_MOUSE;sp|O88951|LIN7B_MOUSE;sp|Q8JZS0|LIN7A_MOUSE	>sp|O88952|LIN7C_MOUSE Protein lin-7 homolog C OS=Mus musculus OX=10090 GN=Lin7c PE=1 SV=2;>tr|Q3TUM0|Q3TUM0_MOUSE MCG16980, isoform CRA_b OS=Mus musculus OX=10090 GN=Lin7a PE=1 SV=1;>sp|O88951|LIN7B_MOUSE Protein lin-7 homolog B OS=Mus musculus OX=10090 G	2	14.7	21.834	2.8768	0	0	0	0	1	1	58880	0	0	69207	0	424650
tr|A0A2R8VHE4|A0A2R8VHE4_MOUSE	tr|A0A2R8VHE4|A0A2R8VHE4_MOUSE;tr|E9PWY6|E9PWY6_MOUSE;sp|O88986|KBL_MOUSE	>tr|A0A2R8VHE4|A0A2R8VHE4_MOUSE 2-amino-3-ketobutyrate coenzyme A ligase, mitochondrial (Fragment) OS=Mus musculus OX=10090 GN=Gcat PE=1 SV=1;>tr|E9PWY6|E9PWY6_MOUSE 2-amino-3-ketobutyrate coenzyme A ligase, mitochondrial OS=Mus musculus OX=10090 GN=Gcat P	1	4.4	24.308	2.9163	0	0	1	1	2	0	0	0	0	1231600	689380	0
sp|O89023|TPP1_MOUSE	sp|O89023|TPP1_MOUSE	>sp|O89023|TPP1_MOUSE Tripeptidyl-peptidase 1 OS=Mus musculus OX=10090 GN=Tpp1 PE=1 SV=2	2	6.2	61.341	10.416	3	3	3	2	3	2	4355500	3984800	4437000	4827400	4285000	5446600
sp|O89053|COR1A_MOUSE	sp|O89053|COR1A_MOUSE;tr|G3UYK8|G3UYK8_MOUSE	>sp|O89053|COR1A_MOUSE Coronin-1A OS=Mus musculus OX=10090 GN=Coro1a PE=1 SV=5;>tr|G3UYK8|G3UYK8_MOUSE Coronin OS=Mus musculus OX=10090 GN=Coro1a PE=1 SV=1	23	44.3	50.989	323.31	73	74	79	71	82	96	764130000	892730000	766810000	1008400000	926110000	1156600000
tr|D3Z315|D3Z315_MOUSE	tr|D3Z315|D3Z315_MOUSE;sp|O89079|COPE_MOUSE	>tr|D3Z315|D3Z315_MOUSE Coatomer subunit epsilon (Fragment) OS=Mus musculus OX=10090 GN=Cope PE=1 SV=1;>sp|O89079|COPE_MOUSE Coatomer subunit epsilon OS=Mus musculus OX=10090 GN=Cope PE=1 SV=3	6	37.4	25.37	65.176	9	9	9	9	10	9	10056000	13896000	12573000	33431000	20385000	16357000
sp|O89086|RBM3_MOUSE	sp|O89086|RBM3_MOUSE;tr|Q8BG13|Q8BG13_MOUSE;tr|S4R2M6|S4R2M6_MOUSE	>sp|O89086|RBM3_MOUSE RNA-binding protein 3 OS=Mus musculus OX=10090 GN=Rbm3 PE=1 SV=1;>tr|Q8BG13|Q8BG13_MOUSE RNA-binding protein 3 OS=Mus musculus OX=10090 GN=Rbm3 PE=1 SV=1;>tr|S4R2M6|S4R2M6_MOUSE MCG116386, isoform CRA_c OS=Mus musculus OX=10090 GN=Rbm	2	20.9	16.604	72.946	9	17	13	14	15	15	204370000	273100000	253420000	373280000	337730000	316320000
tr|G3X8Q0|G3X8Q0_MOUSE	tr|G3X8Q0|G3X8Q0_MOUSE;sp|O89090|SP1_MOUSE	>tr|G3X8Q0|G3X8Q0_MOUSE Trans-acting transcription factor 1 OS=Mus musculus OX=10090 GN=Sp1 PE=1 SV=1;>sp|O89090|SP1_MOUSE Transcription factor Sp1 OS=Mus musculus OX=10090 GN=Sp1 PE=1 SV=2	2	5.5	80.443	37.392	1	1	1	1	0	1	9834700	8884300	10543000	16052000	12141000	12343000
sp|O89100|GRAP2_MOUSE	sp|O89100|GRAP2_MOUSE	>sp|O89100|GRAP2_MOUSE GRB2-related adaptor protein 2 OS=Mus musculus OX=10090 GN=Grap2 PE=1 SV=1	10	43.5	36.81	195.14	15	14	18	18	21	24	28035000	26794000	29812000	41917000	35517000	40461000
sp|O89110|CASP8_MOUSE	sp|O89110|CASP8_MOUSE;tr|A0A087WQT6|A0A087WQT6_MOUSE	>sp|O89110|CASP8_MOUSE Caspase-8 OS=Mus musculus OX=10090 GN=Casp8 PE=1 SV=1;>tr|A0A087WQT6|A0A087WQT6_MOUSE Caspase-8 OS=Mus musculus OX=10090 GN=Casp8 PE=1 SV=1	11	30	55.356	86.247	13	16	13	13	14	14	21739000	13224000	8838500	14411000	11333000	14126000
tr|B2KGR2|B2KGR2_MOUSE	tr|B2KGR2|B2KGR2_MOUSE;sp|O89112|LANC1_MOUSE	>tr|B2KGR2|B2KGR2_MOUSE Glutathione S-transferase LANCL1 (Fragment) OS=Mus musculus OX=10090 GN=Lancl1 PE=1 SV=1;>sp|O89112|LANC1_MOUSE Glutathione S-transferase LANCL1 OS=Mus musculus OX=10090 GN=Lancl1 PE=1 SV=1	1	6.9	19.656	4.3281	1	1	0	0	1	0	1012500	1110400	1308700	1092100	2348800	1425300
sp|P00375|DYR_MOUSE	sp|P00375|DYR_MOUSE	>sp|P00375|DYR_MOUSE Dihydrofolate reductase OS=Mus musculus OX=10090 GN=Dhfr PE=1 SV=3	4	21.4	21.606	9.775	3	2	3	2	3	3	3544900	3289000	3137500	4417800	3566700	2535700
sp|P00405|COX2_MOUSE	sp|P00405|COX2_MOUSE	>sp|P00405|COX2_MOUSE Cytochrome c oxidase subunit 2 OS=Mus musculus OX=10090 GN=Mtco2 PE=1 SV=1	1	4.4	25.976	3.3412	2	2	2	2	2	2	2339100	1371000	1331900	3721800	1932400	1815000
sp|P00493|HPRT_MOUSE	sp|P00493|HPRT_MOUSE	>sp|P00493|HPRT_MOUSE Hypoxanthine-guanine phosphoribosyltransferase OS=Mus musculus OX=10090 GN=Hprt1 PE=1 SV=3	7	35.3	24.57	23.217	6	7	7	13	8	11	10293000	8350700	10163000	12674000	7560300	12935000
sp|P00920|CAH2_MOUSE	sp|P00920|CAH2_MOUSE	>sp|P00920|CAH2_MOUSE Carbonic anhydrase 2 OS=Mus musculus OX=10090 GN=Ca2 PE=1 SV=4	5	36.2	29.032	49.829	1	3	2	5	8	9	3342400	4229200	4126000	6074100	8060800	10977000
sp|P01592|IGJ_MOUSE	sp|P01592|IGJ_MOUSE	>sp|P01592|IGJ_MOUSE Immunoglobulin J chain OS=Mus musculus OX=10090 GN=Jchain PE=1 SV=4	1	9.4	18.013	3.636	0	0	0	0	0	1	0	0	0	0	0	3278700
sp|P01631|KV2A7_MOUSE	sp|P01631|KV2A7_MOUSE;tr|A0A140T8M9|A0A140T8M9_MOUSE;tr|A0A140T8M0|A0A140T8M0_MOUSE;tr|A0A0B4J1I0|A0A0B4J1I0_MOUSE;tr|A0A075B5N0|A0A075B5N0_MOUSE;tr|A0A075B5K8|A0A075B5K8_MOUSE;tr|F6XWB2|F6XWB2_MOUSE;tr|A0A140T8N1|A0A140T8N1_MOUSE;tr|A0A0G2JDE5|A0A0G2JDE5_MOUSE	>sp|P01631|KV2A7_MOUSE Ig kappa chain V-II region 26-10 OS=Mus musculus OX=10090 PE=1 SV=1;>tr|A0A140T8M9|A0A140T8M9_MOUSE Immunoglobulin kappa chain variable 1-122 (Fragment) OS=Mus musculus OX=10090 GN=Igkv1-122 PE=4 SV=2;>tr|A0A140T8M0|A0A140T8M0_MOUSE	1	11.5	12.273	12.348	2	2	2	2	2	3	20055000	26248000	10638000	45516000	29912000	37918000
tr|A0A075B663|A0A075B663_MOUSE	tr|A0A075B663|A0A075B663_MOUSE;sp|P01723|LV1A_MOUSE;sp|P01727|LV1E_MOUSE;tr|A0A075B664|A0A075B664_MOUSE;sp|P01728|LV2A_MOUSE;sp|P01729|LV2B_MOUSE;sp|P01726|LV1D_MOUSE	>tr|A0A075B663|A0A075B663_MOUSE Immunoglobulin lambda variable 1 (Fragment) OS=Mus musculus OX=10090 GN=Iglv1 PE=4 SV=1;>sp|P01723|LV1A_MOUSE Ig lambda-1 chain V region OS=Mus musculus OX=10090 PE=1 SV=2;>sp|P01727|LV1E_MOUSE Ig lambda-1 chain V region S43	2	35.9	12.312	9.8383	2	2	2	5	2	4	83525000	62760000	53054000	117540000	91842000	97027000
tr|A0A1L1SUX8|A0A1L1SUX8_MOUSE	tr|A0A1L1SUX8|A0A1L1SUX8_MOUSE;sp|P01831|THY1_MOUSE	>tr|A0A1L1SUX8|A0A1L1SUX8_MOUSE Thy-1 membrane glycoprotein (Fragment) OS=Mus musculus OX=10090 GN=Thy1 PE=1 SV=1;>sp|P01831|THY1_MOUSE Thy-1 membrane glycoprotein OS=Mus musculus OX=10090 GN=Thy1 PE=1 SV=1	4	32	14.038	32.512	7	6	10	6	7	5	29057000	43205000	42213000	53087000	48944000	71672000
sp|P01837|IGKC_MOUSE	sp|P01837|IGKC_MOUSE	>sp|P01837|IGKC_MOUSE Immunoglobulin kappa constant OS=Mus musculus OX=10090 GN=Igkc PE=1 SV=2	2	17.8	11.934	15.316	2	1	1	1	2	3	9658400	12164000	8333900	26193000	6470000	11701000
sp|P01843|LAC1_MOUSE	sp|P01843|LAC1_MOUSE;tr|A0A0G2JE99|A0A0G2JE99_MOUSE	>sp|P01843|LAC1_MOUSE Ig lambda-1 chain C region OS=Mus musculus OX=10090 PE=1 SV=1;>tr|A0A0G2JE99|A0A0G2JE99_MOUSE Immunoglobulin lambda constant 1 (Fragment) OS=Mus musculus OX=10090 GN=Iglc1 PE=4 SV=1	5	50.5	11.575	72.935	21	27	25	25	33	23	545550000	680090000	748270000	1041600000	745450000	1106700000
tr|A0A075B662|A0A075B662_MOUSE	tr|A0A075B662|A0A075B662_MOUSE;sp|P01849|TCA_MOUSE	>tr|A0A075B662|A0A075B662_MOUSE T cell receptor alpha constant OS=Mus musculus OX=10090 GN=Trac PE=4 SV=1;>sp|P01849|TCA_MOUSE T-cell receptor alpha chain C region OS=Mus musculus OX=10090 GN=Tcra PE=1 SV=1	2	12.4	15.234	4.2412	1	1	1	1	1	3	2609700	2628000	2800100	3610500	2799400	6627100
sp|P01887|B2MG_MOUSE	sp|P01887|B2MG_MOUSE	>sp|P01887|B2MG_MOUSE Beta-2-microglobulin OS=Mus musculus OX=10090 GN=B2m PE=1 SV=2	3	22.7	13.779	16.815	6	7	4	6	5	4	149180000	148950000	129730000	162320000	170310000	172590000
sp|P01899|HA11_MOUSE	sp|P01899|HA11_MOUSE;sp|P01897|HA1L_MOUSE	>sp|P01899|HA11_MOUSE H-2 class I histocompatibility antigen, D-B alpha chain OS=Mus musculus OX=10090 GN=H2-D1 PE=1 SV=2;>sp|P01897|HA1L_MOUSE H-2 class I histocompatibility antigen, L-D alpha chain OS=Mus musculus OX=10090 GN=H2-L PE=1 SV=2	8	41.4	40.836	147.35	19	18	22	18	21	22	39970000	47495000	28974000	57110000	31656000	38886000
sp|P01901|HA1B_MOUSE	sp|P01901|HA1B_MOUSE;tr|Q3TH01|Q3TH01_MOUSE;tr|G3UXW2|G3UXW2_MOUSE	>sp|P01901|HA1B_MOUSE H-2 class I histocompatibility antigen, K-B alpha chain OS=Mus musculus OX=10090 GN=H2-K1 PE=1 SV=1;>tr|Q3TH01|Q3TH01_MOUSE H-2 class I histocompatibility antigen, K-K alpha chain OS=Mus musculus OX=10090 GN=H2-K1 PE=1 SV=1;>tr|G3UXW2	2	32	41.301	116.72	11	13	14	16	15	15	14287000	22883000	12362000	35479000	26323000	28739000
tr|Q91VB8|Q91VB8_MOUSE	tr|Q91VB8|Q91VB8_MOUSE;sp|P01942|HBA_MOUSE	>tr|Q91VB8|Q91VB8_MOUSE Alpha globin 1 OS=Mus musculus OX=10090 GN=Hba-a1 PE=1 SV=1;>sp|P01942|HBA_MOUSE Hemoglobin subunit alpha OS=Mus musculus OX=10090 GN=Hba PE=1 SV=2	4	43	15.112	20.663	11	11	12	1	4	5	75258000	61660000	255740000	16370000	13225000	18668000
tr|F8WI35|F8WI35_MOUSE	tr|F8WI35|F8WI35_MOUSE;sp|P84244|H33_MOUSE;sp|P84228|H32_MOUSE;sp|P68433|H31_MOUSE;sp|P02301|H3C_MOUSE;tr|A0A1W2P768|A0A1W2P768_MOUSE;tr|E0CZ27|E0CZ27_MOUSE	>tr|F8WI35|F8WI35_MOUSE Histone H3 OS=Mus musculus OX=10090 GN=H3f3a PE=1 SV=1;>sp|P84244|H33_MOUSE Histone H3.3 OS=Mus musculus OX=10090 GN=H3f3a PE=1 SV=2;>sp|P84228|H32_MOUSE Histone H3.2 OS=Mus musculus OX=10090 GN=Hist1h3b PE=1 SV=2;>sp|P68433|H31_MOU	8	36.3	15.199	64.281	12	19	24	12	13	10	2707700000	4226800000	2820000000	603430000	857430000	724830000
sp|P03930|ATP8_MOUSE	sp|P03930|ATP8_MOUSE	>sp|P03930|ATP8_MOUSE ATP synthase protein 8 OS=Mus musculus OX=10090 GN=Mtatp8 PE=1 SV=1	2	26.9	7.7662	2.9585	1	0	1	0	0	0	2713300	57590000	3564100	46001000	3634700	27276000
sp|P03958|ADA_MOUSE	sp|P03958|ADA_MOUSE	>sp|P03958|ADA_MOUSE Adenosine deaminase OS=Mus musculus OX=10090 GN=Ada PE=1 SV=3	8	29.8	39.991	28.333	5	9	5	6	8	7	4166200	7549300	5120400	4326400	4905000	6018500
sp|P04223|HA1K_MOUSE	sp|P04223|HA1K_MOUSE	>sp|P04223|HA1K_MOUSE H-2 class I histocompatibility antigen, K-K alpha chain OS=Mus musculus OX=10090 GN=H2-K1 PE=1 SV=1	0	19.5	41.646	2.6378	0	0	2	0	0	0	503270	0	826760	181310	0	0
sp|P04235|CD3D_MOUSE	sp|P04235|CD3D_MOUSE	>sp|P04235|CD3D_MOUSE T-cell surface glycoprotein CD3 delta chain OS=Mus musculus OX=10090 GN=Cd3d PE=1 SV=1	2	9.8	19.032	5.2902	0	2	1	2	1	1	1467800	1441500	1487600	1073800	0	1885600
tr|F6TYB7|F6TYB7_MOUSE	tr|F6TYB7|F6TYB7_MOUSE;sp|P04370|MBP_MOUSE;tr|F6RWW8|F6RWW8_MOUSE;tr|F6ZIA4|F6ZIA4_MOUSE;tr|F6VME3|F6VME3_MOUSE;tr|F7A0B0|F7A0B0_MOUSE;tr|F6RT34|F6RT34_MOUSE	>tr|F6TYB7|F6TYB7_MOUSE Myelin basic protein (Fragment) OS=Mus musculus OX=10090 GN=Mbp PE=1 SV=1;>sp|P04370|MBP_MOUSE Myelin basic protein OS=Mus musculus OX=10090 GN=Mbp PE=1 SV=2;>tr|F6RWW8|F6RWW8_MOUSE Myelin basic protein (Fragment) OS=Mus musculus OX	5	34.6	21.069	15.332	6	5	4	6	5	3	11604000	17021000	10368000	14883000	9969500	6273600
sp|P05064|ALDOA_MOUSE	sp|P05064|ALDOA_MOUSE;tr|A6ZI44|A6ZI44_MOUSE;tr|D3Z510|D3Z510_MOUSE;tr|A0A0U1RPN8|A0A0U1RPN8_MOUSE;tr|D3YWI1|D3YWI1_MOUSE;tr|Q9CPQ9|Q9CPQ9_MOUSE;tr|A6ZI46|A6ZI46_MOUSE	>sp|P05064|ALDOA_MOUSE Fructose-bisphosphate aldolase A OS=Mus musculus OX=10090 GN=Aldoa PE=1 SV=2;>tr|A6ZI44|A6ZI44_MOUSE Fructose-bisphosphate aldolase OS=Mus musculus OX=10090 GN=Aldoa PE=1 SV=1;>tr|D3Z510|D3Z510_MOUSE Fructose-bisphosphate aldolase A	16	57.1	39.355	323.31	37	38	41	42	44	46	143060000	123430000	89338000	146370000	186550000	120350000
sp|P05201|AATC_MOUSE	sp|P05201|AATC_MOUSE	>sp|P05201|AATC_MOUSE Aspartate aminotransferase, cytoplasmic OS=Mus musculus OX=10090 GN=Got1 PE=1 SV=3	11	30.3	46.247	56.324	6	12	15	9	5	8	10142000	11076000	18203000	11925000	12205000	10104000
sp|P05202|AATM_MOUSE	sp|P05202|AATM_MOUSE	>sp|P05202|AATM_MOUSE Aspartate aminotransferase, mitochondrial OS=Mus musculus OX=10090 GN=Got2 PE=1 SV=1	11	26.5	47.411	119.64	10	13	9	7	10	11	19378000	17292000	13643000	24738000	16649000	23981000
sp|P05213|TBA1B_MOUSE	sp|P05213|TBA1B_MOUSE	>sp|P05213|TBA1B_MOUSE Tubulin alpha-1B chain OS=Mus musculus OX=10090 GN=Tuba1b PE=1 SV=2	0	54.3	50.151	323.31	59	74	76	86	81	81	188780000	215510000	179080000	329590000	216480000	245670000
sp|P05366|SAA1_MOUSE	sp|P05366|SAA1_MOUSE	>sp|P05366|SAA1_MOUSE Serum amyloid A-1 protein OS=Mus musculus OX=10090 GN=Saa1 PE=1 SV=2	1	7.4	13.77	2.6257	2	1	1	0	0	0	1232000	1276800	1643600	0	0	0
tr|A0A087WRZ7|A0A087WRZ7_MOUSE	tr|A0A087WRZ7|A0A087WRZ7_MOUSE;tr|A0A0G2JDM3|A0A0G2JDM3_MOUSE;tr|E9PWG4|E9PWG4_MOUSE;tr|A0A0G2JDW2|A0A0G2JDW2_MOUSE;sp|P05977|MYL1_MOUSE;sp|P09542|MYL3_MOUSE	>tr|A0A087WRZ7|A0A087WRZ7_MOUSE Myosin light chain 1/3, skeletal muscle isoform OS=Mus musculus OX=10090 GN=Myl1 PE=1 SV=1;>tr|A0A0G2JDM3|A0A0G2JDM3_MOUSE Myosin light chain 3 OS=Mus musculus OX=10090 GN=Myl3 PE=1 SV=1;>tr|E9PWG4|E9PWG4_MOUSE Myosin light	1	17.4	10.301	3.4124	1	1	1	2	2	0	3969500	3409800	1371300	5616400	4922500	2160700
tr|Q564E2|Q564E2_MOUSE	tr|Q564E2|Q564E2_MOUSE;sp|P06151|LDHA_MOUSE;tr|A0A1B0GSX0|A0A1B0GSX0_MOUSE;tr|A0A1B0GSR9|A0A1B0GSR9_MOUSE;tr|D3YZQ9|D3YZQ9_MOUSE;tr|A0A1B0GT41|A0A1B0GT41_MOUSE;tr|A0A1B0GQX5|A0A1B0GQX5_MOUSE;tr|A0A1B0GSL7|A0A1B0GSL7_MOUSE	>tr|Q564E2|Q564E2_MOUSE L-lactate dehydrogenase OS=Mus musculus OX=10090 GN=Ldha PE=1 SV=1;>sp|P06151|LDHA_MOUSE L-lactate dehydrogenase A chain OS=Mus musculus OX=10090 GN=Ldha PE=1 SV=3;>tr|A0A1B0GSX0|A0A1B0GSX0_MOUSE L-lactate dehydrogenase OS=Mus muscu	18	47	36.498	249.6	33	33	35	33	29	39	138950000	168070000	146670000	194910000	156300000	184290000
sp|P06240|LCK_MOUSE	sp|P06240|LCK_MOUSE;tr|E9Q696|E9Q696_MOUSE	>sp|P06240|LCK_MOUSE Proto-oncogene tyrosine-protein kinase LCK OS=Mus musculus OX=10090 GN=Lck PE=1 SV=4;>tr|E9Q696|E9Q696_MOUSE Tyrosine-protein kinase OS=Mus musculus OX=10090 GN=Lck PE=1 SV=1	10	27.1	57.942	32.946	10	9	6	9	10	12	4078700	4423000	4175700	6509700	5285100	6286300
sp|P06745|G6PI_MOUSE	sp|P06745|G6PI_MOUSE	>sp|P06745|G6PI_MOUSE Glucose-6-phosphate isomerase OS=Mus musculus OX=10090 GN=Gpi PE=1 SV=4	7	28.1	62.766	61.482	16	17	14	18	19	19	15204000	15953000	13385000	22024000	17051000	19783000
tr|S4R1M0|S4R1M0_MOUSE	tr|S4R1M0|S4R1M0_MOUSE;sp|P06800|PTPRC_MOUSE	>tr|S4R1M0|S4R1M0_MOUSE Receptor-type tyrosine-protein phosphatase C OS=Mus musculus OX=10090 GN=Ptprc PE=1 SV=1;>sp|P06800|PTPRC_MOUSE Receptor-type tyrosine-protein phosphatase C OS=Mus musculus OX=10090 GN=Ptprc PE=1 SV=4	15	17.4	128.57	74.166	18	15	12	20	19	15	3978700	5399600	4321800	6759800	6862400	5743400
tr|A0A0G2JGD2|A0A0G2JGD2_MOUSE	tr|A0A0G2JGD2|A0A0G2JGD2_MOUSE;sp|P07091|S10A4_MOUSE	>tr|A0A0G2JGD2|A0A0G2JGD2_MOUSE Protein S100-A4 (Fragment) OS=Mus musculus OX=10090 GN=S100a4 PE=1 SV=1;>sp|P07091|S10A4_MOUSE Protein S100-A4 OS=Mus musculus OX=10090 GN=S100a4 PE=1 SV=1	5	46.2	9.0621	15.173	6	4	6	7	6	6	33932000	71722000	34640000	68989000	78637000	80120000
sp|P07309|TTHY_MOUSE	sp|P07309|TTHY_MOUSE	>sp|P07309|TTHY_MOUSE Transthyretin OS=Mus musculus OX=10090 GN=Ttr PE=1 SV=1	1	8.8	15.776	4.5284	1	1	1	1	1	0	4264600	5623400	4197900	5395600	4577100	9284500
sp|P07356|ANXA2_MOUSE	sp|P07356|ANXA2_MOUSE;tr|B0V2N7|B0V2N7_MOUSE;tr|B0V2N8|B0V2N8_MOUSE;tr|B0V2N5|B0V2N5_MOUSE	>sp|P07356|ANXA2_MOUSE Annexin A2 OS=Mus musculus OX=10090 GN=Anxa2 PE=1 SV=2;>tr|B0V2N7|B0V2N7_MOUSE Annexin (Fragment) OS=Mus musculus OX=10090 GN=Anxa2 PE=1 SV=1;>tr|B0V2N8|B0V2N8_MOUSE Annexin (Fragment) OS=Mus musculus OX=10090 GN=Anxa2 PE=1 SV=1;>tr|	16	50.7	38.676	57.867	16	17	17	14	16	12	10421000	16408000	9340900	11931000	9848900	10816000
tr|A0A0G2JGG2|A0A0G2JGG2_MOUSE	tr|A0A0G2JGG2|A0A0G2JGG2_MOUSE;tr|A0A0G2JF31|A0A0G2JF31_MOUSE;tr|D6RCW9|D6RCW9_MOUSE;tr|A0A0G2JF03|A0A0G2JF03_MOUSE;sp|P07607|TYSY_MOUSE	>tr|A0A0G2JGG2|A0A0G2JGG2_MOUSE Thymidylate synthase OS=Mus musculus OX=10090 GN=Tyms PE=1 SV=1;>tr|A0A0G2JF31|A0A0G2JF31_MOUSE Thymidylate synthase (Fragment) OS=Mus musculus OX=10090 GN=Tyms PE=1 SV=1;>tr|D6RCW9|D6RCW9_MOUSE Thymidylate synthase OS=Mus m	1	22.6	10.827	7.6955	0	0	0	1	1	1	0	0	0	2172700	1011700	1786600
sp|P07724|ALBU_MOUSE	sp|P07724|ALBU_MOUSE	>sp|P07724|ALBU_MOUSE Serum albumin OS=Mus musculus OX=10090 GN=Alb PE=1 SV=3	6	13.7	68.692	22.729	3	2	4	5	4	4	2474700	4214500	3330200	3152300	2738700	3459600
sp|P07742|RIR1_MOUSE	sp|P07742|RIR1_MOUSE	>sp|P07742|RIR1_MOUSE Ribonucleoside-diphosphate reductase large subunit OS=Mus musculus OX=10090 GN=Rrm1 PE=1 SV=2	4	7.7	90.209	12.07	2	2	2	1	2	0	778960	899450	1138700	207600	787710	538650
sp|Q00896|A1AT3_MOUSE	sp|Q00896|A1AT3_MOUSE;tr|A0A0R4J0X5|A0A0R4J0X5_MOUSE;sp|Q00897|A1AT4_MOUSE;sp|P22599|A1AT2_MOUSE;sp|P07758|A1AT1_MOUSE;tr|A0A0A0MQA3|A0A0A0MQA3_MOUSE	>sp|Q00896|A1AT3_MOUSE Alpha-1-antitrypsin 1-3 OS=Mus musculus OX=10090 GN=Serpina1c PE=1 SV=2;>tr|A0A0R4J0X5|A0A0R4J0X5_MOUSE Alpha-1-antitrypsin 1-3 OS=Mus musculus OX=10090 GN=Serpina1c PE=1 SV=1;>sp|Q00897|A1AT4_MOUSE Alpha-1-antitrypsin 1-4 OS=Mus mus	1	2.4	45.823	2.8473	0	1	1	1	0	0	315740	278420	171000	0	371450	345580
sp|P07901|HS90A_MOUSE	sp|P07901|HS90A_MOUSE	>sp|P07901|HS90A_MOUSE Heat shock protein HSP 90-alpha OS=Mus musculus OX=10090 GN=Hsp90aa1 PE=1 SV=4	26	44.9	84.787	323.31	62	73	67	79	72	72	91442000	125850000	116730000	148580000	124490000	142570000
sp|P08003|PDIA4_MOUSE	sp|P08003|PDIA4_MOUSE;tr|A0A0R4J0Z1|A0A0R4J0Z1_MOUSE	>sp|P08003|PDIA4_MOUSE Protein disulfide-isomerase A4 OS=Mus musculus OX=10090 GN=Pdia4 PE=1 SV=3;>tr|A0A0R4J0Z1|A0A0R4J0Z1_MOUSE Protein disulfide-isomerase A4 OS=Mus musculus OX=10090 GN=Pdia4 PE=1 SV=1	22	36.1	71.982	147.12	30	31	32	34	31	36	30400000	33012000	34068000	39821000	40083000	37490000
sp|P08030|APT_MOUSE	sp|P08030|APT_MOUSE;tr|A0A1D5RLR6|A0A1D5RLR6_MOUSE	>sp|P08030|APT_MOUSE Adenine phosphoribosyltransferase OS=Mus musculus OX=10090 GN=Aprt PE=1 SV=2;>tr|A0A1D5RLR6|A0A1D5RLR6_MOUSE Adenine phosphoribosyltransferase OS=Mus musculus OX=10090 GN=Aprt PE=1 SV=1	4	31.7	19.724	16.739	5	5	5	4	7	6	5580000	4716000	4152300	6357000	7819500	6409700
sp|P08113|ENPL_MOUSE	sp|P08113|ENPL_MOUSE;tr|F7C312|F7C312_MOUSE	>sp|P08113|ENPL_MOUSE Endoplasmin OS=Mus musculus OX=10090 GN=Hsp90b1 PE=1 SV=2;>tr|F7C312|F7C312_MOUSE Endoplasmin (Fragment) OS=Mus musculus OX=10090 GN=Hsp90b1 PE=1 SV=1	31	37	92.475	323.31	40	52	47	46	45	46	37184000	42646000	43941000	63555000	61238000	61160000
sp|P08122|CO4A2_MOUSE	sp|P08122|CO4A2_MOUSE	>sp|P08122|CO4A2_MOUSE Collagen alpha-2(IV) chain OS=Mus musculus OX=10090 GN=Col4a2 PE=1 SV=4	1	0.8	167.32	5.4157	1	2	1	0	2	1	0	0	0	0	0	0
sp|P08207|S10AA_MOUSE	sp|P08207|S10AA_MOUSE	>sp|P08207|S10AA_MOUSE Protein S100-A10 OS=Mus musculus OX=10090 GN=S100a10 PE=1 SV=2	2	32	11.186	7.4819	2	1	2	4	4	5	10623000	8006300	7684200	17345000	17256000	19420000
sp|P08228|SODC_MOUSE	sp|P08228|SODC_MOUSE	>sp|P08228|SODC_MOUSE Superoxide dismutase [Cu-Zn] OS=Mus musculus OX=10090 GN=Sod1 PE=1 SV=2	8	56.5	15.942	241.32	23	28	27	33	32	32	454550000	534640000	469270000	714050000	760560000	660020000
sp|P08249|MDHM_MOUSE	sp|P08249|MDHM_MOUSE	>sp|P08249|MDHM_MOUSE Malate dehydrogenase, mitochondrial OS=Mus musculus OX=10090 GN=Mdh2 PE=1 SV=3	16	60.1	35.611	224.35	32	43	39	50	39	44	110810000	127900000	118730000	235790000	141710000	161210000
tr|Q8BGR3|Q8BGR3_MOUSE	tr|Q8BGR3|Q8BGR3_MOUSE;sp|P08414|KCC4_MOUSE	>tr|Q8BGR3|Q8BGR3_MOUSE Calcium/calmodulin-dependent protein kinase IV OS=Mus musculus OX=10090 GN=Camk4 PE=1 SV=1;>sp|P08414|KCC4_MOUSE Calcium/calmodulin-dependent protein kinase type IV OS=Mus musculus OX=10090 GN=Camk4 PE=1 SV=2	4	10.7	52.542	8.5112	2	3	2	5	2	1	587150	3350100	729280	1650100	1115100	448140
sp|P08752|GNAI2_MOUSE	sp|P08752|GNAI2_MOUSE;tr|A0A0A6YWA9|A0A0A6YWA9_MOUSE	>sp|P08752|GNAI2_MOUSE Guanine nucleotide-binding protein G(i) subunit alpha-2 OS=Mus musculus OX=10090 GN=Gnai2 PE=1 SV=5;>tr|A0A0A6YWA9|A0A0A6YWA9_MOUSE Guanine nucleotide-binding protein G(i) subunit alpha-2 (Fragment) OS=Mus musculus OX=10090 GN=Gnai2	5	24.5	40.489	22.622	7	10	8	6	6	4	6796200	8625500	7246900	14676000	9951400	6954400
tr|A0A0R4J0V5|A0A0R4J0V5_MOUSE	tr|A0A0R4J0V5|A0A0R4J0V5_MOUSE;sp|P08775|RPB1_MOUSE	>tr|A0A0R4J0V5|A0A0R4J0V5_MOUSE DNA-directed RNA polymerase subunit OS=Mus musculus OX=10090 GN=Polr2a PE=1 SV=1;>sp|P08775|RPB1_MOUSE DNA-directed RNA polymerase II subunit RPB1 OS=Mus musculus OX=10090 GN=Polr2a PE=1 SV=3	11	8.2	213.48	29.151	8	9	6	10	7	13	902260	1169500	694540	994580	1106400	1224500
sp|P08905|LYZ2_MOUSE	sp|P08905|LYZ2_MOUSE;sp|P17897|LYZ1_MOUSE	>sp|P08905|LYZ2_MOUSE Lysozyme C-2 OS=Mus musculus OX=10090 GN=Lyz2 PE=1 SV=2;>sp|P17897|LYZ1_MOUSE Lysozyme C-1 OS=Mus musculus OX=10090 GN=Lyz1 PE=1 SV=1	2	14.9	16.689	3.911	3	1	2	0	0	1	6178800	2077700	602090	7041000	5503800	5166400
sp|P09055|ITB1_MOUSE	sp|P09055|ITB1_MOUSE	>sp|P09055|ITB1_MOUSE Integrin beta-1 OS=Mus musculus OX=10090 GN=Itgb1 PE=1 SV=1	2	3.5	88.231	6.8955	1	2	3	3	2	3	502900	396070	545560	632290	726720	909920
sp|P09103|PDIA1_MOUSE	sp|P09103|PDIA1_MOUSE	>sp|P09103|PDIA1_MOUSE Protein disulfide-isomerase OS=Mus musculus OX=10090 GN=P4hb PE=1 SV=2	20	39.9	57.058	315.3	34	42	42	49	48	43	64897000	70226000	59184000	91221000	85057000	73765000
tr|A0A1L1SU12|A0A1L1SU12_MOUSE	tr|A0A1L1SU12|A0A1L1SU12_MOUSE;tr|A0A1L1SRD3|A0A1L1SRD3_MOUSE;sp|P09240|CCKN_MOUSE;tr|Q8R041|Q8R041_MOUSE	>tr|A0A1L1SU12|A0A1L1SU12_MOUSE Cholecystokinin (Fragment) OS=Mus musculus OX=10090 GN=Cck PE=4 SV=1;>tr|A0A1L1SRD3|A0A1L1SRD3_MOUSE Cholecystokinin (Fragment) OS=Mus musculus OX=10090 GN=Cck PE=4 SV=1;>sp|P09240|CCKN_MOUSE Cholecystokinin OS=Mus musculus	1	10.3	7.3595	2.6545	1	1	1	1	1	1	6358400	7190000	5993100	7307600	8340000	6885000
sp|P09405|NUCL_MOUSE	sp|P09405|NUCL_MOUSE	>sp|P09405|NUCL_MOUSE Nucleolin OS=Mus musculus OX=10090 GN=Ncl PE=1 SV=2	28	35.8	76.722	323.31	67	76	69	85	89	90	147800000	192030000	192220000	240850000	198160000	177870000
sp|P09411|PGK1_MOUSE	sp|P09411|PGK1_MOUSE;tr|S4R2M7|S4R2M7_MOUSE	>sp|P09411|PGK1_MOUSE Phosphoglycerate kinase 1 OS=Mus musculus OX=10090 GN=Pgk1 PE=1 SV=4;>tr|S4R2M7|S4R2M7_MOUSE Phosphoglycerate kinase OS=Mus musculus OX=10090 GN=Pgk1 PE=1 SV=1	23	60.7	44.55	323.31	35	48	44	55	42	47	85289000	109730000	84476000	142290000	100880000	121640000
sp|P09528|FRIH_MOUSE	sp|P09528|FRIH_MOUSE	>sp|P09528|FRIH_MOUSE Ferritin heavy chain OS=Mus musculus OX=10090 GN=Fth1 PE=1 SV=2	5	32.4	21.066	15.21	5	4	7	9	3	3	8003800	6934500	6776600	9599200	7971100	7336900
tr|A0A3B2WBF0|A0A3B2WBF0_MOUSE	tr|A0A3B2WBF0|A0A3B2WBF0_MOUSE;sp|P09671|SODM_MOUSE	>tr|A0A3B2WBF0|A0A3B2WBF0_MOUSE Superoxide dismutase OS=Mus musculus OX=10090 GN=Sod2 PE=1 SV=1;>sp|P09671|SODM_MOUSE Superoxide dismutase [Mn], mitochondrial OS=Mus musculus OX=10090 GN=Sod2 PE=1 SV=3	5	28	19.633	19.379	2	2	1	4	4	4	13816000	11154000	15616000	17193000	15806000	18592000
sp|Q3THW5|H2AV_MOUSE	sp|Q3THW5|H2AV_MOUSE;sp|P0C0S6|H2AZ_MOUSE;tr|Q8R029|Q8R029_MOUSE;tr|Q3UA95|Q3UA95_MOUSE	>sp|Q3THW5|H2AV_MOUSE Histone H2A.V OS=Mus musculus OX=10090 GN=H2afv PE=1 SV=3;>sp|P0C0S6|H2AZ_MOUSE Histone H2A.Z OS=Mus musculus OX=10090 GN=H2afz PE=1 SV=2;>tr|Q8R029|Q8R029_MOUSE Histone H2A OS=Mus musculus OX=10090 GN=H2afv PE=2 SV=1;>tr|Q3UA95|Q3UA9	3	31.2	13.509	11.403	3	3	5	4	4	5	97706000	112050000	114950000	83773000	139510000	99102000
tr|F8WIA3|F8WIA3_MOUSE	tr|F8WIA3|F8WIA3_MOUSE;tr|J3QMA2|J3QMA2_MOUSE;tr|J3QK34|J3QK34_MOUSE;sp|P0C8B4|GON7_MOUSE	>tr|F8WIA3|F8WIA3_MOUSE Predicted gene 20604 OS=Mus musculus OX=10090 GN=Gm20604 PE=4 SV=1;>tr|J3QMA2|J3QMA2_MOUSE Predicted gene, 28051 OS=Mus musculus OX=10090 GN=Gm28051 PE=4 SV=1;>tr|J3QK34|J3QK34_MOUSE EKC/KEOPS complex subunit GON7 OS=Mus musculus OX	1	21.3	7.8946	3.7209	0	0	0	0	0	1	987860	1379800	0	1778400	0	1290700
sp|P0CG14|CTF8A_MOUSE	sp|P0CG14|CTF8A_MOUSE	>sp|P0CG14|CTF8A_MOUSE Chromosome transmission fidelity protein 8 homolog isoform 2 OS=Mus musculus OX=10090 GN=Chtf8 PE=1 SV=1	2	4.5	52.244	6.482	1	3	2	3	6	3	326080	274540	353430	319070	1158800	405280
tr|A0A0A6YW67|A0A0A6YW67_MOUSE	tr|A0A0A6YW67|A0A0A6YW67_MOUSE;tr|E9Q9J0|E9Q9J0_MOUSE;sp|P62984|RL40_MOUSE;sp|P62983|RS27A_MOUSE;tr|E9Q4P0|E9Q4P0_MOUSE;tr|E9Q5F6|E9Q5F6_MOUSE;tr|E9QNP0|E9QNP0_MOUSE;tr|Q5SX22|Q5SX22_MOUSE;sp|P0CG49|UBB_MOUSE;sp|P0CG50|UBC_MOUSE	>tr|A0A0A6YW67|A0A0A6YW67_MOUSE MCG23377, isoform CRA_b OS=Mus musculus OX=10090 GN=Gm8797 PE=4 SV=1;>tr|E9Q9J0|E9Q9J0_MOUSE Ubiquitin-60S ribosomal protein L40 (Fragment) OS=Mus musculus OX=10090 GN=Uba52 PE=4 SV=1;>sp|P62984|RL40_MOUSE Ubiquitin-60S ribo	7	63.6	8.7279	118.55	24	31	25	28	28	33	444270000	574630000	429380000	655330000	524400000	551540000
sp|P0DN34|NDUB1_MOUSE	sp|P0DN34|NDUB1_MOUSE	>sp|P0DN34|NDUB1_MOUSE NADH dehydrogenase [ubiquinone] 1 beta subcomplex subunit 1 OS=Mus musculus OX=10090 GN=Ndufb1 PE=1 SV=1	1	19.3	6.954	3.4103	1	1	1	1	1	0	6293700	10529000	8139500	10166000	9963300	1626400
sp|P0DP28|CALM3_MOUSE	sp|P0DP28|CALM3_MOUSE;sp|P0DP27|CALM2_MOUSE;sp|P0DP26|CALM1_MOUSE;tr|Q3UKW2|Q3UKW2_MOUSE;tr|A0A3Q4EHJ0|A0A3Q4EHJ0_MOUSE;sp|Q9D6P8|CALL3_MOUSE	>sp|P0DP28|CALM3_MOUSE Calmodulin-3 OS=Mus musculus OX=10090 GN=Calm3 PE=1 SV=1;>sp|P0DP27|CALM2_MOUSE Calmodulin-2 OS=Mus musculus OX=10090 GN=Calm2 PE=1 SV=1;>sp|P0DP26|CALM1_MOUSE Calmodulin-1 OS=Mus musculus OX=10090 GN=Calm1 PE=1 SV=1;>tr|Q3UKW2|Q3UKW	6	55.7	16.837	200.51	28	35	28	26	37	38	426560000	747800000	558730000	879160000	688960000	707560000
sp|P10107|ANXA1_MOUSE	sp|P10107|ANXA1_MOUSE	>sp|P10107|ANXA1_MOUSE Annexin A1 OS=Mus musculus OX=10090 GN=Anxa1 PE=1 SV=2	11	29.8	38.734	40.856	9	10	11	8	12	9	4651600	8524600	6209900	5567200	8663000	4985800
sp|P10126|EF1A1_MOUSE	sp|P10126|EF1A1_MOUSE;tr|D3Z3I8|D3Z3I8_MOUSE;tr|D3YZ68|D3YZ68_MOUSE	>sp|P10126|EF1A1_MOUSE Elongation factor 1-alpha 1 OS=Mus musculus OX=10090 GN=Eef1a1 PE=1 SV=3;>tr|D3Z3I8|D3Z3I8_MOUSE Elongation factor 1-alpha 1 (Fragment) OS=Mus musculus OX=10090 GN=Eef1a1 PE=1 SV=1;>tr|D3YZ68|D3YZ68_MOUSE Elongation factor 1-alpha 1	13	33.5	50.113	154.68	29	32	36	28	23	30	185770000	245010000	149180000	174890000	137290000	158700000
sp|P10404|ENV1_MOUSE	sp|P10404|ENV1_MOUSE	>sp|P10404|ENV1_MOUSE MLV-related proviral Env polyprotein OS=Mus musculus OX=10090 PE=1 SV=3	1	2.3	69.612	3.0831	0	1	1	0	0	0	0	0	0	0	0	0
sp|P10518|HEM2_MOUSE	sp|P10518|HEM2_MOUSE	>sp|P10518|HEM2_MOUSE Delta-aminolevulinic acid dehydratase OS=Mus musculus OX=10090 GN=Alad PE=1 SV=1	4	19.1	36.023	11.906	1	2	1	2	0	2	2619800	1742300	1578500	1896000	111640	1665000
sp|P10605|CATB_MOUSE	sp|P10605|CATB_MOUSE	>sp|P10605|CATB_MOUSE Cathepsin B OS=Mus musculus OX=10090 GN=Ctsb PE=1 SV=2	6	21.5	37.279	22.886	2	7	5	4	3	3	6170900	5320100	6943800	5379700	4854600	5729800
sp|P10630|IF4A2_MOUSE	sp|P10630|IF4A2_MOUSE;tr|Q8BTU6|Q8BTU6_MOUSE;tr|E9Q561|E9Q561_MOUSE;tr|A0A338P6X5|A0A338P6X5_MOUSE	>sp|P10630|IF4A2_MOUSE Eukaryotic initiation factor 4A-II OS=Mus musculus OX=10090 GN=Eif4a2 PE=1 SV=2;>tr|Q8BTU6|Q8BTU6_MOUSE Eukaryotic initiation factor 4A-II OS=Mus musculus OX=10090 GN=Eif4a2 PE=1 SV=1;>tr|E9Q561|E9Q561_MOUSE Eukaryotic initiation fac	4	32.7	46.402	21.056	5	5	2	4	1	3	4846200	5960300	4173600	5515900	6162600	6544900
sp|P10639|THIO_MOUSE	sp|P10639|THIO_MOUSE	>sp|P10639|THIO_MOUSE Thioredoxin OS=Mus musculus OX=10090 GN=Txn PE=1 SV=3	4	42.9	11.675	15.542	7	4	6	6	5	6	45880000	57579000	51463000	66589000	68971000	55428000
sp|P10649|GSTM1_MOUSE	sp|P10649|GSTM1_MOUSE;tr|A2AE89|A2AE89_MOUSE	>sp|P10649|GSTM1_MOUSE Glutathione S-transferase Mu 1 OS=Mus musculus OX=10090 GN=Gstm1 PE=1 SV=2;>tr|A2AE89|A2AE89_MOUSE Glutathione S-transferase Mu 1 OS=Mus musculus OX=10090 GN=Gstm1 PE=1 SV=2	2	9.6	25.97	4.2826	0	0	0	1	0	0	0	320590	232980	240010	357720	0
sp|P10711|TCEA1_MOUSE	sp|P10711|TCEA1_MOUSE;tr|E9PYD5|E9PYD5_MOUSE	>sp|P10711|TCEA1_MOUSE Transcription elongation factor A protein 1 OS=Mus musculus OX=10090 GN=Tcea1 PE=1 SV=2;>tr|E9PYD5|E9PYD5_MOUSE Transcription elongation factor A protein 1 OS=Mus musculus OX=10090 GN=Tcea1 PE=1 SV=1	9	30.2	33.88	34.328	10	12	11	8	12	8	13707000	15804000	13561000	14279000	17290000	15882000
sp|Q8CGP2|H2B1P_MOUSE	sp|Q8CGP2|H2B1P_MOUSE;sp|Q6ZWY9|H2B1C_MOUSE;sp|Q64525|H2B2B_MOUSE;sp|Q64478|H2B1H_MOUSE;sp|Q64475|H2B1B_MOUSE;sp|P10854|H2B1M_MOUSE;sp|P10853|H2B1F_MOUSE;sp|Q8CGP1|H2B1K_MOUSE;tr|Q8CBB6|Q8CBB6_MOUSE;sp|P70696|H2B1A_MOUSE	>sp|Q8CGP2|H2B1P_MOUSE Histone H2B type 1-P OS=Mus musculus OX=10090 GN=Hist1h2bp PE=1 SV=3;>sp|Q6ZWY9|H2B1C_MOUSE Histone H2B type 1-C/E/G OS=Mus musculus OX=10090 GN=Hist1h2bc PE=1 SV=3;>sp|Q64525|H2B2B_MOUSE Histone H2B type 2-B OS=Mus musculus OX=10090	5	63.5	13.992	100.12	64	64	67	66	56	55	3448200000	3506900000	2599500000	3440700000	1822400000	2164300000
sp|P10922|H10_MOUSE	sp|P10922|H10_MOUSE	>sp|P10922|H10_MOUSE Histone H1.0 OS=Mus musculus OX=10090 GN=H1f0 PE=2 SV=4	2	10.8	20.861	7.0852	4	4	3	2	2	2	9336500	12537000	9499800	8145800	9353400	7156200
sp|P11031|TCP4_MOUSE	sp|P11031|TCP4_MOUSE	>sp|P11031|TCP4_MOUSE Activated RNA polymerase II transcriptional coactivator p15 OS=Mus musculus OX=10090 GN=Sub1 PE=1 SV=3	7	42.5	14.427	187.57	13	16	19	19	19	21	161250000	170090000	159400000	217070000	206720000	266310000
sp|P11352|GPX1_MOUSE	sp|P11352|GPX1_MOUSE;tr|A0A0A6YY34|A0A0A6YY34_MOUSE;tr|A0A0A6YVV2|A0A0A6YVV2_MOUSE	>sp|P11352|GPX1_MOUSE Glutathione peroxidase 1 OS=Mus musculus OX=10090 GN=Gpx1 PE=1 SV=2;>tr|A0A0A6YY34|A0A0A6YY34_MOUSE Glutathione peroxidase OS=Mus musculus OX=10090 GN=Gpx1 PE=1 SV=1;>tr|A0A0A6YVV2|A0A0A6YVV2_MOUSE Glutathione peroxidase OS=Mus muscul	11	61.2	22.329	101.95	15	17	13	19	18	19	32966000	49595000	34283000	57368000	44963000	42153000
sp|P11438|LAMP1_MOUSE	sp|P11438|LAMP1_MOUSE	>sp|P11438|LAMP1_MOUSE Lysosome-associated membrane glycoprotein 1 OS=Mus musculus OX=10090 GN=Lamp1 PE=1 SV=2	1	3	43.865	3.5939	1	1	1	1	0	1	1303900	1498900	1565500	1849500	1781000	1813600
sp|P11499|HS90B_MOUSE	sp|P11499|HS90B_MOUSE	>sp|P11499|HS90B_MOUSE Heat shock protein HSP 90-beta OS=Mus musculus OX=10090 GN=Hsp90ab1 PE=1 SV=3	29	54.4	83.28	323.31	159	160	165	174	180	188	486450000	607820000	488940000	783770000	649860000	729180000
tr|Q542I8|Q542I8_MOUSE	tr|Q542I8|Q542I8_MOUSE;sp|P11835|ITB2_MOUSE;tr|M0QWA7|M0QWA7_MOUSE	>tr|Q542I8|Q542I8_MOUSE Integrin beta OS=Mus musculus OX=10090 GN=Itgb2 PE=1 SV=1;>sp|P11835|ITB2_MOUSE Integrin beta-2 OS=Mus musculus OX=10090 GN=Itgb2 PE=1 SV=2;>tr|M0QWA7|M0QWA7_MOUSE Integrin beta OS=Mus musculus OX=10090 GN=Itgb2 PE=1 SV=1	15	25.7	84.893	67.989	17	15	14	20	15	16	10975000	9814100	7329500	12296000	10009000	11100000
sp|P11942|CD3G_MOUSE	sp|P11942|CD3G_MOUSE	>sp|P11942|CD3G_MOUSE T-cell surface glycoprotein CD3 gamma chain OS=Mus musculus OX=10090 GN=Cd3g PE=1 SV=1	3	24.7	20.234	9.3005	2	1	3	4	3	1	3681700	3939700	5886000	6468000	9331400	4842600
sp|P11983|TCPA_MOUSE	sp|P11983|TCPA_MOUSE	>sp|P11983|TCPA_MOUSE T-complex protein 1 subunit alpha OS=Mus musculus OX=10090 GN=Tcp1 PE=1 SV=3	24	45.9	60.448	124.92	25	29	22	30	26	30	25761000	37527000	25484000	39399000	26223000	27145000
sp|P12265|BGLR_MOUSE	sp|P12265|BGLR_MOUSE	>sp|P12265|BGLR_MOUSE Beta-glucuronidase OS=Mus musculus OX=10090 GN=Gusb PE=1 SV=2	6	15.9	74.194	19.24	3	3	3	9	4	2	862530	1555800	875150	2215700	1180800	1351400
tr|A0A0A6YX73|A0A0A6YX73_MOUSE	tr|A0A0A6YX73|A0A0A6YX73_MOUSE;sp|P12367|KAP2_MOUSE;tr|Q8K1M3|Q8K1M3_MOUSE;tr|A0A0A6YY28|A0A0A6YY28_MOUSE	>tr|A0A0A6YX73|A0A0A6YX73_MOUSE cAMP-dependent protein kinase type II-alpha regulatory subunit OS=Mus musculus OX=10090 GN=Prkar2a PE=1 SV=1;>sp|P12367|KAP2_MOUSE cAMP-dependent protein kinase type II-alpha regulatory subunit OS=Mus musculus OX=10090 GN=Pr	3	13.7	43.165	8.008	2	0	2	2	0	2	114730	238410	488900	1036500	0	680560
sp|P12382|PFKAL_MOUSE	sp|P12382|PFKAL_MOUSE	>sp|P12382|PFKAL_MOUSE ATP-dependent 6-phosphofructokinase, liver type OS=Mus musculus OX=10090 GN=Pfkl PE=1 SV=4	5	11.9	85.359	18.76	2	4	6	3	5	7	1160100	1849700	1506600	2032400	1553200	2185200
sp|P12787|COX5A_MOUSE	sp|P12787|COX5A_MOUSE	>sp|P12787|COX5A_MOUSE Cytochrome c oxidase subunit 5A, mitochondrial OS=Mus musculus OX=10090 GN=Cox5a PE=1 SV=2	6	28.1	16.101	59.189	8	8	6	12	13	11	79454000	93696000	66417000	125780000	105780000	122100000
sp|P12815|PDCD6_MOUSE	sp|P12815|PDCD6_MOUSE	>sp|P12815|PDCD6_MOUSE Programmed cell death protein 6 OS=Mus musculus OX=10090 GN=Pdcd6 PE=1 SV=2	6	31.9	21.867	29.128	7	8	5	4	6	8	9306100	13245000	11598000	11353000	11769000	16210000
sp|P12970|RL7A_MOUSE	sp|P12970|RL7A_MOUSE	>sp|P12970|RL7A_MOUSE 60S ribosomal protein L7a OS=Mus musculus OX=10090 GN=Rpl7a PE=1 SV=2	4	18.8	29.976	8.8368	3	5	1	0	0	1	2895200	4262400	3421200	1328400	70181	1432700
sp|P13379|CD5_MOUSE	sp|P13379|CD5_MOUSE	>sp|P13379|CD5_MOUSE T-cell surface glycoprotein CD5 OS=Mus musculus OX=10090 GN=Cd5 PE=1 SV=1	7	23.3	53.849	46.17	6	8	6	11	7	13	4053300	5745100	3870800	6561600	7906800	9176500
sp|P13439|UMPS_MOUSE	sp|P13439|UMPS_MOUSE	>sp|P13439|UMPS_MOUSE Uridine 5-monophosphate synthase OS=Mus musculus OX=10090 GN=Umps PE=1 SV=3	5	10.8	52.292	13.85	3	4	1	3	2	2	423440	817480	1534000	1174900	1243600	880230
sp|P14069|S10A6_MOUSE	sp|P14069|S10A6_MOUSE	>sp|P14069|S10A6_MOUSE Protein S100-A6 OS=Mus musculus OX=10090 GN=S100a6 PE=1 SV=3	2	10.1	10.051	5.0137	2	2	2	1	1	1	5594800	5123300	3800900	5557600	4944200	5311400
sp|P14115|RL27A_MOUSE	sp|P14115|RL27A_MOUSE	>sp|P14115|RL27A_MOUSE 60S ribosomal protein L27a OS=Mus musculus OX=10090 GN=Rpl27a PE=1 SV=5	2	8.8	16.605	9.3585	2	3	3	3	3	4	7188200	8629900	7592700	3950400	4447500	5822700
sp|P14131|RS16_MOUSE	sp|P14131|RS16_MOUSE	>sp|P14131|RS16_MOUSE 40S ribosomal protein S16 OS=Mus musculus OX=10090 GN=Rps16 PE=1 SV=4	6	37	16.445	17.36	10	8	7	5	3	6	7144000	9747600	8619500	7442500	2796800	5345200
sp|P14152|MDHC_MOUSE	sp|P14152|MDHC_MOUSE	>sp|P14152|MDHC_MOUSE Malate dehydrogenase, cytoplasmic OS=Mus musculus OX=10090 GN=Mdh1 PE=1 SV=3	12	38	36.511	216.31	36	45	41	37	41	36	236630000	317350000	287850000	445370000	339420000	306570000
sp|P14206|RSSA_MOUSE	sp|P14206|RSSA_MOUSE	>sp|P14206|RSSA_MOUSE 40S ribosomal protein SA OS=Mus musculus OX=10090 GN=Rpsa PE=1 SV=4	13	46.4	32.838	323.31	26	26	32	33	28	30	134370000	129830000	138600000	223290000	166420000	161230000
sp|P14211|CALR_MOUSE	sp|P14211|CALR_MOUSE	>sp|P14211|CALR_MOUSE Calreticulin OS=Mus musculus OX=10090 GN=Calr PE=1 SV=1	17	43.8	47.994	212.56	39	35	36	40	40	44	111980000	160060000	149890000	188000000	155870000	189230000
tr|E9PWT4|E9PWT4_MOUSE	tr|E9PWT4|E9PWT4_MOUSE;tr|E9QJR9|E9QJR9_MOUSE;sp|P14429|HA17_MOUSE;sp|P14431|HA19_MOUSE;tr|L7N260|L7N260_MOUSE;tr|P79568|P79568_MOUSE;sp|P14430|HA18_MOUSE	>tr|E9PWT4|E9PWT4_MOUSE H-2 class I histocompatibility antigen, Q7 alpha chain OS=Mus musculus OX=10090 GN=H2-Q7 PE=3 SV=2;>tr|E9QJR9|E9QJR9_MOUSE H-2 class I histocompatibility antigen, Q7 alpha chain OS=Mus musculus OX=10090 GN=H2-Q7 PE=3 SV=1;>sp|P14429	2	23.9	35.181	8.1158	0	0	0	1	1	4	1129800	1203300	955190	1476400	1301300	2070200
tr|G3UWR9|G3UWR9_MOUSE	tr|G3UWR9|G3UWR9_MOUSE;sp|P14438|HA2U_MOUSE;sp|P14434|HA2B_MOUSE;sp|P14437|HA2S_MOUSE;sp|P14436|HA2R_MOUSE;sp|P14435|HA2F_MOUSE;sp|P23150|HA2J_MOUSE;sp|P04228|HA2D_MOUSE;sp|P01910|HA2K_MOUSE	>tr|G3UWR9|G3UWR9_MOUSE H-2 class II histocompatibility antigen, A-Q alpha chain OS=Mus musculus OX=10090 GN=H2-Aa PE=1 SV=1;>sp|P14438|HA2U_MOUSE H-2 class II histocompatibility antigen, A-U alpha chain (Fragment) OS=Mus musculus OX=10090 GN=H2-Aa PE=1 SV	2	15.6	18.971	33.199	2	2	2	2	2	3	9711900	11056000	11001000	16664000	13104000	16190000
sp|P14483|HB2A_MOUSE	sp|P14483|HB2A_MOUSE;sp|P01921|HB2D_MOUSE;sp|P06346|HB2F_MOUSE;sp|P06345|HB2S_MOUSE;sp|P06344|HB2U_MOUSE;sp|P06343|HB2K_MOUSE;sp|P06342|HB2Q_MOUSE	>sp|P14483|HB2A_MOUSE H-2 class II histocompatibility antigen, A beta chain OS=Mus musculus OX=10090 GN=H2-Ab1 PE=1 SV=1;>sp|P01921|HB2D_MOUSE H-2 class II histocompatibility antigen, A-D beta chain OS=Mus musculus OX=10090 GN=H2-Ab1 PE=1 SV=1;>sp|P06346|H	5	23.4	30.128	39.505	4	5	2	4	4	6	6273700	8271600	5719800	12565000	10516000	8400500
tr|F7B7L8|F7B7L8_MOUSE	tr|F7B7L8|F7B7L8_MOUSE;sp|P14685|PSMD3_MOUSE	>tr|F7B7L8|F7B7L8_MOUSE 26S proteasome non-ATPase regulatory subunit 3 (Fragment) OS=Mus musculus OX=10090 GN=Psmd3 PE=1 SV=1;>sp|P14685|PSMD3_MOUSE 26S proteasome non-ATPase regulatory subunit 3 OS=Mus musculus OX=10090 GN=Psmd3 PE=1 SV=3	1	6.3	25.357	2.7293	2	2	1	0	1	1	462060	495980	682860	1355800	887800	768140
sp|P14733|LMNB1_MOUSE	sp|P14733|LMNB1_MOUSE	>sp|P14733|LMNB1_MOUSE Lamin-B1 OS=Mus musculus OX=10090 GN=Lmnb1 PE=1 SV=3	39	60.7	66.785	323.31	95	108	109	111	114	120	345190000	366370000	374830000	517630000	463410000	530720000
sp|P14824|ANXA6_MOUSE	sp|P14824|ANXA6_MOUSE	>sp|P14824|ANXA6_MOUSE Annexin A6 OS=Mus musculus OX=10090 GN=Anxa6 PE=1 SV=3	2	64.8	75.884	323.31	76	86	79	90	89	94	65666000	95182000	76305000	102820000	78248000	93141000
sp|P14869|RLA0_MOUSE	sp|P14869|RLA0_MOUSE;tr|S4R1N1|S4R1N1_MOUSE;tr|D3YVM5|D3YVM5_MOUSE	>sp|P14869|RLA0_MOUSE 60S acidic ribosomal protein P0 OS=Mus musculus OX=10090 GN=Rplp0 PE=1 SV=3;>tr|S4R1N1|S4R1N1_MOUSE 60S acidic ribosomal protein P0 (Fragment) OS=Mus musculus OX=10090 GN=Rplp0 PE=1 SV=1;>tr|D3YVM5|D3YVM5_MOUSE 60S acidic ribosomal pr	8	36.9	34.216	48.928	14	12	15	12	9	11	16034000	26277000	19900000	31652000	21841000	22700000
sp|P14901|HMOX1_MOUSE	sp|P14901|HMOX1_MOUSE	>sp|P14901|HMOX1_MOUSE Heme oxygenase 1 OS=Mus musculus OX=10090 GN=Hmox1 PE=1 SV=1	3	12.5	32.928	9.1616	2	4	3	0	0	0	967620	3561100	2587000	0	0	0
sp|P15307|REL_MOUSE	sp|P15307|REL_MOUSE;tr|A4QPD3|A4QPD3_MOUSE	>sp|P15307|REL_MOUSE Proto-oncogene c-Rel OS=Mus musculus OX=10090 GN=Rel PE=1 SV=2;>tr|A4QPD3|A4QPD3_MOUSE Proto-oncogene c-Rel OS=Mus musculus OX=10090 GN=Rel PE=1 SV=1	8	19.8	64.959	22.95	5	5	7	7	8	6	3080000	4117200	2535200	7538100	2350100	3116000
tr|Q3U8S1|Q3U8S1_MOUSE	tr|Q3U8S1|Q3U8S1_MOUSE;tr|A2APM5|A2APM5_MOUSE;tr|A2APM3|A2APM3_MOUSE;tr|A2APM4|A2APM4_MOUSE;tr|E9QKM8|E9QKM8_MOUSE;tr|Q80X37|Q80X37_MOUSE;tr|A2APM1|A2APM1_MOUSE;sp|P15379|CD44_MOUSE;tr|A2APM2|A2APM2_MOUSE	>tr|Q3U8S1|Q3U8S1_MOUSE CD44 antigen OS=Mus musculus OX=10090 GN=Cd44 PE=1 SV=1;>tr|A2APM5|A2APM5_MOUSE CD44 antigen OS=Mus musculus OX=10090 GN=Cd44 PE=1 SV=1;>tr|A2APM3|A2APM3_MOUSE CD44 antigen OS=Mus musculus OX=10090 GN=Cd44 PE=1 SV=1;>tr|A2APM4|A2APM	1	3.3	40.263	4.8822	1	0	0	1	1	1	661590	855310	1643100	1152300	1402000	1985000
sp|P15532|NDKA_MOUSE	sp|P15532|NDKA_MOUSE	>sp|P15532|NDKA_MOUSE Nucleoside diphosphate kinase A OS=Mus musculus OX=10090 GN=Nme1 PE=1 SV=1	1	58.6	17.208	-2	0	0	0	1	0	0	495820	1454100	847270	1582700	1556800	1047500
tr|A0A0U1RNN5|A0A0U1RNN5_MOUSE	tr|A0A0U1RNN5|A0A0U1RNN5_MOUSE;sp|P15702|LEUK_MOUSE	>tr|A0A0U1RNN5|A0A0U1RNN5_MOUSE Leukosialin (Fragment) OS=Mus musculus OX=10090 GN=Spn PE=1 SV=1;>sp|P15702|LEUK_MOUSE Leukosialin OS=Mus musculus OX=10090 GN=Spn PE=1 SV=1	3	35.7	14.547	30.312	1	3	2	7	3	2	6694300	6083100	7859600	11008000	7013900	4146000
sp|P15864|H12_MOUSE	sp|P15864|H12_MOUSE	>sp|P15864|H12_MOUSE Histone H1.2 OS=Mus musculus OX=10090 GN=Hist1h1c PE=1 SV=2	2	27.8	21.266	9.8455	5	4	5	2	1	2	89431000	115540000	139920000	30698000	17858000	36727000
sp|P16045|LEG1_MOUSE	sp|P16045|LEG1_MOUSE	>sp|P16045|LEG1_MOUSE Galectin-1 OS=Mus musculus OX=10090 GN=Lgals1 PE=1 SV=3	6	60	14.866	66.903	19	20	19	20	21	17	107190000	116320000	103730000	151710000	148450000	151090000
sp|P16125|LDHB_MOUSE	sp|P16125|LDHB_MOUSE;tr|D3Z7F0|D3Z7F0_MOUSE	>sp|P16125|LDHB_MOUSE L-lactate dehydrogenase B chain OS=Mus musculus OX=10090 GN=Ldhb PE=1 SV=2;>tr|D3Z7F0|D3Z7F0_MOUSE L-lactate dehydrogenase (Fragment) OS=Mus musculus OX=10090 GN=Ldhb PE=1 SV=1	12	40.1	36.572	53.67	16	16	13	12	13	12	22514000	28779000	27657000	40885000	33356000	32065000
sp|P16332|MUTA_MOUSE	sp|P16332|MUTA_MOUSE	>sp|P16332|MUTA_MOUSE Methylmalonyl-CoA mutase, mitochondrial OS=Mus musculus OX=10090 GN=Mmut PE=1 SV=2	3	6.8	82.843	4.3982	1	0	0	0	3	2	257970	183700	389730	97028	490790	483780
sp|P16460|ASSY_MOUSE	sp|P16460|ASSY_MOUSE	>sp|P16460|ASSY_MOUSE Argininosuccinate synthase OS=Mus musculus OX=10090 GN=Ass1 PE=1 SV=1	14	24.3	46.584	52.398	16	17	14	17	21	15	21389000	27160000	27693000	32951000	27258000	23998000
sp|P16546|SPTN1_MOUSE	sp|P16546|SPTN1_MOUSE;tr|A3KGU5|A3KGU5_MOUSE;tr|A3KGU7|A3KGU7_MOUSE;tr|E9Q447|E9Q447_MOUSE;tr|A3KGU9|A3KGU9_MOUSE	>sp|P16546|SPTN1_MOUSE Spectrin alpha chain, non-erythrocytic 1 OS=Mus musculus OX=10090 GN=Sptan1 PE=1 SV=4;>tr|A3KGU5|A3KGU5_MOUSE Spectrin alpha chain, non-erythrocytic 1 OS=Mus musculus OX=10090 GN=Sptan1 PE=1 SV=1;>tr|A3KGU7|A3KGU7_MOUSE Spectrin alph	62	32.7	284.59	323.31	44	56	54	70	72	52	7663500	8740700	8561900	13815000	12723000	11082000
sp|P16675|PPGB_MOUSE	sp|P16675|PPGB_MOUSE;tr|G3X8T3|G3X8T3_MOUSE	>sp|P16675|PPGB_MOUSE Lysosomal protective protein OS=Mus musculus OX=10090 GN=Ctsa PE=1 SV=1;>tr|G3X8T3|G3X8T3_MOUSE Carboxypeptidase OS=Mus musculus OX=10090 GN=Ctsa PE=1 SV=1	5	10.3	53.844	17.569	3	5	5	2	3	5	2703500	2857100	1971200	3320700	1871400	3477800
sp|P16858|G3P_MOUSE	sp|P16858|G3P_MOUSE;tr|A0A0A0MQF6|A0A0A0MQF6_MOUSE;tr|A0A1D5RLD8|A0A1D5RLD8_MOUSE;tr|S4R1W1|S4R1W1_MOUSE;tr|S4R257|S4R257_MOUSE	>sp|P16858|G3P_MOUSE Glyceraldehyde-3-phosphate dehydrogenase OS=Mus musculus OX=10090 GN=Gapdh PE=1 SV=2;>tr|A0A0A0MQF6|A0A0A0MQF6_MOUSE Glyceraldehyde-3-phosphate dehydrogenase OS=Mus musculus OX=10090 GN=Gapdh PE=1 SV=1;>tr|A0A1D5RLD8|A0A1D5RLD8_MOUSE G	20	52.6	35.81	323.31	75	83	80	99	81	93	884500000	1323300000	813790000	1184000000	808910000	940170000
tr|Q3TE85|Q3TE85_MOUSE	tr|Q3TE85|Q3TE85_MOUSE;sp|P17095|HMGA1_MOUSE;tr|A0A338P6F6|A0A338P6F6_MOUSE	>tr|Q3TE85|Q3TE85_MOUSE High mobility group protein HMG-I/HMG-Y OS=Mus musculus OX=10090 GN=Hmga1 PE=1 SV=1;>sp|P17095|HMGA1_MOUSE High mobility group protein HMG-I/HMG-Y OS=Mus musculus OX=10090 GN=Hmga1 PE=1 SV=4;>tr|A0A338P6F6|A0A338P6F6_MOUSE High mobi	2	23.6	11.485	16.323	3	4	3	3	3	3	11760000	15672000	25990000	20814000	16411000	13743000
sp|P17182|ENOA_MOUSE	sp|P17182|ENOA_MOUSE;tr|Q6PHC1|Q6PHC1_MOUSE	>sp|P17182|ENOA_MOUSE Alpha-enolase OS=Mus musculus OX=10090 GN=Eno1 PE=1 SV=3;>tr|Q6PHC1|Q6PHC1_MOUSE Alpha-enolase OS=Mus musculus OX=10090 GN=Eno1 PE=1 SV=1	24	65.2	47.14	323.31	64	82	90	102	87	98	494690000	465840000	464520000	696940000	494060000	561250000
sp|P17665|COX7C_MOUSE	sp|P17665|COX7C_MOUSE	>sp|P17665|COX7C_MOUSE Cytochrome c oxidase subunit 7C, mitochondrial OS=Mus musculus OX=10090 GN=Cox7c PE=1 SV=1	1	14.3	7.3325	2.9725	1	1	1	0	1	1	0	5501200	0	9901200	4229600	5093000
tr|G3UVV4|G3UVV4_MOUSE	tr|G3UVV4|G3UVV4_MOUSE;sp|P17710|HXK1_MOUSE	>tr|G3UVV4|G3UVV4_MOUSE Hexokinase 1, isoform CRA_f OS=Mus musculus OX=10090 GN=Hk1 PE=1 SV=1;>sp|P17710|HXK1_MOUSE Hexokinase-1 OS=Mus musculus OX=10090 GN=Hk1 PE=1 SV=3	15	18.9	101.87	49.227	7	8	7	10	5	8	2856700	2306500	2321900	3562800	2256600	1734500
sp|P17742|PPIA_MOUSE	sp|P17742|PPIA_MOUSE;tr|A0A1L1SST0|A0A1L1SST0_MOUSE	>sp|P17742|PPIA_MOUSE Peptidyl-prolyl cis-trans isomerase A OS=Mus musculus OX=10090 GN=Ppia PE=1 SV=2;>tr|A0A1L1SST0|A0A1L1SST0_MOUSE Peptidyl-prolyl cis-trans isomerase OS=Mus musculus OX=10090 GN=Ppia PE=1 SV=1	15	89	17.971	297.48	84	86	85	90	101	100	1383000000	1799000000	1457300000	2470900000	1600500000	1834000000
sp|P17751|TPIS_MOUSE	sp|P17751|TPIS_MOUSE;tr|H7BXC3|H7BXC3_MOUSE	>sp|P17751|TPIS_MOUSE Triosephosphate isomerase OS=Mus musculus OX=10090 GN=Tpi1 PE=1 SV=4;>tr|H7BXC3|H7BXC3_MOUSE Triosephosphate isomerase OS=Mus musculus OX=10090 GN=Tpi1 PE=1 SV=1	14	53.8	32.191	234.44	25	29	25	28	21	30	72181000	90314000	78017000	147440000	98796000	105910000
sp|P17918|PCNA_MOUSE	sp|P17918|PCNA_MOUSE;tr|A0A140T8V5|A0A140T8V5_MOUSE	>sp|P17918|PCNA_MOUSE Proliferating cell nuclear antigen OS=Mus musculus OX=10090 GN=Pcna PE=1 SV=2;>tr|A0A140T8V5|A0A140T8V5_MOUSE Proliferating cell nuclear antigen OS=Mus musculus OX=10090 GN=Pcna-ps2 PE=3 SV=1	4	18.8	28.785	27.018	7	7	8	6	8	3	10336000	5878600	7337800	7645200	7354100	8809300
sp|P18155|MTDC_MOUSE	sp|P18155|MTDC_MOUSE	>sp|P18155|MTDC_MOUSE Bifunctional methylenetetrahydrofolate dehydrogenase/cyclohydrolase, mitochondrial OS=Mus musculus OX=10090 GN=Mthfd2 PE=1 SV=1	1	3.4	37.863	2.6341	2	1	0	0	0	0	120900	170530	0	236100	214910	0
tr|F6Y6L6|F6Y6L6_MOUSE	tr|F6Y6L6|F6Y6L6_MOUSE;tr|F8WIR1|F8WIR1_MOUSE;sp|P18242|CATD_MOUSE;tr|A0A1B0GT66|A0A1B0GT66_MOUSE	>tr|F6Y6L6|F6Y6L6_MOUSE Predicted gene, 49369 (Fragment) OS=Mus musculus OX=10090 GN=Gm49369 PE=1 SV=1;>tr|F8WIR1|F8WIR1_MOUSE Cathepsin D OS=Mus musculus OX=10090 GN=Ctsd PE=1 SV=2;>sp|P18242|CATD_MOUSE Cathepsin D OS=Mus musculus OX=10090 GN=Ctsd PE=1 SV	6	35.3	29.842	19.049	8	5	4	5	8	6	13813000	13534000	9772300	13623000	11505000	14499000
tr|Q3TCF3|Q3TCF3_MOUSE	tr|Q3TCF3|Q3TCF3_MOUSE;sp|P18337|LYAM1_MOUSE;tr|B1B507|B1B507_MOUSE	>tr|Q3TCF3|Q3TCF3_MOUSE L-selectin OS=Mus musculus OX=10090 GN=Sell PE=1 SV=1;>sp|P18337|LYAM1_MOUSE L-selectin OS=Mus musculus OX=10090 GN=Sell PE=1 SV=1;>tr|B1B507|B1B507_MOUSE L-selectin OS=Mus musculus OX=10090 GN=Sell PE=1 SV=1	1	3.3	38.462	3.9308	1	0	0	1	0	1	611890	750450	623380	1649700	1021700	1224400
tr|J3QP71|J3QP71_MOUSE	tr|J3QP71|J3QP71_MOUSE;tr|K3W4Q8|K3W4Q8_MOUSE;sp|P18572|BASI_MOUSE	>tr|J3QP71|J3QP71_MOUSE Basigin (Fragment) OS=Mus musculus OX=10090 GN=Bsg PE=1 SV=1;>tr|K3W4Q8|K3W4Q8_MOUSE Basigin OS=Mus musculus OX=10090 GN=Bsg PE=1 SV=1;>sp|P18572|BASI_MOUSE Basigin OS=Mus musculus OX=10090 GN=Bsg PE=1 SV=2	2	11.7	21.602	7.8797	2	3	4	3	1	3	2380100	2085800	2333800	2284600	2926600	3206600
sp|P18654|KS6A3_MOUSE	sp|P18654|KS6A3_MOUSE;tr|B1AXN9|B1AXN9_MOUSE	>sp|P18654|KS6A3_MOUSE Ribosomal protein S6 kinase alpha-3 OS=Mus musculus OX=10090 GN=Rps6ka3 PE=1 SV=2;>tr|B1AXN9|B1AXN9_MOUSE Non-specific serine/threonine protein kinase OS=Mus musculus OX=10090 GN=Rps6ka3 PE=1 SV=1	6	10.5	83.693	14.705	2	1	2	3	3	5	1281900	511410	617780	669150	1225400	2065400
sp|P18760|COF1_MOUSE	sp|P18760|COF1_MOUSE;tr|F8WGL3|F8WGL3_MOUSE	>sp|P18760|COF1_MOUSE Cofilin-1 OS=Mus musculus OX=10090 GN=Cfl1 PE=1 SV=3;>tr|F8WGL3|F8WGL3_MOUSE Cofilin-1 OS=Mus musculus OX=10090 GN=Cfl1 PE=1 SV=1	16	81.3	18.559	261.54	47	66	47	52	63	55	1021000000	1192800000	1650000000	3557900000	1325800000	1966000000
tr|A0A0U1RNJ1|A0A0U1RNJ1_MOUSE	tr|A0A0U1RNJ1|A0A0U1RNJ1_MOUSE;sp|P19096|FAS_MOUSE	>tr|A0A0U1RNJ1|A0A0U1RNJ1_MOUSE Fatty acid synthase OS=Mus musculus OX=10090 GN=Fasn PE=1 SV=1;>sp|P19096|FAS_MOUSE Fatty acid synthase OS=Mus musculus OX=10090 GN=Fasn PE=1 SV=2	17	9.5	272.22	63.129	14	16	11	15	19	17	983020	1315400	930140	1449400	1754500	1323800
sp|P19157|GSTP1_MOUSE	sp|P19157|GSTP1_MOUSE	>sp|P19157|GSTP1_MOUSE Glutathione S-transferase P 1 OS=Mus musculus OX=10090 GN=Gstp1 PE=1 SV=2	6	31.9	23.609	280.88	26	25	25	28	28	30	79057000	118310000	158050000	190630000	133670000	186830000
tr|A0A1B0GQW6|A0A1B0GQW6_MOUSE	tr|A0A1B0GQW6|A0A1B0GQW6_MOUSE;tr|A0A1B0GSF0|A0A1B0GSF0_MOUSE;tr|A0A1B0GSQ6|A0A1B0GSQ6_MOUSE;tr|A0A1B0GTA1|A0A1B0GTA1_MOUSE;sp|P19253|RL13A_MOUSE;tr|A0A1B0GS68|A0A1B0GS68_MOUSE;tr|A0A1B0GSB2|A0A1B0GSB2_MOUSE;tr|A0A140T8K2|A0A140T8K2_MOUSE	>tr|A0A1B0GQW6|A0A1B0GQW6_MOUSE 60S ribosomal protein L13a (Fragment) OS=Mus musculus OX=10090 GN=Rpl13a PE=4 SV=2;>tr|A0A1B0GSF0|A0A1B0GSF0_MOUSE 60S ribosomal protein L13a OS=Mus musculus OX=10090 GN=Rpl13a PE=4 SV=1;>tr|A0A1B0GSQ6|A0A1B0GSQ6_MOUSE 60S r	2	27.5	7.9826	3.4148	1	1	0	1	0	0	5976000	8504700	9508900	5588500	5126700	0
tr|A0A140LHR4|A0A140LHR4_MOUSE	tr|A0A140LHR4|A0A140LHR4_MOUSE;sp|P19324|SERPH_MOUSE;tr|A0A140LHK0|A0A140LHK0_MOUSE	>tr|A0A140LHR4|A0A140LHR4_MOUSE Serpin H1 (Fragment) OS=Mus musculus OX=10090 GN=Serpinh1 PE=1 SV=1;>sp|P19324|SERPH_MOUSE Serpin H1 OS=Mus musculus OX=10090 GN=Serpinh1 PE=1 SV=3;>tr|A0A140LHK0|A0A140LHK0_MOUSE Serpin H1 (Fragment) OS=Mus musculus OX=1009	2	14.8	21.648	6.4502	0	1	2	2	3	1	962470	779480	1203600	2154200	1131100	0
sp|P19426|NELFE_MOUSE	sp|P19426|NELFE_MOUSE;tr|G3UY39|G3UY39_MOUSE	>sp|P19426|NELFE_MOUSE Negative elongation factor E OS=Mus musculus OX=10090 GN=Nelfe PE=1 SV=2;>tr|G3UY39|G3UY39_MOUSE Negative elongation factor E (Fragment) OS=Mus musculus OX=10090 GN=Nelfe PE=1 SV=1	6	24.8	42.554	20.854	5	5	5	6	6	2	1741200	2452300	3177900	2166000	3131600	1547500
sp|P19536|COX5B_MOUSE	sp|P19536|COX5B_MOUSE;tr|Q9D881|Q9D881_MOUSE	>sp|P19536|COX5B_MOUSE Cytochrome c oxidase subunit 5B, mitochondrial OS=Mus musculus OX=10090 GN=Cox5b PE=1 SV=1;>tr|Q9D881|Q9D881_MOUSE Cytochrome c oxidase subunit 5B, mitochondrial OS=Mus musculus OX=10090 GN=Gm11273 PE=1 SV=1	6	29.7	13.813	27.556	14	13	13	15	17	13	87668000	79439000	77249000	115340000	139760000	116020000
sp|P19783|COX41_MOUSE	sp|P19783|COX41_MOUSE	>sp|P19783|COX41_MOUSE Cytochrome c oxidase subunit 4 isoform 1, mitochondrial OS=Mus musculus OX=10090 GN=Cox4i1 PE=1 SV=2	9	42	19.53	73.695	17	15	18	15	15	18	76817000	61742000	73741000	68525000	68435000	72418000
sp|P19973|LSP1_MOUSE	sp|P19973|LSP1_MOUSE	>sp|P19973|LSP1_MOUSE Lymphocyte-specific protein 1 OS=Mus musculus OX=10090 GN=Lsp1 PE=1 SV=2	2	57.9	36.713	323.31	45	54	51	60	55	55	244080000	305770000	313320000	495040000	478560000	468270000
sp|P20029|BIP_MOUSE	sp|P20029|BIP_MOUSE	>sp|P20029|BIP_MOUSE Endoplasmic reticulum chaperone BiP OS=Mus musculus OX=10090 GN=Hspa5 PE=1 SV=3	34	49	72.421	323.31	97	96	112	109	104	109	154620000	177200000	161730000	216500000	176480000	191090000
sp|P20060|HEXB_MOUSE	sp|P20060|HEXB_MOUSE	>sp|P20060|HEXB_MOUSE Beta-hexosaminidase subunit beta OS=Mus musculus OX=10090 GN=Hexb PE=1 SV=2	11	20.3	61.115	37.822	8	11	10	9	10	7	4047200	4121400	2698500	6066900	2282800	3155600
sp|P20065|TYB4_MOUSE	sp|P20065|TYB4_MOUSE	>sp|P20065|TYB4_MOUSE Thymosin beta-4 OS=Mus musculus OX=10090 GN=Tmsb4x PE=1 SV=1	4	70	5.6794	123.36	18	22	18	22	21	28	3315800000	3819600000	3929200000	5574500000	4216900000	4778100000
sp|P20108|PRDX3_MOUSE	sp|P20108|PRDX3_MOUSE	>sp|P20108|PRDX3_MOUSE Thioredoxin-dependent peroxide reductase, mitochondrial OS=Mus musculus OX=10090 GN=Prdx3 PE=1 SV=1	6	30.4	28.127	53.744	7	5	10	8	10	8	10309000	12435000	9246300	13886000	13022000	12380000
sp|P20152|VIME_MOUSE	sp|P20152|VIME_MOUSE;tr|A0A0A6YWC8|A0A0A6YWC8_MOUSE	>sp|P20152|VIME_MOUSE Vimentin OS=Mus musculus OX=10090 GN=Vim PE=1 SV=3;>tr|A0A0A6YWC8|A0A0A6YWC8_MOUSE Vimentin OS=Mus musculus OX=10090 GN=Vim PE=1 SV=1	38	64.2	53.687	323.31	114	132	123	140	139	146	345560000	411000000	423440000	660850000	515790000	572670000
sp|P21550|ENOB_MOUSE	sp|P21550|ENOB_MOUSE;tr|J3QPZ9|J3QPZ9_MOUSE	>sp|P21550|ENOB_MOUSE Beta-enolase OS=Mus musculus OX=10090 GN=Eno3 PE=1 SV=3;>tr|J3QPZ9|J3QPZ9_MOUSE Beta-enolase (Fragment) OS=Mus musculus OX=10090 GN=Eno3 PE=1 SV=1	7	36.4	47.024	31.619	3	4	3	7	5	2	5143700	6379300	6131800	9283800	7417700	5577700
sp|P21619|LMNB2_MOUSE	sp|P21619|LMNB2_MOUSE;tr|A0A0R4J0Q5|A0A0R4J0Q5_MOUSE	>sp|P21619|LMNB2_MOUSE Lamin-B2 OS=Mus musculus OX=10090 GN=Lmnb2 PE=1 SV=2;>tr|A0A0R4J0Q5|A0A0R4J0Q5_MOUSE Lamin-B2 OS=Mus musculus OX=10090 GN=Lmnb2 PE=1 SV=1	22	52.3	67.317	172.93	26	26	22	30	30	29	35643000	24252000	21409000	34926000	21960000	33353000
sp|P21981|TGM2_MOUSE	sp|P21981|TGM2_MOUSE	>sp|P21981|TGM2_MOUSE Protein-glutamine gamma-glutamyltransferase 2 OS=Mus musculus OX=10090 GN=Tgm2 PE=1 SV=4	6	12.8	77.06	28.053	8	6	5	5	6	5	2429000	3182000	2834400	2618400	2544300	2482900
sp|P22366|MYD88_MOUSE	sp|P22366|MYD88_MOUSE;tr|F6SPW1|F6SPW1_MOUSE	>sp|P22366|MYD88_MOUSE Myeloid differentiation primary response protein MyD88 OS=Mus musculus OX=10090 GN=Myd88 PE=1 SV=3;>tr|F6SPW1|F6SPW1_MOUSE Myeloid differentiation primary response protein MyD88 (Fragment) OS=Mus musculus OX=10090 GN=Myd88 PE=1 SV=2	2	6.8	33.753	4.5637	2	4	2	1	2	1	242050	286370	257960	141110	178030	491200
sp|P22646|CD3E_MOUSE	sp|P22646|CD3E_MOUSE	>sp|P22646|CD3E_MOUSE T-cell surface glycoprotein CD3 epsilon chain OS=Mus musculus OX=10090 GN=Cd3e PE=1 SV=2	2	12.7	21.393	6.1271	2	2	3	1	3	2	1566200	3130900	2303500	1707500	5452400	2024500
tr|A0A0U1RQ85|A0A0U1RQ85_MOUSE	tr|A0A0U1RQ85|A0A0U1RQ85_MOUSE;sp|P22682|CBL_MOUSE;tr|A0A0X1KG61|A0A0X1KG61_MOUSE;tr|A0A0U1RP47|A0A0U1RP47_MOUSE	>tr|A0A0U1RQ85|A0A0U1RQ85_MOUSE E3 ubiquitin-protein ligase CBL OS=Mus musculus OX=10090 GN=Cbl PE=1 SV=1;>sp|P22682|CBL_MOUSE E3 ubiquitin-protein ligase CBL OS=Mus musculus OX=10090 GN=Cbl PE=1 SV=3;>tr|A0A0X1KG61|A0A0X1KG61_MOUSE E3 ubiquitin-protein li	8	14.7	98.508	25.526	3	7	10	4	9	5	1280400	2011800	2375300	2610500	2361900	2255200
sp|P23116|EIF3A_MOUSE	sp|P23116|EIF3A_MOUSE	>sp|P23116|EIF3A_MOUSE Eukaryotic translation initiation factor 3 subunit A OS=Mus musculus OX=10090 GN=Eif3a PE=1 SV=5	23	19.7	161.93	92.392	21	20	23	20	20	28	6304000	6894900	6483900	8274400	7773800	6493900
tr|Q9DCC5|Q9DCC5_MOUSE	tr|Q9DCC5|Q9DCC5_MOUSE;sp|P23198|CBX3_MOUSE	>tr|Q9DCC5|Q9DCC5_MOUSE Cbx3 protein OS=Mus musculus OX=10090 GN=Cbx3 PE=1 SV=1;>sp|P23198|CBX3_MOUSE Chromobox protein homolog 3 OS=Mus musculus OX=10090 GN=Cbx3 PE=1 SV=2	7	43.7	20.811	72.236	31	34	29	39	33	33	359340000	542970000	432520000	733260000	610590000	597070000
sp|P23298|KPCL_MOUSE	sp|P23298|KPCL_MOUSE	>sp|P23298|KPCL_MOUSE Protein kinase C eta type OS=Mus musculus OX=10090 GN=Prkch PE=1 SV=2	2	3.5	77.918	4.8018	2	3	1	1	0	3	226030	407620	56485	409130	224790	50137
tr|A0A0R4J187|A0A0R4J187_MOUSE	tr|A0A0R4J187|A0A0R4J187_MOUSE;sp|P23475|XRCC6_MOUSE;tr|A0A2R8VHZ9|A0A2R8VHZ9_MOUSE	>tr|A0A0R4J187|A0A0R4J187_MOUSE X-ray repair cross-complementing protein 6 OS=Mus musculus OX=10090 GN=Xrcc6 PE=1 SV=1;>sp|P23475|XRCC6_MOUSE X-ray repair cross-complementing protein 6 OS=Mus musculus OX=10090 GN=Xrcc6 PE=1 SV=5;>tr|A0A2R8VHZ9|A0A2R8VHZ9_M	5	10	69.484	16.308	3	4	5	3	2	5	324260	832370	585830	696820	2440200	2608300
tr|Q543K9|Q543K9_MOUSE	tr|Q543K9|Q543K9_MOUSE;sp|P23492|PNPH_MOUSE;tr|A0A2I3BQH2|A0A2I3BQH2_MOUSE	>tr|Q543K9|Q543K9_MOUSE Purine nucleoside phosphorylase OS=Mus musculus OX=10090 GN=Pnp PE=1 SV=1;>sp|P23492|PNPH_MOUSE Purine nucleoside phosphorylase OS=Mus musculus OX=10090 GN=Pnp PE=1 SV=2;>tr|A0A2I3BQH2|A0A2I3BQH2_MOUSE Predicted gene, 49342 (Fragmen	9	43.3	32.263	101.07	9	8	9	6	9	8	12888000	16226000	9885200	21632000	16554000	18764000
sp|P23506|PIMT_MOUSE	sp|P23506|PIMT_MOUSE;tr|F7D432|F7D432_MOUSE;tr|E9PWE0|E9PWE0_MOUSE;tr|E0CYV0|E0CYV0_MOUSE;tr|F6V9F1|F6V9F1_MOUSE	>sp|P23506|PIMT_MOUSE Protein-L-isoaspartate(D-aspartate) O-methyltransferase OS=Mus musculus OX=10090 GN=Pcmt1 PE=1 SV=3;>tr|F7D432|F7D432_MOUSE Protein-L-isoaspartate O-methyltransferase (Fragment) OS=Mus musculus OX=10090 GN=Pcmt1 PE=1 SV=1;>tr|E9PWE0|E	10	63	24.634	82.033	8	8	6	7	7	7	8530200	13010000	13457000	12378000	8762800	9294800
sp|P23591|FCL_MOUSE	sp|P23591|FCL_MOUSE;tr|A0A2R8VHD0|A0A2R8VHD0_MOUSE;tr|A0A2R8W6P6|A0A2R8W6P6_MOUSE;tr|A0A2R8VI39|A0A2R8VI39_MOUSE	>sp|P23591|FCL_MOUSE GDP-L-fucose synthase OS=Mus musculus OX=10090 GN=Tsta3 PE=1 SV=3;>tr|A0A2R8VHD0|A0A2R8VHD0_MOUSE GDP-L-fucose synthase OS=Mus musculus OX=10090 GN=Tsta3 PE=1 SV=1;>tr|A0A2R8W6P6|A0A2R8W6P6_MOUSE GDP-L-fucose synthase OS=Mus musculus O	7	31.5	35.877	36.166	5	5	3	3	5	7	3429100	5444000	4991400	4216900	5696000	6062100
tr|F6TWX0|F6TWX0_MOUSE	tr|F6TWX0|F6TWX0_MOUSE;tr|F7DFJ2|F7DFJ2_MOUSE;tr|A0A0R4J1Y8|A0A0R4J1Y8_MOUSE;tr|E0CYF3|E0CYF3_MOUSE;sp|P23708|NFYA_MOUSE;tr|Q9DBV7|Q9DBV7_MOUSE	>tr|F6TWX0|F6TWX0_MOUSE Nuclear transcription factor Y subunit alpha (Fragment) OS=Mus musculus OX=10090 GN=Nfya PE=1 SV=1;>tr|F7DFJ2|F7DFJ2_MOUSE Nuclear transcription factor Y subunit alpha (Fragment) OS=Mus musculus OX=10090 GN=Nfya PE=1 SV=1;>tr|A0A0R4	2	20.2	22.649	15.743	3	4	5	3	5	4	10637000	14924000	24728000	40530000	18341000	20670000
sp|P23780|BGAL_MOUSE	sp|P23780|BGAL_MOUSE	>sp|P23780|BGAL_MOUSE Beta-galactosidase OS=Mus musculus OX=10090 GN=Glb1 PE=1 SV=1	3	5.1	73.12	9.1431	3	1	2	4	5	4	1117500	342210	1204600	1950300	2498600	1874100
tr|A0A140LHP8|A0A140LHP8_MOUSE	tr|A0A140LHP8|A0A140LHP8_MOUSE;tr|A0A140LJA4|A0A140LJA4_MOUSE;tr|A0A140LIX2|A0A140LIX2_MOUSE;tr|A0A1B0GQW5|A0A1B0GQW5_MOUSE;tr|A0A140LI82|A0A140LI82_MOUSE;sp|P23906|IRF2_MOUSE	>tr|A0A140LHP8|A0A140LHP8_MOUSE Interferon regulatory factor 2 (Fragment) OS=Mus musculus OX=10090 GN=Irf2 PE=1 SV=1;>tr|A0A140LJA4|A0A140LJA4_MOUSE Interferon regulatory factor 2 (Fragment) OS=Mus musculus OX=10090 GN=Irf2 PE=1 SV=1;>tr|A0A140LIX2|A0A140L	1	14.8	10.502	3.4627	0	0	0	1	2	0	1453000	0	0	1813100	1966700	0
sp|P23949|TISD_MOUSE	sp|P23949|TISD_MOUSE	>sp|P23949|TISD_MOUSE mRNA decay activator protein ZFP36L2 OS=Mus musculus OX=10090 GN=Zfp36l2 PE=1 SV=2	1	4.1	50.069	3.1628	1	2	0	0	0	1	414990	862610	606240	0	433350	420960
tr|E9QNL8|E9QNL8_MOUSE	tr|E9QNL8|E9QNL8_MOUSE;tr|E9Q5M7|E9Q5M7_MOUSE;sp|P24063|ITAL_MOUSE;tr|D3Z627|D3Z627_MOUSE;tr|D3YW95|D3YW95_MOUSE	>tr|E9QNL8|E9QNL8_MOUSE Integrin alpha-L OS=Mus musculus OX=10090 GN=Itgal PE=1 SV=1;>tr|E9Q5M7|E9Q5M7_MOUSE Integrin alpha-L OS=Mus musculus OX=10090 GN=Itgal PE=1 SV=1;>sp|P24063|ITAL_MOUSE Integrin alpha-L OS=Mus musculus OX=10090 GN=Itgal PE=1 SV=2;>tr	13	13.4	128.21	38.988	6	7	5	11	12	14	2205900	2241100	2085600	4105200	4078300	3738900
sp|P24161|CD3Z_MOUSE	sp|P24161|CD3Z_MOUSE;tr|Q3UU54|Q3UU54_MOUSE;tr|A2MZG6|A2MZG6_MOUSE;tr|J3QMU3|J3QMU3_MOUSE	>sp|P24161|CD3Z_MOUSE T-cell surface glycoprotein CD3 zeta chain OS=Mus musculus OX=10090 GN=Cd247 PE=1 SV=1;>tr|Q3UU54|Q3UU54_MOUSE T-cell surface glycoprotein CD3 zeta chain OS=Mus musculus OX=10090 GN=Cd247 PE=1 SV=1;>tr|A2MZG6|A2MZG6_MOUSE CD3 theta OS	3	20.7	18.637	9.6798	3	1	1	3	3	2	6677400	1926800	1017900	7088200	4609100	4204000
sp|P24270|CATA_MOUSE	sp|P24270|CATA_MOUSE;tr|A2AL20|A2AL20_MOUSE	>sp|P24270|CATA_MOUSE Catalase OS=Mus musculus OX=10090 GN=Cat PE=1 SV=4;>tr|A2AL20|A2AL20_MOUSE Catalase OS=Mus musculus OX=10090 GN=Cat PE=1 SV=1	16	38.1	59.795	70.356	12	11	9	12	15	9	7611600	6639000	8499200	7382700	9318400	9188100
sp|P24369|PPIB_MOUSE	sp|P24369|PPIB_MOUSE	>sp|P24369|PPIB_MOUSE Peptidyl-prolyl cis-trans isomerase B OS=Mus musculus OX=10090 GN=Ppib PE=1 SV=2	7	37.5	23.713	25.429	7	10	9	9	7	10	19643000	23374000	18663000	23849000	20704000	19268000
sp|P24472|GSTA4_MOUSE	sp|P24472|GSTA4_MOUSE	>sp|P24472|GSTA4_MOUSE Glutathione S-transferase A4 OS=Mus musculus OX=10090 GN=Gsta4 PE=1 SV=3	6	22.5	25.564	16.98	7	6	9	6	6	7	10251000	17542000	18385000	17047000	12384000	15413000
sp|P24527|LKHA4_MOUSE	sp|P24527|LKHA4_MOUSE	>sp|P24527|LKHA4_MOUSE Leukotriene A-4 hydrolase OS=Mus musculus OX=10090 GN=Lta4h PE=1 SV=4	30	51.7	69.05	323.31	54	49	57	56	55	59	50448000	61917000	57216000	80442000	64468000	68956000
sp|P24547|IMDH2_MOUSE	sp|P24547|IMDH2_MOUSE;tr|A0A0A6YXS4|A0A0A6YXS4_MOUSE;tr|A0A0A6YY72|A0A0A6YY72_MOUSE	>sp|P24547|IMDH2_MOUSE Inosine-5-monophosphate dehydrogenase 2 OS=Mus musculus OX=10090 GN=Impdh2 PE=1 SV=2;>tr|A0A0A6YXS4|A0A0A6YXS4_MOUSE Inosine-5-monophosphate dehydrogenase 2 (Fragment) OS=Mus musculus OX=10090 GN=Impdh2 PE=1 SV=1;>tr|A0A0A6YY72|A0A	12	26.8	55.814	56.185	9	10	11	12	12	10	8102100	9098900	8309000	9654700	10845000	13065000
sp|P24668|MPRD_MOUSE	sp|P24668|MPRD_MOUSE	>sp|P24668|MPRD_MOUSE Cation-dependent mannose-6-phosphate receptor OS=Mus musculus OX=10090 GN=M6pr PE=1 SV=1	2	11.5	31.172	42.846	1	0	3	0	1	0	1670600	2774000	3188400	3213900	2114500	2141300
tr|A2A9P6|A2A9P6_MOUSE	tr|A2A9P6|A2A9P6_MOUSE;sp|P24788|CD11B_MOUSE	>tr|A2A9P6|A2A9P6_MOUSE Cyclin-dependent kinase 11B OS=Mus musculus OX=10090 GN=Cdk11b PE=1 SV=1;>sp|P24788|CD11B_MOUSE Cyclin-dependent kinase 11B OS=Mus musculus OX=10090 GN=Cdk11b PE=1 SV=2	8	12.5	87.319	20.154	4	4	6	5	4	4	1570500	3173700	2056400	2747100	2773000	2713000
sp|P25206|MCM3_MOUSE	sp|P25206|MCM3_MOUSE	>sp|P25206|MCM3_MOUSE DNA replication licensing factor MCM3 OS=Mus musculus OX=10090 GN=Mcm3 PE=1 SV=2	20	36	91.545	129.17	18	20	26	27	21	19	5775800	11222000	7485400	9616400	7867800	7511600
tr|A0A0A0MQM6|A0A0A0MQM6_MOUSE	tr|A0A0A0MQM6|A0A0A0MQM6_MOUSE;tr|I1E4X2|I1E4X2_MOUSE;tr|A0A0A0MQE0|A0A0A0MQE0_MOUSE;tr|E9Q6Z8|E9Q6Z8_MOUSE;sp|P25425|PO2F1_MOUSE;tr|F8VQL7|F8VQL7_MOUSE;tr|A0A0R4J1Z4|A0A0R4J1Z4_MOUSE	>tr|A0A0A0MQM6|A0A0A0MQM6_MOUSE POU domain protein (Fragment) OS=Mus musculus OX=10090 GN=Pou2f1 PE=1 SV=1;>tr|I1E4X2|I1E4X2_MOUSE POU domain protein OS=Mus musculus OX=10090 GN=Pou2f1 PE=1 SV=1;>tr|A0A0A0MQE0|A0A0A0MQE0_MOUSE POU domain protein OS=Mus mus	3	8.3	61.017	10.419	1	1	0	2	3	1	1182500	1798400	2145400	2711800	1702600	2923600
sp|P25444|RS2_MOUSE	sp|P25444|RS2_MOUSE;tr|D3YVC1|D3YVC1_MOUSE;tr|D3YWJ3|D3YWJ3_MOUSE	>sp|P25444|RS2_MOUSE 40S ribosomal protein S2 OS=Mus musculus OX=10090 GN=Rps2 PE=1 SV=3;>tr|D3YVC1|D3YVC1_MOUSE 40S ribosomal protein S2 (Fragment) OS=Mus musculus OX=10090 GN=Rps2 PE=1 SV=1;>tr|D3YWJ3|D3YWJ3_MOUSE 40S ribosomal protein S2 OS=Mus musculus	4	15.4	31.231	8.3345	4	1	2	1	2	4	4922100	3924500	5436900	3612600	4161300	4362700
sp|P25799|NFKB1_MOUSE	sp|P25799|NFKB1_MOUSE	>sp|P25799|NFKB1_MOUSE Nuclear factor NF-kappa-B p105 subunit OS=Mus musculus OX=10090 GN=Nfkb1 PE=1 SV=2	12	16.1	105.61	72.512	5	10	7	11	5	10	3311000	4722000	3137700	6865700	3524500	5070300
tr|A2AWT6|A2AWT6_MOUSE	tr|A2AWT6|A2AWT6_MOUSE;tr|A2AWT7|A2AWT7_MOUSE;tr|A2AWT5|A2AWT5_MOUSE;sp|P25976|UBF1_MOUSE	>tr|A2AWT6|A2AWT6_MOUSE Nucleolar transcription factor 1 OS=Mus musculus OX=10090 GN=Ubtf PE=1 SV=1;>tr|A2AWT7|A2AWT7_MOUSE Nucleolar transcription factor 1 OS=Mus musculus OX=10090 GN=Ubtf PE=1 SV=1;>tr|A2AWT5|A2AWT5_MOUSE Nucleolar transcription factor 1	14	22.8	85.009	66.193	14	13	14	16	11	16	9593400	10793000	9769500	10015000	11060000	12928000
sp|P26011|ITB7_MOUSE	sp|P26011|ITB7_MOUSE	>sp|P26011|ITB7_MOUSE Integrin beta-7 OS=Mus musculus OX=10090 GN=Itgb7 PE=1 SV=2	3	5	87.411	7.3119	0	0	0	2	2	2	118080	232810	159010	486790	459820	658690
sp|P26039|TLN1_MOUSE	sp|P26039|TLN1_MOUSE	>sp|P26039|TLN1_MOUSE Talin-1 OS=Mus musculus OX=10090 GN=Tln1 PE=1 SV=2	68	37.7	269.82	323.31	79	103	112	99	90	107	16975000	21225000	19925000	28702000	21999000	23920000
sp|P26040|EZRI_MOUSE	sp|P26040|EZRI_MOUSE	>sp|P26040|EZRI_MOUSE Ezrin OS=Mus musculus OX=10090 GN=Ezr PE=1 SV=3	6	23.4	69.406	68.47	5	5	6	5	5	7	10325000	10990000	10726000	15394000	14936000	12033000
sp|P26041|MOES_MOUSE	sp|P26041|MOES_MOUSE	>sp|P26041|MOES_MOUSE Moesin OS=Mus musculus OX=10090 GN=Msn PE=1 SV=3	23	54.9	67.766	323.31	81	84	89	93	91	86	195930000	204030000	198220000	222790000	208210000	214510000
sp|P26043|RADI_MOUSE	sp|P26043|RADI_MOUSE;tr|Q7TSG6|Q7TSG6_MOUSE	>sp|P26043|RADI_MOUSE Radixin OS=Mus musculus OX=10090 GN=Rdx PE=1 SV=3;>tr|Q7TSG6|Q7TSG6_MOUSE Radixin OS=Mus musculus OX=10090 GN=Rdx PE=1 SV=1	7	30.2	68.542	34.012	7	8	6	5	12	10	5983700	6056500	3452400	6584000	12563000	7929100
sp|P26187|MGMT_MOUSE	sp|P26187|MGMT_MOUSE	>sp|P26187|MGMT_MOUSE Methylated-DNA--protein-cysteine methyltransferase OS=Mus musculus OX=10090 GN=Mgmt PE=1 SV=3	2	10.4	22.434	3.7004	0	0	1	1	2	2	184480	0	704160	360500	316470	889430
sp|P26323|FLI1_MOUSE	sp|P26323|FLI1_MOUSE;tr|V9GX50|V9GX50_MOUSE	>sp|P26323|FLI1_MOUSE Friend leukemia integration 1 transcription factor OS=Mus musculus OX=10090 GN=Fli1 PE=1 SV=1;>tr|V9GX50|V9GX50_MOUSE Friend leukemia integration 1 transcription factor (Fragment) OS=Mus musculus OX=10090 GN=Fli1 PE=1 SV=8	4	15.5	51.001	14.138	4	4	6	5	5	6	1444600	1971100	1164200	1472900	2024900	2669600
sp|P26350|PTMA_MOUSE	sp|P26350|PTMA_MOUSE;tr|A0A087WP98|A0A087WP98_MOUSE;tr|A0A087WPN6|A0A087WPN6_MOUSE	>sp|P26350|PTMA_MOUSE Prothymosin alpha OS=Mus musculus OX=10090 GN=Ptma PE=1 SV=2;>tr|A0A087WP98|A0A087WP98_MOUSE Prothymosin alpha OS=Mus musculus OX=10090 GN=Ptma PE=1 SV=1;>tr|A0A087WPN6|A0A087WPN6_MOUSE Prothymosin alpha OS=Mus musculus OX=10090 GN=Pt	3	27	12.254	67.62	12	12	13	11	14	14	1230200000	1841200000	1444600000	1970700000	1728300000	1813200000
tr|Q80XR5|Q80XR5_MOUSE	tr|Q80XR5|Q80XR5_MOUSE;sp|P26369|U2AF2_MOUSE;tr|Q3KQM4|Q3KQM4_MOUSE	>tr|Q80XR5|Q80XR5_MOUSE U2 snRNP auxiliary factor large subunit OS=Mus musculus OX=10090 GN=U2af2 PE=1 SV=1;>sp|P26369|U2AF2_MOUSE Splicing factor U2AF 65 kDa subunit OS=Mus musculus OX=10090 GN=U2af2 PE=1 SV=3;>tr|Q3KQM4|Q3KQM4_MOUSE U2 snRNP auxiliary fa	8	34.4	53.12	37.974	4	10	12	13	9	11	6494500	11436000	12216000	15633000	10560000	12412000
sp|P26443|DHE3_MOUSE	sp|P26443|DHE3_MOUSE	>sp|P26443|DHE3_MOUSE Glutamate dehydrogenase 1, mitochondrial OS=Mus musculus OX=10090 GN=Glud1 PE=1 SV=1	19	36.4	61.336	235.96	28	34	34	37	39	32	26675000	41859000	37549000	48531000	46402000	50912000
tr|Q80UI5|Q80UI5_MOUSE	tr|Q80UI5|Q80UI5_MOUSE;sp|P26450|P85A_MOUSE;tr|A0A087WQM2|A0A087WQM2_MOUSE	>tr|Q80UI5|Q80UI5_MOUSE Phosphatidylinositol 3-kinase regulatory subunit alpha OS=Mus musculus OX=10090 GN=Pik3r1 PE=1 SV=1;>sp|P26450|P85A_MOUSE Phosphatidylinositol 3-kinase regulatory subunit alpha OS=Mus musculus OX=10090 GN=Pik3r1 PE=1 SV=2;>tr|A0A087	6	16.3	53.398	17.007	1	3	2	4	1	4	1934700	2603100	3181300	3325300	1732800	3240000
sp|P26516|PSMD7_MOUSE	sp|P26516|PSMD7_MOUSE	>sp|P26516|PSMD7_MOUSE 26S proteasome non-ATPase regulatory subunit 7 OS=Mus musculus OX=10090 GN=Psmd7 PE=1 SV=2	7	32.4	36.539	25.473	4	3	5	5	4	3	7911300	11318000	8654100	9114100	7915500	7799900
sp|P26638|SYSC_MOUSE	sp|P26638|SYSC_MOUSE;tr|Q8C483|Q8C483_MOUSE;tr|A2AFS0|A2AFS0_MOUSE;tr|A2AFS1|A2AFS1_MOUSE	>sp|P26638|SYSC_MOUSE Serine--tRNA ligase, cytoplasmic OS=Mus musculus OX=10090 GN=Sars PE=1 SV=3;>tr|Q8C483|Q8C483_MOUSE Serine--tRNA ligase, cytoplasmic OS=Mus musculus OX=10090 GN=Sars PE=1 SV=1;>tr|A2AFS0|A2AFS0_MOUSE Serine--tRNA ligase, cytoplasmic (	10	23.8	58.388	43.66	11	12	9	10	10	9	6167000	7338600	6087300	7509500	5382300	5373600
sp|P26645|MARCS_MOUSE	sp|P26645|MARCS_MOUSE	>sp|P26645|MARCS_MOUSE Myristoylated alanine-rich C-kinase substrate OS=Mus musculus OX=10090 GN=Marcks PE=1 SV=2	2	11	29.661	5.5166	2	0	1	0	1	1	2158100	721070	797630	2315600	1317100	954640
sp|P26883|FKB1A_MOUSE	sp|P26883|FKB1A_MOUSE;tr|F6X9I3|F6X9I3_MOUSE	>sp|P26883|FKB1A_MOUSE Peptidyl-prolyl cis-trans isomerase FKBP1A OS=Mus musculus OX=10090 GN=Fkbp1a PE=1 SV=2;>tr|F6X9I3|F6X9I3_MOUSE Peptidylprolyl isomerase (Fragment) OS=Mus musculus OX=10090 GN=Fkbp1a PE=1 SV=1	6	55.6	11.922	130.5	10	12	12	11	11	14	318480000	287410000	221080000	325050000	309550000	360700000
sp|P27048|RSMB_MOUSE	sp|P27048|RSMB_MOUSE;sp|P63163|RSMN_MOUSE	>sp|P27048|RSMB_MOUSE Small nuclear ribonucleoprotein-associated protein B OS=Mus musculus OX=10090 GN=Snrpb PE=1 SV=1;>sp|P63163|RSMN_MOUSE Small nuclear ribonucleoprotein-associated protein N OS=Mus musculus OX=10090 GN=Snrpn PE=1 SV=1	5	16	23.656	83.129	10	11	11	8	11	13	8637900	7157600	9076800	16241000	11557000	16011000
sp|P27546|MAP4_MOUSE	sp|P27546|MAP4_MOUSE	>sp|P27546|MAP4_MOUSE Microtubule-associated protein 4 OS=Mus musculus OX=10090 GN=Map4 PE=1 SV=3	15	25.1	117.43	45.861	4	7	11	13	12	10	2640600	3278800	3683900	6475900	5447900	4634500
tr|V9GXE2|V9GXE2_MOUSE	tr|V9GXE2|V9GXE2_MOUSE;tr|E9PWI8|E9PWI8_MOUSE;sp|P27577|ETS1_MOUSE;tr|V9GX28|V9GX28_MOUSE	>tr|V9GXE2|V9GXE2_MOUSE Protein C-ets-1 OS=Mus musculus OX=10090 GN=Ets1 PE=1 SV=1;>tr|E9PWI8|E9PWI8_MOUSE Protein C-ets-1 OS=Mus musculus OX=10090 GN=Ets1 PE=1 SV=1;>sp|P27577|ETS1_MOUSE Protein C-ets-1 OS=Mus musculus OX=10090 GN=Ets1 PE=1 SV=2;>tr|V9GX2	2	9.8	25.63	7.8484	2	1	1	1	3	3	2071500	1828900	2069800	2330200	2856600	3232500
sp|P27612|PLAP_MOUSE	sp|P27612|PLAP_MOUSE	>sp|P27612|PLAP_MOUSE Phospholipase A-2-activating protein OS=Mus musculus OX=10090 GN=Plaa PE=1 SV=4	15	27.1	87.22	58.254	12	9	15	12	14	10	3685700	4331800	4879700	4807400	5538800	4604900
sp|P27641|XRCC5_MOUSE	sp|P27641|XRCC5_MOUSE	>sp|P27641|XRCC5_MOUSE X-ray repair cross-complementing protein 5 OS=Mus musculus OX=10090 GN=Xrcc5 PE=1 SV=4	8	14.9	83.056	22.564	5	8	7	8	7	6	1396500	3560500	2514200	2520000	3017500	3104800
sp|P27659|RL3_MOUSE	sp|P27659|RL3_MOUSE;tr|A0A2R8VHN4|A0A2R8VHN4_MOUSE	>sp|P27659|RL3_MOUSE 60S ribosomal protein L3 OS=Mus musculus OX=10090 GN=Rpl3 PE=1 SV=3;>tr|A0A2R8VHN4|A0A2R8VHN4_MOUSE 60S ribosomal protein L3 (Fragment) OS=Mus musculus OX=10090 GN=Rpl3 PE=1 SV=1	6	16.4	46.109	32.542	8	9	8	9	8	4	12313000	13882000	14303000	14806000	8839500	11979000
sp|P27773|PDIA3_MOUSE	sp|P27773|PDIA3_MOUSE	>sp|P27773|PDIA3_MOUSE Protein disulfide-isomerase A3 OS=Mus musculus OX=10090 GN=Pdia3 PE=1 SV=2	33	58.6	56.678	323.31	78	86	77	102	92	96	235540000	283630000	247380000	372820000	322630000	343880000
tr|Q8VDU4|Q8VDU4_MOUSE	tr|Q8VDU4|Q8VDU4_MOUSE;tr|E9PXI0|E9PXI0_MOUSE;sp|P27870|VAV_MOUSE	>tr|Q8VDU4|Q8VDU4_MOUSE Proto-oncogene vav OS=Mus musculus OX=10090 GN=Vav1 PE=1 SV=1;>tr|E9PXI0|E9PXI0_MOUSE Proto-oncogene vav OS=Mus musculus OX=10090 GN=Vav1 PE=1 SV=1;>sp|P27870|VAV_MOUSE Proto-oncogene vav OS=Mus musculus OX=10090 GN=Vav1 PE=1 SV=1	7	9.6	93.868	18.897	5	4	3	4	6	6	1297800	1312400	607840	1917100	1763700	1890900
sp|P28063|PSB8_MOUSE	sp|P28063|PSB8_MOUSE;tr|G3UZW8|G3UZW8_MOUSE	>sp|P28063|PSB8_MOUSE Proteasome subunit beta type-8 OS=Mus musculus OX=10090 GN=Psmb8 PE=1 SV=2;>tr|G3UZW8|G3UZW8_MOUSE Proteasome subunit beta (Fragment) OS=Mus musculus OX=10090 GN=Psmb8 PE=1 SV=2	9	37.3	30.26	68.169	10	10	8	10	11	12	18221000	20316000	18079000	23848000	17136000	23166000
sp|P28271|ACOC_MOUSE	sp|P28271|ACOC_MOUSE	>sp|P28271|ACOC_MOUSE Cytoplasmic aconitate hydratase OS=Mus musculus OX=10090 GN=Aco1 PE=1 SV=3	8	11.5	98.124	22.077	5	7	3	4	5	7	1377500	1638500	930380	1967800	1427700	1814500
sp|P28352|APEX1_MOUSE	sp|P28352|APEX1_MOUSE;tr|D3Z124|D3Z124_MOUSE;tr|D3Z6R9|D3Z6R9_MOUSE;tr|F6QA74|F6QA74_MOUSE	>sp|P28352|APEX1_MOUSE DNA-(apurinic or apyrimidinic site) lyase OS=Mus musculus OX=10090 GN=Apex1 PE=1 SV=2;>tr|D3Z124|D3Z124_MOUSE DNA-(apurinic or apyrimidinic site) lyase (Fragment) OS=Mus musculus OX=10090 GN=Apex1 PE=1 SV=1;>tr|D3Z6R9|D3Z6R9_MOUSE DN	5	19.9	35.49	20.138	2	9	7	7	10	4	5736200	10903000	14806000	13113000	8557000	7804300
sp|P28474|ADHX_MOUSE	sp|P28474|ADHX_MOUSE	>sp|P28474|ADHX_MOUSE Alcohol dehydrogenase class-3 OS=Mus musculus OX=10090 GN=Adh5 PE=1 SV=3	10	27.5	39.547	27.078	4	5	7	9	7	6	6254800	7627300	6530000	15055000	6815400	8606500
sp|P28574|MAX_MOUSE	sp|P28574|MAX_MOUSE;tr|A0A1W2P7P4|A0A1W2P7P4_MOUSE	>sp|P28574|MAX_MOUSE Protein max OS=Mus musculus OX=10090 GN=Max PE=1 SV=2;>tr|A0A1W2P7P4|A0A1W2P7P4_MOUSE Protein max OS=Mus musculus OX=10090 GN=Max PE=1 SV=1	3	25.6	18.245	8.9131	2	2	2	2	2	3	8400700	8537000	7092200	8192300	8594300	8304600
tr|Q3TF41|Q3TF41_MOUSE	tr|Q3TF41|Q3TF41_MOUSE;tr|Q8BSH9|Q8BSH9_MOUSE;sp|P28656|NP1L1_MOUSE	>tr|Q3TF41|Q3TF41_MOUSE Nucleosome assembly protein 1-like 1 OS=Mus musculus OX=10090 GN=Nap1l1 PE=1 SV=1;>tr|Q8BSH9|Q8BSH9_MOUSE Nucleosome assembly protein 1-like 1 OS=Mus musculus OX=10090 GN=Nap1l1 PE=1 SV=1;>sp|P28656|NP1L1_MOUSE Nucleosome assembly p	7	20.9	42.732	40.478	11	13	11	15	12	14	25221000	27058000	24831000	52905000	24674000	37189000
sp|P28658|ATX10_MOUSE	sp|P28658|ATX10_MOUSE	>sp|P28658|ATX10_MOUSE Ataxin-10 OS=Mus musculus OX=10090 GN=Atxn10 PE=1 SV=2	3	9.5	53.706	9.6699	2	1	1	2	3	3	808050	1262900	1083800	1632500	1352200	1563600
sp|P28659|CELF1_MOUSE	sp|P28659|CELF1_MOUSE;tr|A0A0R4J0T5|A0A0R4J0T5_MOUSE	>sp|P28659|CELF1_MOUSE CUGBP Elav-like family member 1 OS=Mus musculus OX=10090 GN=Celf1 PE=1 SV=2;>tr|A0A0R4J0T5|A0A0R4J0T5_MOUSE CUG triplet repeat, RNA binding protein 1, isoform CRA_b OS=Mus musculus OX=10090 GN=Celf1 PE=1 SV=1	1	5.8	52.107	2.707	1	1	1	1	1	1	1264300	992220	1135600	1566700	1042800	1883300
sp|P28667|MRP_MOUSE	sp|P28667|MRP_MOUSE	>sp|P28667|MRP_MOUSE MARCKS-related protein OS=Mus musculus OX=10090 GN=Marcksl1 PE=1 SV=2	1	7.5	20.165	3.6357	1	0	1	1	1	0	3969500	4477700	4129600	4743000	4290500	3964600
tr|F8VQ42|F8VQ42_MOUSE	tr|F8VQ42|F8VQ42_MOUSE;sp|P28740|KIF2A_MOUSE;tr|E0CZ72|E0CZ72_MOUSE	>tr|F8VQ42|F8VQ42_MOUSE Kinesin-like protein (Fragment) OS=Mus musculus OX=10090 GN=Kif2a PE=1 SV=1;>sp|P28740|KIF2A_MOUSE Kinesin-like protein KIF2A OS=Mus musculus OX=10090 GN=Kif2a PE=1 SV=2;>tr|E0CZ72|E0CZ72_MOUSE Kinesin-like protein OS=Mus musculus O	3	6.7	75.968	7.7358	2	3	1	0	0	0	117860	372080	157700	554810	161470	268320
sp|P28843|DPP4_MOUSE	sp|P28843|DPP4_MOUSE	>sp|P28843|DPP4_MOUSE Dipeptidyl peptidase 4 OS=Mus musculus OX=10090 GN=Dpp4 PE=1 SV=3	3	5	87.436	12.012	6	1	4	2	2	3	1198400	1298000	1337600	1168800	1161700	885990
sp|P29341|PABP1_MOUSE	sp|P29341|PABP1_MOUSE;tr|Q9D4E6|Q9D4E6_MOUSE	>sp|P29341|PABP1_MOUSE Polyadenylate-binding protein 1 OS=Mus musculus OX=10090 GN=Pabpc1 PE=1 SV=2;>tr|Q9D4E6|Q9D4E6_MOUSE Polyadenylate-binding protein OS=Mus musculus OX=10090 GN=Pabpc6 PE=1 SV=1	12	27	70.67	150.03	26	26	28	26	27	29	26564000	29044000	23829000	33943000	24150000	24574000
sp|P29351|PTN6_MOUSE	sp|P29351|PTN6_MOUSE	>sp|P29351|PTN6_MOUSE Tyrosine-protein phosphatase non-receptor type 6 OS=Mus musculus OX=10090 GN=Ptpn6 PE=1 SV=2	18	38.7	67.558	61.217	16	16	17	12	12	12	8740400	9028500	7204900	5533800	5283300	7501600
tr|A0A1B0GR60|A0A1B0GR60_MOUSE	tr|A0A1B0GR60|A0A1B0GR60_MOUSE;tr|Q9CPX4|Q9CPX4_MOUSE;sp|P29391|FRIL1_MOUSE;sp|P49945|FRIL2_MOUSE	>tr|A0A1B0GR60|A0A1B0GR60_MOUSE Ferritin OS=Mus musculus OX=10090 GN=Ftl1 PE=1 SV=1;>tr|Q9CPX4|Q9CPX4_MOUSE Ferritin OS=Mus musculus OX=10090 GN=Ftl1 PE=1 SV=1;>sp|P29391|FRIL1_MOUSE Ferritin light chain 1 OS=Mus musculus OX=10090 GN=Ftl1 PE=1 SV=2;>sp|P49	6	55	17.999	38.924	10	10	7	6	6	8	9407800	14337000	10630000	13836000	14516000	14278000
sp|P29416|HEXA_MOUSE	sp|P29416|HEXA_MOUSE	>sp|P29416|HEXA_MOUSE Beta-hexosaminidase subunit alpha OS=Mus musculus OX=10090 GN=Hexa PE=1 SV=2	3	7.8	60.612	8.6548	3	1	1	2	1	1	762590	1794600	860390	1339000	842800	1587600
sp|P29452|CASP1_MOUSE	sp|P29452|CASP1_MOUSE	>sp|P29452|CASP1_MOUSE Caspase-1 OS=Mus musculus OX=10090 GN=Casp1 PE=1 SV=1	2	5	45.64	5.7492	1	1	2	2	0	1	474010	830860	506400	785330	538370	910220
sp|P29595|NEDD8_MOUSE	sp|P29595|NEDD8_MOUSE	>sp|P29595|NEDD8_MOUSE NEDD8 OS=Mus musculus OX=10090 GN=Nedd8 PE=1 SV=2	3	39.5	8.9723	10.708	0	2	2	2	2	5	13864000	12157000	8109500	10139000	9787900	13770000
sp|P29758|OAT_MOUSE	sp|P29758|OAT_MOUSE	>sp|P29758|OAT_MOUSE Ornithine aminotransferase, mitochondrial OS=Mus musculus OX=10090 GN=Oat PE=1 SV=1	7	21.4	48.354	26.795	5	6	6	9	8	7	4885000	5051200	10151000	7135600	9161000	7492000
sp|P30416|FKBP4_MOUSE	sp|P30416|FKBP4_MOUSE	>sp|P30416|FKBP4_MOUSE Peptidyl-prolyl cis-trans isomerase FKBP4 OS=Mus musculus OX=10090 GN=Fkbp4 PE=1 SV=5	11	26	51.572	49.591	11	12	10	14	13	13	5786500	6573200	6076500	10246000	8557200	10857000
sp|P30681|HMGB2_MOUSE	sp|P30681|HMGB2_MOUSE	>sp|P30681|HMGB2_MOUSE High mobility group protein B2 OS=Mus musculus OX=10090 GN=Hmgb2 PE=1 SV=3	12	43.8	24.162	117.97	23	29	28	16	21	23	426710000	609260000	574600000	336180000	406820000	422610000
sp|P31230|AIMP1_MOUSE	sp|P31230|AIMP1_MOUSE;tr|Q3UZG4|Q3UZG4_MOUSE	>sp|P31230|AIMP1_MOUSE Aminoacyl tRNA synthase complex-interacting multifunctional protein 1 OS=Mus musculus OX=10090 GN=Aimp1 PE=1 SV=2;>tr|Q3UZG4|Q3UZG4_MOUSE Aminoacyl tRNA synthase complex-interacting multifunctional protein 1 OS=Mus musculus OX=10090	6	29.4	33.997	27.136	4	7	9	15	12	9	6862500	9461600	9951600	11317000	14308000	13769000
sp|P31725|S10A9_MOUSE	sp|P31725|S10A9_MOUSE	>sp|P31725|S10A9_MOUSE Protein S100-A9 OS=Mus musculus OX=10090 GN=S100a9 PE=1 SV=3	2	23	13.049	27.752	6	7	8	4	3	3	55550000	54201000	35147000	18227000	21255000	16531000
sp|P31786|ACBP_MOUSE	sp|P31786|ACBP_MOUSE;tr|M0QWU8|M0QWU8_MOUSE;tr|Q4VWZ5|Q4VWZ5_MOUSE	>sp|P31786|ACBP_MOUSE Acyl-CoA-binding protein OS=Mus musculus OX=10090 GN=Dbi PE=1 SV=2;>tr|M0QWU8|M0QWU8_MOUSE Acyl-CoA-binding protein OS=Mus musculus OX=10090 GN=Dbi PE=1 SV=1;>tr|Q4VWZ5|Q4VWZ5_MOUSE Acyl-CoA-binding protein OS=Mus musculus OX=10090 GN	8	70.1	10	266.45	16	18	17	21	20	20	394960000	289770000	254830000	456270000	472010000	457900000
sp|P31938|MP2K1_MOUSE	sp|P31938|MP2K1_MOUSE;tr|Q91YS7|Q91YS7_MOUSE;sp|Q63932|MP2K2_MOUSE	>sp|P31938|MP2K1_MOUSE Dual specificity mitogen-activated protein kinase kinase 1 OS=Mus musculus OX=10090 GN=Map2k1 PE=1 SV=2;>tr|Q91YS7|Q91YS7_MOUSE Dual-specificity mitogen-activated protein kinase kinase 2 OS=Mus musculus OX=10090 GN=Map2k2 PE=1 SV=1;>	4	10.9	43.474	11.858	3	2	2	3	3	2	2602400	3506100	3468200	3446600	3129600	3196000
sp|P32020|NLTP_MOUSE	sp|P32020|NLTP_MOUSE	>sp|P32020|NLTP_MOUSE Non-specific lipid-transfer protein OS=Mus musculus OX=10090 GN=Scp2 PE=1 SV=3	8	11	59.125	31.878	6	7	7	6	7	6	12205000	12487000	10477000	8753700	12275000	11684000
sp|P32883|RASK_MOUSE	sp|P32883|RASK_MOUSE;tr|A0A0G2JE25|A0A0G2JE25_MOUSE;tr|A0A0G2JGP4|A0A0G2JGP4_MOUSE;tr|Q9D091|Q9D091_MOUSE;sp|P08556|RASN_MOUSE	>sp|P32883|RASK_MOUSE GTPase KRas OS=Mus musculus OX=10090 GN=Kras PE=1 SV=1;>tr|A0A0G2JE25|A0A0G2JE25_MOUSE GTPase NRas (Fragment) OS=Mus musculus OX=10090 GN=Nras PE=1 SV=1;>tr|A0A0G2JGP4|A0A0G2JGP4_MOUSE GTPase NRas (Fragment) OS=Mus musculus OX=10090 G	2	14.8	21.656	3.5877	2	0	0	0	0	0	1607100	1071400	928310	570660	558040	713200
sp|P32921|SYWC_MOUSE	sp|P32921|SYWC_MOUSE	>sp|P32921|SYWC_MOUSE Tryptophan--tRNA ligase, cytoplasmic OS=Mus musculus OX=10090 GN=Wars PE=1 SV=2	9	22.5	54.357	31.793	13	15	12	9	13	13	3890300	6391200	5752400	6586300	4980900	6201200
sp|P34022|RANG_MOUSE	sp|P34022|RANG_MOUSE;tr|H7BX22|H7BX22_MOUSE	>sp|P34022|RANG_MOUSE Ran-specific GTPase-activating protein OS=Mus musculus OX=10090 GN=Ranbp1 PE=1 SV=2;>tr|H7BX22|H7BX22_MOUSE Ran-specific GTPase-activating protein OS=Mus musculus OX=10090 GN=Ranbp1 PE=1 SV=1	7	44.3	23.596	55.471	14	12	15	16	17	17	34968000	53342000	59809000	83263000	54363000	63021000
sp|P34884|MIF_MOUSE	sp|P34884|MIF_MOUSE	>sp|P34884|MIF_MOUSE Macrophage migration inhibitory factor OS=Mus musculus OX=10090 GN=Mif PE=1 SV=2	4	36.5	12.504	83.896	15	16	14	12	14	13	342430000	215770000	188510000	307080000	189770000	195650000
tr|B0QZX1|B0QZX1_MOUSE	tr|B0QZX1|B0QZX1_MOUSE;sp|P34902|IL2RG_MOUSE;tr|A2AGH5|A2AGH5_MOUSE	>tr|B0QZX1|B0QZX1_MOUSE Cytokine receptor common subunit gamma (Fragment) OS=Mus musculus OX=10090 GN=Il2rg PE=4 SV=1;>sp|P34902|IL2RG_MOUSE Cytokine receptor common subunit gamma OS=Mus musculus OX=10090 GN=Il2rg PE=1 SV=1;>tr|A2AGH5|A2AGH5_MOUSE Predicte	2	14.4	18.275	4.9023	1	0	0	0	0	2	202100	0	362770	403830	420740	530200
tr|A0A0A6YW28|A0A0A6YW28_MOUSE	tr|A0A0A6YW28|A0A0A6YW28_MOUSE;sp|P35123|UBP4_MOUSE;tr|A0A0A6YVY7|A0A0A6YVY7_MOUSE	>tr|A0A0A6YW28|A0A0A6YW28_MOUSE Ubiquitin carboxyl-terminal hydrolase 4 OS=Mus musculus OX=10090 GN=Usp4 PE=1 SV=1;>sp|P35123|UBP4_MOUSE Ubiquitin carboxyl-terminal hydrolase 4 OS=Mus musculus OX=10090 GN=Usp4 PE=1 SV=3;>tr|A0A0A6YVY7|A0A0A6YVY7_MOUSE Ubiq	4	6.1	103.72	14.568	5	5	2	5	3	2	620290	1053800	326550	1183300	720370	635940
sp|P35235|PTN11_MOUSE	sp|P35235|PTN11_MOUSE	>sp|P35235|PTN11_MOUSE Tyrosine-protein phosphatase non-receptor type 11 OS=Mus musculus OX=10090 GN=Ptpn11 PE=1 SV=2	4	7.7	68.46	8.2224	3	1	4	4	2	4	1098700	902320	1203400	1339200	1302700	1707500
sp|P35278|RAB5C_MOUSE	sp|P35278|RAB5C_MOUSE;tr|Q8C266|Q8C266_MOUSE	>sp|P35278|RAB5C_MOUSE Ras-related protein Rab-5C OS=Mus musculus OX=10090 GN=Rab5c PE=1 SV=2;>tr|Q8C266|Q8C266_MOUSE Ras-related protein Rab-5C OS=Mus musculus OX=10090 GN=Rab5c PE=1 SV=1	4	42.6	23.412	18.199	5	1	8	4	4	5	3102300	2683400	3462000	8721400	5034300	2711100
sp|P35282|RAB21_MOUSE	sp|P35282|RAB21_MOUSE	>sp|P35282|RAB21_MOUSE Ras-related protein Rab-21 OS=Mus musculus OX=10090 GN=Rab21 PE=1 SV=4	2	10.4	24.106	3.6347	0	1	0	0	0	0	589920	466910	650030	775620	827260	682550
sp|P35293|RAB18_MOUSE	sp|P35293|RAB18_MOUSE;tr|A0A3Q4EI12|A0A3Q4EI12_MOUSE;tr|A0A3Q4EIF7|A0A3Q4EIF7_MOUSE	>sp|P35293|RAB18_MOUSE Ras-related protein Rab-18 OS=Mus musculus OX=10090 GN=Rab18 PE=1 SV=2;>tr|A0A3Q4EI12|A0A3Q4EI12_MOUSE Ras-related protein Rab-18 OS=Mus musculus OX=10090 GN=Rab18 PE=4 SV=1;>tr|A0A3Q4EIF7|A0A3Q4EIF7_MOUSE Ras-related protein Rab-18	2	10.7	23.035	5.4414	3	2	1	1	1	1	548780	227090	497290	1331700	705970	263300
sp|P35486|ODPA_MOUSE	sp|P35486|ODPA_MOUSE	>sp|P35486|ODPA_MOUSE Pyruvate dehydrogenase E1 component subunit alpha, somatic form, mitochondrial OS=Mus musculus OX=10090 GN=Pdha1 PE=1 SV=1	13	31.3	43.231	59.935	7	8	8	14	11	13	7364600	10113000	7484200	19550000	16370000	13745000
tr|D3Z2R9|D3Z2R9_MOUSE	tr|D3Z2R9|D3Z2R9_MOUSE;sp|P35505|FAAA_MOUSE	>tr|D3Z2R9|D3Z2R9_MOUSE Fumarylacetoacetase (Fragment) OS=Mus musculus OX=10090 GN=Fah PE=1 SV=1;>sp|P35505|FAAA_MOUSE Fumarylacetoacetase OS=Mus musculus OX=10090 GN=Fah PE=1 SV=2	1	9.2	15.631	2.6928	1	1	1	1	1	0	786720	183420	0	351800	1824400	989630
sp|P35550|FBRL_MOUSE	sp|P35550|FBRL_MOUSE	>sp|P35550|FBRL_MOUSE rRNA 2-O-methyltransferase fibrillarin OS=Mus musculus OX=10090 GN=Fbl PE=1 SV=2	8	33.9	34.306	33.354	8	16	11	12	12	12	13442000	16988000	14703000	17409000	9048700	14060000
sp|P35564|CALX_MOUSE	sp|P35564|CALX_MOUSE	>sp|P35564|CALX_MOUSE Calnexin OS=Mus musculus OX=10090 GN=Canx PE=1 SV=1	7	14.6	67.277	48.101	6	5	7	6	8	9	4375100	5251300	4865700	7398100	10070000	8939200
sp|P35585|AP1M1_MOUSE	sp|P35585|AP1M1_MOUSE;tr|D3YZ71|D3YZ71_MOUSE	>sp|P35585|AP1M1_MOUSE AP-1 complex subunit mu-1 OS=Mus musculus OX=10090 GN=Ap1m1 PE=1 SV=3;>tr|D3YZ71|D3YZ71_MOUSE AP-1 complex subunit mu-1 (Fragment) OS=Mus musculus OX=10090 GN=Ap1m1 PE=1 SV=1	2	5.9	48.542	4.7781	0	0	0	2	3	1	478890	0	0	874420	560390	852310
sp|P35700|PRDX1_MOUSE	sp|P35700|PRDX1_MOUSE;tr|B1AXW5|B1AXW5_MOUSE;tr|B1AXW6|B1AXW6_MOUSE;tr|B1AXW4|B1AXW4_MOUSE	>sp|P35700|PRDX1_MOUSE Peroxiredoxin-1 OS=Mus musculus OX=10090 GN=Prdx1 PE=1 SV=1;>tr|B1AXW5|B1AXW5_MOUSE Peroxiredoxin-1 (Fragment) OS=Mus musculus OX=10090 GN=Prdx1 PE=1 SV=8;>tr|B1AXW6|B1AXW6_MOUSE Peroxiredoxin-1 (Fragment) OS=Mus musculus OX=10090 GN	18	58.8	22.176	154.42	49	57	45	50	55	55	212400000	267920000	233030000	268860000	236680000	269400000
sp|P35821|PTN1_MOUSE	sp|P35821|PTN1_MOUSE	>sp|P35821|PTN1_MOUSE Tyrosine-protein phosphatase non-receptor type 1 OS=Mus musculus OX=10090 GN=Ptpn1 PE=1 SV=2	6	18.1	49.593	18.799	1	3	5	2	3	0	1786900	2161900	1964800	1639500	2616900	2212600
sp|P35831|PTN12_MOUSE	sp|P35831|PTN12_MOUSE	>sp|P35831|PTN12_MOUSE Tyrosine-protein phosphatase non-receptor type 12 OS=Mus musculus OX=10090 GN=Ptpn12 PE=1 SV=3	1	1.7	86.525	6.9684	2	1	0	0	0	1	253170	121650	57486	168250	186440	192590
sp|P35979|RL12_MOUSE	sp|P35979|RL12_MOUSE	>sp|P35979|RL12_MOUSE 60S ribosomal protein L12 OS=Mus musculus OX=10090 GN=Rpl12 PE=1 SV=2	3	28.5	17.804	14.649	3	5	2	3	4	3	8946800	12686000	14053000	15049000	12767000	13611000
tr|A0A1B0GSF7|A0A1B0GSF7_MOUSE	tr|A0A1B0GSF7|A0A1B0GSF7_MOUSE;tr|A0A1B0GSS8|A0A1B0GSS8_MOUSE;tr|A0A1B0GQU8|A0A1B0GQU8_MOUSE;sp|P35980|RL18_MOUSE;tr|A0A1B0GRZ3|A0A1B0GRZ3_MOUSE;tr|A0A1B0GSA8|A0A1B0GSA8_MOUSE	>tr|A0A1B0GSF7|A0A1B0GSF7_MOUSE 60S ribosomal protein L18 OS=Mus musculus OX=10090 GN=Rpl18 PE=1 SV=1;>tr|A0A1B0GSS8|A0A1B0GSS8_MOUSE 60S ribosomal protein L18 OS=Mus musculus OX=10090 GN=Rpl18 PE=1 SV=1;>tr|A0A1B0GQU8|A0A1B0GQU8_MOUSE 60S ribosomal protei	2	16.9	15.245	7.1057	1	2	2	0	0	0	3397200	4218200	4343400	1076800	0	0
tr|A0A1W2P720|A0A1W2P720_MOUSE	tr|A0A1W2P720|A0A1W2P720_MOUSE;tr|A0A1W2P869|A0A1W2P869_MOUSE;tr|A0A1W2P6N3|A0A1W2P6N3_MOUSE;tr|Q99JZ4|Q99JZ4_MOUSE;sp|Q9CQC9|SAR1B_MOUSE;sp|P36536|SAR1A_MOUSE	>tr|A0A1W2P720|A0A1W2P720_MOUSE GTP-binding protein SAR1a (Fragment) OS=Mus musculus OX=10090 GN=Sar1a PE=1 SV=1;>tr|A0A1W2P869|A0A1W2P869_MOUSE GTP-binding protein SAR1a (Fragment) OS=Mus musculus OX=10090 GN=Sar1a PE=1 SV=1;>tr|A0A1W2P6N3|A0A1W2P6N3_MOUS	1	13.6	9.0914	3.2273	2	1	1	0	3	1	982450	2108600	938310	1473300	958460	1260200
sp|P36552|HEM6_MOUSE	sp|P36552|HEM6_MOUSE	>sp|P36552|HEM6_MOUSE Oxygen-dependent coproporphyrinogen-III oxidase, mitochondrial OS=Mus musculus OX=10090 GN=Cpox PE=1 SV=2	4	12.2	49.714	12.939	2	4	2	2	3	3	1030000	1149700	557440	391220	958180	1463400
tr|D6RET5|D6RET5_MOUSE	tr|D6RET5|D6RET5_MOUSE;sp|P36898|BMR1B_MOUSE	>tr|D6RET5|D6RET5_MOUSE Bone morphogenetic protein receptor type-1B OS=Mus musculus OX=10090 GN=Bmpr1b PE=4 SV=1;>sp|P36898|BMR1B_MOUSE Bone morphogenetic protein receptor type-1B OS=Mus musculus OX=10090 GN=Bmpr1b PE=1 SV=1	1	20.7	6.7057	3.4964	1	1	0	0	1	0	12631000	20848000	17738000	0	19052000	0
sp|P36993|PPM1B_MOUSE	sp|P36993|PPM1B_MOUSE;tr|Q99NF7|Q99NF7_MOUSE	>sp|P36993|PPM1B_MOUSE Protein phosphatase 1B OS=Mus musculus OX=10090 GN=Ppm1b PE=1 SV=1;>tr|Q99NF7|Q99NF7_MOUSE Ppm1b protein OS=Mus musculus OX=10090 GN=Ppm1b PE=1 SV=1	3	14.9	42.795	11.929	6	3	6	6	3	4	5221600	2594400	2915900	5067000	3025100	4871900
tr|Q05DV1|Q05DV1_MOUSE	tr|Q05DV1|Q05DV1_MOUSE;sp|P37040|NCPR_MOUSE	>tr|Q05DV1|Q05DV1_MOUSE NADPH--cytochrome P450 reductase OS=Mus musculus OX=10090 GN=Por PE=1 SV=1;>sp|P37040|NCPR_MOUSE NADPH--cytochrome P450 reductase OS=Mus musculus OX=10090 GN=Por PE=1 SV=2	3	5.9	72.93	7.0889	2	1	0	3	1	1	233190	294000	177490	324800	302510	0
sp|P37913|DNLI1_MOUSE	sp|P37913|DNLI1_MOUSE;tr|Q3U4X8|Q3U4X8_MOUSE;tr|V9GWZ4|V9GWZ4_MOUSE	>sp|P37913|DNLI1_MOUSE DNA ligase 1 OS=Mus musculus OX=10090 GN=Lig1 PE=1 SV=2;>tr|Q3U4X8|Q3U4X8_MOUSE DNA ligase OS=Mus musculus OX=10090 GN=Lig1 PE=1 SV=1;>tr|V9GWZ4|V9GWZ4_MOUSE DNA ligase 1 (Fragment) OS=Mus musculus OX=10090 GN=Lig1 PE=1 SV=1	2	2.2	102.29	3.1941	1	0	0	1	0	0	51989	66716	48721	50361	51399	61778
sp|P38060|HMGCL_MOUSE	sp|P38060|HMGCL_MOUSE	>sp|P38060|HMGCL_MOUSE Hydroxymethylglutaryl-CoA lyase, mitochondrial OS=Mus musculus OX=10090 GN=Hmgcl PE=1 SV=2	4	17.8	34.238	11.118	1	2	1	2	1	0	958530	1605500	1020000	1731200	2017000	1466900
sp|P38647|GRP75_MOUSE	sp|P38647|GRP75_MOUSE	>sp|P38647|GRP75_MOUSE Stress-70 protein, mitochondrial OS=Mus musculus OX=10090 GN=Hspa9 PE=1 SV=3	25	40.6	73.46	323.31	55	49	59	59	60	63	49301000	52684000	46798000	69252000	63441000	57210000
tr|G3X9G4|G3X9G4_MOUSE	tr|G3X9G4|G3X9G4_MOUSE;sp|P39054|DYN2_MOUSE;tr|F8WIV5|F8WIV5_MOUSE	>tr|G3X9G4|G3X9G4_MOUSE Dynamin-2 OS=Mus musculus OX=10090 GN=Dnm2 PE=1 SV=1;>sp|P39054|DYN2_MOUSE Dynamin-2 OS=Mus musculus OX=10090 GN=Dnm2 PE=1 SV=2;>tr|F8WIV5|F8WIV5_MOUSE Dynamin-2 OS=Mus musculus OX=10090 GN=Dnm2 PE=1 SV=2	1	22.2	98.073	5.0909	2	1	0	1	1	0	0	0	0	0	0	0
sp|P40124|CAP1_MOUSE	sp|P40124|CAP1_MOUSE	>sp|P40124|CAP1_MOUSE Adenylyl cyclase-associated protein 1 OS=Mus musculus OX=10090 GN=Cap1 PE=1 SV=4	21	54.6	51.564	298.21	41	45	47	50	48	59	101770000	126120000	129300000	156920000	164320000	174240000
sp|P40142|TKT_MOUSE	sp|P40142|TKT_MOUSE;tr|A0A286YE28|A0A286YE28_MOUSE	>sp|P40142|TKT_MOUSE Transketolase OS=Mus musculus OX=10090 GN=Tkt PE=1 SV=1;>tr|A0A286YE28|A0A286YE28_MOUSE Transketolase (Fragment) OS=Mus musculus OX=10090 GN=Tkt PE=1 SV=1	22	45.3	67.63	323.31	71	74	79	86	80	91	180370000	296050000	221600000	283360000	245180000	315920000
sp|P40237|CD82_MOUSE	sp|P40237|CD82_MOUSE;tr|A2AIJ2|A2AIJ2_MOUSE;tr|A2AIJ1|A2AIJ1_MOUSE	>sp|P40237|CD82_MOUSE CD82 antigen OS=Mus musculus OX=10090 GN=Cd82 PE=1 SV=1;>tr|A2AIJ2|A2AIJ2_MOUSE CD82 antigen (Fragment) OS=Mus musculus OX=10090 GN=Cd82 PE=1 SV=1;>tr|A2AIJ1|A2AIJ1_MOUSE Tetraspanin (Fragment) OS=Mus musculus OX=10090 GN=Cd82 PE=1 SV	2	8.3	29.628	3.2971	0	0	0	1	1	0	0	0	0	1286800	1763200	190170
sp|P40336|VP26A_MOUSE	sp|P40336|VP26A_MOUSE	>sp|P40336|VP26A_MOUSE Vacuolar protein sorting-associated protein 26A OS=Mus musculus OX=10090 GN=Vps26a PE=1 SV=1	1	5.2	38.113	4.1711	3	3	1	3	3	1	188660	253830	0	353850	299830	231650
tr|A0A0R4J1N9|A0A0R4J1N9_MOUSE	tr|A0A0R4J1N9|A0A0R4J1N9_MOUSE;sp|P40630|TFAM_MOUSE;tr|D3Z0F3|D3Z0F3_MOUSE	>tr|A0A0R4J1N9|A0A0R4J1N9_MOUSE Transcription factor A, mitochondrial OS=Mus musculus OX=10090 GN=Tfam PE=1 SV=1;>sp|P40630|TFAM_MOUSE Transcription factor A, mitochondrial OS=Mus musculus OX=10090 GN=Tfam PE=1 SV=2;>tr|D3Z0F3|D3Z0F3_MOUSE Transcription fa	5	25.1	23.384	18.659	3	7	6	3	6	5	5569600	11881000	7605900	9971900	8786500	10969000
sp|P41105|RL28_MOUSE	sp|P41105|RL28_MOUSE	>sp|P41105|RL28_MOUSE 60S ribosomal protein L28 OS=Mus musculus OX=10090 GN=Rpl28 PE=1 SV=2	1	7.3	15.733	3.8434	2	3	0	1	2	1	921670	1573400	0	760720	921800	613060
sp|P41241|CSK_MOUSE	sp|P41241|CSK_MOUSE	>sp|P41241|CSK_MOUSE Tyrosine-protein kinase CSK OS=Mus musculus OX=10090 GN=Csk PE=1 SV=2	13	32.4	50.716	102.23	19	15	15	18	18	19	8376900	9634500	8255600	20437000	12167000	12364000
sp|P42125|ECI1_MOUSE	sp|P42125|ECI1_MOUSE;tr|A0A3Q4EC00|A0A3Q4EC00_MOUSE	>sp|P42125|ECI1_MOUSE Enoyl-CoA delta isomerase 1, mitochondrial OS=Mus musculus OX=10090 GN=Eci1 PE=1 SV=2;>tr|A0A3Q4EC00|A0A3Q4EC00_MOUSE Enoyl-CoA delta isomerase 1, mitochondrial OS=Mus musculus OX=10090 GN=Eci1 PE=4 SV=1	7	29.8	32.25	30.298	7	8	7	9	8	11	12003000	13628000	12714000	23787000	15870000	23405000
sp|P42128|FOXK1_MOUSE	sp|P42128|FOXK1_MOUSE	>sp|P42128|FOXK1_MOUSE Forkhead box protein K1 OS=Mus musculus OX=10090 GN=Foxk1 PE=1 SV=2	5	10.2	74.919	10.731	1	2	1	2	2	3	644110	939640	642680	421170	1063400	1051500
sp|P42208|SEPT2_MOUSE	sp|P42208|SEPT2_MOUSE;tr|E9Q3V6|E9Q3V6_MOUSE;tr|F6WYM0|F6WYM0_MOUSE;tr|D3YYB1|D3YYB1_MOUSE;tr|D3Z3C0|D3Z3C0_MOUSE	>sp|P42208|SEPT2_MOUSE Septin-2 OS=Mus musculus OX=10090 GN=Sept2 PE=1 SV=2;>tr|E9Q3V6|E9Q3V6_MOUSE Septin-2 OS=Mus musculus OX=10090 GN=Sept2 PE=1 SV=1;>tr|F6WYM0|F6WYM0_MOUSE Septin-2 (Fragment) OS=Mus musculus OX=10090 GN=Sept2 PE=1 SV=2;>tr|D3YYB1|D3YY	7	31.6	41.525	22.306	4	8	8	8	9	9	4808600	6505400	6892600	6766200	6436100	8377400
sp|P42209|SEPT1_MOUSE	sp|P42209|SEPT1_MOUSE;tr|A0A0U1RQA1|A0A0U1RQA1_MOUSE;tr|D3Z3V3|D3Z3V3_MOUSE;tr|A0A0U1RPA8|A0A0U1RPA8_MOUSE;tr|D3YVG1|D3YVG1_MOUSE	>sp|P42209|SEPT1_MOUSE Septin-1 OS=Mus musculus OX=10090 GN=Sept1 PE=1 SV=2;>tr|A0A0U1RQA1|A0A0U1RQA1_MOUSE Septin-1 (Fragment) OS=Mus musculus OX=10090 GN=Sept1 PE=1 SV=2;>tr|D3Z3V3|D3Z3V3_MOUSE Septin-1 OS=Mus musculus OX=10090 GN=Sept1 PE=1 SV=1;>tr|A0A	14	42.1	42.019	147.2	24	26	24	29	29	23	37725000	51257000	36810000	54293000	42129000	49808000
tr|Q8C3V4|Q8C3V4_MOUSE	tr|Q8C3V4|Q8C3V4_MOUSE;sp|P42225|STAT1_MOUSE;tr|A0A087WSP5|A0A087WSP5_MOUSE;tr|Q99K94|Q99K94_MOUSE	>tr|Q8C3V4|Q8C3V4_MOUSE Signal transducer and activator of transcription OS=Mus musculus OX=10090 GN=Stat1 PE=1 SV=1;>sp|P42225|STAT1_MOUSE Signal transducer and activator of transcription 1 OS=Mus musculus OX=10090 GN=Stat1 PE=1 SV=1;>tr|A0A087WSP5|A0A087	26	39	87.314	147.46	41	42	43	38	47	43	24733000	27749000	31969000	41038000	31257000	45047000
sp|P42227|STAT3_MOUSE	sp|P42227|STAT3_MOUSE;tr|B7ZC18|B7ZC18_MOUSE	>sp|P42227|STAT3_MOUSE Signal transducer and activator of transcription 3 OS=Mus musculus OX=10090 GN=Stat3 PE=1 SV=2;>tr|B7ZC18|B7ZC18_MOUSE Signal transducer and activator of transcription OS=Mus musculus OX=10090 GN=Stat3 PE=1 SV=1	8	14.7	88.053	25.096	1	4	8	5	6	4	575550	1079600	1524500	1088600	1353700	1685700
tr|Q3V157|Q3V157_MOUSE	tr|Q3V157|Q3V157_MOUSE;sp|P42228|STAT4_MOUSE	>tr|Q3V157|Q3V157_MOUSE Signal transducer and activator of transcription OS=Mus musculus OX=10090 GN=Stat4 PE=1 SV=1;>sp|P42228|STAT4_MOUSE Signal transducer and activator of transcription 4 OS=Mus musculus OX=10090 GN=Stat4 PE=1 SV=1	1	1.6	85.853	2.6687	0	0	1	1	2	0	55005	70398	77059	79771	150080	87573
sp|P42230|STA5A_MOUSE	sp|P42230|STA5A_MOUSE;tr|B2C3G8|B2C3G8_MOUSE	>sp|P42230|STA5A_MOUSE Signal transducer and activator of transcription 5A OS=Mus musculus OX=10090 GN=Stat5a PE=1 SV=1;>tr|B2C3G8|B2C3G8_MOUSE Signal transducer and activator of transcription OS=Mus musculus OX=10090 GN=Stat5a PE=1 SV=1	5	20.3	90.83	98.509	15	13	12	16	24	19	4826200	7059800	5144800	7482500	6409800	8424000
sp|P42232|STA5B_MOUSE	sp|P42232|STA5B_MOUSE	>sp|P42232|STA5B_MOUSE Signal transducer and activator of transcription 5B OS=Mus musculus OX=10090 GN=Stat5b PE=1 SV=1	4	20.2	90.001	12.587	2	2	2	4	1	4	1138300	1248000	1429900	2072300	1962200	2315300
tr|Q5JC28|Q5JC28_MOUSE	tr|Q5JC28|Q5JC28_MOUSE;sp|P42567|EPS15_MOUSE;tr|H3BK65|H3BK65_MOUSE;tr|F6W2Q5|F6W2Q5_MOUSE	>tr|Q5JC28|Q5JC28_MOUSE Epidermal growth factor receptor pathway substrate 15 isoform B OS=Mus musculus OX=10090 GN=Eps15 PE=1 SV=1;>sp|P42567|EPS15_MOUSE Epidermal growth factor receptor substrate 15 OS=Mus musculus OX=10090 GN=Eps15 PE=1 SV=1;>tr|H3BK65|	14	26.1	86.677	51.204	4	4	5	11	10	11	2151400	2064600	3013700	2805800	3158700	2652400
sp|P42669|PURA_MOUSE	sp|P42669|PURA_MOUSE	>sp|P42669|PURA_MOUSE Transcriptional activator protein Pur-alpha OS=Mus musculus OX=10090 GN=Pura PE=1 SV=1	3	18.1	34.883	55.579	4	3	9	7	5	7	7232400	12230000	8239000	12048000	7861700	8910200
sp|P42932|TCPQ_MOUSE	sp|P42932|TCPQ_MOUSE;tr|H3BL49|H3BL49_MOUSE;tr|H3BJB6|H3BJB6_MOUSE	>sp|P42932|TCPQ_MOUSE T-complex protein 1 subunit theta OS=Mus musculus OX=10090 GN=Cct8 PE=1 SV=3;>tr|H3BL49|H3BL49_MOUSE T-complex protein 1 subunit theta OS=Mus musculus OX=10090 GN=Cct8 PE=1 SV=1;>tr|H3BJB6|H3BJB6_MOUSE T-complex protein 1 subunit thet	24	42.2	59.555	162.33	29	27	24	32	34	30	33076000	40243000	34298000	43097000	37811000	43431000
sp|P43024|CX6A1_MOUSE	sp|P43024|CX6A1_MOUSE;tr|Q9DCW5|Q9DCW5_MOUSE	>sp|P43024|CX6A1_MOUSE Cytochrome c oxidase subunit 6A1, mitochondrial OS=Mus musculus OX=10090 GN=Cox6a1 PE=1 SV=2;>tr|Q9DCW5|Q9DCW5_MOUSE Cytochrome c oxidase subunit 6A, mitochondrial OS=Mus musculus OX=10090 GN=Cox6a1 PE=1 SV=1	1	14.4	12.352	4.5165	1	1	2	2	1	2	12494000	11441000	8260600	7647900	16181000	10829000
sp|P43247|MSH2_MOUSE	sp|P43247|MSH2_MOUSE	>sp|P43247|MSH2_MOUSE DNA mismatch repair protein Msh2 OS=Mus musculus OX=10090 GN=Msh2 PE=1 SV=1	11	14.2	104.15	35.604	8	10	9	11	15	16	1620600	2254400	3029700	3772800	2424700	3011500
sp|P43274|H14_MOUSE	sp|P43274|H14_MOUSE	>sp|P43274|H14_MOUSE Histone H1.4 OS=Mus musculus OX=10090 GN=Hist1h1e PE=1 SV=2	5	32.4	21.977	180.94	21	22	24	17	14	15	599630000	710600000	707320000	199560000	276590000	258940000
sp|P43275|H11_MOUSE	sp|P43275|H11_MOUSE	>sp|P43275|H11_MOUSE Histone H1.1 OS=Mus musculus OX=10090 GN=Hist1h1a PE=1 SV=2	7	37.1	21.785	112.67	13	16	16	8	6	9	54350000	78970000	101290000	22327000	22359000	22832000
sp|P43276|H15_MOUSE	sp|P43276|H15_MOUSE	>sp|P43276|H15_MOUSE Histone H1.5 OS=Mus musculus OX=10090 GN=Hist1h1b PE=1 SV=2	8	29.6	22.576	81.5	13	15	17	8	9	12	161910000	216250000	237910000	66285000	66910000	70263000
sp|P17710|HXK1_MOUSE	sp|P17710|HXK1_MOUSE	>sp|P17710|HXK1_MOUSE Hexokinase-1, EC 2.7.1.1 (Hexokinase type I, HK I) (Hexokinase, tumor isozyme)	1	30.3	22.099	28.722	11	13	11	9	7	9	3866300000	4516790000	5145680000	89646500	108918000	139655000
sp|P43346|DCK_MOUSE	sp|P43346|DCK_MOUSE	>sp|P43346|DCK_MOUSE Deoxycytidine kinase OS=Mus musculus OX=10090 GN=Dck PE=1 SV=1	2	8.8	30.367	4.3086	1	1	0	2	0	1	1890700	715540	0	1176100	1113800	1092400
sp|P43404|ZAP70_MOUSE	sp|P43404|ZAP70_MOUSE	>sp|P43404|ZAP70_MOUSE Tyrosine-protein kinase ZAP-70 OS=Mus musculus OX=10090 GN=Zap70 PE=1 SV=3	9	14.1	70.111	56.447	11	7	9	14	10	13	2849300	3320100	3079200	4985600	3762000	4659300
sp|P45376|ALDR_MOUSE	sp|P45376|ALDR_MOUSE;tr|D3YVJ7|D3YVJ7_MOUSE	>sp|P45376|ALDR_MOUSE Aldo-keto reductase family 1 member B1 OS=Mus musculus OX=10090 GN=Akr1b1 PE=1 SV=3;>tr|D3YVJ7|D3YVJ7_MOUSE Aldo-keto reductase family 1, member B3 (aldose reductase) (Fragment) OS=Mus musculus OX=10090 GN=Akr1b3 PE=1 SV=1	15	45.9	35.732	90.761	21	23	26	27	24	26	109270000	88285000	95236000	162220000	98508000	112640000
sp|P45878|FKBP2_MOUSE	sp|P45878|FKBP2_MOUSE	>sp|P45878|FKBP2_MOUSE Peptidyl-prolyl cis-trans isomerase FKBP2 OS=Mus musculus OX=10090 GN=Fkbp2 PE=1 SV=1	3	19.3	15.344	9.4542	6	2	2	5	1	5	957830	9145500	213840	9775400	3979600	3685700
sp|P45952|ACADM_MOUSE	sp|P45952|ACADM_MOUSE	>sp|P45952|ACADM_MOUSE Medium-chain specific acyl-CoA dehydrogenase, mitochondrial OS=Mus musculus OX=10090 GN=Acadm PE=1 SV=1	6	16.6	46.481	19.964	7	5	4	5	7	3	5183500	5568300	3344300	6911900	6820100	2786600
sp|P46061|RAGP1_MOUSE	sp|P46061|RAGP1_MOUSE	>sp|P46061|RAGP1_MOUSE Ran GTPase-activating protein 1 OS=Mus musculus OX=10090 GN=Rangap1 PE=1 SV=2	14	29.7	63.53	43.095	5	9	11	13	8	10	6435200	8893000	7399100	8612000	6799300	8924800
sp|P46062|SIPA1_MOUSE	sp|P46062|SIPA1_MOUSE;tr|E9Q0Y4|E9Q0Y4_MOUSE	>sp|P46062|SIPA1_MOUSE Signal-induced proliferation-associated protein 1 OS=Mus musculus OX=10090 GN=Sipa1 PE=1 SV=2;>tr|E9Q0Y4|E9Q0Y4_MOUSE Signal-induced proliferation-associated protein 1 OS=Mus musculus OX=10090 GN=Sipa1 PE=1 SV=1	5	7.3	112.06	14.822	0	3	1	1	3	3	262290	332770	572420	497530	472040	533840
sp|P46414|CDN1B_MOUSE	sp|P46414|CDN1B_MOUSE	>sp|P46414|CDN1B_MOUSE Cyclin-dependent kinase inhibitor 1B OS=Mus musculus OX=10090 GN=Cdkn1b PE=1 SV=2	7	48.7	22.193	83.731	6	7	8	6	4	10	22665000	24042000	19174000	29514000	34058000	34479000
sp|P46460|NSF_MOUSE	sp|P46460|NSF_MOUSE	>sp|P46460|NSF_MOUSE Vesicle-fusing ATPase OS=Mus musculus OX=10090 GN=Nsf PE=1 SV=2	9	14.2	82.613	28.27	7	6	3	7	8	5	1666000	1699800	954090	1880900	1841300	2000800
sp|P46467|VPS4B_MOUSE	sp|P46467|VPS4B_MOUSE	>sp|P46467|VPS4B_MOUSE Vacuolar protein sorting-associated protein 4B OS=Mus musculus OX=10090 GN=Vps4b PE=1 SV=2	6	21.6	49.419	33.196	8	9	4	7	10	6	2423600	5076600	1690900	4510000	3527100	3097300
sp|P46471|PRS7_MOUSE	sp|P46471|PRS7_MOUSE;tr|Q8BVQ9|Q8BVQ9_MOUSE	>sp|P46471|PRS7_MOUSE 26S proteasome regulatory subunit 7 OS=Mus musculus OX=10090 GN=Psmc2 PE=1 SV=5;>tr|Q8BVQ9|Q8BVQ9_MOUSE 26S proteasome regulatory subunit 7 OS=Mus musculus OX=10090 GN=Psmc2 PE=1 SV=1	19	57.5	48.647	108.68	12	19	14	15	16	18	12998000	16136000	12423000	17894000	15255000	17438000
sp|P46638|RB11B_MOUSE	sp|P46638|RB11B_MOUSE;tr|G3UY29|G3UY29_MOUSE;tr|E9Q3P9|E9Q3P9_MOUSE;tr|F8WGS1|F8WGS1_MOUSE;tr|G3UZD3|G3UZD3_MOUSE;sp|P62492|RB11A_MOUSE	>sp|P46638|RB11B_MOUSE Ras-related protein Rab-11B OS=Mus musculus OX=10090 GN=Rab11b PE=1 SV=3;>tr|G3UY29|G3UY29_MOUSE MCG22989, isoform CRA_a OS=Mus musculus OX=10090 GN=Rab11b PE=4 SV=1;>tr|E9Q3P9|E9Q3P9_MOUSE Ras-related protein Rab-11A OS=Mus musculus	11	53.7	24.489	40.221	9	14	14	10	11	13	21922000	21472000	21389000	26325000	23712000	27210000
sp|P46664|PURA2_MOUSE	sp|P46664|PURA2_MOUSE	>sp|P46664|PURA2_MOUSE Adenylosuccinate synthetase isozyme 2 OS=Mus musculus OX=10090 GN=Adss PE=1 SV=2	5	17.1	50.02	20.121	2	1	6	4	4	3	1764700	2834000	3156000	3076500	2858100	3587200
tr|A0A0R4J0N5|A0A0R4J0N5_MOUSE	tr|A0A0R4J0N5|A0A0R4J0N5_MOUSE;sp|P46718|PDCD2_MOUSE;tr|A2T4N6|A2T4N6_MOUSE	>tr|A0A0R4J0N5|A0A0R4J0N5_MOUSE Programmed cell death 2, isoform CRA_b OS=Mus musculus OX=10090 GN=Pdcd2 PE=1 SV=1;>sp|P46718|PDCD2_MOUSE Programmed cell death protein 2 OS=Mus musculus OX=10090 GN=Pdcd2 PE=2 SV=2;>tr|A2T4N6|A2T4N6_MOUSE Programmed cell de	2	8.7	38.325	8.4216	0	1	1	3	0	1	959250	446120	481430	1111400	334470	678890
sp|P47738|ALDH2_MOUSE	sp|P47738|ALDH2_MOUSE;tr|A0A0G2JEU1|A0A0G2JEU1_MOUSE;tr|A0A0G2JFQ0|A0A0G2JFQ0_MOUSE	>sp|P47738|ALDH2_MOUSE Aldehyde dehydrogenase, mitochondrial OS=Mus musculus OX=10090 GN=Aldh2 PE=1 SV=1;>tr|A0A0G2JEU1|A0A0G2JEU1_MOUSE Aldehyde dehydrogenase, mitochondrial OS=Mus musculus OX=10090 GN=Aldh2 PE=1 SV=1;>tr|A0A0G2JFQ0|A0A0G2JFQ0_MOUSE Aldeh	13	34.9	56.537	56.429	11	12	13	16	15	16	10701000	13562000	10148000	17664000	11166000	13844000
sp|P47754|CAZA2_MOUSE	sp|P47754|CAZA2_MOUSE;tr|D6RCW7|D6RCW7_MOUSE;tr|A0A0N4SVM0|A0A0N4SVM0_MOUSE	>sp|P47754|CAZA2_MOUSE F-actin-capping protein subunit alpha-2 OS=Mus musculus OX=10090 GN=Capza2 PE=1 SV=3;>tr|D6RCW7|D6RCW7_MOUSE F-actin-capping protein subunit alpha OS=Mus musculus OX=10090 GN=Capza2 PE=1 SV=1;>tr|A0A0N4SVM0|A0A0N4SVM0_MOUSE F-actin-c	9	60.5	32.967	169.1	11	16	15	21	10	19	19450000	35623000	22946000	40167000	19289000	39883000
sp|P47757|CAPZB_MOUSE	sp|P47757|CAPZB_MOUSE;tr|F7CAZ6|F7CAZ6_MOUSE;tr|A0A0A0MQI9|A0A0A0MQI9_MOUSE;tr|F6YHZ8|F6YHZ8_MOUSE	>sp|P47757|CAPZB_MOUSE F-actin-capping protein subunit beta OS=Mus musculus OX=10090 GN=Capzb PE=1 SV=3;>tr|F7CAZ6|F7CAZ6_MOUSE F-actin-capping protein subunit beta (Fragment) OS=Mus musculus OX=10090 GN=Capzb PE=1 SV=1;>tr|A0A0A0MQI9|A0A0A0MQI9_MOUSE F-ac	1	47.7	31.345	18.724	2	3	2	1	2	3	2575900	7441100	2615900	5074300	3276400	3520600
sp|P47791|GSHR_MOUSE	sp|P47791|GSHR_MOUSE	>sp|P47791|GSHR_MOUSE Glutathione reductase, mitochondrial OS=Mus musculus OX=10090 GN=Gsr PE=1 SV=3	12	31.2	53.662	106.26	10	14	13	15	12	13	21017000	19267000	13164000	29617000	23353000	20591000
sp|P47809|MP2K4_MOUSE	sp|P47809|MP2K4_MOUSE;tr|M0QWR0|M0QWR0_MOUSE;tr|B1ATL6|B1ATL6_MOUSE	>sp|P47809|MP2K4_MOUSE Dual specificity mitogen-activated protein kinase kinase 4 OS=Mus musculus OX=10090 GN=Map2k4 PE=1 SV=2;>tr|M0QWR0|M0QWR0_MOUSE Dual-specificity mitogen-activated protein kinase kinase 4 OS=Mus musculus OX=10090 GN=Map2k4 PE=1 SV=1;>	2	14.1	44.113	7.1606	1	0	1	1	1	1	1213100	1387000	1711700	1745000	1068100	1345100
sp|P47811|MK14_MOUSE	sp|P47811|MK14_MOUSE	>sp|P47811|MK14_MOUSE Mitogen-activated protein kinase 14 OS=Mus musculus OX=10090 GN=Mapk14 PE=1 SV=3	3	7.2	41.287	8.9075	3	3	2	2	3	4	2461900	2906400	1932300	423150	2640600	2936500
sp|P47856|GFPT1_MOUSE	sp|P47856|GFPT1_MOUSE	>sp|P47856|GFPT1_MOUSE Glutamine--fructose-6-phosphate aminotransferase [isomerizing] 1 OS=Mus musculus OX=10090 GN=Gfpt1 PE=1 SV=3	3	7	78.538	13.759	2	4	2	5	6	2	318350	314980	334370	596960	477440	588420
sp|P47911|RL6_MOUSE	sp|P47911|RL6_MOUSE	>sp|P47911|RL6_MOUSE 60S ribosomal protein L6 OS=Mus musculus OX=10090 GN=Rpl6 PE=1 SV=3	3	9.5	33.509	7.0892	1	3	3	2	3	3	3969400	4077800	4397600	2703000	1542800	3386300
sp|P47941|CRKL_MOUSE	sp|P47941|CRKL_MOUSE;tr|A0A338P675|A0A338P675_MOUSE	>sp|P47941|CRKL_MOUSE Crk-like protein OS=Mus musculus OX=10090 GN=Crkl PE=1 SV=2;>tr|A0A338P675|A0A338P675_MOUSE Crk-like protein (Fragment) OS=Mus musculus OX=10090 GN=Crkl PE=1 SV=1	10	36.6	33.83	40.251	7	5	9	11	9	7	9539800	14491000	13291000	14958000	16920000	14211000
sp|P47955|RLA1_MOUSE	sp|P47955|RLA1_MOUSE;tr|E9Q3T0|E9Q3T0_MOUSE	>sp|P47955|RLA1_MOUSE 60S acidic ribosomal protein P1 OS=Mus musculus OX=10090 GN=Rplp1 PE=1 SV=1;>tr|E9Q3T0|E9Q3T0_MOUSE Predicted pseudogene 10073 OS=Mus musculus OX=10090 GN=Gm10073 PE=1 SV=1	2	51.8	11.475	7.9443	1	4	7	6	4	7	10735000	35591000	47516000	95684000	31567000	71980000
sp|P47962|RL5_MOUSE	sp|P47962|RL5_MOUSE	>sp|P47962|RL5_MOUSE 60S ribosomal protein L5 OS=Mus musculus OX=10090 GN=Rpl5 PE=1 SV=3	6	18.5	34.4	19.129	4	7	5	5	3	6	13516000	19150000	16254000	11290000	12951000	12816000
sp|P47963|RL13_MOUSE	sp|P47963|RL13_MOUSE	>sp|P47963|RL13_MOUSE 60S ribosomal protein L13 OS=Mus musculus OX=10090 GN=Rpl13 PE=1 SV=3	4	20.4	24.305	33.705	5	6	5	3	3	3	13420000	12843000	15970000	7691600	5678500	6055000
sp|P47968|RPIA_MOUSE	sp|P47968|RPIA_MOUSE	>sp|P47968|RPIA_MOUSE Ribose-5-phosphate isomerase OS=Mus musculus OX=10090 GN=Rpia PE=1 SV=2	4	21.5	32.45	14.906	3	3	1	3	7	1	1296300	1743400	1640000	1514100	1728400	1733400
sp|P48024|EIF1_MOUSE	sp|P48024|EIF1_MOUSE;tr|A0A1L1SSA3|A0A1L1SSA3_MOUSE;tr|J3QPZ8|J3QPZ8_MOUSE;sp|Q9CXU9|EIF1B_MOUSE;tr|J3QN87|J3QN87_MOUSE	>sp|P48024|EIF1_MOUSE Eukaryotic translation initiation factor 1 OS=Mus musculus OX=10090 GN=Eif1 PE=1 SV=2;>tr|A0A1L1SSA3|A0A1L1SSA3_MOUSE Eukaryotic translation initiation factor 1b (Fragment) OS=Mus musculus OX=10090 GN=Eif1b PE=1 SV=1;>tr|J3QPZ8|J3QPZ8	5	44.2	12.746	42.758	7	8	7	7	10	10	22633000	40763000	35953000	39524000	35530000	45323000
sp|P48036|ANXA5_MOUSE	sp|P48036|ANXA5_MOUSE	>sp|P48036|ANXA5_MOUSE Annexin A5 OS=Mus musculus OX=10090 GN=Anxa5 PE=1 SV=1	17	48.6	35.752	212.9	22	29	30	33	32	37	45090000	51577000	47681000	66879000	58428000	62125000
tr|A2A839|A2A839_MOUSE	tr|A2A839|A2A839_MOUSE;tr|A2A838|A2A838_MOUSE;tr|A2AD32|A2AD32_MOUSE;tr|A2A842|A2A842_MOUSE;sp|P48193|41_MOUSE;tr|A2A841|A2A841_MOUSE;tr|A0A1D5RLV1|A0A1D5RLV1_MOUSE	>tr|A2A839|A2A839_MOUSE Protein 4.1 OS=Mus musculus OX=10090 GN=Epb41 PE=1 SV=1;>tr|A2A838|A2A838_MOUSE Protein 4.1 (Fragment) OS=Mus musculus OX=10090 GN=Epb41 PE=1 SV=1;>tr|A2AD32|A2AD32_MOUSE Protein 4.1 (Fragment) OS=Mus musculus OX=10090 GN=Epb41 PE=1	4	8.3	72.423	7.2142	0	2	1	2	2	0	112760	180640	548190	480380	511570	267750
tr|A0A1B0GRV3|A0A1B0GRV3_MOUSE	tr|A0A1B0GRV3|A0A1B0GRV3_MOUSE;sp|P48377|RFX1_MOUSE	>tr|A0A1B0GRV3|A0A1B0GRV3_MOUSE MHC class II regulatory factor RFX1 OS=Mus musculus OX=10090 GN=Rfx1 PE=1 SV=1;>sp|P48377|RFX1_MOUSE MHC class II regulatory factor RFX1 OS=Mus musculus OX=10090 GN=Rfx1 PE=1 SV=2	3	5.5	98.1	10.709	0	1	2	4	1	1	395660	688130	550960	532530	392450	327100
tr|A0A1Y7VJ48|A0A1Y7VJ48_MOUSE	tr|A0A1Y7VJ48|A0A1Y7VJ48_MOUSE;sp|P48428|TBCA_MOUSE	>tr|A0A1Y7VJ48|A0A1Y7VJ48_MOUSE Tubulin-specific chaperone A OS=Mus musculus OX=10090 GN=Tbca PE=1 SV=1;>sp|P48428|TBCA_MOUSE Tubulin-specific chaperone A OS=Mus musculus OX=10090 GN=Tbca PE=1 SV=3	2	26.2	9.9271	6.0998	2	2	2	2	3	3	14822000	13394000	19972000	19753000	29227000	23217000
tr|E0CZ78|E0CZ78_MOUSE	tr|E0CZ78|E0CZ78_MOUSE;sp|P48453|PP2BB_MOUSE;tr|E9Q6P2|E9Q6P2_MOUSE;tr|G3X8U7|G3X8U7_MOUSE	>tr|E0CZ78|E0CZ78_MOUSE Serine/threonine-protein phosphatase OS=Mus musculus OX=10090 GN=Ppp3cb PE=1 SV=1;>sp|P48453|PP2BB_MOUSE Serine/threonine-protein phosphatase 2B catalytic subunit beta isoform OS=Mus musculus OX=10090 GN=Ppp3cb PE=1 SV=2;>tr|E9Q6P2|	4	13	59.074	15.961	5	3	2	0	3	2	1869900	1522400	1965000	734760	2340000	2961900
sp|P48678|LMNA_MOUSE	sp|P48678|LMNA_MOUSE	>sp|P48678|LMNA_MOUSE Prelamin-A/C OS=Mus musculus OX=10090 GN=Lmna PE=1 SV=2	31	54.9	74.237	269.79	30	30	29	38	40	35	33426000	32712000	29248000	44334000	45411000	44980000
sp|P48722|HS74L_MOUSE	sp|P48722|HS74L_MOUSE;tr|E0CY23|E0CY23_MOUSE	>sp|P48722|HS74L_MOUSE Heat shock 70 kDa protein 4L OS=Mus musculus OX=10090 GN=Hspa4l PE=1 SV=2;>tr|E0CY23|E0CY23_MOUSE Heat shock 70 kDa protein 4L (Fragment) OS=Mus musculus OX=10090 GN=Hspa4l PE=1 SV=1	5	12.3	94.381	14.557	2	2	4	3	4	4	678940	493120	336670	588670	896870	844670
sp|P48758|CBR1_MOUSE	sp|P48758|CBR1_MOUSE;tr|A0A338P684|A0A338P684_MOUSE	>sp|P48758|CBR1_MOUSE Carbonyl reductase [NADPH] 1 OS=Mus musculus OX=10090 GN=Cbr1 PE=1 SV=3;>tr|A0A338P684|A0A338P684_MOUSE Carbonyl reductase [NADPH] 1 OS=Mus musculus OX=10090 GN=Cbr1 PE=1 SV=1	12	55.2	30.641	74.799	12	16	14	15	12	12	30663000	36416000	32327000	41438000	27050000	36110000
sp|P48771|CX7A2_MOUSE	sp|P48771|CX7A2_MOUSE	>sp|P48771|CX7A2_MOUSE Cytochrome c oxidase subunit 7A2, mitochondrial OS=Mus musculus OX=10090 GN=Cox7a2 PE=1 SV=2	2	27.7	9.2908	5.2781	1	2	2	2	1	2	1871600	23498000	4872000	5845800	10703000	4869700
tr|Q3ZAR9|Q3ZAR9_MOUSE	tr|Q3ZAR9|Q3ZAR9_MOUSE;sp|P49117|NR2C2_MOUSE;tr|G3X9W4|G3X9W4_MOUSE	>tr|Q3ZAR9|Q3ZAR9_MOUSE Nr2c2 protein OS=Mus musculus OX=10090 GN=Nr2c2 PE=1 SV=1;>sp|P49117|NR2C2_MOUSE Nuclear receptor subfamily 2 group C member 2 OS=Mus musculus OX=10090 GN=Nr2c2 PE=1 SV=1;>tr|G3X9W4|G3X9W4_MOUSE Nuclear receptor subfamily 2 group C	1	3	54.6	3.1213	0	0	0	1	1	0	282690	387200	232820	273600	206480	476300
sp|P49312|ROA1_MOUSE	sp|P49312|ROA1_MOUSE;tr|Q5EBP8|Q5EBP8_MOUSE	>sp|P49312|ROA1_MOUSE Heterogeneous nuclear ribonucleoprotein A1 OS=Mus musculus OX=10090 GN=Hnrnpa1 PE=1 SV=2;>tr|Q5EBP8|Q5EBP8_MOUSE Heterogeneous nuclear ribonucleoprotein A1 OS=Mus musculus OX=10090 GN=Hnrnpa1 PE=1 SV=1	14	36.6	34.196	222	31	28	28	39	35	38	184010000	196500000	180860000	197540000	191090000	209060000
sp|P49442|INPP_MOUSE	sp|P49442|INPP_MOUSE	>sp|P49442|INPP_MOUSE Inositol polyphosphate 1-phosphatase OS=Mus musculus OX=10090 GN=Inpp1 PE=1 SV=2	5	18.2	43.346	15.497	3	5	2	4	5	6	2290400	4756400	2497700	3869900	3836700	3834200
tr|A0A0G2JDL3|A0A0G2JDL3_MOUSE	tr|A0A0G2JDL3|A0A0G2JDL3_MOUSE;sp|P49615|CDK5_MOUSE	>tr|A0A0G2JDL3|A0A0G2JDL3_MOUSE Cyclin-dependent-like kinase 5 OS=Mus musculus OX=10090 GN=Cdk5 PE=1 SV=1;>sp|P49615|CDK5_MOUSE Cyclin-dependent-like kinase 5 OS=Mus musculus OX=10090 GN=Cdk5 PE=1 SV=1	2	15	29.528	6.1963	2	3	1	3	2	2	1117300	2136800	1639700	2173800	2053300	1997300
sp|P49710|HCLS1_MOUSE	sp|P49710|HCLS1_MOUSE	>sp|P49710|HCLS1_MOUSE Hematopoietic lineage cell-specific protein OS=Mus musculus OX=10090 GN=Hcls1 PE=1 SV=2	23	41.8	54.24	232.95	36	45	42	49	49	54	155480000	183730000	181480000	222810000	209050000	219350000
sp|P49717|MCM4_MOUSE	sp|P49717|MCM4_MOUSE	>sp|P49717|MCM4_MOUSE DNA replication licensing factor MCM4 OS=Mus musculus OX=10090 GN=Mcm4 PE=1 SV=1	5	9.4	96.735	22.974	3	4	2	6	6	6	1890500	1882400	1846900	2340400	1871700	2277700
sp|P49718|MCM5_MOUSE	sp|P49718|MCM5_MOUSE;tr|Q52KC3|Q52KC3_MOUSE	>sp|P49718|MCM5_MOUSE DNA replication licensing factor MCM5 OS=Mus musculus OX=10090 GN=Mcm5 PE=1 SV=1;>tr|Q52KC3|Q52KC3_MOUSE DNA helicase OS=Mus musculus OX=10090 GN=Mcm5 PE=1 SV=1	6	12.7	82.342	19.685	10	10	6	6	4	9	1808200	2359800	2330300	1532000	1666900	2317700
sp|P49722|PSA2_MOUSE	sp|P49722|PSA2_MOUSE;tr|Q8BKE0|Q8BKE0_MOUSE	>sp|P49722|PSA2_MOUSE Proteasome subunit alpha type-2 OS=Mus musculus OX=10090 GN=Psma2 PE=1 SV=3;>tr|Q8BKE0|Q8BKE0_MOUSE Proteasome endopeptidase complex (Fragment) OS=Mus musculus OX=10090 GN=Psma2 PE=1 SV=1	5	24.4	25.926	41.918	4	4	10	5	6	10	10945000	18751000	16606000	12696000	15462000	23297000
sp|P49962|SRP09_MOUSE	sp|P49962|SRP09_MOUSE;tr|D3YZX8|D3YZX8_MOUSE	>sp|P49962|SRP09_MOUSE Signal recognition particle 9 kDa protein OS=Mus musculus OX=10090 GN=Srp9 PE=1 SV=2;>tr|D3YZX8|D3YZX8_MOUSE Signal recognition particle 9 kDa protein OS=Mus musculus OX=10090 GN=Srp9 PE=1 SV=1	3	34.9	10.194	21.924	3	2	3	4	3	5	9148000	17074000	6364300	12711000	9754000	11225000
tr|E0CYE2|E0CYE2_MOUSE	tr|E0CYE2|E0CYE2_MOUSE;sp|P50096|IMDH1_MOUSE;tr|F7DEU6|F7DEU6_MOUSE;tr|E0CXK0|E0CXK0_MOUSE	>tr|E0CYE2|E0CYE2_MOUSE Inosine-5-monophosphate dehydrogenase OS=Mus musculus OX=10090 GN=Impdh1 PE=1 SV=1;>sp|P50096|IMDH1_MOUSE Inosine-5-monophosphate dehydrogenase 1 OS=Mus musculus OX=10090 GN=Impdh1 PE=1 SV=2;>tr|F7DEU6|F7DEU6_MOUSE Inosine-5-mono	2	4.9	52.47	4.9386	2	2	0	0	0	0	302700	196030	234590	203870	262700	367450
sp|P50171|DHB8_MOUSE	sp|P50171|DHB8_MOUSE;tr|G3UX44|G3UX44_MOUSE	>sp|P50171|DHB8_MOUSE Estradiol 17-beta-dehydrogenase 8 OS=Mus musculus OX=10090 GN=Hsd17b8 PE=1 SV=2;>tr|G3UX44|G3UX44_MOUSE H2-K region-expressed gene 6 (Fragment) OS=Mus musculus OX=10090 GN=H2-Ke6 PE=1 SV=1	5	25.1	26.588	17.486	5	1	4	2	1	2	5225100	5780900	4295800	6064400	5713700	6285800
tr|Q3TJI8|Q3TJI8_MOUSE	tr|Q3TJI8|Q3TJI8_MOUSE;sp|P50172|DHI1_MOUSE	>tr|Q3TJI8|Q3TJI8_MOUSE Corticosteroid 11-beta-dehydrogenase isozyme 1 OS=Mus musculus OX=10090 GN=Hsd11b1 PE=1 SV=1;>sp|P50172|DHI1_MOUSE Corticosteroid 11-beta-dehydrogenase isozyme 1 OS=Mus musculus OX=10090 GN=Hsd11b1 PE=1 SV=3	1	5	28.689	3.274	0	0	0	0	0	0	370010	348810	309770	464850	1150500	401430
sp|P50247|SAHH_MOUSE	sp|P50247|SAHH_MOUSE	>sp|P50247|SAHH_MOUSE Adenosylhomocysteinase OS=Mus musculus OX=10090 GN=Ahcy PE=1 SV=3	18	36.8	47.688	234.9	25	31	32	26	26	30	68481000	68840000	62873000	82148000	70934000	83921000
sp|P50295|ARY2_MOUSE	sp|P50295|ARY2_MOUSE	>sp|P50295|ARY2_MOUSE Arylamine N-acetyltransferase 2 OS=Mus musculus OX=10090 GN=Nat2 PE=1 SV=1	2	10.7	33.701	2.7037	0	1	0	0	0	1	67724	982840	418080	397530	547210	1180200
sp|P50396|GDIA_MOUSE	sp|P50396|GDIA_MOUSE	>sp|P50396|GDIA_MOUSE Rab GDP dissociation inhibitor alpha OS=Mus musculus OX=10090 GN=Gdi1 PE=1 SV=3	10	36	50.521	55.864	9	7	5	12	10	9	5101800	6357400	5249400	8906200	7646600	8330800
tr|G3UZ26|G3UZ26_MOUSE	tr|G3UZ26|G3UZ26_MOUSE;sp|P50431|GLYC_MOUSE;tr|G3UYY1|G3UYY1_MOUSE	>tr|G3UZ26|G3UZ26_MOUSE Serine hydroxymethyltransferase (Fragment) OS=Mus musculus OX=10090 GN=Shmt1 PE=1 SV=1;>sp|P50431|GLYC_MOUSE Serine hydroxymethyltransferase, cytosolic OS=Mus musculus OX=10090 GN=Shmt1 PE=1 SV=3;>tr|G3UYY1|G3UYY1_MOUSE Serine hydro	5	18.9	48.334	15.18	2	2	6	3	2	2	1208600	2333200	1879000	2359900	1490600	1338100
sp|P50516|VATA_MOUSE	sp|P50516|VATA_MOUSE;tr|D3Z1B9|D3Z1B9_MOUSE	>sp|P50516|VATA_MOUSE V-type proton ATPase catalytic subunit A OS=Mus musculus OX=10090 GN=Atp6v1a PE=1 SV=2;>tr|D3Z1B9|D3Z1B9_MOUSE V-type proton ATPase catalytic subunit A (Fragment) OS=Mus musculus OX=10090 GN=Atp6v1a PE=1 SV=1	10	21.9	68.325	80.547	6	8	8	8	8	8	3626700	4629600	3458600	3802100	3633900	4872200
sp|P50518|VATE1_MOUSE	sp|P50518|VATE1_MOUSE;tr|A0A0N4SW34|A0A0N4SW34_MOUSE;tr|A0A0N4SW07|A0A0N4SW07_MOUSE	>sp|P50518|VATE1_MOUSE V-type proton ATPase subunit E 1 OS=Mus musculus OX=10090 GN=Atp6v1e1 PE=1 SV=2;>tr|A0A0N4SW34|A0A0N4SW34_MOUSE V-type proton ATPase subunit E 1 (Fragment) OS=Mus musculus OX=10090 GN=Atp6v1e1 PE=1 SV=1;>tr|A0A0N4SW07|A0A0N4SW07_MOUS	4	20.8	26.157	18.288	6	5	7	4	7	4	2260900	3893200	3593200	2646600	2612100	3563600
sp|P50544|ACADV_MOUSE	sp|P50544|ACADV_MOUSE;tr|B1AR28|B1AR28_MOUSE	>sp|P50544|ACADV_MOUSE Very long-chain specific acyl-CoA dehydrogenase, mitochondrial OS=Mus musculus OX=10090 GN=Acadvl PE=1 SV=3;>tr|B1AR28|B1AR28_MOUSE Very long-chain-specific acyl-CoA dehydrogenase, mitochondrial OS=Mus musculus OX=10090 GN=Acadvl PE=	13	27.7	70.875	55.488	13	9	10	13	12	13	4404600	5235300	3840500	4603000	5575100	6721400
tr|Q3TGU7|Q3TGU7_MOUSE	tr|Q3TGU7|Q3TGU7_MOUSE;sp|P50580|PA2G4_MOUSE	>tr|Q3TGU7|Q3TGU7_MOUSE Proliferation-associated 2G4 OS=Mus musculus OX=10090 GN=Pa2g4 PE=1 SV=1;>sp|P50580|PA2G4_MOUSE Proliferation-associated protein 2G4 OS=Mus musculus OX=10090 GN=Pa2g4 PE=1 SV=3	15	40.9	43.698	80.03	16	26	20	22	17	16	26838000	35020000	28953000	38309000	26433000	31734000
sp|P51125|ICAL_MOUSE	sp|P51125|ICAL_MOUSE;tr|Q8CE80|Q8CE80_MOUSE;tr|A0A338P6J9|A0A338P6J9_MOUSE;tr|Q921U7|Q921U7_MOUSE;tr|Q8C281|Q8C281_MOUSE;tr|Q8CE04|Q8CE04_MOUSE	>sp|P51125|ICAL_MOUSE Calpastatin OS=Mus musculus OX=10090 GN=Cast PE=1 SV=2;>tr|Q8CE80|Q8CE80_MOUSE Calpastatin OS=Mus musculus OX=10090 GN=Cast PE=1 SV=1;>tr|A0A338P6J9|A0A338P6J9_MOUSE Calpastatin (Fragment) OS=Mus musculus OX=10090 GN=Cast PE=1 SV=1;>t	17	29.9	84.921	309.37	24	20	23	34	36	42	14882000	16958000	17963000	36087000	24979000	24747000
sp|P51150|RAB7A_MOUSE	sp|P51150|RAB7A_MOUSE;tr|A0A0N4SVR6|A0A0N4SVR6_MOUSE;tr|A0A0N4SVG9|A0A0N4SVG9_MOUSE	>sp|P51150|RAB7A_MOUSE Ras-related protein Rab-7a OS=Mus musculus OX=10090 GN=Rab7a PE=1 SV=2;>tr|A0A0N4SVR6|A0A0N4SVR6_MOUSE RAB7, member RAS oncogene family OS=Mus musculus OX=10090 GN=Rab7 PE=1 SV=1;>tr|A0A0N4SVG9|A0A0N4SVG9_MOUSE RAB7, member RAS oncog	6	37.7	23.489	30.783	8	4	6	6	6	10	3910100	4149100	5952200	5076600	6573300	6746600
tr|A0A0G2JES3|A0A0G2JES3_MOUSE	tr|A0A0G2JES3|A0A0G2JES3_MOUSE;tr|A0A140T8T4|A0A140T8T4_MOUSE;sp|P51410|RL9_MOUSE	>tr|A0A0G2JES3|A0A0G2JES3_MOUSE 60S ribosomal protein L9 (Fragment) OS=Mus musculus OX=10090 GN=Rpl9 PE=1 SV=1;>tr|A0A140T8T4|A0A140T8T4_MOUSE Ribosomal protein L9, pseudogene 6 OS=Mus musculus OX=10090 GN=Rpl9-ps6 PE=4 SV=1;>sp|P51410|RL9_MOUSE 60S riboso	2	5.8	21.622	8.4529	3	2	2	1	1	1	5230500	6783400	5589300	10728000	5834100	6479500
sp|P51660|DHB4_MOUSE	sp|P51660|DHB4_MOUSE	>sp|P51660|DHB4_MOUSE Peroxisomal multifunctional enzyme type 2 OS=Mus musculus OX=10090 GN=Hsd17b4 PE=1 SV=3	6	10.3	79.481	22.264	5	4	4	4	4	4	1729900	1941200	1612100	2166800	2269900	1623800
tr|A0A338P7B7|A0A338P7B7_MOUSE	tr|A0A338P7B7|A0A338P7B7_MOUSE;sp|P51807|DYLT1_MOUSE	>tr|A0A338P7B7|A0A338P7B7_MOUSE Dynein light chain Tctex-type 1A OS=Mus musculus OX=10090 GN=Dynlt1a PE=1 SV=1;>sp|P51807|DYLT1_MOUSE Dynein light chain Tctex-type 1 OS=Mus musculus OX=10090 GN=Dynlt1 PE=1 SV=1	1	14.3	12.242	3.9141	1	1	1	1	1	1	1764300	2294100	1988500	1984200	1620700	2159100
sp|P51859|HDGF_MOUSE	sp|P51859|HDGF_MOUSE	>sp|P51859|HDGF_MOUSE Hepatoma-derived growth factor OS=Mus musculus OX=10090 GN=Hdgf PE=1 SV=2	7	59.1	26.268	156.43	13	16	15	21	17	17	69794000	75154000	79129000	132300000	114480000	112850000
sp|P51881|ADT2_MOUSE	sp|P51881|ADT2_MOUSE	>sp|P51881|ADT2_MOUSE ADP/ATP translocase 2 OS=Mus musculus OX=10090 GN=Slc25a5 PE=1 SV=3	4	28.2	32.931	26.654	10	11	10	13	10	11	16418000	21312000	21479000	19808000	26699000	16905000
tr|A0A087WSQ7|A0A087WSQ7_MOUSE	tr|A0A087WSQ7|A0A087WSQ7_MOUSE;tr|A0A087WSG5|A0A087WSG5_MOUSE;sp|P51949|MAT1_MOUSE	>tr|A0A087WSQ7|A0A087WSQ7_MOUSE CDK-activating kinase assembly factor MAT1 OS=Mus musculus OX=10090 GN=Mnat1 PE=1 SV=1;>tr|A0A087WSG5|A0A087WSG5_MOUSE CDK-activating kinase assembly factor MAT1 OS=Mus musculus OX=10090 GN=Mnat1 PE=1 SV=1;>sp|P51949|MAT1_MO	1	17.2	10.598	4.3247	2	3	1	1	1	1	586990	1134100	0	1253800	0	1645300
sp|P52293|IMA1_MOUSE	sp|P52293|IMA1_MOUSE;tr|F2Z431|F2Z431_MOUSE;tr|A2A602|A2A602_MOUSE;tr|A2A600|A2A600_MOUSE;tr|A2A601|A2A601_MOUSE;tr|A6PW68|A6PW68_MOUSE	>sp|P52293|IMA1_MOUSE Importin subunit alpha-1 OS=Mus musculus OX=10090 GN=Kpna2 PE=1 SV=2;>tr|F2Z431|F2Z431_MOUSE Importin subunit alpha-1 OS=Mus musculus OX=10090 GN=Kpna2 PE=1 SV=1;>tr|A2A602|A2A602_MOUSE Importin subunit alpha-1 OS=Mus musculus OX=1009	2	6	57.927	3.5936	2	2	0	0	0	2	199520	0	424570	208300	195510	189440
sp|P52432|RPAC1_MOUSE	sp|P52432|RPAC1_MOUSE;tr|G3UXX5|G3UXX5_MOUSE;tr|D3Z7Q8|D3Z7Q8_MOUSE;tr|D3Z3D6|D3Z3D6_MOUSE	>sp|P52432|RPAC1_MOUSE DNA-directed RNA polymerases I and III subunit RPAC1 OS=Mus musculus OX=10090 GN=Polr1c PE=1 SV=3;>tr|G3UXX5|G3UXX5_MOUSE DNA-directed RNA polymerases I and III subunit RPAC1 (Fragment) OS=Mus musculus OX=10090 GN=Polr1c PE=1 SV=1;>t	3	11.6	39.106	8.9002	3	2	1	2	3	1	1216400	2939100	1740400	3852500	2444500	1766100
sp|P52479|UBP10_MOUSE	sp|P52479|UBP10_MOUSE	>sp|P52479|UBP10_MOUSE Ubiquitin carboxyl-terminal hydrolase 10 OS=Mus musculus OX=10090 GN=Usp10 PE=1 SV=3	3	4.8	87.021	7.7182	4	1	2	2	4	4	432170	414230	350660	373650	442150	309350
sp|P52480|KPYM_MOUSE	sp|P52480|KPYM_MOUSE	>sp|P52480|KPYM_MOUSE Pyruvate kinase PKM OS=Mus musculus OX=10090 GN=Pkm PE=1 SV=4	30	57.3	57.844	323.31	51	69	70	74	71	67	119570000	162730000	140150000	190430000	121150000	149040000
sp|P52503|NDUS6_MOUSE	sp|P52503|NDUS6_MOUSE;tr|A0A1Y7VKP8|A0A1Y7VKP8_MOUSE;tr|A0A1Y7VM38|A0A1Y7VM38_MOUSE	>sp|P52503|NDUS6_MOUSE NADH dehydrogenase [ubiquinone] iron-sulfur protein 6, mitochondrial OS=Mus musculus OX=10090 GN=Ndufs6 PE=1 SV=2;>tr|A0A1Y7VKP8|A0A1Y7VKP8_MOUSE NADH dehydrogenase [ubiquinone] iron-sulfur protein 6, mitochondrial OS=Mus musculus OX	5	54.3	13.02	13.534	6	5	3	7	9	6	17848000	20710000	17158000	24083000	36943000	30859000
sp|P52623|UCK1_MOUSE	sp|P52623|UCK1_MOUSE;tr|A2AN37|A2AN37_MOUSE;tr|A0A0A6YXG9|A0A0A6YXG9_MOUSE;tr|F7CBX2|F7CBX2_MOUSE	>sp|P52623|UCK1_MOUSE Uridine-cytidine kinase 1 OS=Mus musculus OX=10090 GN=Uck1 PE=1 SV=2;>tr|A2AN37|A2AN37_MOUSE Uridine-cytidine kinase OS=Mus musculus OX=10090 GN=Uck1 PE=1 SV=1;>tr|A0A0A6YXG9|A0A0A6YXG9_MOUSE Uridine-cytidine kinase 2 (Fragment) OS=Mu	1	7.9	31.068	5.4859	1	2	1	0	0	1	0	0	0	507620	0	319510
sp|P52624|UPP1_MOUSE	sp|P52624|UPP1_MOUSE	>sp|P52624|UPP1_MOUSE Uridine phosphorylase 1 OS=Mus musculus OX=10090 GN=Upp1 PE=1 SV=2	1	7.1	34.086	4.9331	0	0	0	1	1	0	0	0	0	1178700	1272000	485410
sp|P52760|RIDA_MOUSE	sp|P52760|RIDA_MOUSE	>sp|P52760|RIDA_MOUSE 2-iminobutanoate/2-iminopropanoate deaminase OS=Mus musculus OX=10090 GN=Rida PE=1 SV=3	2	22.2	14.255	6.1072	3	1	3	1	1	1	5762100	5905500	4097600	4387600	4395000	5520900
tr|A2A8E7|A2A8E7_MOUSE	tr|A2A8E7|A2A8E7_MOUSE;sp|P52825|CPT2_MOUSE	>tr|A2A8E7|A2A8E7_MOUSE Carnitine O-palmitoyltransferase 2, mitochondrial OS=Mus musculus OX=10090 GN=Cpt2 PE=1 SV=1;>sp|P52825|CPT2_MOUSE Carnitine O-palmitoyltransferase 2, mitochondrial OS=Mus musculus OX=10090 GN=Cpt2 PE=1 SV=2	1	6.7	24.906	3.7358	1	0	1	1	1	1	772780	1628500	1999700	1400300	875200	1070100
tr|A0A3B2WDD2|A0A3B2WDD2_MOUSE	tr|A0A3B2WDD2|A0A3B2WDD2_MOUSE;tr|A0A3B2WBL1|A0A3B2WBL1_MOUSE;tr|Q5XJF6|Q5XJF6_MOUSE;sp|P53026|RL10A_MOUSE;tr|A0A3B2W820|A0A3B2W820_MOUSE;tr|A0A3B2W824|A0A3B2W824_MOUSE	>tr|A0A3B2WDD2|A0A3B2WDD2_MOUSE Ribosomal protein OS=Mus musculus OX=10090 GN=Rpl10a PE=1 SV=1;>tr|A0A3B2WBL1|A0A3B2WBL1_MOUSE Ribosomal protein OS=Mus musculus OX=10090 GN=Rpl10a PE=1 SV=1;>tr|Q5XJF6|Q5XJF6_MOUSE Ribosomal protein OS=Mus musculus OX=10090	5	22.6	21.636	10.386	4	1	4	0	1	2	6235800	4640200	6826600	3044200	3141900	4015800
tr|F8VQ72|F8VQ72_MOUSE	tr|F8VQ72|F8VQ72_MOUSE;sp|P53349|M3K1_MOUSE	>tr|F8VQ72|F8VQ72_MOUSE Mitogen-activated protein kinase kinase kinase 1 OS=Mus musculus OX=10090 GN=Map3k1 PE=1 SV=1;>sp|P53349|M3K1_MOUSE Mitogen-activated protein kinase kinase kinase 1 OS=Mus musculus OX=10090 GN=Map3k1 PE=1 SV=3	2	3.7	161.41	2.9579	1	0	0	1	1	2	34903	0	75197	102010	112420	82047
sp|P53395|ODB2_MOUSE	sp|P53395|ODB2_MOUSE	>sp|P53395|ODB2_MOUSE Lipoamide acyltransferase component of branched-chain alpha-keto acid dehydrogenase complex, mitochondrial OS=Mus musculus OX=10090 GN=Dbt PE=1 SV=2	4	9.8	53.246	9.8368	2	1	2	2	3	4	916640	794290	940380	1649900	3602200	1566400
sp|P53810|PIPNA_MOUSE	sp|P53810|PIPNA_MOUSE;tr|J3QQ30|J3QQ30_MOUSE;tr|J3QPW1|J3QPW1_MOUSE;tr|F8WGG5|F8WGG5_MOUSE	>sp|P53810|PIPNA_MOUSE Phosphatidylinositol transfer protein alpha isoform OS=Mus musculus OX=10090 GN=Pitpna PE=1 SV=2;>tr|J3QQ30|J3QQ30_MOUSE Phosphatidylinositol transfer protein alpha isoform OS=Mus musculus OX=10090 GN=Pitpna PE=1 SV=1;>tr|J3QPW1|J3QP	8	44.3	31.893	37.032	10	5	11	10	11	15	14657000	18663000	14840000	20861000	17124000	22190000
sp|P53994|RAB2A_MOUSE	sp|P53994|RAB2A_MOUSE	>sp|P53994|RAB2A_MOUSE Ras-related protein Rab-2A OS=Mus musculus OX=10090 GN=Rab2a PE=1 SV=1	3	16	23.547	10.736	3	4	3	5	3	5	1761500	1663400	1358100	3217000	2506600	3076800
sp|P53996|CNBP_MOUSE	sp|P53996|CNBP_MOUSE	>sp|P53996|CNBP_MOUSE Cellular nucleic acid-binding protein OS=Mus musculus OX=10090 GN=Cnbp PE=1 SV=2	1	8.4	19.592	39.582	1	4	2	2	2	3	780440	2458900	1865700	3287700	1966500	4886000
sp|P54071|IDHP_MOUSE	sp|P54071|IDHP_MOUSE;tr|D6RIL6|D6RIL6_MOUSE	>sp|P54071|IDHP_MOUSE Isocitrate dehydrogenase [NADP], mitochondrial OS=Mus musculus OX=10090 GN=Idh2 PE=1 SV=3;>tr|D6RIL6|D6RIL6_MOUSE Isocitrate dehydrogenase [NADP], mitochondrial OS=Mus musculus OX=10090 GN=Idh2 PE=1 SV=1	10	29	50.906	33.65	10	7	4	13	10	10	4757600	4871300	4216100	6751100	3454800	4199700
tr|D3Z1Z8|D3Z1Z8_MOUSE	tr|D3Z1Z8|D3Z1Z8_MOUSE;tr|D3Z5N2|D3Z5N2_MOUSE;sp|P54227|STMN1_MOUSE	>tr|D3Z1Z8|D3Z1Z8_MOUSE Stathmin (Fragment) OS=Mus musculus OX=10090 GN=Stmn1 PE=1 SV=1;>tr|D3Z5N2|D3Z5N2_MOUSE Stathmin OS=Mus musculus OX=10090 GN=Stmn1 PE=1 SV=1;>sp|P54227|STMN1_MOUSE Stathmin OS=Mus musculus OX=10090 GN=Stmn1 PE=1 SV=2	6	38.2	11.729	44.437	10	15	9	11	12	15	20623000	25806000	21963000	29375000	33768000	34443000
sp|P54276|MSH6_MOUSE	sp|P54276|MSH6_MOUSE	>sp|P54276|MSH6_MOUSE DNA mismatch repair protein Msh6 OS=Mus musculus OX=10090 GN=Msh6 PE=1 SV=3	4	3.8	151.08	12.982	3	2	3	3	0	2	367250	295780	256480	179490	219990	261660
sp|P54728|RD23B_MOUSE	sp|P54728|RD23B_MOUSE	>sp|P54728|RD23B_MOUSE UV excision repair protein RAD23 homolog B OS=Mus musculus OX=10090 GN=Rad23b PE=1 SV=2	11	35.8	43.512	37.001	5	14	10	11	13	12	26521000	32360000	32860000	42128000	37065000	35958000
sp|P54729|NUB1_MOUSE	sp|P54729|NUB1_MOUSE;tr|A0A0G2JGQ4|A0A0G2JGQ4_MOUSE	>sp|P54729|NUB1_MOUSE NEDD8 ultimate buster 1 OS=Mus musculus OX=10090 GN=Nub1 PE=1 SV=2;>tr|A0A0G2JGQ4|A0A0G2JGQ4_MOUSE NEDD8 ultimate buster 1 OS=Mus musculus OX=10090 GN=Nub1 PE=1 SV=1	1	3.4	70.306	2.6145	0	0	0	1	1	1	204750	1315100	394560	475650	302340	362920
sp|P54731|FAF1_MOUSE	sp|P54731|FAF1_MOUSE	>sp|P54731|FAF1_MOUSE FAS-associated factor 1 OS=Mus musculus OX=10090 GN=Faf1 PE=1 SV=2	4	7.6	73.862	8.3815	2	2	2	1	1	2	613770	742590	356820	56899	720330	384890
sp|P54775|PRS6B_MOUSE	sp|P54775|PRS6B_MOUSE;tr|A0A140LIZ5|A0A140LIZ5_MOUSE	>sp|P54775|PRS6B_MOUSE 26S proteasome regulatory subunit 6B OS=Mus musculus OX=10090 GN=Psmc4 PE=1 SV=2;>tr|A0A140LIZ5|A0A140LIZ5_MOUSE 26S proteasome regulatory subunit 6B OS=Mus musculus OX=10090 GN=Psmc4 PE=1 SV=1	17	52.2	47.408	70.889	12	17	23	23	22	20	11455000	11406000	10733000	22444000	13715000	16139000
sp|P54822|PUR8_MOUSE	sp|P54822|PUR8_MOUSE;tr|E9Q242|E9Q242_MOUSE;tr|E9Q3T7|E9Q3T7_MOUSE	>sp|P54822|PUR8_MOUSE Adenylosuccinate lyase OS=Mus musculus OX=10090 GN=Adsl PE=1 SV=2;>tr|E9Q242|E9Q242_MOUSE Adenylosuccinate lyase OS=Mus musculus OX=10090 GN=Adsl PE=1 SV=1;>tr|E9Q3T7|E9Q3T7_MOUSE Adenylosuccinate lyase OS=Mus musculus OX=10090 GN=Ads	11	28.3	54.866	44.515	5	9	6	14	6	7	5658600	8867800	7505700	12832000	8336300	9460000
sp|P54823|DDX6_MOUSE	sp|P54823|DDX6_MOUSE	>sp|P54823|DDX6_MOUSE Probable ATP-dependent RNA helicase DDX6 OS=Mus musculus OX=10090 GN=Ddx6 PE=1 SV=1	7	18.2	54.191	21.795	5	5	3	10	3	6	4401200	4932000	4662700	5949200	5369200	3468300
sp|P54923|ADPRH_MOUSE	sp|P54923|ADPRH_MOUSE	>sp|P54923|ADPRH_MOUSE [Protein ADP-ribosylarginine] hydrolase OS=Mus musculus OX=10090 GN=Adprh PE=1 SV=1	7	31.8	40.068	46.657	8	7	5	7	5	4	8119100	15634000	9075600	7181400	6805500	9221500
sp|P55194|3BP1_MOUSE	sp|P55194|3BP1_MOUSE;tr|A2A5V3|A2A5V3_MOUSE;tr|A2A5V2|A2A5V2_MOUSE;tr|S4R2D3|S4R2D3_MOUSE;tr|A0A2R8W6I7|A0A2R8W6I7_MOUSE	>sp|P55194|3BP1_MOUSE SH3 domain-binding protein 1 OS=Mus musculus OX=10090 GN=Sh3bp1 PE=1 SV=3;>tr|A2A5V3|A2A5V3_MOUSE SH3 domain-binding protein 1 OS=Mus musculus OX=10090 GN=Sh3bp1 PE=1 SV=1;>tr|A2A5V2|A2A5V2_MOUSE SH3 domain-binding protein 1 OS=Mus mu	20	45.1	74.172	136.32	16	24	19	16	19	19	5668200	8699600	7490700	11762000	8007500	8827500
sp|P55258|RAB8A_MOUSE	sp|P55258|RAB8A_MOUSE	>sp|P55258|RAB8A_MOUSE Ras-related protein Rab-8A OS=Mus musculus OX=10090 GN=Rab8a PE=1 SV=2	2	15.9	23.668	4.5716	1	1	2	1	1	1	828580	1254700	1006700	1228100	981050	1199800
sp|P55264|ADK_MOUSE	sp|P55264|ADK_MOUSE;tr|A0A286YCD7|A0A286YCD7_MOUSE;tr|A0A286YCN3|A0A286YCN3_MOUSE	>sp|P55264|ADK_MOUSE Adenosine kinase OS=Mus musculus OX=10090 GN=Adk PE=1 SV=2;>tr|A0A286YCD7|A0A286YCD7_MOUSE Adenosine kinase (Fragment) OS=Mus musculus OX=10090 GN=Adk PE=1 SV=1;>tr|A0A286YCN3|A0A286YCN3_MOUSE Adenosine kinase (Fragment) OS=Mus musculu	7	22.7	40.148	22.998	8	11	7	8	9	5	9953600	11418000	10300000	10132000	11334000	11387000
sp|P55302|AMRP_MOUSE	sp|P55302|AMRP_MOUSE	>sp|P55302|AMRP_MOUSE Alpha-2-macroglobulin receptor-associated protein OS=Mus musculus OX=10090 GN=Lrpap1 PE=1 SV=1	3	12.2	42.215	11.146	2	1	0	4	4	3	1024400	422980	198940	1308400	1886700	1702600
tr|A0A0R4J1H6|A0A0R4J1H6_MOUSE	tr|A0A0R4J1H6|A0A0R4J1H6_MOUSE;tr|E9QP99|E9QP99_MOUSE;sp|P55937|GOGA3_MOUSE	>tr|A0A0R4J1H6|A0A0R4J1H6_MOUSE Golgin subfamily A member 3 OS=Mus musculus OX=10090 GN=Golga3 PE=1 SV=1;>tr|E9QP99|E9QP99_MOUSE Golgin subfamily A member 3 OS=Mus musculus OX=10090 GN=Golga3 PE=1 SV=1;>sp|P55937|GOGA3_MOUSE Golgin subfamily A member 3 OS=	10	9.3	162.89	26.029	4	2	9	11	3	7	622560	753860	796350	983140	194500	682220
sp|P56135|ATPK_MOUSE	sp|P56135|ATPK_MOUSE;tr|F8WHP8|F8WHP8_MOUSE	>sp|P56135|ATPK_MOUSE ATP synthase subunit f, mitochondrial OS=Mus musculus OX=10090 GN=Atp5mf PE=1 SV=3;>tr|F8WHP8|F8WHP8_MOUSE ATP synthase, H+-transporting, mitochondrial F0 complex, subunit F2 OS=Mus musculus OX=10090 GN=Atp5j2 PE=1 SV=1	3	36.4	10.344	10.479	3	3	3	4	3	2	17721000	20972000	5630200	13687000	10735000	10807000
sp|P56183|RRP1_MOUSE	sp|P56183|RRP1_MOUSE;tr|A0A1W2P7C5|A0A1W2P7C5_MOUSE	>sp|P56183|RRP1_MOUSE Ribosomal RNA processing protein 1 homolog A OS=Mus musculus OX=10090 GN=Rrp1 PE=1 SV=2;>tr|A0A1W2P7C5|A0A1W2P7C5_MOUSE Ribosomal RNA-processing protein 1 homolog A OS=Mus musculus OX=10090 GN=Rrp1 PE=1 SV=1	2	5.5	54.776	2.8881	0	0	1	1	0	0	313490	278190	313630	345850	601040	0
sp|P56212|ARP19_MOUSE	sp|P56212|ARP19_MOUSE;tr|E9Q827|E9Q827_MOUSE	>sp|P56212|ARP19_MOUSE cAMP-regulated phosphoprotein 19 OS=Mus musculus OX=10090 GN=Arpp19 PE=1 SV=2;>tr|E9Q827|E9Q827_MOUSE cAMP-regulated phosphoprotein 19 OS=Mus musculus OX=10090 GN=Arpp19 PE=1 SV=1	4	68.8	12.293	35.006	6	6	1	7	7	8	22092000	27846000	34801000	43970000	40233000	39737000
tr|A0A3Q4EGL6|A0A3Q4EGL6_MOUSE	tr|A0A3Q4EGL6|A0A3Q4EGL6_MOUSE;sp|P56213|ALR_MOUSE	>tr|A0A3Q4EGL6|A0A3Q4EGL6_MOUSE FAD-linked sulfhydryl oxidase ALR OS=Mus musculus OX=10090 GN=Gfer PE=4 SV=1;>sp|P56213|ALR_MOUSE FAD-linked sulfhydryl oxidase ALR OS=Mus musculus OX=10090 GN=Gfer PE=1 SV=2	2	12.3	21.488	6.9223	1	0	0	1	0	0	1216000	1481200	908200	1199400	0	1183500
sp|P56376|ACYP1_MOUSE	sp|P56376|ACYP1_MOUSE;tr|E9QJT5|E9QJT5_MOUSE	>sp|P56376|ACYP1_MOUSE Acylphosphatase-1 OS=Mus musculus OX=10090 GN=Acyp1 PE=1 SV=2;>tr|E9QJT5|E9QJT5_MOUSE Acylphosphatase OS=Mus musculus OX=10090 GN=Acyp1 PE=1 SV=1	5	45.5	11.241	13.401	3	3	3	4	4	3	7520700	10891000	8498800	20899000	10095000	7017800
sp|P56391|CX6B1_MOUSE	sp|P56391|CX6B1_MOUSE;tr|A0A140LIU3|A0A140LIU3_MOUSE	>sp|P56391|CX6B1_MOUSE Cytochrome c oxidase subunit 6B1 OS=Mus musculus OX=10090 GN=Cox6b1 PE=1 SV=2;>tr|A0A140LIU3|A0A140LIU3_MOUSE Cytochrome c oxidase subunit 6B1 OS=Mus musculus OX=10090 GN=Cox6b1 PE=1 SV=1	5	70.9	10.071	31.541	8	6	6	11	9	10	28160000	33968000	30002000	60474000	46416000	56302000
sp|P56394|COX17_MOUSE	sp|P56394|COX17_MOUSE	>sp|P56394|COX17_MOUSE Cytochrome c oxidase copper chaperone OS=Mus musculus OX=10090 GN=Cox17 PE=1 SV=2	1	25.4	6.784	8.2402	1	1	2	1	1	0	11691000	18274000	12761000	20733000	35733000	19672000
tr|G5E850|G5E850_MOUSE	tr|G5E850|G5E850_MOUSE;sp|P56395|CYB5_MOUSE	>tr|G5E850|G5E850_MOUSE Cytochrome b-5, isoform CRA_a OS=Mus musculus OX=10090 GN=Cyb5a PE=1 SV=1;>sp|P56395|CYB5_MOUSE Cytochrome b5 OS=Mus musculus OX=10090 GN=Cyb5a PE=1 SV=2	5	56.1	11.142	74.182	14	15	13	12	14	14	75495000	106380000	109300000	129630000	105450000	158900000
tr|Q3U4W8|Q3U4W8_MOUSE	tr|Q3U4W8|Q3U4W8_MOUSE;sp|P56399|UBP5_MOUSE	>tr|Q3U4W8|Q3U4W8_MOUSE Ubiquitin carboxyl-terminal hydrolase OS=Mus musculus OX=10090 GN=Usp5 PE=1 SV=1;>sp|P56399|UBP5_MOUSE Ubiquitin carboxyl-terminal hydrolase 5 OS=Mus musculus OX=10090 GN=Usp5 PE=1 SV=1	15	25.5	93.354	85.759	20	22	15	17	19	14	9381300	12470000	10340000	12102000	13713000	12265000
sp|P56480|ATPB_MOUSE	sp|P56480|ATPB_MOUSE	>sp|P56480|ATPB_MOUSE ATP synthase subunit beta, mitochondrial OS=Mus musculus OX=10090 GN=Atp5f1b PE=1 SV=2	25	57.8	56.3	323.31	117	125	122	140	144	140	368130000	517850000	386060000	804560000	551080000	529000000
sp|P56812|PDCD5_MOUSE	sp|P56812|PDCD5_MOUSE;tr|D3Z7Q5|D3Z7Q5_MOUSE	>sp|P56812|PDCD5_MOUSE Programmed cell death protein 5 OS=Mus musculus OX=10090 GN=Pdcd5 PE=1 SV=3;>tr|D3Z7Q5|D3Z7Q5_MOUSE Programmed cell death protein 5 OS=Mus musculus OX=10090 GN=Pdcd5 PE=1 SV=1	6	45.2	14.275	55.073	9	9	7	9	7	8	25874000	25086000	18656000	24881000	20843000	24530000
tr|G3UXT7|G3UXT7_MOUSE	tr|G3UXT7|G3UXT7_MOUSE;tr|Q8CFQ9|Q8CFQ9_MOUSE;sp|P56959|FUS_MOUSE	>tr|G3UXT7|G3UXT7_MOUSE RNA-binding protein FUS (Fragment) OS=Mus musculus OX=10090 GN=Fus PE=1 SV=1;>tr|Q8CFQ9|Q8CFQ9_MOUSE Fusion, derived from t(1216) malignant liposarcoma (Human) OS=Mus musculus OX=10090 GN=Fus PE=1 SV=1;>sp|P56959|FUS_MOUSE RNA-bindi	9	67.7	13.897	140.63	32	27	30	33	32	32	226420000	288550000	223950000	318310000	245060000	248970000
sp|P57016|LAD1_MOUSE	sp|P57016|LAD1_MOUSE	>sp|P57016|LAD1_MOUSE Ladinin-1 OS=Mus musculus OX=10090 GN=Lad1 PE=1 SV=1	2	4.7	58.863	3.2073	0	1	0	0	0	0	0	2823800	0	1611300	0	83856
sp|P57759|ERP29_MOUSE	sp|P57759|ERP29_MOUSE	>sp|P57759|ERP29_MOUSE Endoplasmic reticulum resident protein 29 OS=Mus musculus OX=10090 GN=Erp29 PE=1 SV=2	5	23.7	28.823	32.275	5	13	3	8	10	4	12675000	17429000	7758100	19184000	19783000	13833000
tr|E9QN08|E9QN08_MOUSE	tr|E9QN08|E9QN08_MOUSE;tr|Q80T06|Q80T06_MOUSE;sp|P57776|EF1D_MOUSE;tr|Q91VK2|Q91VK2_MOUSE;tr|A0A0R4J1E2|A0A0R4J1E2_MOUSE;tr|D3YUQ9|D3YUQ9_MOUSE;tr|D3YZT9|D3YZT9_MOUSE;tr|D3YY68|D3YY68_MOUSE	>tr|E9QN08|E9QN08_MOUSE Elongation factor 1-delta (Fragment) OS=Mus musculus OX=10090 GN=Eef1d PE=1 SV=1;>tr|Q80T06|Q80T06_MOUSE Elongation factor 1-delta OS=Mus musculus OX=10090 GN=Eef1d PE=1 SV=1;>sp|P57776|EF1D_MOUSE Elongation factor 1-delta OS=Mus mu	1	48.6	27.217	228.09	26	22	26	21	20	18	138560000	144770000	137470000	169050000	142040000	114660000
sp|P57780|ACTN4_MOUSE	sp|P57780|ACTN4_MOUSE;tr|A0A1L1SV25|A0A1L1SV25_MOUSE;tr|E9Q2W9|E9Q2W9_MOUSE	>sp|P57780|ACTN4_MOUSE Alpha-actinin-4 OS=Mus musculus OX=10090 GN=Actn4 PE=1 SV=1;>tr|A0A1L1SV25|A0A1L1SV25_MOUSE Alpha-actinin-4 OS=Mus musculus OX=10090 GN=Actn4 PE=1 SV=1;>tr|E9Q2W9|E9Q2W9_MOUSE Alpha-actinin-4 (Fragment) OS=Mus musculus OX=10090 GN=Ac	29	52.7	104.98	323.31	58	62	68	81	66	64	39412000	51977000	51168000	61410000	58619000	58095000
sp|P57784|RU2A_MOUSE	sp|P57784|RU2A_MOUSE	>sp|P57784|RU2A_MOUSE U2 small nuclear ribonucleoprotein A OS=Mus musculus OX=10090 GN=Snrpa1 PE=1 SV=2	7	31	28.357	34.352	4	5	3	5	4	3	9015800	11449000	3657000	14603000	9636600	7234100
sp|P58044|IDI1_MOUSE	sp|P58044|IDI1_MOUSE;tr|H3BLF8|H3BLF8_MOUSE;tr|G3XA48|G3XA48_MOUSE	>sp|P58044|IDI1_MOUSE Isopentenyl-diphosphate Delta-isomerase 1 OS=Mus musculus OX=10090 GN=Idi1 PE=1 SV=1;>tr|H3BLF8|H3BLF8_MOUSE Isopentenyl-diphosphate Delta-isomerase 1 (Fragment) OS=Mus musculus OX=10090 GN=Idi1 PE=1 SV=1;>tr|G3XA48|G3XA48_MOUSE Isope	3	18.9	26.289	6.1912	0	0	0	2	0	3	795960	1188900	1173200	1686100	1296500	1032000
tr|Q8BZR4|Q8BZR4_MOUSE	tr|Q8BZR4|Q8BZR4_MOUSE;sp|P58137|ACOT8_MOUSE	>tr|Q8BZR4|Q8BZR4_MOUSE Acyl-coenzyme A thioesterase 8 OS=Mus musculus OX=10090 GN=Acot8 PE=1 SV=1;>sp|P58137|ACOT8_MOUSE Acyl-coenzyme A thioesterase 8 OS=Mus musculus OX=10090 GN=Acot8 PE=1 SV=1	2	10.1	29.542	4.661	1	0	0	2	0	0	286150	337160	377920	616420	475230	336340
sp|P58252|EF2_MOUSE	sp|P58252|EF2_MOUSE	>sp|P58252|EF2_MOUSE Elongation factor 2 OS=Mus musculus OX=10090 GN=Eef2 PE=1 SV=2	33	36.6	95.313	306.93	56	57	64	63	53	64	56946000	62507000	54648000	68771000	58011000	77052000
tr|F6U775|F6U775_MOUSE	tr|F6U775|F6U775_MOUSE;tr|E0CXD1|E0CXD1_MOUSE;sp|P58281|OPA1_MOUSE;tr|H7BX01|H7BX01_MOUSE	>tr|F6U775|F6U775_MOUSE Dynamin-like 120 kDa protein, mitochondrial (Fragment) OS=Mus musculus OX=10090 GN=Opa1 PE=1 SV=1;>tr|E0CXD1|E0CXD1_MOUSE Dynamin-like 120 kDa protein, mitochondrial OS=Mus musculus OX=10090 GN=Opa1 PE=1 SV=1;>sp|P58281|OPA1_MOUSE D	1	4.7	33.83	2.749	1	1	2	2	3	3	163690	420470	742140	505830	845240	762990
sp|P58389|PTPA_MOUSE	sp|P58389|PTPA_MOUSE;tr|B7ZDE0|B7ZDE0_MOUSE;tr|A2AWF0|A2AWF0_MOUSE;tr|A2AWE9|A2AWE9_MOUSE	>sp|P58389|PTPA_MOUSE Serine/threonine-protein phosphatase 2A activator OS=Mus musculus OX=10090 GN=Ptpa PE=1 SV=1;>tr|B7ZDE0|B7ZDE0_MOUSE Serine/threonine-protein phosphatase 2A activator OS=Mus musculus OX=10090 GN=Ptpa PE=1 SV=1;>tr|A2AWF0|A2AWF0_MOUSE	4	13.6	36.71	20.529	4	4	6	8	4	6	5197800	8946200	3748800	6894200	5862900	6809100
sp|P58404|STRN4_MOUSE	sp|P58404|STRN4_MOUSE;tr|V9GXT1|V9GXT1_MOUSE	>sp|P58404|STRN4_MOUSE Striatin-4 OS=Mus musculus OX=10090 GN=Strn4 PE=1 SV=2;>tr|V9GXT1|V9GXT1_MOUSE Striatin-4 (Fragment) OS=Mus musculus OX=10090 GN=Strn4 PE=1 SV=1	2	5.5	81.644	3.8155	0	0	0	2	0	1	0	275770	0	276270	91635	157140
tr|A0A0R4J282|A0A0R4J282_MOUSE	tr|A0A0R4J282|A0A0R4J282_MOUSE;tr|H3BJ24|H3BJ24_MOUSE;tr|A0A0R4J1H9|A0A0R4J1H9_MOUSE;tr|H3BL33|H3BL33_MOUSE;tr|H3BJM1|H3BJM1_MOUSE;tr|E2S038|E2S038_MOUSE;sp|P58462|FOXP1_MOUSE;tr|H3BLF2|H3BLF2_MOUSE;tr|D3Z6Q4|D3Z6Q4_MOUSE;tr|D3Z6Q3|D3Z6Q3_MOUSE;tr|H3BJR8|H3BJR8_MOUSE	>tr|A0A0R4J282|A0A0R4J282_MOUSE Forkhead box protein P1 OS=Mus musculus OX=10090 GN=Foxp1 PE=1 SV=1;>tr|H3BJ24|H3BJ24_MOUSE Forkhead box protein P1 OS=Mus musculus OX=10090 GN=Foxp1 PE=1 SV=1;>tr|A0A0R4J1H9|A0A0R4J1H9_MOUSE Forkhead box protein P1 OS=Mus m	4	9.2	64.549	11.339	4	3	4	5	7	7	1282400	1270900	2222300	1892300	2427700	2489800
sp|P58742|AAAS_MOUSE	sp|P58742|AAAS_MOUSE	>sp|P58742|AAAS_MOUSE Aladin OS=Mus musculus OX=10090 GN=Aaas PE=1 SV=1	4	8.4	59.43	9.5269	3	4	2	4	7	5	5850200	11177000	3143100	6598000	5450400	4983400
sp|P58802|TB10A_MOUSE	sp|P58802|TB10A_MOUSE;tr|Q5SPX8|Q5SPX8_MOUSE	>sp|P58802|TB10A_MOUSE TBC1 domain family member 10A OS=Mus musculus OX=10090 GN=Tbc1d10a PE=1 SV=1;>tr|Q5SPX8|Q5SPX8_MOUSE TBC1 domain family member 10A OS=Mus musculus OX=10090 GN=Tbc1d10a PE=1 SV=1	1	4	56.202	3.4918	0	0	1	1	1	1	0	0	138610	236870	167750	192660
sp|P58871|TB182_MOUSE	sp|P58871|TB182_MOUSE;tr|Z4YJL4|Z4YJL4_MOUSE	>sp|P58871|TB182_MOUSE 182 kDa tankyrase-1-binding protein OS=Mus musculus OX=10090 GN=Tnks1bp1 PE=1 SV=2;>tr|Z4YJL4|Z4YJL4_MOUSE 182 kDa tankyrase-1-binding protein OS=Mus musculus OX=10090 GN=Tnks1bp1 PE=1 SV=1	6	5.2	181.82	12.181	0	1	1	3	1	3	200550	212310	132610	188470	143210	230590
sp|P58929|GMEB2_MOUSE	sp|P58929|GMEB2_MOUSE	>sp|P58929|GMEB2_MOUSE Glucocorticoid modulatory element-binding protein 2 OS=Mus musculus OX=10090 GN=Gmeb2 PE=2 SV=2	4	14	56.631	7.4747	3	2	1	3	2	2	2578100	2326600	2084000	4349900	2452800	2783000
tr|S4R1H4|S4R1H4_MOUSE	tr|S4R1H4|S4R1H4_MOUSE;sp|P59016|VP33B_MOUSE;tr|S4R227|S4R227_MOUSE	>tr|S4R1H4|S4R1H4_MOUSE Vacuolar protein sorting-associated protein 33B OS=Mus musculus OX=10090 GN=Vps33b PE=1 SV=1;>sp|P59016|VP33B_MOUSE Vacuolar protein sorting-associated protein 33B OS=Mus musculus OX=10090 GN=Vps33b PE=1 SV=1;>tr|S4R227|S4R227_MOUSE	2	14.7	16.578	2.999	1	1	1	1	1	2	2719900	2079900	1650400	4023200	2805400	3696200
sp|P59017|B2L13_MOUSE	sp|P59017|B2L13_MOUSE	>sp|P59017|B2L13_MOUSE Bcl-2-like protein 13 OS=Mus musculus OX=10090 GN=Bcl2l13 PE=1 SV=2	3	9.7	46.719	7.727	1	1	0	0	0	2	1672400	1545100	755450	842120	741750	852190
sp|P59114|CAPAM_MOUSE	sp|P59114|CAPAM_MOUSE	>sp|P59114|CAPAM_MOUSE mRNA (2-O-methyladenosine-N(6)-)-methyltransferase OS=Mus musculus OX=10090 GN=Pcif1 PE=1 SV=1	3	6.4	80.504	8.4223	0	1	1	2	5	1	21122	566580	373830	456950	585710	578480
sp|P59235|NUP43_MOUSE	sp|P59235|NUP43_MOUSE	>sp|P59235|NUP43_MOUSE Nucleoporin Nup43 OS=Mus musculus OX=10090 GN=Nup43 PE=1 SV=2	5	15.3	41.989	21.484	7	3	5	5	7	5	6504900	5369100	5105300	10183000	5391300	6762600
sp|P59325|IF5_MOUSE	sp|P59325|IF5_MOUSE;tr|Q8BVV6|Q8BVV6_MOUSE;tr|A0A1Y7VNP4|A0A1Y7VNP4_MOUSE;tr|A0A1Y7VJG2|A0A1Y7VJG2_MOUSE	>sp|P59325|IF5_MOUSE Eukaryotic translation initiation factor 5 OS=Mus musculus OX=10090 GN=Eif5 PE=1 SV=1;>tr|Q8BVV6|Q8BVV6_MOUSE Eukaryotic translation initiation factor 5 OS=Mus musculus OX=10090 GN=Eif5 PE=1 SV=1;>tr|A0A1Y7VNP4|A0A1Y7VNP4_MOUSE Eukaryo	7	18.9	48.968	18.915	6	6	7	4	6	7	5621300	5485600	6030900	7591200	6251400	6945400
sp|P59708|SF3B6_MOUSE	sp|P59708|SF3B6_MOUSE;tr|A0A1W2P7L7|A0A1W2P7L7_MOUSE	>sp|P59708|SF3B6_MOUSE Splicing factor 3B subunit 6 OS=Mus musculus OX=10090 GN=Sf3b6 PE=1 SV=1;>tr|A0A1W2P7L7|A0A1W2P7L7_MOUSE Splicing factor 3B subunit 6 (Fragment) OS=Mus musculus OX=10090 GN=Sf3b6 PE=1 SV=1	3	28	14.585	9.9186	4	3	5	5	5	4	5969400	9437000	10806000	12866000	15410000	12005000
sp|P59729|RIN3_MOUSE	sp|P59729|RIN3_MOUSE;tr|D3Z076|D3Z076_MOUSE;tr|Q3UZ87|Q3UZ87_MOUSE;tr|Q3U332|Q3U332_MOUSE	>sp|P59729|RIN3_MOUSE Ras and Rab interactor 3 OS=Mus musculus OX=10090 GN=Rin3 PE=1 SV=2;>tr|D3Z076|D3Z076_MOUSE Ras and Rab interactor 3 OS=Mus musculus OX=10090 GN=Rin3 PE=1 SV=1;>tr|Q3UZ87|Q3UZ87_MOUSE Ras and Rab interactor 3 OS=Mus musculus OX=10090	2	3	107.22	5.0599	0	0	1	0	2	1	411480	287150	527160	103400	336410	327720
sp|P59999|ARPC4_MOUSE	sp|P59999|ARPC4_MOUSE	>sp|P59999|ARPC4_MOUSE Actin-related protein 2/3 complex subunit 4 OS=Mus musculus OX=10090 GN=Arpc4 PE=1 SV=3	6	31.5	19.667	64.888	15	16	14	14	14	15	62715000	93476000	73757000	64422000	72045000	70432000
sp|P60122|RUVB1_MOUSE	sp|P60122|RUVB1_MOUSE	>sp|P60122|RUVB1_MOUSE RuvB-like 1 OS=Mus musculus OX=10090 GN=Ruvbl1 PE=1 SV=1	16	47.6	50.213	105.18	27	24	28	28	28	31	35241000	32157000	26234000	42094000	29970000	36296000
sp|P60229|EIF3E_MOUSE	sp|P60229|EIF3E_MOUSE	>sp|P60229|EIF3E_MOUSE Eukaryotic translation initiation factor 3 subunit E OS=Mus musculus OX=10090 GN=Eif3e PE=1 SV=1	6	14.2	52.22	19.487	2	4	5	5	5	4	3712900	3560800	3470000	4967100	3775800	3986700
sp|P60335|PCBP1_MOUSE	sp|P60335|PCBP1_MOUSE	>sp|P60335|PCBP1_MOUSE Poly(rC)-binding protein 1 OS=Mus musculus OX=10090 GN=Pcbp1 PE=1 SV=1	8	56.5	37.497	182.23	23	27	21	19	22	29	74884000	100030000	77602000	109040000	97766000	120110000
sp|P60487|PLPP_MOUSE	sp|P60487|PLPP_MOUSE	>sp|P60487|PLPP_MOUSE Pyridoxal phosphate phosphatase OS=Mus musculus OX=10090 GN=Pdxp PE=1 SV=1	3	16.4	31.512	9.0455	3	3	4	2	1	3	684740	959870	185850	1383200	782860	973760
tr|G3UZX2|G3UZX2_MOUSE	tr|G3UZX2|G3UZX2_MOUSE;sp|P60605|UB2G2_MOUSE	>tr|G3UZX2|G3UZX2_MOUSE Ubiquitin-conjugating enzyme E2 G2 (Fragment) OS=Mus musculus OX=10090 GN=Ube2g2 PE=1 SV=1;>sp|P60605|UB2G2_MOUSE Ubiquitin-conjugating enzyme E2 G2 OS=Mus musculus OX=10090 GN=Ube2g2 PE=1 SV=1	2	43.7	7.7987	3.375	1	0	0	2	0	1	3548000	3788200	3557900	4990700	5972100	5456400
sp|P60670|NPL4_MOUSE	sp|P60670|NPL4_MOUSE	>sp|P60670|NPL4_MOUSE Nuclear protein localization protein 4 homolog OS=Mus musculus OX=10090 GN=Nploc4 PE=1 SV=3	2	3.3	68.016	3.7568	1	0	0	1	0	0	297780	0	0	44752	0	204120
sp|P60710|ACTB_MOUSE	sp|P60710|ACTB_MOUSE;sp|P63260|ACTG_MOUSE;tr|E9Q1F2|E9Q1F2_MOUSE;tr|E9Q5F4|E9Q5F4_MOUSE;tr|G3UZ07|G3UZ07_MOUSE	>sp|P60710|ACTB_MOUSE Actin, cytoplasmic 1 OS=Mus musculus OX=10090 GN=Actb PE=1 SV=1;>sp|P63260|ACTG_MOUSE Actin, cytoplasmic 2 OS=Mus musculus OX=10090 GN=Actg1 PE=1 SV=1;>tr|E9Q1F2|E9Q1F2_MOUSE Actin, cytoplasmic 1 OS=Mus musculus OX=10090 GN=Actb PE=1	17	82.4	41.736	323.31	283	304	314	364	353	400	5868200000	7351400000	6919300000	17327000000	7091300000	8751300000
sp|P60766|CDC42_MOUSE	sp|P60766|CDC42_MOUSE	>sp|P60766|CDC42_MOUSE Cell division control protein 42 homolog OS=Mus musculus OX=10090 GN=Cdc42 PE=1 SV=2	3	19.9	21.258	10.57	3	4	4	2	3	4	7641100	10759000	12640000	17144000	8592900	16133000
sp|P60824|CIRBP_MOUSE	sp|P60824|CIRBP_MOUSE;tr|D3YU80|D3YU80_MOUSE;tr|K4DI65|K4DI65_MOUSE	>sp|P60824|CIRBP_MOUSE Cold-inducible RNA-binding protein OS=Mus musculus OX=10090 GN=Cirbp PE=1 SV=1;>tr|D3YU80|D3YU80_MOUSE Cold-inducible RNA-binding protein (Fragment) OS=Mus musculus OX=10090 GN=Cirbp PE=1 SV=1;>tr|K4DI65|K4DI65_MOUSE Cold inducible R	3	20.9	18.607	7.6354	3	2	2	1	1	1	9897300	11406000	8244900	10766000	11131000	7896800
sp|P60840|ENSA_MOUSE	sp|P60840|ENSA_MOUSE	>sp|P60840|ENSA_MOUSE Alpha-endosulfine OS=Mus musculus OX=10090 GN=Ensa PE=1 SV=1	5	55.4	13.335	21.07	10	8	9	7	7	9	17201000	19496000	18799000	28788000	26398000	27853000
sp|P60843|IF4A1_MOUSE	sp|P60843|IF4A1_MOUSE	>sp|P60843|IF4A1_MOUSE Eukaryotic initiation factor 4A-I OS=Mus musculus OX=10090 GN=Eif4a1 PE=1 SV=1	13	48.5	46.153	285.8	47	49	44	42	45	43	116420000	131420000	114490000	117900000	117840000	152770000
sp|P60867|RS20_MOUSE	sp|P60867|RS20_MOUSE	>sp|P60867|RS20_MOUSE 40S ribosomal protein S20 OS=Mus musculus OX=10090 GN=Rps20 PE=1 SV=1	4	25.2	13.373	16.087	2	3	2	4	2	5	17506000	51804000	14696000	35178000	21203000	28972000
sp|P60898|RPB9_MOUSE	sp|P60898|RPB9_MOUSE;tr|D3Z3Z8|D3Z3Z8_MOUSE;tr|D3YYI3|D3YYI3_MOUSE	>sp|P60898|RPB9_MOUSE DNA-directed RNA polymerase II subunit RPB9 OS=Mus musculus OX=10090 GN=Polr2i PE=1 SV=1;>tr|D3Z3Z8|D3Z3Z8_MOUSE DNA-directed RNA polymerase II subunit RPB9 (Fragment) OS=Mus musculus OX=10090 GN=Polr2i PE=1 SV=1;>tr|D3YYI3|D3YYI3_MOU	4	44.8	14.523	31.028	3	1	3	2	3	2	16075000	1227200	15650000	5664900	16835000	8365600
tr|B0R091|B0R091_MOUSE	tr|B0R091|B0R091_MOUSE;sp|P61022|CHP1_MOUSE	>tr|B0R091|B0R091_MOUSE Calcineurin B homologous protein 1 OS=Mus musculus OX=10090 GN=Chp1 PE=1 SV=1;>sp|P61022|CHP1_MOUSE Calcineurin B homologous protein 1 OS=Mus musculus OX=10090 GN=Chp1 PE=1 SV=2	1	6.3	21.997	4.0072	0	1	0	0	0	0	0	463040	407840	563650	526000	130880
sp|P61028|RAB8B_MOUSE	sp|P61028|RAB8B_MOUSE	>sp|P61028|RAB8B_MOUSE Ras-related protein Rab-8B OS=Mus musculus OX=10090 GN=Rab8b PE=1 SV=1	1	12.1	23.603	2.8152	1	1	0	0	1	0	641450	981870	657990	625760	821970	925240
tr|A0A0G2JE32|A0A0G2JE32_MOUSE	tr|A0A0G2JE32|A0A0G2JE32_MOUSE;sp|Q6ZWY6|U2D2B_MOUSE;sp|P62838|UB2D2_MOUSE;sp|P61079|UB2D3_MOUSE;tr|A0A0G2JGL0|A0A0G2JGL0_MOUSE	>tr|A0A0G2JE32|A0A0G2JE32_MOUSE Ubiquitin-conjugating enzyme E2 D3 (Fragment) OS=Mus musculus OX=10090 GN=Ube2d3 PE=1 SV=1;>sp|Q6ZWY6|U2D2B_MOUSE Ubiquitin-conjugating enzyme E2 D2B OS=Mus musculus OX=10090 GN=Ube2d2b PE=1 SV=1;>sp|P62838|UB2D2_MOUSE Ubiqu	1	8.3	14.731	3.7039	1	1	1	1	1	1	13329000	11662000	9547200	11237000	15301000	13476000
sp|P61082|UBC12_MOUSE	sp|P61082|UBC12_MOUSE;tr|G5E919|G5E919_MOUSE;tr|F7CDT0|F7CDT0_MOUSE;tr|F6WMC0|F6WMC0_MOUSE	>sp|P61082|UBC12_MOUSE NEDD8-conjugating enzyme Ubc12 OS=Mus musculus OX=10090 GN=Ube2m PE=1 SV=1;>tr|G5E919|G5E919_MOUSE NEDD8-conjugating enzyme Ubc12 OS=Mus musculus OX=10090 GN=Ube2m PE=1 SV=1;>tr|F7CDT0|F7CDT0_MOUSE NEDD8-conjugating enzyme Ubc12 (Fra	2	10.9	20.9	6.1906	2	2	2	2	2	2	4063200	3744200	3705100	4032400	3578100	4280300
tr|A0A0J9YUI1|A0A0J9YUI1_MOUSE	tr|A0A0J9YUI1|A0A0J9YUI1_MOUSE;sp|P61087|UBE2K_MOUSE;tr|D3Z4U3|D3Z4U3_MOUSE	>tr|A0A0J9YUI1|A0A0J9YUI1_MOUSE Ubiquitin-conjugating enzyme E2 K OS=Mus musculus OX=10090 GN=Ube2k PE=1 SV=1;>sp|P61087|UBE2K_MOUSE Ubiquitin-conjugating enzyme E2 K OS=Mus musculus OX=10090 GN=Ube2k PE=1 SV=3;>tr|D3Z4U3|D3Z4U3_MOUSE Ubiquitin-conjugating	4	34.5	15.81	12.997	3	6	5	4	6	4	6271200	11411000	11894000	11922000	4939600	5778400
sp|P61089|UBE2N_MOUSE	sp|P61089|UBE2N_MOUSE	>sp|P61089|UBE2N_MOUSE Ubiquitin-conjugating enzyme E2 N OS=Mus musculus OX=10090 GN=Ube2n PE=1 SV=1	9	61.2	17.138	85.428	11	14	12	14	13	13	59890000	71530000	64316000	71031000	84736000	74581000
sp|P61161|ARP2_MOUSE	sp|P61161|ARP2_MOUSE	>sp|P61161|ARP2_MOUSE Actin-related protein 2 OS=Mus musculus OX=10090 GN=Actr2 PE=1 SV=1	10	28.7	44.76	220.11	20	24	29	27	23	30	91808000	76215000	61632000	99603000	78640000	90456000
sp|P61164|ACTZ_MOUSE	sp|P61164|ACTZ_MOUSE	>sp|P61164|ACTZ_MOUSE Alpha-centractin OS=Mus musculus OX=10090 GN=Actr1a PE=1 SV=1	2	15.2	42.613	26.117	3	5	4	4	2	7	2928400	5820700	6199000	7494000	3404800	9141500
sp|P61202|CSN2_MOUSE	sp|P61202|CSN2_MOUSE;tr|A2AQE4|A2AQE4_MOUSE	>sp|P61202|CSN2_MOUSE COP9 signalosome complex subunit 2 OS=Mus musculus OX=10090 GN=Cops2 PE=1 SV=1;>tr|A2AQE4|A2AQE4_MOUSE COP9 signalosome complex subunit 2 OS=Mus musculus OX=10090 GN=Cops2 PE=1 SV=1	6	16.7	51.596	16.269	6	9	4	9	7	6	2516300	3360800	1666100	4059500	2031500	3895900
sp|P84078|ARF1_MOUSE	sp|P84078|ARF1_MOUSE;sp|P61205|ARF3_MOUSE;sp|Q8BSL7|ARF2_MOUSE;sp|P84084|ARF5_MOUSE	>sp|P84078|ARF1_MOUSE ADP-ribosylation factor 1 OS=Mus musculus OX=10090 GN=Arf1 PE=1 SV=2;>sp|P61205|ARF3_MOUSE ADP-ribosylation factor 3 OS=Mus musculus OX=10090 GN=Arf3 PE=2 SV=2;>sp|Q8BSL7|ARF2_MOUSE ADP-ribosylation factor 2 OS=Mus musculus OX=10090 G	5	38.7	20.697	15.92	2	4	2	2	3	3	9058600	8375200	6240700	8189200	10586000	4520000
tr|A0A2U3TZ54|A0A2U3TZ54_MOUSE	tr|A0A2U3TZ54|A0A2U3TZ54_MOUSE;sp|P61219|RPAB2_MOUSE;tr|A0A2R8VHS7|A0A2R8VHS7_MOUSE	>tr|A0A2U3TZ54|A0A2U3TZ54_MOUSE DNA-directed RNA polymerases I, II, and III subunit RPABC2 OS=Mus musculus OX=10090 GN=Polr2f PE=1 SV=1;>sp|P61219|RPAB2_MOUSE DNA-directed RNA polymerases I, II, and III subunit RPABC2 OS=Mus musculus OX=10090 GN=Polr2f PE=	2	13.4	12.765	3.9287	2	1	2	0	1	1	15549000	16143000	14702000	18067000	17027000	16968000
tr|B1ARA3|B1ARA3_MOUSE	tr|B1ARA3|B1ARA3_MOUSE;tr|B1ARA5|B1ARA5_MOUSE;sp|P61255|RL26_MOUSE	>tr|B1ARA3|B1ARA3_MOUSE 60S ribosomal protein L26 (Fragment) OS=Mus musculus OX=10090 GN=Rpl26 PE=1 SV=1;>tr|B1ARA5|B1ARA5_MOUSE 60S ribosomal protein L26 OS=Mus musculus OX=10090 GN=Rpl26 PE=1 SV=1;>sp|P61255|RL26_MOUSE 60S ribosomal protein L26 OS=Mus mu	2	15.5	12.217	5.0418	3	2	1	1	3	3	7373600	7560500	7178700	2350100	3290900	2602000
sp|P61290|PSME3_MOUSE	sp|P61290|PSME3_MOUSE;tr|A2A4J1|A2A4J1_MOUSE	>sp|P61290|PSME3_MOUSE Proteasome activator complex subunit 3 OS=Mus musculus OX=10090 GN=Psme3 PE=1 SV=1;>tr|A2A4J1|A2A4J1_MOUSE Proteasome activator complex subunit 3 (Fragment) OS=Mus musculus OX=10090 GN=Psme3 PE=1 SV=1	5	24	29.506	15.804	7	3	5	5	3	6	7419100	10155000	7790900	7710200	7066300	9321400
sp|P61294|RAB6B_MOUSE	sp|P61294|RAB6B_MOUSE;tr|A0A1L1SRS6|A0A1L1SRS6_MOUSE	>sp|P61294|RAB6B_MOUSE Ras-related protein Rab-6B OS=Mus musculus OX=10090 GN=Rab6b PE=1 SV=1;>tr|A0A1L1SRS6|A0A1L1SRS6_MOUSE Ras-related protein Rab-6B OS=Mus musculus OX=10090 GN=Rab6b PE=1 SV=1	1	17.8	23.461	32.048	2	3	3	3	3	3	5957300	9696900	4782600	6916300	6522000	5227900
sp|P61327|MGN_MOUSE	sp|P61327|MGN_MOUSE;sp|Q9CQL1|MGN2_MOUSE;tr|A0A023T778|A0A023T778_MOUSE;tr|G3UZW7|G3UZW7_MOUSE	>sp|P61327|MGN_MOUSE Protein mago nashi homolog OS=Mus musculus OX=10090 GN=Magoh PE=2 SV=1;>sp|Q9CQL1|MGN2_MOUSE Protein mago nashi homolog 2 OS=Mus musculus OX=10090 GN=Magohb PE=2 SV=1;>tr|A0A023T778|A0A023T778_MOUSE Mago nashi protein OS=Mus musculus O	4	40.4	17.163	28.581	5	7	8	7	5	8	7466600	11037000	8354100	22168000	15232000	19604000
sp|P61358|RL27_MOUSE	sp|P61358|RL27_MOUSE	>sp|P61358|RL27_MOUSE 60S ribosomal protein L27 OS=Mus musculus OX=10090 GN=Rpl27 PE=1 SV=2	6	45.6	15.798	42.036	6	12	10	7	4	4	28076000	32063000	23957000	14340000	16705000	12230000
sp|P61514|RL37A_MOUSE	sp|P61514|RL37A_MOUSE	>sp|P61514|RL37A_MOUSE 60S ribosomal protein L37a OS=Mus musculus OX=10090 GN=Rpl37a PE=1 SV=2	1	19.6	10.275	4.1226	2	2	1	1	2	1	7497600	9970000	9211200	12424000	8589700	11916000
sp|P61759|PFD3_MOUSE	sp|P61759|PFD3_MOUSE;tr|Q3TIR6|Q3TIR6_MOUSE	>sp|P61759|PFD3_MOUSE Prefoldin subunit 3 OS=Mus musculus OX=10090 GN=Vbp1 PE=1 SV=2;>tr|Q3TIR6|Q3TIR6_MOUSE Prefoldin subunit 3 OS=Mus musculus OX=10090 GN=Vbp1 PE=1 SV=1	2	12.2	22.435	7.5234	2	1	2	3	3	3	2288500	2065000	2108300	2271400	2316200	2132100
sp|P61924|COPZ1_MOUSE	sp|P61924|COPZ1_MOUSE;tr|A0A2R8VJV3|A0A2R8VJV3_MOUSE;tr|Q8R3M1|Q8R3M1_MOUSE	>sp|P61924|COPZ1_MOUSE Coatomer subunit zeta-1 OS=Mus musculus OX=10090 GN=Copz1 PE=1 SV=1;>tr|A0A2R8VJV3|A0A2R8VJV3_MOUSE Coatomer subunit zeta-1 OS=Mus musculus OX=10090 GN=Copz1 PE=1 SV=1;>tr|Q8R3M1|Q8R3M1_MOUSE Coatomer subunit zeta-1 OS=Mus musculus O	5	35	20.198	32.283	3	3	4	6	5	6	21026000	33694000	24398000	50988000	24794000	36957000
tr|G3UZX6|G3UZX6_MOUSE	tr|G3UZX6|G3UZX6_MOUSE;tr|H7BWX9|H7BWX9_MOUSE;tr|D3Z794|D3Z794_MOUSE;tr|G3UZ60|G3UZ60_MOUSE;tr|G3UWI9|G3UWI9_MOUSE;sp|P61957|SUMO2_MOUSE;tr|G3UWX9|G3UWX9_MOUSE;sp|Q9Z172|SUMO3_MOUSE;tr|G3UZA7|G3UZA7_MOUSE	>tr|G3UZX6|G3UZX6_MOUSE Small ubiquitin-related modifier 3 (Fragment) OS=Mus musculus OX=10090 GN=Sumo3 PE=4 SV=1;>tr|H7BWX9|H7BWX9_MOUSE Small ubiquitin-related modifier 2 OS=Mus musculus OX=10090 GN=Sumo2 PE=1 SV=1;>tr|D3Z794|D3Z794_MOUSE Small ubiquitin	1	25.5	5.2631	18.271	4	4	5	7	4	3	446530000	651720000	450430000	747700000	813000000	798880000
tr|H7BWZ1|H7BWZ1_MOUSE	tr|H7BWZ1|H7BWZ1_MOUSE;tr|D3YW97|D3YW97_MOUSE;sp|P61961|UFM1_MOUSE	>tr|H7BWZ1|H7BWZ1_MOUSE Ubiquitin-fold modifier 1 OS=Mus musculus OX=10090 GN=Ufm1 PE=1 SV=1;>tr|D3YW97|D3YW97_MOUSE Ubiquitin-fold modifier 1 OS=Mus musculus OX=10090 GN=Ufm1 PE=1 SV=1;>sp|P61961|UFM1_MOUSE Ubiquitin-fold modifier 1 OS=Mus musculus OX=100	1	26.3	6.1421	3.0851	2	2	2	2	2	2	4209200	11499000	10555000	5549300	7296100	7509900
sp|P61963|DCAF7_MOUSE	sp|P61963|DCAF7_MOUSE	>sp|P61963|DCAF7_MOUSE DDB1- and CUL4-associated factor 7 OS=Mus musculus OX=10090 GN=Dcaf7 PE=1 SV=1	2	7.6	38.926	6.1923	3	0	4	2	4	1	1070800	2385200	1248800	1351500	1730800	1857500
sp|P61965|WDR5_MOUSE	sp|P61965|WDR5_MOUSE;tr|F6Q3W0|F6Q3W0_MOUSE	>sp|P61965|WDR5_MOUSE WD repeat-containing protein 5 OS=Mus musculus OX=10090 GN=Wdr5 PE=1 SV=1;>tr|F6Q3W0|F6Q3W0_MOUSE WD repeat-containing protein 5 (Fragment) OS=Mus musculus OX=10090 GN=Wdr5 PE=1 SV=1	4	15.9	36.588	11.837	6	5	4	4	5	4	3866900	4677900	2852700	4620400	3968100	4519200
sp|P61967|AP1S1_MOUSE	sp|P61967|AP1S1_MOUSE	>sp|P61967|AP1S1_MOUSE AP-1 complex subunit sigma-1A OS=Mus musculus OX=10090 GN=Ap1s1 PE=1 SV=1	1	10.1	18.733	3.3531	1	1	2	1	2	0	1273800	751280	886680	1172000	2635200	1960800
sp|P61971|NTF2_MOUSE	sp|P61971|NTF2_MOUSE	>sp|P61971|NTF2_MOUSE Nuclear transport factor 2 OS=Mus musculus OX=10090 GN=Nutf2 PE=1 SV=1	2	18.9	14.478	5.3323	1	3	1	3	2	3	13137000	16430000	12071000	21267000	11828000	16250000
sp|P61979|HNRPK_MOUSE	sp|P61979|HNRPK_MOUSE;tr|H3BLL4|H3BLL4_MOUSE;tr|A0A286YDM3|A0A286YDM3_MOUSE;tr|H3BK96|H3BK96_MOUSE	>sp|P61979|HNRPK_MOUSE Heterogeneous nuclear ribonucleoprotein K OS=Mus musculus OX=10090 GN=Hnrnpk PE=1 SV=1;>tr|H3BLL4|H3BLL4_MOUSE Heterogeneous nuclear ribonucleoprotein K OS=Mus musculus OX=10090 GN=Hnrnpk PE=1 SV=1;>tr|A0A286YDM3|A0A286YDM3_MOUSE Het	1	51.8	50.976	-2	0	0	0	1	0	0	0	0	0	503190	0	257510
sp|P61982|1433G_MOUSE	sp|P61982|1433G_MOUSE	>sp|P61982|1433G_MOUSE 14-3-3 protein gamma OS=Mus musculus OX=10090 GN=Ywhag PE=1 SV=2	6	45.7	28.302	123.48	10	7	8	13	9	8	47157000	51009000	48808000	62041000	64343000	64250000
tr|A0A2I3BQ16|A0A2I3BQ16_MOUSE	tr|A0A2I3BQ16|A0A2I3BQ16_MOUSE;sp|P62046|LRCH1_MOUSE	>tr|A0A2I3BQ16|A0A2I3BQ16_MOUSE Leucine-rich repeat and calponin homology domain-containing protein 1 OS=Mus musculus OX=10090 GN=Lrch1 PE=1 SV=1;>sp|P62046|LRCH1_MOUSE Leucine-rich repeat and calponin homology domain-containing protein 1 OS=Mus musculus O	2	4.1	76.058	5.6946	3	1	1	0	1	1	286190	213290	162090	0	124140	0
sp|P62073|TIM10_MOUSE	sp|P62073|TIM10_MOUSE	>sp|P62073|TIM10_MOUSE Mitochondrial import inner membrane translocase subunit Tim10 OS=Mus musculus OX=10090 GN=Timm10 PE=1 SV=1	1	16.7	10.333	4.0184	2	1	1	1	2	3	1948600	2986100	3258500	3059400	2962300	4904300
sp|P62075|TIM13_MOUSE	sp|P62075|TIM13_MOUSE;tr|A0A1W2P756|A0A1W2P756_MOUSE;tr|A0A1W2P7H2|A0A1W2P7H2_MOUSE	>sp|P62075|TIM13_MOUSE Mitochondrial import inner membrane translocase subunit Tim13 OS=Mus musculus OX=10090 GN=Timm13 PE=1 SV=1;>tr|A0A1W2P756|A0A1W2P756_MOUSE Mitochondrial import inner membrane translocase subunit Tim13 OS=Mus musculus OX=10090 GN=Timm	4	53.7	10.458	61.605	6	4	4	7	8	6	48388000	18146000	16322000	68158000	41727000	32989000
sp|P62077|TIM8B_MOUSE	sp|P62077|TIM8B_MOUSE	>sp|P62077|TIM8B_MOUSE Mitochondrial import inner membrane translocase subunit Tim8 B OS=Mus musculus OX=10090 GN=Timm8b PE=1 SV=1	1	15.7	9.2864	7.3408	1	1	1	1	1	1	1795500	2902800	2047700	3861700	2378800	2947900
sp|P62082|RS7_MOUSE	sp|P62082|RS7_MOUSE;tr|F6SVV1|F6SVV1_MOUSE	>sp|P62082|RS7_MOUSE 40S ribosomal protein S7 OS=Mus musculus OX=10090 GN=Rps7 PE=2 SV=1;>tr|F6SVV1|F6SVV1_MOUSE 40S ribosomal protein S7 OS=Mus musculus OX=10090 GN=Gm9493 PE=3 SV=1	8	36.6	22.127	18.085	3	6	7	4	6	3	15348000	20780000	27949000	12172000	12399000	10368000
sp|P62137|PP1A_MOUSE	sp|P62137|PP1A_MOUSE	>sp|P62137|PP1A_MOUSE Serine/threonine-protein phosphatase PP1-alpha catalytic subunit OS=Mus musculus OX=10090 GN=Ppp1ca PE=1 SV=1	6	43.3	37.54	111.82	8	15	14	11	13	20	15196000	24203000	20942000	28843000	23364000	27283000
sp|P62141|PP1B_MOUSE	sp|P62141|PP1B_MOUSE	>sp|P62141|PP1B_MOUSE Serine/threonine-protein phosphatase PP1-beta catalytic subunit OS=Mus musculus OX=10090 GN=Ppp1cb PE=1 SV=3	3	37.9	37.186	35.817	3	4	3	5	3	4	6902100	6981200	7487800	8616800	7928100	8143900
sp|P62192|PRS4_MOUSE	sp|P62192|PRS4_MOUSE	>sp|P62192|PRS4_MOUSE 26S proteasome regulatory subunit 4 OS=Mus musculus OX=10090 GN=Psmc1 PE=1 SV=1	8	21.4	49.184	37.181	2	3	6	7	3	3	2742400	2467100	3992600	5815400	2756800	3347400
sp|P62196|PRS8_MOUSE	sp|P62196|PRS8_MOUSE;tr|Q8K1K2|Q8K1K2_MOUSE	>sp|P62196|PRS8_MOUSE 26S proteasome regulatory subunit 8 OS=Mus musculus OX=10090 GN=Psmc5 PE=1 SV=1;>tr|Q8K1K2|Q8K1K2_MOUSE 26S proteasome regulatory subunit 8 OS=Mus musculus OX=10090 GN=Psmc5 PE=1 SV=1	11	33.3	45.626	64.241	14	16	13	15	15	15	6783900	9647300	5722500	10529000	8697600	9329100
sp|P62242|RS8_MOUSE	sp|P62242|RS8_MOUSE	>sp|P62242|RS8_MOUSE 40S ribosomal protein S8 OS=Mus musculus OX=10090 GN=Rps8 PE=1 SV=2	5	28.4	24.205	45.275	9	9	8	10	8	5	10020000	13114000	19735000	13510000	8900200	6543100
tr|F8WJ41|F8WJ41_MOUSE	tr|F8WJ41|F8WJ41_MOUSE;sp|P62245|RS15A_MOUSE	>tr|F8WJ41|F8WJ41_MOUSE 40S ribosomal protein S15a (Fragment) OS=Mus musculus OX=10090 GN=Rps15a PE=1 SV=1;>sp|P62245|RS15A_MOUSE 40S ribosomal protein S15a OS=Mus musculus OX=10090 GN=Rps15a PE=1 SV=2	3	25.9	12.31	7.9559	1	4	3	0	0	0	2747100	3581900	3929000	0	1752700	2068800
sp|P62254|UB2G1_MOUSE	sp|P62254|UB2G1_MOUSE	>sp|P62254|UB2G1_MOUSE Ubiquitin-conjugating enzyme E2 G1 OS=Mus musculus OX=10090 GN=Ube2g1 PE=1 SV=3	1	5.9	19.509	4.6371	2	2	2	1	2	2	1613200	1562500	1446800	930480	1633200	2108800
sp|P62257|UBE2H_MOUSE	sp|P62257|UBE2H_MOUSE;tr|E9Q3U1|E9Q3U1_MOUSE	>sp|P62257|UBE2H_MOUSE Ubiquitin-conjugating enzyme E2 H OS=Mus musculus OX=10090 GN=Ube2h PE=1 SV=1;>tr|E9Q3U1|E9Q3U1_MOUSE Ubiquitin-conjugating enzyme E2 H OS=Mus musculus OX=10090 GN=Ube2h PE=1 SV=1	3	18.6	20.655	5.3734	0	0	0	1	1	2	507580	149000	701770	1054600	692980	974820
sp|P62259|1433E_MOUSE	sp|P62259|1433E_MOUSE;tr|D6REF3|D6REF3_MOUSE	>sp|P62259|1433E_MOUSE 14-3-3 protein epsilon OS=Mus musculus OX=10090 GN=Ywhae PE=1 SV=1;>tr|D6REF3|D6REF3_MOUSE 14-3-3 protein epsilon OS=Mus musculus OX=10090 GN=Ywhae PE=1 SV=1	17	68.2	29.174	173.95	33	35	28	30	35	31	113480000	120160000	105330000	142780000	137070000	147330000
sp|P62264|RS14_MOUSE	sp|P62264|RS14_MOUSE;tr|D3YVF4|D3YVF4_MOUSE;tr|D3Z7I1|D3Z7I1_MOUSE	>sp|P62264|RS14_MOUSE 40S ribosomal protein S14 OS=Mus musculus OX=10090 GN=Rps14 PE=1 SV=3;>tr|D3YVF4|D3YVF4_MOUSE 40S ribosomal protein S14 (Fragment) OS=Mus musculus OX=10090 GN=Rps14 PE=1 SV=1;>tr|D3Z7I1|D3Z7I1_MOUSE 40S ribosomal protein S14 (Fragment	6	39.7	16.273	28.169	4	3	2	4	5	5	19067000	9656800	33950000	21621000	19689000	20245000
sp|P62267|RS23_MOUSE	sp|P62267|RS23_MOUSE	>sp|P62267|RS23_MOUSE 40S ribosomal protein S23 OS=Mus musculus OX=10090 GN=Rps23 PE=1 SV=3	2	15.4	15.807	5.5873	1	2	1	2	1	2	2503100	13850000	2916000	1801800	2108400	2218200
tr|S4R1N6|S4R1N6_MOUSE	tr|S4R1N6|S4R1N6_MOUSE;tr|F6YVP7|F6YVP7_MOUSE;tr|A0A1Y7VKY1|A0A1Y7VKY1_MOUSE;sp|P62270|RS18_MOUSE	>tr|S4R1N6|S4R1N6_MOUSE 40S ribosomal protein S18 OS=Mus musculus OX=10090 GN=Rps18 PE=3 SV=1;>tr|F6YVP7|F6YVP7_MOUSE Predicted gene 10260 OS=Mus musculus OX=10090 GN=Gm10260 PE=3 SV=2;>tr|A0A1Y7VKY1|A0A1Y7VKY1_MOUSE MCG116671 OS=Mus musculus OX=10090 GN=G	6	43.9	12.483	37.121	7	8	7	6	5	9	30930000	20559000	12282000	17165000	14923000	19847000
tr|A0A1B0GRR3|A0A1B0GRR3_MOUSE	tr|A0A1B0GRR3|A0A1B0GRR3_MOUSE;sp|P62281|RS11_MOUSE;tr|A0A1B0GSE8|A0A1B0GSE8_MOUSE	>tr|A0A1B0GRR3|A0A1B0GRR3_MOUSE 40S ribosomal protein S11 OS=Mus musculus OX=10090 GN=Rps11 PE=1 SV=1;>sp|P62281|RS11_MOUSE 40S ribosomal protein S11 OS=Mus musculus OX=10090 GN=Rps11 PE=1 SV=3;>tr|A0A1B0GSE8|A0A1B0GSE8_MOUSE 40S ribosomal protein S11 (Fra	3	14.6	15.198	6.2463	2	3	3	2	2	2	4036300	5233000	4715600	3288900	3148000	2881800
tr|Q921R2|Q921R2_MOUSE	tr|Q921R2|Q921R2_MOUSE;sp|P62301|RS13_MOUSE;tr|A0A0U1RQ71|A0A0U1RQ71_MOUSE	>tr|Q921R2|Q921R2_MOUSE 40S ribosomal protein S13 OS=Mus musculus OX=10090 GN=Rps13 PE=1 SV=1;>sp|P62301|RS13_MOUSE 40S ribosomal protein S13 OS=Mus musculus OX=10090 GN=Rps13 PE=1 SV=2;>tr|A0A0U1RQ71|A0A0U1RQ71_MOUSE 40S ribosomal protein S13 OS=Mus muscu	5	30.7	16.142	18.41	3	5	6	1	4	2	15032000	16504000	14601000	4022600	5940400	5426700
sp|P62305|RUXE_MOUSE	sp|P62305|RUXE_MOUSE	>sp|P62305|RUXE_MOUSE Small nuclear ribonucleoprotein E OS=Mus musculus OX=10090 GN=Snrpe PE=1 SV=1	3	29.3	10.803	16.148	7	6	9	4	7	6	29531000	27674000	38895000	41419000	25193000	34552000
sp|P62307|RUXF_MOUSE	sp|P62307|RUXF_MOUSE	>sp|P62307|RUXF_MOUSE Small nuclear ribonucleoprotein F OS=Mus musculus OX=10090 GN=Snrpf PE=1 SV=1	4	41.9	9.7251	30.436	2	3	3	3	2	6	36660000	74135000	63265000	57195000	55509000	71269000
sp|P62309|RUXG_MOUSE	sp|P62309|RUXG_MOUSE	>sp|P62309|RUXG_MOUSE Small nuclear ribonucleoprotein G OS=Mus musculus OX=10090 GN=Snrpg PE=1 SV=1	2	17.1	8.496	10.431	4	4	3	2	4	2	34877000	32399000	20830000	41720000	34761000	44657000
sp|P62311|LSM3_MOUSE	sp|P62311|LSM3_MOUSE	>sp|P62311|LSM3_MOUSE U6 snRNA-associated Sm-like protein LSm3 OS=Mus musculus OX=10090 GN=Lsm3 PE=1 SV=2	3	40.2	11.845	95.993	6	11	7	6	9	7	97862000	128640000	108930000	124120000	148750000	168430000
sp|P62313|LSM6_MOUSE	sp|P62313|LSM6_MOUSE	>sp|P62313|LSM6_MOUSE U6 snRNA-associated Sm-like protein LSm6 OS=Mus musculus OX=10090 GN=Lsm6 PE=1 SV=1	4	37.5	9.1275	9.8818	4	2	1	3	3	1	20633000	9847400	13278000	19896000	18565000	12597000
sp|P62315|SMD1_MOUSE	sp|P62315|SMD1_MOUSE	>sp|P62315|SMD1_MOUSE Small nuclear ribonucleoprotein Sm D1 OS=Mus musculus OX=10090 GN=Snrpd1 PE=1 SV=1	1	10.9	13.281	8.0526	1	1	1	1	1	0	3281500	4752100	4070000	5114600	1803200	3121000
sp|P62317|SMD2_MOUSE	sp|P62317|SMD2_MOUSE	>sp|P62317|SMD2_MOUSE Small nuclear ribonucleoprotein Sm D2 OS=Mus musculus OX=10090 GN=Snrpd2 PE=1 SV=1	5	40.7	13.527	96.581	7	5	10	12	12	8	31535000	38266000	38110000	49568000	37881000	39746000
sp|P62320|SMD3_MOUSE	sp|P62320|SMD3_MOUSE	>sp|P62320|SMD3_MOUSE Small nuclear ribonucleoprotein Sm D3 OS=Mus musculus OX=10090 GN=Snrpd3 PE=1 SV=1	3	31.7	13.916	27.136	2	2	3	4	4	4	15260000	18298000	13968000	20138000	14546000	17503000
tr|A0A0N4SVK3|A0A0N4SVK3_MOUSE	tr|A0A0N4SVK3|A0A0N4SVK3_MOUSE;sp|P62322|LSM5_MOUSE	>tr|A0A0N4SVK3|A0A0N4SVK3_MOUSE U6 snRNA-associated Sm-like protein LSm5 OS=Mus musculus OX=10090 GN=Lsm5 PE=1 SV=1;>sp|P62322|LSM5_MOUSE U6 snRNA-associated Sm-like protein LSm5 OS=Mus musculus OX=10090 GN=Lsm5 PE=3 SV=2	1	32.2	6.6106	6.9473	0	1	0	2	2	2	0	157290000	0	237690000	198690000	240180000
sp|P62334|PRS10_MOUSE	sp|P62334|PRS10_MOUSE	>sp|P62334|PRS10_MOUSE 26S proteasome regulatory subunit 10B OS=Mus musculus OX=10090 GN=Psmc6 PE=1 SV=1	11	41.4	44.172	75.643	12	17	17	14	19	21	11011000	16041000	15300000	22020000	15175000	18714000
sp|P62488|RPB7_MOUSE	sp|P62488|RPB7_MOUSE	>sp|P62488|RPB7_MOUSE DNA-directed RNA polymerase II subunit RPB7 OS=Mus musculus OX=10090 GN=Polr2g PE=1 SV=1	1	8.7	19.294	4.1983	0	1	2	0	0	1	0	992850	1176200	0	0	1279700
sp|P62627|DLRB1_MOUSE	sp|P62627|DLRB1_MOUSE;tr|A2AVR9|A2AVR9_MOUSE	>sp|P62627|DLRB1_MOUSE Dynein light chain roadblock-type 1 OS=Mus musculus OX=10090 GN=Dynlrb1 PE=1 SV=3;>tr|A2AVR9|A2AVR9_MOUSE Dynein light chain roadblock OS=Mus musculus OX=10090 GN=Dynlrb1 PE=1 SV=1	3	43.8	10.99	25.604	2	3	2	4	3	5	22583000	30797000	18957000	28522000	29107000	33421000
sp|P62702|RS4X_MOUSE	sp|P62702|RS4X_MOUSE;tr|V9GWY0|V9GWY0_MOUSE	>sp|P62702|RS4X_MOUSE 40S ribosomal protein S4, X isoform OS=Mus musculus OX=10090 GN=Rps4x PE=1 SV=2;>tr|V9GWY0|V9GWY0_MOUSE 40S ribosomal protein S4 OS=Mus musculus OX=10090 GN=Gm15013 PE=3 SV=1	6	24.3	29.597	18.624	7	11	10	7	6	4	8714200	10294000	8971500	7786900	6186200	19891000
sp|P63330|PP2AA_MOUSE	sp|P63330|PP2AA_MOUSE;sp|P62715|PP2AB_MOUSE	>sp|P63330|PP2AA_MOUSE Serine/threonine-protein phosphatase 2A catalytic subunit alpha isoform OS=Mus musculus OX=10090 GN=Ppp2ca PE=1 SV=1;>sp|P62715|PP2AB_MOUSE Serine/threonine-protein phosphatase 2A catalytic subunit beta isoform OS=Mus musculus OX=100	7	28.2	35.608	74.838	6	8	7	8	7	14	9448400	10756000	8931300	18030000	10122000	15106000
sp|P62743|AP2S1_MOUSE	sp|P62743|AP2S1_MOUSE;tr|A0A0U1RPS0|A0A0U1RPS0_MOUSE;tr|A0A0U1RQ06|A0A0U1RQ06_MOUSE	>sp|P62743|AP2S1_MOUSE AP-2 complex subunit sigma OS=Mus musculus OX=10090 GN=Ap2s1 PE=1 SV=1;>tr|A0A0U1RPS0|A0A0U1RPS0_MOUSE AP-2 complex subunit sigma OS=Mus musculus OX=10090 GN=Ap2s1 PE=1 SV=1;>tr|A0A0U1RQ06|A0A0U1RQ06_MOUSE AP-2 complex subunit sigma	2	15.5	17.018	4.1346	0	0	1	1	0	1	2110300	2420400	3008200	3141300	1825600	2074000
sp|P62748|HPCL1_MOUSE	sp|P62748|HPCL1_MOUSE;tr|A0A1Y7VMK3|A0A1Y7VMK3_MOUSE	>sp|P62748|HPCL1_MOUSE Hippocalcin-like protein 1 OS=Mus musculus OX=10090 GN=Hpcal1 PE=1 SV=2;>tr|A0A1Y7VMK3|A0A1Y7VMK3_MOUSE Hippocalcin-like protein 1 (Fragment) OS=Mus musculus OX=10090 GN=Hpcal1 PE=1 SV=1	3	15.5	22.338	7.8845	1	2	0	1	0	1	600040	610660	489560	919210	752690	613830
sp|P62751|RL23A_MOUSE	sp|P62751|RL23A_MOUSE;tr|D3YTY6|D3YTY6_MOUSE	>sp|P62751|RL23A_MOUSE 60S ribosomal protein L23a OS=Mus musculus OX=10090 GN=Rpl23a PE=1 SV=1;>tr|D3YTY6|D3YTY6_MOUSE Predicted gene 6096 OS=Mus musculus OX=10090 GN=Gm6096 PE=1 SV=1	4	21.2	17.695	11.726	2	4	4	2	2	2	16534000	23990000	27065000	13685000	11861000	11608000
sp|P62754|RS6_MOUSE	sp|P62754|RS6_MOUSE	>sp|P62754|RS6_MOUSE 40S ribosomal protein S6 OS=Mus musculus OX=10090 GN=Rps6 PE=1 SV=1	6	25.3	28.68	26.72	3	3	2	1	1	2	6637800	15267000	12853000	3900700	3521600	1967900
sp|P62774|MTPN_MOUSE	sp|P62774|MTPN_MOUSE	>sp|P62774|MTPN_MOUSE Myotrophin OS=Mus musculus OX=10090 GN=Mtpn PE=1 SV=2	5	41.5	12.861	78.132	8	11	11	9	13	12	62315000	74625000	68728000	116330000	69161000	76796000
sp|P62806|H4_MOUSE	sp|P62806|H4_MOUSE	>sp|P62806|H4_MOUSE Histone H4 OS=Mus musculus OX=10090 GN=Hist1h4a PE=1 SV=2	11	49.5	11.367	323.31	102	107	95	87	101	98	2425600000	2869900000	2881100000	3004800000	2704100000	2432100000
sp|P62814|VATB2_MOUSE	sp|P62814|VATB2_MOUSE	>sp|P62814|VATB2_MOUSE V-type proton ATPase subunit B, brain isoform OS=Mus musculus OX=10090 GN=Atp6v1b2 PE=1 SV=1	5	11	56.55	16.527	4	4	4	5	4	5	1656400	2970200	2223600	4264100	2652100	3426100
sp|P62827|RAN_MOUSE	sp|P62827|RAN_MOUSE;tr|Q14AA6|Q14AA6_MOUSE	>sp|P62827|RAN_MOUSE GTP-binding nuclear protein Ran OS=Mus musculus OX=10090 GN=Ran PE=1 SV=3;>tr|Q14AA6|Q14AA6_MOUSE GTP-binding nuclear protein Ran OS=Mus musculus OX=10090 GN=1700009N14Rik PE=2 SV=1	9	38	24.423	161.57	15	11	11	12	14	15	128530000	193730000	123560000	147430000	122990000	143330000
sp|P62830|RL23_MOUSE	sp|P62830|RL23_MOUSE	>sp|P62830|RL23_MOUSE 60S ribosomal protein L23 OS=Mus musculus OX=10090 GN=Rpl23 PE=1 SV=1	3	27.1	14.865	10.214	0	1	2	1	0	1	2116300	3652200	3537500	0	420650	435480
tr|D3YTQ9|D3YTQ9_MOUSE	tr|D3YTQ9|D3YTQ9_MOUSE;sp|P62843|RS15_MOUSE	>tr|D3YTQ9|D3YTQ9_MOUSE 40S ribosomal protein S15 OS=Mus musculus OX=10090 GN=Rps15 PE=1 SV=1;>sp|P62843|RS15_MOUSE 40S ribosomal protein S15 OS=Mus musculus OX=10090 GN=Rps15 PE=1 SV=2	2	11	13.742	6.0294	3	4	2	3	4	3	5154000	7303600	7881400	5803500	7574600	5550400
sp|P62849|RS24_MOUSE	sp|P62849|RS24_MOUSE;tr|A0A286YEB7|A0A286YEB7_MOUSE	>sp|P62849|RS24_MOUSE 40S ribosomal protein S24 OS=Mus musculus OX=10090 GN=Rps24 PE=1 SV=1;>tr|A0A286YEB7|A0A286YEB7_MOUSE 40S ribosomal protein S24 OS=Mus musculus OX=10090 GN=Rps24 PE=1 SV=1	4	26.3	15.423	10.133	4	6	4	3	2	3	14026000	26336000	14586000	15097000	12380000	10038000
tr|A0A1L1SQA8|A0A1L1SQA8_MOUSE	tr|A0A1L1SQA8|A0A1L1SQA8_MOUSE;sp|P62852|RS25_MOUSE	>tr|A0A1L1SQA8|A0A1L1SQA8_MOUSE 40S ribosomal protein S25 OS=Mus musculus OX=10090 GN=Rps25 PE=1 SV=1;>sp|P62852|RS25_MOUSE 40S ribosomal protein S25 OS=Mus musculus OX=10090 GN=Rps25 PE=1 SV=1	2	20.4	10.309	7.0587	2	0	3	0	1	1	9004700	14214000	13127000	8978700	4376300	6600600
sp|P62855|RS26_MOUSE	sp|P62855|RS26_MOUSE	>sp|P62855|RS26_MOUSE 40S ribosomal protein S26 OS=Mus musculus OX=10090 GN=Rps26 PE=1 SV=3	2	20.9	13.015	6.077	3	2	3	2	3	3	18963000	24075000	24050000	15975000	18740000	19017000
tr|G3UYV7|G3UYV7_MOUSE	tr|G3UYV7|G3UYV7_MOUSE;sp|P62858|RS28_MOUSE	>tr|G3UYV7|G3UYV7_MOUSE 40S ribosomal protein S28 (Fragment) OS=Mus musculus OX=10090 GN=Rps28 PE=1 SV=1;>sp|P62858|RS28_MOUSE 40S ribosomal protein S28 OS=Mus musculus OX=10090 GN=Rps28 PE=1 SV=1	4	50	6.3442	116.34	8	9	7	8	12	8	185940000	216720000	177910000	189200000	194510000	232050000
sp|P62862|RS30_MOUSE	sp|P62862|RS30_MOUSE;tr|Q642K5|Q642K5_MOUSE	>sp|P62862|RS30_MOUSE 40S ribosomal protein S30 OS=Mus musculus OX=10090 GN=Fau PE=1 SV=1;>tr|Q642K5|Q642K5_MOUSE 40S ribosomal protein S30 OS=Mus musculus OX=10090 GN=Fau PE=1 SV=1	3	20.3	6.6478	7.3459	3	3	5	5	3	3	23655000	9505600	22106000	28654000	20636000	20636000
sp|P62869|ELOB_MOUSE	sp|P62869|ELOB_MOUSE;tr|A0A3B2WBM3|A0A3B2WBM3_MOUSE	>sp|P62869|ELOB_MOUSE Elongin-B OS=Mus musculus OX=10090 GN=Elob PE=1 SV=1;>tr|A0A3B2WBM3|A0A3B2WBM3_MOUSE Elongin-B OS=Mus musculus OX=10090 GN=Elob PE=1 SV=1	7	53.4	13.17	37.512	8	8	8	8	5	7	18042000	23033000	18932000	24896000	16373000	18943000
sp|P62874|GBB1_MOUSE	sp|P62874|GBB1_MOUSE;tr|H3BKR2|H3BKR2_MOUSE;tr|H3BLF7|H3BLF7_MOUSE	>sp|P62874|GBB1_MOUSE Guanine nucleotide-binding protein G(I)/G(S)/G(T) subunit beta-1 OS=Mus musculus OX=10090 GN=Gnb1 PE=1 SV=3;>tr|H3BKR2|H3BKR2_MOUSE Guanine nucleotide-binding protein G(I)/G(S)/G(T) subunit beta-1 (Fragment) OS=Mus musculus OX=10090 G	4	23.2	37.377	57.726	6	5	4	4	4	4	5105700	6126100	5141300	9490700	6480900	10036000
tr|A0A2R8W6R3|A0A2R8W6R3_MOUSE	tr|A0A2R8W6R3|A0A2R8W6R3_MOUSE;sp|P62878|RBX1_MOUSE	>tr|A0A2R8W6R3|A0A2R8W6R3_MOUSE E3 ubiquitin-protein ligase RBX1 OS=Mus musculus OX=10090 GN=Rbx1 PE=1 SV=1;>sp|P62878|RBX1_MOUSE E3 ubiquitin-protein ligase RBX1 OS=Mus musculus OX=10090 GN=Rbx1 PE=1 SV=1	2	22.9	9.1173	9.8734	0	0	0	0	1	0	1262800	0	11753000	13305000	10946000	13168000
sp|P62880|GBB2_MOUSE	sp|P62880|GBB2_MOUSE;tr|D3Z1M1|D3Z1M1_MOUSE;tr|D3Z1T4|D3Z1T4_MOUSE;tr|E9QKR0|E9QKR0_MOUSE;tr|D3YZX3|D3YZX3_MOUSE;sp|P29387|GBB4_MOUSE	>sp|P62880|GBB2_MOUSE Guanine nucleotide-binding protein G(I)/G(S)/G(T) subunit beta-2 OS=Mus musculus OX=10090 GN=Gnb2 PE=1 SV=3;>tr|D3Z1M1|D3Z1M1_MOUSE Guanine nucleotide-binding protein G(I)/G(S)/G(T) subunit beta-2 (Fragment) OS=Mus musculus OX=10090 G	6	27.1	37.331	201.38	6	9	7	12	7	10	15076000	19834000	18650000	33135000	19239000	29066000
tr|A0A2I3BQF4|A0A2I3BQF4_MOUSE	tr|A0A2I3BQF4|A0A2I3BQF4_MOUSE;sp|P62889|RL30_MOUSE	>tr|A0A2I3BQF4|A0A2I3BQF4_MOUSE 60S ribosomal protein L30 OS=Mus musculus OX=10090 GN=Rpl30 PE=1 SV=1;>sp|P62889|RL30_MOUSE 60S ribosomal protein L30 OS=Mus musculus OX=10090 GN=Rpl30 PE=1 SV=2	3	42.6	10.457	11.261	2	3	3	3	4	3	9718700	15161000	8885700	12136000	7947800	12660000
sp|P62892|RL39_MOUSE	sp|P62892|RL39_MOUSE	>sp|P62892|RL39_MOUSE 60S ribosomal protein L39 OS=Mus musculus OX=10090 GN=Rpl39 PE=1 SV=2	1	19.6	6.4066	3.6908	4	1	2	1	1	1	46245000	41373000	52546000	36044000	31900000	41228000
sp|P62897|CYC_MOUSE	sp|P62897|CYC_MOUSE	>sp|P62897|CYC_MOUSE Cytochrome c, somatic OS=Mus musculus OX=10090 GN=Cycs PE=1 SV=2	9	59	11.605	52.092	6	11	7	10	14	11	97767000	108950000	96940000	72466000	88561000	76016000
sp|P62908|RS3_MOUSE	sp|P62908|RS3_MOUSE;tr|A0A140LI77|A0A140LI77_MOUSE;tr|D3YV43|D3YV43_MOUSE	>sp|P62908|RS3_MOUSE 40S ribosomal protein S3 OS=Mus musculus OX=10090 GN=Rps3 PE=1 SV=1;>tr|A0A140LI77|A0A140LI77_MOUSE 40S ribosomal protein S3 OS=Mus musculus OX=10090 GN=Rps3 PE=1 SV=1;>tr|D3YV43|D3YV43_MOUSE 40S ribosomal protein S3 OS=Mus musculus OX	11	46.9	26.674	40.765	13	17	13	10	19	10	23890000	32915000	27524000	18590000	18992000	30681000
sp|P62911|RL32_MOUSE	sp|P62911|RL32_MOUSE	>sp|P62911|RL32_MOUSE 60S ribosomal protein L32 OS=Mus musculus OX=10090 GN=Rpl32 PE=1 SV=2	4	26.7	15.86	9.9835	2	1	2	2	2	0	7739600	8255400	4234400	2789300	2117500	6990000
sp|P62915|TF2B_MOUSE	sp|P62915|TF2B_MOUSE	>sp|P62915|TF2B_MOUSE Transcription initiation factor IIB OS=Mus musculus OX=10090 GN=Gtf2b PE=1 SV=1	5	21.5	34.819	14.066	1	1	3	3	2	3	1207900	1160200	1227900	3127700	1045700	1366800
sp|P62918|RL8_MOUSE	sp|P62918|RL8_MOUSE	>sp|P62918|RL8_MOUSE 60S ribosomal protein L8 OS=Mus musculus OX=10090 GN=Rpl8 PE=1 SV=2	3	15.2	28.024	7.656	2	2	4	1	1	0	8229800	7754800	16139000	3707900	3072200	3635800
sp|P62960|YBOX1_MOUSE	sp|P62960|YBOX1_MOUSE;tr|A2BGG7|A2BGG7_MOUSE	>sp|P62960|YBOX1_MOUSE Nuclease-sensitive element-binding protein 1 OS=Mus musculus OX=10090 GN=Ybx1 PE=1 SV=3;>tr|A2BGG7|A2BGG7_MOUSE Nuclease-sensitive element-binding protein 1 (Fragment) OS=Mus musculus OX=10090 GN=Ybx1 PE=1 SV=1	11	66.1	35.73	111.7	18	16	11	17	17	15	51275000	64317000	64260000	91293000	68977000	75422000
tr|F8WJG3|F8WJG3_MOUSE	tr|F8WJG3|F8WJG3_MOUSE;sp|P62996|TRA2B_MOUSE	>tr|F8WJG3|F8WJG3_MOUSE Transformer-2 protein homolog beta OS=Mus musculus OX=10090 GN=Tra2b PE=1 SV=1;>sp|P62996|TRA2B_MOUSE Transformer-2 protein homolog beta OS=Mus musculus OX=10090 GN=Tra2b PE=1 SV=1	7	37.2	21.935	91.271	11	12	16	14	15	8	77829000	82936000	96831000	101500000	127540000	93633000
sp|P63001|RAC1_MOUSE	sp|P63001|RAC1_MOUSE;tr|Q3TLP8|Q3TLP8_MOUSE	>sp|P63001|RAC1_MOUSE Ras-related C3 botulinum toxin substrate 1 OS=Mus musculus OX=10090 GN=Rac1 PE=1 SV=1;>tr|Q3TLP8|Q3TLP8_MOUSE RAS-related C3 botulinum substrate 1, isoform CRA_a OS=Mus musculus OX=10090 GN=Rac1 PE=1 SV=1	3	30.7	21.45	9.826	4	3	3	4	3	3	6055600	7221600	4358100	7645200	8597600	9023700
sp|P63005|LIS1_MOUSE	sp|P63005|LIS1_MOUSE;tr|Q5SW16|Q5SW16_MOUSE	>sp|P63005|LIS1_MOUSE Platelet-activating factor acetylhydrolase IB subunit alpha OS=Mus musculus OX=10090 GN=Pafah1b1 PE=1 SV=2;>tr|Q5SW16|Q5SW16_MOUSE Platelet-activating factor acetylhydrolase IB subunit alpha (Fragment) OS=Mus musculus OX=10090 GN=Pafa	5	16.6	46.67	19.444	2	2	3	5	4	4	7601300	5957900	5848700	7505800	6219100	7902800
sp|P63017|HSP7C_MOUSE	sp|P63017|HSP7C_MOUSE;tr|Q504P4|Q504P4_MOUSE	>sp|P63017|HSP7C_MOUSE Heat shock cognate 71 kDa protein OS=Mus musculus OX=10090 GN=Hspa8 PE=1 SV=1;>tr|Q504P4|Q504P4_MOUSE Heat shock cognate 71 kDa protein OS=Mus musculus OX=10090 GN=Hspa8 PE=1 SV=1	35	58.4	70.87	323.31	147	150	148	153	153	155	497090000	551370000	497260000	713030000	597490000	572690000
sp|P63024|VAMP3_MOUSE	sp|P63024|VAMP3_MOUSE;sp|P63044|VAMP2_MOUSE;tr|B0QZN5|B0QZN5_MOUSE	>sp|P63024|VAMP3_MOUSE Vesicle-associated membrane protein 3 OS=Mus musculus OX=10090 GN=Vamp3 PE=1 SV=1;>sp|P63044|VAMP2_MOUSE Vesicle-associated membrane protein 2 OS=Mus musculus OX=10090 GN=Vamp2 PE=1 SV=2;>tr|B0QZN5|B0QZN5_MOUSE Vesicle-associated mem	2	33	11.48	5.0267	0	0	0	2	0	0	655650	1172000	0	3767000	2015100	748320
sp|P63028|TCTP_MOUSE	sp|P63028|TCTP_MOUSE;tr|D3YU75|D3YU75_MOUSE	>sp|P63028|TCTP_MOUSE Translationally-controlled tumor protein OS=Mus musculus OX=10090 GN=Tpt1 PE=1 SV=1;>tr|D3YU75|D3YU75_MOUSE Translationally-controlled tumor protein OS=Mus musculus OX=10090 GN=Tpt1 PE=1 SV=1	6	31.4	19.462	52.428	11	19	18	19	16	17	177220000	281240000	177860000	374400000	256780000	252280000
sp|P63037|DNJA1_MOUSE	sp|P63037|DNJA1_MOUSE	>sp|P63037|DNJA1_MOUSE DnaJ homolog subfamily A member 1 OS=Mus musculus OX=10090 GN=Dnaja1 PE=1 SV=1	3	12.1	44.868	8.4837	5	3	5	5	5	5	3905500	4373600	4344600	5128800	5796900	4197600
sp|P63038|CH60_MOUSE	sp|P63038|CH60_MOUSE	>sp|P63038|CH60_MOUSE 60 kDa heat shock protein, mitochondrial OS=Mus musculus OX=10090 GN=Hspd1 PE=1 SV=1	29	56	60.955	323.31	53	67	65	80	68	74	101960000	120630000	100430000	215860000	125010000	148550000
tr|A0A0G2JFB4|A0A0G2JFB4_MOUSE	tr|A0A0G2JFB4|A0A0G2JFB4_MOUSE;tr|A0A0G2JH04|A0A0G2JH04_MOUSE;sp|P63073|IF4E_MOUSE;tr|A0A0G2JGT5|A0A0G2JGT5_MOUSE	>tr|A0A0G2JFB4|A0A0G2JFB4_MOUSE Eukaryotic translation initiation factor 4E OS=Mus musculus OX=10090 GN=Eif4e PE=1 SV=1;>tr|A0A0G2JH04|A0A0G2JH04_MOUSE Eukaryotic translation initiation factor 4E OS=Mus musculus OX=10090 GN=Eif4e PE=1 SV=1;>sp|P63073|IF4E_	2	18.9	15.057	13.812	2	2	2	1	1	2	7285100	8733300	7661900	8229800	8087700	7434500
sp|P63085|MK01_MOUSE	sp|P63085|MK01_MOUSE;tr|A0A338P736|A0A338P736_MOUSE	>sp|P63085|MK01_MOUSE Mitogen-activated protein kinase 1 OS=Mus musculus OX=10090 GN=Mapk1 PE=1 SV=3;>tr|A0A338P736|A0A338P736_MOUSE Mitogen-activated protein kinase 1 (Fragment) OS=Mus musculus OX=10090 GN=Mapk1 PE=1 SV=1	5	15.9	41.275	18.067	5	5	3	5	5	5	5115700	4139900	7324800	9565600	6855700	8942600
sp|P63087|PP1G_MOUSE	sp|P63087|PP1G_MOUSE;tr|A0A0G2JGC1|A0A0G2JGC1_MOUSE	>sp|P63087|PP1G_MOUSE Serine/threonine-protein phosphatase PP1-gamma catalytic subunit OS=Mus musculus OX=10090 GN=Ppp1cc PE=1 SV=1;>tr|A0A0G2JGC1|A0A0G2JGC1_MOUSE Serine/threonine-protein phosphatase OS=Mus musculus OX=10090 GN=Ppp1cc PE=1 SV=1	1	36.8	36.983	14.931	2	0	3	1	4	4	3629100	0	6067000	3378100	4396300	6653800
sp|P63101|1433Z_MOUSE	sp|P63101|1433Z_MOUSE;tr|A0A2I3BQ03|A0A2I3BQ03_MOUSE	>sp|P63101|1433Z_MOUSE 14-3-3 protein zeta/delta OS=Mus musculus OX=10090 GN=Ywhaz PE=1 SV=1;>tr|A0A2I3BQ03|A0A2I3BQ03_MOUSE 14-3-3 protein zeta/delta (Fragment) OS=Mus musculus OX=10090 GN=Ywhaz PE=1 SV=1	17	71.8	27.771	323.31	51	52	56	63	67	63	782750000	805580000	860750000	1009600000	1147300000	1021700000
tr|D3Z723|D3Z723_MOUSE	tr|D3Z723|D3Z723_MOUSE;sp|P63139|NFYB_MOUSE	>tr|D3Z723|D3Z723_MOUSE Nuclear transcription factor Y subunit beta (Fragment) OS=Mus musculus OX=10090 GN=Nfyb PE=1 SV=1;>sp|P63139|NFYB_MOUSE Nuclear transcription factor Y subunit beta OS=Mus musculus OX=10090 GN=Nfyb PE=1 SV=1	2	16	11.676	6.0568	1	2	2	2	3	2	10383000	21321000	6414500	22714000	10847000	19339000
sp|P63154|CRNL1_MOUSE	sp|P63154|CRNL1_MOUSE	>sp|P63154|CRNL1_MOUSE Crooked neck-like protein 1 OS=Mus musculus OX=10090 GN=Crnkl1 PE=1 SV=1	1	1.6	83.415	2.9995	0	0	1	1	1	0	98926	122470	100680	0	107470	0
tr|A0A0J9YUZ4|A0A0J9YUZ4_MOUSE	tr|A0A0J9YUZ4|A0A0J9YUZ4_MOUSE;sp|P63158|HMGB1_MOUSE;tr|A0A0J9YUD8|A0A0J9YUD8_MOUSE;tr|D3YVC6|D3YVC6_MOUSE;tr|D3YZ18|D3YZ18_MOUSE	>tr|A0A0J9YUZ4|A0A0J9YUZ4_MOUSE High mobility group protein B1 (Fragment) OS=Mus musculus OX=10090 GN=Hmgb1 PE=1 SV=1;>sp|P63158|HMGB1_MOUSE High mobility group protein B1 OS=Mus musculus OX=10090 GN=Hmgb1 PE=1 SV=2;>tr|A0A0J9YUD8|A0A0J9YUD8_MOUSE High mob	9	35.5	24.233	99.266	26	25	26	26	25	32	609970000	737270000	566590000	634270000	643490000	720300000
sp|P63166|SUMO1_MOUSE	sp|P63166|SUMO1_MOUSE;tr|A0A087WRQ4|A0A087WRQ4_MOUSE	>sp|P63166|SUMO1_MOUSE Small ubiquitin-related modifier 1 OS=Mus musculus OX=10090 GN=Sumo1 PE=1 SV=1;>tr|A0A087WRQ4|A0A087WRQ4_MOUSE Small ubiquitin-related modifier 1 OS=Mus musculus OX=10090 GN=Sumo1 PE=1 SV=1	4	43.6	11.557	14.485	6	4	4	3	6	6	45379000	44569000	50744000	56248000	64590000	64602000
tr|A0A0A0MQM0|A0A0A0MQM0_MOUSE	tr|A0A0A0MQM0|A0A0A0MQM0_MOUSE;sp|P63242|IF5A1_MOUSE	>tr|A0A0A0MQM0|A0A0A0MQM0_MOUSE Eukaryotic translation initiation factor 5A (Fragment) OS=Mus musculus OX=10090 GN=Eif5a PE=1 SV=1;>sp|P63242|IF5A1_MOUSE Eukaryotic translation initiation factor 5A-1 OS=Mus musculus OX=10090 GN=Eif5a PE=1 SV=2	10	65.1	16.302	126.83	20	25	18	28	23	27	91758000	131610000	150940000	200680000	157490000	154300000
sp|P63254|CRIP1_MOUSE	sp|P63254|CRIP1_MOUSE;tr|A0A0G2JEK2|A0A0G2JEK2_MOUSE	>sp|P63254|CRIP1_MOUSE Cysteine-rich protein 1 OS=Mus musculus OX=10090 GN=Crip1 PE=1 SV=2;>tr|A0A0G2JEK2|A0A0G2JEK2_MOUSE Cysteine-rich protein 1 OS=Mus musculus OX=10090 GN=Crip1 PE=1 SV=1	3	67.5	8.5497	19.765	1	3	2	5	7	7	34442000	43230000	36539000	47794000	62027000	90527000
sp|P63276|RS17_MOUSE	sp|P63276|RS17_MOUSE	>sp|P63276|RS17_MOUSE 40S ribosomal protein S17 OS=Mus musculus OX=10090 GN=Rps17 PE=1 SV=2	5	35.6	15.524	11.736	3	5	4	3	2	3	8846500	25931000	14354000	12355000	11816000	12933000
tr|Q8CFZ0|Q8CFZ0_MOUSE	tr|Q8CFZ0|Q8CFZ0_MOUSE;tr|G3UYP0|G3UYP0_MOUSE;sp|P63280|UBC9_MOUSE	>tr|Q8CFZ0|Q8CFZ0_MOUSE SUMO-conjugating enzyme UBC9 OS=Mus musculus OX=10090 GN=Ube2i PE=1 SV=1;>tr|G3UYP0|G3UYP0_MOUSE SUMO-conjugating enzyme UBC9 (Fragment) OS=Mus musculus OX=10090 GN=Ube2i PE=1 SV=1;>sp|P63280|UBC9_MOUSE SUMO-conjugating enzyme UBC9	7	61.4	11.225	27.393	16	11	10	8	9	11	80775000	96095000	69135000	161730000	70171000	165330000
sp|P63325|RS10_MOUSE	sp|P63325|RS10_MOUSE;tr|A0A338P731|A0A338P731_MOUSE;tr|Q3UW83|Q3UW83_MOUSE;tr|A0A338P7K4|A0A338P7K4_MOUSE	>sp|P63325|RS10_MOUSE 40S ribosomal protein S10 OS=Mus musculus OX=10090 GN=Rps10 PE=1 SV=1;>tr|A0A338P731|A0A338P731_MOUSE 40S ribosomal protein S10 (Fragment) OS=Mus musculus OX=10090 GN=Rps10 PE=1 SV=1;>tr|Q3UW83|Q3UW83_MOUSE 40S ribosomal protein S10 O	2	29.1	18.916	67.961	2	5	5	6	3	7	19074000	16830000	23352000	13161000	12232000	19214000
sp|P63328|PP2BA_MOUSE	sp|P63328|PP2BA_MOUSE	>sp|P63328|PP2BA_MOUSE Serine/threonine-protein phosphatase 2B catalytic subunit alpha isoform OS=Mus musculus OX=10090 GN=Ppp3ca PE=1 SV=1	2	7.5	58.643	5.877	0	1	1	1	2	1	693600	735860	906040	1350300	1050700	878510
sp|P67778|PHB_MOUSE	sp|P67778|PHB_MOUSE;tr|Q5SQG5|Q5SQG5_MOUSE	>sp|P67778|PHB_MOUSE Prohibitin OS=Mus musculus OX=10090 GN=Phb PE=1 SV=1;>tr|Q5SQG5|Q5SQG5_MOUSE Prohibitin (Fragment) OS=Mus musculus OX=10090 GN=Phb PE=1 SV=1	13	55.1	29.82	132.63	21	20	25	17	17	20	43209000	53595000	46116000	56282000	42650000	50786000
tr|G3UZA4|G3UZA4_MOUSE	tr|G3UZA4|G3UZA4_MOUSE;tr|G3UZJ5|G3UZJ5_MOUSE;sp|P67871|CSK2B_MOUSE;tr|G3UZX4|G3UZX4_MOUSE;tr|G3UWU5|G3UWU5_MOUSE;tr|G3UXG7|G3UXG7_MOUSE	>tr|G3UZA4|G3UZA4_MOUSE Casein kinase II subunit beta (Fragment) OS=Mus musculus OX=10090 GN=Csnk2b PE=1 SV=8;>tr|G3UZJ5|G3UZJ5_MOUSE Casein kinase II subunit beta (Fragment) OS=Mus musculus OX=10090 GN=Csnk2b PE=1 SV=2;>sp|P67871|CSK2B_MOUSE Casein kinase	2	18	14.279	4.6869	1	2	2	1	0	0	2801400	5240300	3496200	3577400	0	725530
sp|P67984|RL22_MOUSE	sp|P67984|RL22_MOUSE	>sp|P67984|RL22_MOUSE 60S ribosomal protein L22 OS=Mus musculus OX=10090 GN=Rpl22 PE=1 SV=2	4	28.9	14.759	12.552	4	6	5	3	5	1	27247000	68447000	28019000	26117000	23846000	34288000
sp|P68134|ACTS_MOUSE	sp|P68134|ACTS_MOUSE;sp|P68033|ACTC_MOUSE;sp|P63268|ACTH_MOUSE;sp|P62737|ACTA_MOUSE;tr|D3YZY0|D3YZY0_MOUSE;tr|D3Z2K3|D3Z2K3_MOUSE;tr|A0A1D5RM20|A0A1D5RM20_MOUSE	>sp|P68134|ACTS_MOUSE Actin, alpha skeletal muscle OS=Mus musculus OX=10090 GN=Acta1 PE=1 SV=1;>sp|P68033|ACTC_MOUSE Actin, alpha cardiac muscle 1 OS=Mus musculus OX=10090 GN=Actc1 PE=1 SV=1;>sp|P63268|ACTH_MOUSE Actin, gamma-enteric smooth muscle OS=Mus m	3	40.6	42.051	31.29	27	34	26	30	26	33	494720000	638590000	664700000	1119600000	918460000	817960000
tr|A0A338P786|A0A338P786_MOUSE	tr|A0A338P786|A0A338P786_MOUSE;sp|P68037|UB2L3_MOUSE;tr|A0A338P702|A0A338P702_MOUSE;tr|A0A338P7E5|A0A338P7E5_MOUSE	>tr|A0A338P786|A0A338P786_MOUSE Ubiquitin-conjugating enzyme E2 L3 (Fragment) OS=Mus musculus OX=10090 GN=Ube2l3 PE=1 SV=1;>sp|P68037|UB2L3_MOUSE Ubiquitin-conjugating enzyme E2 L3 OS=Mus musculus OX=10090 GN=Ube2l3 PE=1 SV=1;>tr|A0A338P702|A0A338P702_MOUS	7	74.7	16.821	33.356	7	12	5	11	10	9	43762000	53476000	32995000	66861000	55984000	49408000
sp|P68040|RACK1_MOUSE	sp|P68040|RACK1_MOUSE	>sp|P68040|RACK1_MOUSE Receptor of activated protein C kinase 1 OS=Mus musculus OX=10090 GN=Rack1 PE=1 SV=3	17	63.4	35.076	234.45	25	21	25	24	23	21	42002000	49668000	44239000	62222000	53337000	66246000
tr|H6TMF5|H6TMF5_MOUSE	tr|H6TMF5|H6TMF5_MOUSE;sp|P68181|KAPCB_MOUSE;sp|P05132|KAPCA_MOUSE	>tr|H6TMF5|H6TMF5_MOUSE cAMP-dependent protein kinase catalytic subunit beta (Fragment) OS=Mus musculus OX=10090 GN=Prkacb PE=1 SV=1;>sp|P68181|KAPCB_MOUSE cAMP-dependent protein kinase catalytic subunit beta OS=Mus musculus OX=10090 GN=Prkacb PE=1 SV=2;>s	2	13.8	22.532	5.2902	1	2	1	1	1	1	3523500	3151600	4023200	3616100	2354100	3028800
sp|P68254|1433T_MOUSE	sp|P68254|1433T_MOUSE;tr|F6YY69|F6YY69_MOUSE;tr|F6VW30|F6VW30_MOUSE	>sp|P68254|1433T_MOUSE 14-3-3 protein theta OS=Mus musculus OX=10090 GN=Ywhaq PE=1 SV=1;>tr|F6YY69|F6YY69_MOUSE 14-3-3 protein theta (Fragment) OS=Mus musculus OX=10090 GN=Ywhaq PE=1 SV=1;>tr|F6VW30|F6VW30_MOUSE 14-3-3 protein theta (Fragment) OS=Mus muscu	10	43.7	27.778	151.07	8	8	11	12	15	15	54346000	53723000	55046000	66978000	68462000	85409000
sp|P68368|TBA4A_MOUSE	sp|P68368|TBA4A_MOUSE;tr|A0A0A0MQA5|A0A0A0MQA5_MOUSE	>sp|P68368|TBA4A_MOUSE Tubulin alpha-4A chain OS=Mus musculus OX=10090 GN=Tuba4a PE=1 SV=1;>tr|A0A0A0MQA5|A0A0A0MQA5_MOUSE Tubulin alpha chain (Fragment) OS=Mus musculus OX=10090 GN=Tuba4a PE=1 SV=1	4	53.6	49.924	50.924	6	9	9	9	9	8	7367800	12571000	8508800	15811000	11155000	7232800
sp|P68372|TBB4B_MOUSE	sp|P68372|TBB4B_MOUSE;sp|Q9D6F9|TBB4A_MOUSE	>sp|P68372|TBB4B_MOUSE Tubulin beta-4B chain OS=Mus musculus OX=10090 GN=Tubb4b PE=1 SV=1;>sp|Q9D6F9|TBB4A_MOUSE Tubulin beta-4A chain OS=Mus musculus OX=10090 GN=Tubb4a PE=1 SV=3	5	52.8	49.83	323.31	57	59	54	65	60	80	195930000	197390000	125560000	243770000	203210000	227440000
sp|P68510|1433F_MOUSE	sp|P68510|1433F_MOUSE	>sp|P68510|1433F_MOUSE 14-3-3 protein eta OS=Mus musculus OX=10090 GN=Ywhah PE=1 SV=2	10	42.7	28.211	40.093	8	11	11	10	10	9	50684000	54926000	55114000	58860000	61625000	67918000
tr|A0A1Y7VLX7|A0A1Y7VLX7_MOUSE	tr|A0A1Y7VLX7|A0A1Y7VLX7_MOUSE;sp|P69566|RANB9_MOUSE;tr|E9Q5D6|E9Q5D6_MOUSE	>tr|A0A1Y7VLX7|A0A1Y7VLX7_MOUSE Ran-binding protein 9 (Fragment) OS=Mus musculus OX=10090 GN=Ranbp9 PE=1 SV=1;>sp|P69566|RANB9_MOUSE Ran-binding protein 9 OS=Mus musculus OX=10090 GN=Ranbp9 PE=1 SV=1;>tr|E9Q5D6|E9Q5D6_MOUSE Ran-binding protein 9 OS=Mus mus	1	9.5	15.789	3.1736	0	0	0	0	1	0	906930	0	1080800	1985600	1262200	0
sp|P70168|IMB1_MOUSE	sp|P70168|IMB1_MOUSE	>sp|P70168|IMB1_MOUSE Importin subunit beta-1 OS=Mus musculus OX=10090 GN=Kpnb1 PE=1 SV=2	15	19.2	97.183	68.577	16	11	15	16	13	16	15835000	17827000	14615000	20308000	16628000	19877000
sp|P70195|PSB7_MOUSE	sp|P70195|PSB7_MOUSE	>sp|P70195|PSB7_MOUSE Proteasome subunit beta type-7 OS=Mus musculus OX=10090 GN=Psmb7 PE=1 SV=1	4	18.8	29.891	9.8868	1	2	1	2	2	3	4587900	6999400	3102100	8564800	5929300	7663100
sp|P70202|LXN_MOUSE	sp|P70202|LXN_MOUSE	>sp|P70202|LXN_MOUSE Latexin OS=Mus musculus OX=10090 GN=Lxn PE=1 SV=2	4	17.6	25.492	28.219	5	5	3	9	7	7	10148000	8083700	9306600	25117000	13550000	18840000
sp|P70268|PKN1_MOUSE	sp|P70268|PKN1_MOUSE;tr|D6RH37|D6RH37_MOUSE	>sp|P70268|PKN1_MOUSE Serine/threonine-protein kinase N1 OS=Mus musculus OX=10090 GN=Pkn1 PE=1 SV=3;>tr|D6RH37|D6RH37_MOUSE Serine/threonine-protein kinase N1 OS=Mus musculus OX=10090 GN=Pkn1 PE=1 SV=1	9	11.6	104.41	20.472	4	5	5	7	3	7	721090	698430	704700	1081700	939910	1275500
tr|A2ALA0|A2ALA0_MOUSE	tr|A2ALA0|A2ALA0_MOUSE;sp|P70279|SURF6_MOUSE	>tr|A2ALA0|A2ALA0_MOUSE Surfeit locus protein 6 OS=Mus musculus OX=10090 GN=Surf6 PE=1 SV=1;>sp|P70279|SURF6_MOUSE Surfeit locus protein 6 OS=Mus musculus OX=10090 GN=Surf6 PE=1 SV=1	2	9.1	23.514	4.1862	2	1	2	0	1	3	493460	505650	142560	494780	697520	472830
tr|A0A0R4J008|A0A0R4J008_MOUSE	tr|A0A0R4J008|A0A0R4J008_MOUSE;sp|P70288|HDAC2_MOUSE;tr|Q8BQ10|Q8BQ10_MOUSE	>tr|A0A0R4J008|A0A0R4J008_MOUSE Histone deacetylase OS=Mus musculus OX=10090 GN=Hdac2 PE=1 SV=1;>sp|P70288|HDAC2_MOUSE Histone deacetylase 2 OS=Mus musculus OX=10090 GN=Hdac2 PE=1 SV=1;>tr|Q8BQ10|Q8BQ10_MOUSE Histone deacetylase 2 OS=Mus musculus OX=10090	2	13.3	55.33	7.8197	2	2	2	1	0	1	1262300	1282500	810260	1638700	1309100	1501000
tr|A2AN84|A2AN84_MOUSE	tr|A2AN84|A2AN84_MOUSE;sp|P70290|EM55_MOUSE;tr|B7ZCM0|B7ZCM0_MOUSE;tr|B7ZCL9|B7ZCL9_MOUSE;tr|B7ZCL8|B7ZCL8_MOUSE	>tr|A2AN84|A2AN84_MOUSE 55 kDa erythrocyte membrane protein OS=Mus musculus OX=10090 GN=Mpp1 PE=1 SV=1;>sp|P70290|EM55_MOUSE 55 kDa erythrocyte membrane protein OS=Mus musculus OX=10090 GN=Mpp1 PE=1 SV=1;>tr|B7ZCM0|B7ZCM0_MOUSE 55 kDa erythrocyte membrane	3	8.2	50.535	8.9438	1	2	2	2	3	4	763410	925650	294570	865190	467100	1527800
sp|P70296|PEBP1_MOUSE	sp|P70296|PEBP1_MOUSE;tr|D3Z1V4|D3Z1V4_MOUSE;tr|D6RHS6|D6RHS6_MOUSE	>sp|P70296|PEBP1_MOUSE Phosphatidylethanolamine-binding protein 1 OS=Mus musculus OX=10090 GN=Pebp1 PE=1 SV=3;>tr|D3Z1V4|D3Z1V4_MOUSE Phosphatidylethanolamine-binding protein 1 OS=Mus musculus OX=10090 GN=Pebp1 PE=1 SV=1;>tr|D6RHS6|D6RHS6_MOUSE Phosphatidy	9	72.2	20.83	222.53	15	19	19	19	17	19	161250000	170940000	136270000	234010000	164170000	181000000
tr|Q3UGN9|Q3UGN9_MOUSE	tr|Q3UGN9|Q3UGN9_MOUSE;sp|P70297|STAM1_MOUSE;tr|A0A0A6YVP6|A0A0A6YVP6_MOUSE	>tr|Q3UGN9|Q3UGN9_MOUSE Signal transducing adapter molecule 1 OS=Mus musculus OX=10090 GN=Stam PE=1 SV=1;>sp|P70297|STAM1_MOUSE Signal transducing adapter molecule 1 OS=Mus musculus OX=10090 GN=Stam PE=1 SV=3;>tr|A0A0A6YVP6|A0A0A6YVP6_MOUSE Signal transduc	1	5.2	51.144	4.2709	0	1	1	0	2	1	488360	551230	442450	700860	694700	678360
sp|P70303|PYRG2_MOUSE	sp|P70303|PYRG2_MOUSE;tr|A2AEQ5|A2AEQ5_MOUSE	>sp|P70303|PYRG2_MOUSE CTP synthase 2 OS=Mus musculus OX=10090 GN=Ctps2 PE=1 SV=1;>tr|A2AEQ5|A2AEQ5_MOUSE CTP synthase 2 OS=Mus musculus OX=10090 GN=Ctps2 PE=1 SV=1	6	12.1	65.514	17.033	3	4	3	4	4	4	1323500	1702800	1382200	1680800	478370	1749500
sp|P70315|WASP_MOUSE	sp|P70315|WASP_MOUSE	>sp|P70315|WASP_MOUSE Wiskott-Aldrich syndrome protein homolog OS=Mus musculus OX=10090 GN=Was PE=1 SV=1	12	33.1	54.191	70.875	8	13	11	8	12	8	15064000	27188000	17562000	24455000	25085000	25113000
tr|Q921W2|Q921W2_MOUSE	tr|Q921W2|Q921W2_MOUSE;sp|P70318|TIAR_MOUSE;tr|D3Z3Y4|D3Z3Y4_MOUSE;tr|D6RGU1|D6RGU1_MOUSE;tr|A0A0U1RPD3|A0A0U1RPD3_MOUSE;tr|Q8CII5|Q8CII5_MOUSE;tr|G5E8L2|G5E8L2_MOUSE;tr|Q80ZW7|Q80ZW7_MOUSE	>tr|Q921W2|Q921W2_MOUSE Nucleolysin TIAR OS=Mus musculus OX=10090 GN=Tial1 PE=1 SV=1;>sp|P70318|TIAR_MOUSE Nucleolysin TIAR OS=Mus musculus OX=10090 GN=Tial1 PE=1 SV=1;>tr|D3Z3Y4|D3Z3Y4_MOUSE Nucleolysin TIAR OS=Mus musculus OX=10090 GN=Tial1 PE=1 SV=2;>tr	8	27.5	41.53	22.146	7	5	7	7	7	5	4802400	6958400	4002700	5372000	5051200	3818400
sp|P70333|HNRH2_MOUSE	sp|P70333|HNRH2_MOUSE	>sp|P70333|HNRH2_MOUSE Heterogeneous nuclear ribonucleoprotein H2 OS=Mus musculus OX=10090 GN=Hnrnph2 PE=1 SV=1	7	36.5	49.279	70.909	7	11	10	10	16	13	24767000	23199000	21889000	28151000	25693000	32915000
tr|A0A3Q4EGR2|A0A3Q4EGR2_MOUSE	tr|A0A3Q4EGR2|A0A3Q4EGR2_MOUSE;sp|P70335|ROCK1_MOUSE	>tr|A0A3Q4EGR2|A0A3Q4EGR2_MOUSE Rho-associated protein kinase 1 OS=Mus musculus OX=10090 GN=Rock1 PE=4 SV=1;>sp|P70335|ROCK1_MOUSE Rho-associated protein kinase 1 OS=Mus musculus OX=10090 GN=Rock1 PE=1 SV=1	4	3.6	127.53	7.8968	2	1	2	0	2	1	82331	76069	78396	32253	83357	22208
tr|A2AR78|A2AR78_MOUSE	tr|A2AR78|A2AR78_MOUSE;tr|Q8C2D3|Q8C2D3_MOUSE;tr|A2AR76|A2AR76_MOUSE;sp|P70347|TANK_MOUSE	>tr|A2AR78|A2AR78_MOUSE TRAF family member-associated NF-kappa-B activator OS=Mus musculus OX=10090 GN=Tank PE=1 SV=1;>tr|Q8C2D3|Q8C2D3_MOUSE TRAF family member-associated NF-kappa-B activator OS=Mus musculus OX=10090 GN=Tank PE=1 SV=1;>tr|A2AR76|A2AR76_MO	2	8.3	40.906	4.2998	0	2	0	2	1	1	324650	394360	306570	1062600	290930	605620
sp|P70349|HINT1_MOUSE	sp|P70349|HINT1_MOUSE;tr|B0R1E3|B0R1E3_MOUSE	>sp|P70349|HINT1_MOUSE Histidine triad nucleotide-binding protein 1 OS=Mus musculus OX=10090 GN=Hint1 PE=1 SV=3;>tr|B0R1E3|B0R1E3_MOUSE Histidine triad nucleotide-binding protein 1 OS=Mus musculus OX=10090 GN=Hint1 PE=1 SV=1	3	36.5	13.777	9.7864	4	4	4	5	4	4	56967000	69017000	54700000	65446000	73138000	73179000
sp|P70353|NFYC_MOUSE	sp|P70353|NFYC_MOUSE;tr|A2A763|A2A763_MOUSE	>sp|P70353|NFYC_MOUSE Nuclear transcription factor Y subunit gamma OS=Mus musculus OX=10090 GN=Nfyc PE=1 SV=2;>tr|A2A763|A2A763_MOUSE Nuclear transcription factor Y subunit gamma (Fragment) OS=Mus musculus OX=10090 GN=Nfyc PE=1 SV=1	4	16.7	37.253	28.322	3	4	8	5	8	4	8705600	11824000	10841000	9935600	21824000	12928000
sp|P70362|UFD1_MOUSE	sp|P70362|UFD1_MOUSE	>sp|P70362|UFD1_MOUSE Ubiquitin recognition factor in ER-associated degradation protein 1 OS=Mus musculus OX=10090 GN=Ufd1 PE=1 SV=2	4	16.3	34.481	13.509	2	1	2	3	2	2	2757000	3221000	2525200	3711200	2555000	3419700
sp|P70372|ELAV1_MOUSE	sp|P70372|ELAV1_MOUSE	>sp|P70372|ELAV1_MOUSE ELAV-like protein 1 OS=Mus musculus OX=10090 GN=Elavl1 PE=1 SV=2	10	34	36.169	103.87	10	14	11	13	15	14	23308000	27683000	23327000	25629000	25560000	27467000
tr|Q5SV02|Q5SV02_MOUSE	tr|Q5SV02|Q5SV02_MOUSE;sp|P70388|RAD50_MOUSE;tr|E9PUJ2|E9PUJ2_MOUSE;tr|A8Y5I3|A8Y5I3_MOUSE	>tr|Q5SV02|Q5SV02_MOUSE DNA repair protein RAD50 OS=Mus musculus OX=10090 GN=Rad50 PE=1 SV=1;>sp|P70388|RAD50_MOUSE DNA repair protein RAD50 OS=Mus musculus OX=10090 GN=Rad50 PE=1 SV=1;>tr|E9PUJ2|E9PUJ2_MOUSE DNA repair protein RAD50 OS=Mus musculus OX=100	6	6	153.54	15.011	3	4	2	3	3	5	440180	340470	510940	263690	257210	650160
tr|Q4FE56|Q4FE56_MOUSE	tr|Q4FE56|Q4FE56_MOUSE;sp|P70398|USP9X_MOUSE	>tr|Q4FE56|Q4FE56_MOUSE Probable ubiquitin carboxyl-terminal hydrolase FAF-X OS=Mus musculus OX=10090 GN=Usp9x PE=1 SV=1;>sp|P70398|USP9X_MOUSE Probable ubiquitin carboxyl-terminal hydrolase FAF-X OS=Mus musculus OX=10090 GN=Usp9x PE=1 SV=2	2	0.8	290.21	4.2691	2	2	1	1	1	3	1946000	1668100	1638400	1899900	1752100	2314300
sp|P70399|TP53B_MOUSE	sp|P70399|TP53B_MOUSE	>sp|P70399|TP53B_MOUSE TP53-binding protein 1 OS=Mus musculus OX=10090 GN=Tp53bp1 PE=1 SV=3	9	8.5	212.73	24.168	5	10	5	7	11	4	2004600	1197600	737710	1051700	894990	713670
sp|P70404|IDHG1_MOUSE	sp|P70404|IDHG1_MOUSE	>sp|P70404|IDHG1_MOUSE Isocitrate dehydrogenase [NAD] subunit gamma 1, mitochondrial OS=Mus musculus OX=10090 GN=Idh3g PE=1 SV=1	4	15.8	42.785	17.065	0	2	5	6	2	4	0	728980	1197100	1350100	1256900	1482600
tr|F8WJB9|F8WJB9_MOUSE	tr|F8WJB9|F8WJB9_MOUSE;sp|P70429|EVL_MOUSE;tr|E9PVP4|E9PVP4_MOUSE;tr|A0A1Y7VJA2|A0A1Y7VJA2_MOUSE	>tr|F8WJB9|F8WJB9_MOUSE Ena/VASP-like protein OS=Mus musculus OX=10090 GN=Evl PE=1 SV=1;>sp|P70429|EVL_MOUSE Ena/VASP-like protein OS=Mus musculus OX=10090 GN=Evl PE=1 SV=2;>tr|E9PVP4|E9PVP4_MOUSE Ena/VASP-like protein OS=Mus musculus OX=10090 GN=Evl PE=1	15	44.6	42.893	103.77	24	25	25	24	23	25	36097000	47014000	45015000	52297000	48360000	48991000
sp|P70441|NHRF1_MOUSE	sp|P70441|NHRF1_MOUSE	>sp|P70441|NHRF1_MOUSE Na(+)/H(+) exchange regulatory cofactor NHE-RF1 OS=Mus musculus OX=10090 GN=Slc9a3r1 PE=1 SV=3	14	45.6	38.6	168.41	20	18	18	22	22	24	45764000	49870000	56731000	64712000	70420000	59234000
sp|P70444|BID_MOUSE	sp|P70444|BID_MOUSE	>sp|P70444|BID_MOUSE BH3-interacting domain death agonist OS=Mus musculus OX=10090 GN=Bid PE=1 SV=2	3	22.1	21.951	7.002	1	1	0	2	1	0	1416800	1039800	583030	1817500	433160	704830
sp|P70445|4EBP2_MOUSE	sp|P70445|4EBP2_MOUSE	>sp|P70445|4EBP2_MOUSE Eukaryotic translation initiation factor 4E-binding protein 2 OS=Mus musculus OX=10090 GN=Eif4ebp2 PE=1 SV=1	2	37.5	12.898	4.6959	0	0	0	0	2	0	3254900	3629900	2203200	2965000	4815300	3121900
sp|P70452|STX4_MOUSE	sp|P70452|STX4_MOUSE;tr|D6RJ29|D6RJ29_MOUSE	>sp|P70452|STX4_MOUSE Syntaxin-4 OS=Mus musculus OX=10090 GN=Stx4 PE=1 SV=1;>tr|D6RJ29|D6RJ29_MOUSE Syntaxin 4A (placental) OS=Mus musculus OX=10090 GN=Stx4a PE=1 SV=1	2	7.4	34.165	3.1564	0	0	0	0	2	0	729350	0	0	485830	1356800	1482800
sp|P70460|VASP_MOUSE	sp|P70460|VASP_MOUSE	>sp|P70460|VASP_MOUSE Vasodilator-stimulated phosphoprotein OS=Mus musculus OX=10090 GN=Vasp PE=1 SV=4	15	45.9	39.666	138.27	19	28	20	29	25	29	54851000	63728000	54591000	91598000	65283000	78424000
sp|Q60817|NACA_MOUSE	sp|Q60817|NACA_MOUSE;sp|P70670|NACAM_MOUSE	>sp|Q60817|NACA_MOUSE Nascent polypeptide-associated complex subunit alpha OS=Mus musculus OX=10090 GN=Naca PE=1 SV=1;>sp|P70670|NACAM_MOUSE Nascent polypeptide-associated complex subunit alpha, muscle-specific form OS=Mus musculus OX=10090 GN=Naca PE=1 SV	5	26.5	23.384	78.634	16	17	13	14	20	14	226270000	223760000	153390000	211560000	215580000	220710000
sp|P70671|IRF3_MOUSE	sp|P70671|IRF3_MOUSE;tr|A0A140LHE6|A0A140LHE6_MOUSE	>sp|P70671|IRF3_MOUSE Interferon regulatory factor 3 OS=Mus musculus OX=10090 GN=Irf3 PE=1 SV=1;>tr|A0A140LHE6|A0A140LHE6_MOUSE Interferon regulatory factor 3 (Fragment) OS=Mus musculus OX=10090 GN=Irf3 PE=1 SV=1	2	6.2	46.852	5.0377	0	1	1	0	1	1	0	249720	170560	659240	987660	435750
sp|P70677|CASP3_MOUSE	sp|P70677|CASP3_MOUSE;tr|A0A1B0GRX1|A0A1B0GRX1_MOUSE	>sp|P70677|CASP3_MOUSE Caspase-3 OS=Mus musculus OX=10090 GN=Casp3 PE=1 SV=1;>tr|A0A1B0GRX1|A0A1B0GRX1_MOUSE Caspase-3 OS=Mus musculus OX=10090 GN=Casp3 PE=1 SV=1	8	26.7	31.474	22.362	9	3	5	4	4	5	7357300	7281400	6918600	4448100	9217500	11403000
sp|P70698|PYRG1_MOUSE	sp|P70698|PYRG1_MOUSE	>sp|P70698|PYRG1_MOUSE CTP synthase 1 OS=Mus musculus OX=10090 GN=Ctps1 PE=1 SV=2	4	8.8	66.682	7.9568	0	3	0	1	0	1	630080	717570	664670	1330300	133910	601010
sp|P70699|LYAG_MOUSE	sp|P70699|LYAG_MOUSE	>sp|P70699|LYAG_MOUSE Lysosomal alpha-glucosidase OS=Mus musculus OX=10090 GN=Gaa PE=1 SV=2	1	1.9	106.25	2.6978	0	1	0	1	1	1	222000	252040	138760	247840	214290	233460
sp|P80313|TCPH_MOUSE	sp|P80313|TCPH_MOUSE;tr|A0A0N4SV00|A0A0N4SV00_MOUSE	>sp|P80313|TCPH_MOUSE T-complex protein 1 subunit eta OS=Mus musculus OX=10090 GN=Cct7 PE=1 SV=1;>tr|A0A0N4SV00|A0A0N4SV00_MOUSE T-complex protein 1 subunit eta OS=Mus musculus OX=10090 GN=Cct7 PE=1 SV=1	22	41.9	59.652	99.462	26	30	32	28	23	24	22293000	25057000	21295000	29850000	24496000	28304000
sp|P80314|TCPB_MOUSE	sp|P80314|TCPB_MOUSE	>sp|P80314|TCPB_MOUSE T-complex protein 1 subunit beta OS=Mus musculus OX=10090 GN=Cct2 PE=1 SV=4	24	56.1	57.477	217.28	35	45	42	49	41	51	44931000	52621000	48613000	70055000	54858000	58163000
sp|P80315|TCPD_MOUSE	sp|P80315|TCPD_MOUSE;tr|G5E839|G5E839_MOUSE	>sp|P80315|TCPD_MOUSE T-complex protein 1 subunit delta OS=Mus musculus OX=10090 GN=Cct4 PE=1 SV=3;>tr|G5E839|G5E839_MOUSE T-complex protein 1 subunit delta OS=Mus musculus OX=10090 GN=Cct4 PE=1 SV=1	13	29.1	58.066	75.048	16	19	15	18	15	18	13123000	16838000	13069000	25011000	14436000	16448000
sp|P80316|TCPE_MOUSE	sp|P80316|TCPE_MOUSE	>sp|P80316|TCPE_MOUSE T-complex protein 1 subunit epsilon OS=Mus musculus OX=10090 GN=Cct5 PE=1 SV=1	25	48.8	59.623	123.83	35	45	39	42	31	36	32009000	39049000	37495000	42782000	34693000	38778000
sp|P80317|TCPZ_MOUSE	sp|P80317|TCPZ_MOUSE	>sp|P80317|TCPZ_MOUSE T-complex protein 1 subunit zeta OS=Mus musculus OX=10090 GN=Cct6a PE=1 SV=3	16	34.7	58.004	129.91	21	18	21	23	21	22	36540000	37627000	34421000	42622000	33067000	37592000
sp|P80318|TCPG_MOUSE	sp|P80318|TCPG_MOUSE;tr|E9Q133|E9Q133_MOUSE;tr|Q3U0I3|Q3U0I3_MOUSE	>sp|P80318|TCPG_MOUSE T-complex protein 1 subunit gamma OS=Mus musculus OX=10090 GN=Cct3 PE=1 SV=1;>tr|E9Q133|E9Q133_MOUSE T-complex protein 1 subunit gamma OS=Mus musculus OX=10090 GN=Cct3 PE=1 SV=1;>tr|Q3U0I3|Q3U0I3_MOUSE T-complex protein 1 subunit gamm	23	48.6	60.629	274.35	36	38	35	30	37	40	21697000	33420000	29972000	31008000	26823000	33655000
sp|P81069|GABP2_MOUSE	sp|P81069|GABP2_MOUSE	>sp|P81069|GABP2_MOUSE GA-binding protein subunit beta-2 OS=Mus musculus OX=10090 GN=Gabpb2 PE=1 SV=2	4	8.7	45.658	13.997	5	3	5	2	2	2	4005400	5770700	3755600	4606500	4886000	2152200
tr|Q3UKN6|Q3UKN6_MOUSE	tr|Q3UKN6|Q3UKN6_MOUSE;sp|P81117|NUCB2_MOUSE	>tr|Q3UKN6|Q3UKN6_MOUSE Nucleobindin-2 OS=Mus musculus OX=10090 GN=Nucb2 PE=1 SV=1;>sp|P81117|NUCB2_MOUSE Nucleobindin-2 OS=Mus musculus OX=10090 GN=Nucb2 PE=1 SV=2	3	7.9	50.353	5.1714	0	1	0	0	1	1	0	84146	182890	148530	273070	397920
tr|A0A087WQ51|A0A087WQ51_MOUSE	tr|A0A087WQ51|A0A087WQ51_MOUSE;tr|A0A087WQ74|A0A087WQ74_MOUSE;sp|P81183|IKZF2_MOUSE;tr|A0A087WNY4|A0A087WNY4_MOUSE;tr|A0A087WNX1|A0A087WNX1_MOUSE	>tr|A0A087WQ51|A0A087WQ51_MOUSE Zinc finger protein Helios OS=Mus musculus OX=10090 GN=Ikzf2 PE=1 SV=1;>tr|A0A087WQ74|A0A087WQ74_MOUSE Zinc finger protein Helios OS=Mus musculus OX=10090 GN=Ikzf2 PE=1 SV=1;>sp|P81183|IKZF2_MOUSE Zinc finger protein Helios	2	5.5	51.165	12.005	1	3	2	3	1	1	3865800	7315900	8662900	4880600	6918600	8321400
sp|P83741|WNK1_MOUSE	sp|P83741|WNK1_MOUSE	>sp|P83741|WNK1_MOUSE Serine/threonine-protein kinase WNK1 OS=Mus musculus OX=10090 GN=Wnk1 PE=1 SV=2	5	3	250.93	15.139	2	2	3	3	2	2	1839100	409020	505990	685910	882530	875640
sp|P83870|PHF5A_MOUSE	sp|P83870|PHF5A_MOUSE	>sp|P83870|PHF5A_MOUSE PHD finger-like domain-containing protein 5A OS=Mus musculus OX=10090 GN=Phf5a PE=1 SV=1	2	14.5	12.405	5.7554	0	0	1	1	1	2	1170200	5716400	5605400	6499400	8242300	7233900
sp|Q8VCK3|TBG2_MOUSE	sp|Q8VCK3|TBG2_MOUSE;sp|P83887|TBG1_MOUSE	>sp|Q8VCK3|TBG2_MOUSE Tubulin gamma-2 chain OS=Mus musculus OX=10090 GN=Tubg2 PE=1 SV=1;>sp|P83887|TBG1_MOUSE Tubulin gamma-1 chain OS=Mus musculus OX=10090 GN=Tubg1 PE=1 SV=1	2	5.3	51.121	4.995	1	2	2	1	1	2	482030	609940	568690	742780	695950	639150
sp|P83917|CBX1_MOUSE	sp|P83917|CBX1_MOUSE	>sp|P83917|CBX1_MOUSE Chromobox protein homolog 1 OS=Mus musculus OX=10090 GN=Cbx1 PE=1 SV=1	8	38.9	21.418	32.421	4	10	18	19	15	11	44662000	65029000	59521000	89125000	69937000	100690000
tr|A0A087WQE6|A0A087WQE6_MOUSE	tr|A0A087WQE6|A0A087WQE6_MOUSE;sp|P83940|ELOC_MOUSE;tr|A0A087WNT1|A0A087WNT1_MOUSE;tr|A0A087WPE4|A0A087WPE4_MOUSE	>tr|A0A087WQE6|A0A087WQE6_MOUSE Elongin-C (Fragment) OS=Mus musculus OX=10090 GN=Eloc PE=1 SV=1;>sp|P83940|ELOC_MOUSE Elongin-C OS=Mus musculus OX=10090 GN=Eloc PE=1 SV=1;>tr|A0A087WNT1|A0A087WNT1_MOUSE Elongin-C OS=Mus musculus OX=10090 GN=Eloc PE=1 SV=1;	4	49.5	10.657	93.033	1	4	3	4	4	6	13168000	16997000	15859000	13686000	17266000	22228000
sp|P84089|ERH_MOUSE	sp|P84089|ERH_MOUSE;tr|A0A1W2P7H9|A0A1W2P7H9_MOUSE;tr|A0A1W2P7T3|A0A1W2P7T3_MOUSE;tr|G3UW85|G3UW85_MOUSE	>sp|P84089|ERH_MOUSE Enhancer of rudimentary homolog OS=Mus musculus OX=10090 GN=Erh PE=1 SV=1;>tr|A0A1W2P7H9|A0A1W2P7H9_MOUSE Enhancer of rudimentary homolog OS=Mus musculus OX=10090 GN=Erh PE=1 SV=1;>tr|A0A1W2P7T3|A0A1W2P7T3_MOUSE Enhancer of rudimentary	5	46.2	12.259	179.32	17	16	13	12	14	16	368300000	362100000	306000000	321280000	398330000	378240000
sp|P84096|RHOG_MOUSE	sp|P84096|RHOG_MOUSE;tr|A0A1B0GSL4|A0A1B0GSL4_MOUSE	>sp|P84096|RHOG_MOUSE Rho-related GTP-binding protein RhoG OS=Mus musculus OX=10090 GN=Rhog PE=1 SV=1;>tr|A0A1B0GSL4|A0A1B0GSL4_MOUSE Rho-related GTP-binding protein RhoG (Fragment) OS=Mus musculus OX=10090 GN=Rhog PE=1 SV=1	4	28.8	21.308	14.625	4	5	6	6	7	4	4361900	4223700	4339700	6670800	4561800	4059500
tr|A2A547|A2A547_MOUSE	tr|A2A547|A2A547_MOUSE;sp|P84099|RL19_MOUSE	>tr|A2A547|A2A547_MOUSE Ribosomal protein L19 OS=Mus musculus OX=10090 GN=Rpl19 PE=1 SV=1;>sp|P84099|RL19_MOUSE 60S ribosomal protein L19 OS=Mus musculus OX=10090 GN=Rpl19 PE=1 SV=1	2	9.3	23.247	5.4801	2	2	2	0	1	0	9645700	8536700	9473200	3438800	4165100	4456400
sp|P84104|SRSF3_MOUSE	sp|P84104|SRSF3_MOUSE;tr|A2A4X6|A2A4X6_MOUSE	>sp|P84104|SRSF3_MOUSE Serine/arginine-rich splicing factor 3 OS=Mus musculus OX=10090 GN=Srsf3 PE=1 SV=1;>tr|A2A4X6|A2A4X6_MOUSE MCG21910 OS=Mus musculus OX=10090 GN=Gm12355 PE=4 SV=1	2	18.3	19.329	25.427	10	11	12	14	15	13	99270000	189210000	213980000	217990000	201380000	235100000
sp|P97287|MCL1_MOUSE	sp|P97287|MCL1_MOUSE	>sp|P97287|MCL1_MOUSE Induced myeloid leukemia cell differentiation protein Mcl-1 homolog OS=Mus musculus OX=10090 GN=Mcl1 PE=1 SV=3	1	6.3	35.217	4.6374	0	1	0	1	0	0	0	0	0	546110	409800	0
tr|B5B2U1|B5B2U1_MOUSE	tr|B5B2U1|B5B2U1_MOUSE;tr|B5B2U2|B5B2U2_MOUSE;sp|P97305|NFAC3_MOUSE;tr|Q3UZ64|Q3UZ64_MOUSE	>tr|B5B2U1|B5B2U1_MOUSE Nuclear factor of activated T-cells c3 isoform IAL-Xa OS=Mus musculus OX=10090 GN=Nfatc3 PE=1 SV=1;>tr|B5B2U2|B5B2U2_MOUSE Nuclear factor of activated T-cells c3 isoform IAL-deltaXa OS=Mus musculus OX=10090 GN=Nfatc3 PE=1 SV=1;>sp|P	2	2.5	114.49	3.8572	1	0	0	0	0	1	0	0	0	0	0	0
sp|P97310|MCM2_MOUSE	sp|P97310|MCM2_MOUSE	>sp|P97310|MCM2_MOUSE DNA replication licensing factor MCM2 OS=Mus musculus OX=10090 GN=Mcm2 PE=1 SV=3	16	23.6	102.08	56.648	7	9	9	8	8	13	4235600	5586400	4347800	7209600	4205000	5494500
tr|Q3ULG5|Q3ULG5_MOUSE	tr|Q3ULG5|Q3ULG5_MOUSE;sp|P97311|MCM6_MOUSE	>tr|Q3ULG5|Q3ULG5_MOUSE DNA helicase OS=Mus musculus OX=10090 GN=Mcm6 PE=1 SV=1;>sp|P97311|MCM6_MOUSE DNA replication licensing factor MCM6 OS=Mus musculus OX=10090 GN=Mcm6 PE=1 SV=1	14	20.5	89.783	76.008	13	12	13	19	11	20	3852200	5121200	4486000	5291200	4410400	6217300
sp|P97315|CSRP1_MOUSE	sp|P97315|CSRP1_MOUSE	>sp|P97315|CSRP1_MOUSE Cysteine and glycine-rich protein 1 OS=Mus musculus OX=10090 GN=Csrp1 PE=1 SV=3	4	36.8	20.583	15.345	3	4	4	6	5	9	8286000	15732000	5552100	9120700	10247000	11164000
sp|P97351|RS3A_MOUSE	sp|P97351|RS3A_MOUSE	>sp|P97351|RS3A_MOUSE 40S ribosomal protein S3a OS=Mus musculus OX=10090 GN=Rps3a PE=1 SV=3	7	26.5	29.885	23.656	8	10	12	7	7	7	13837000	19512000	13636000	13452000	9553900	11831000
sp|P97352|S10AD_MOUSE	sp|P97352|S10AD_MOUSE;tr|A0A0A0MQ90|A0A0A0MQ90_MOUSE	>sp|P97352|S10AD_MOUSE Protein S100-A13 OS=Mus musculus OX=10090 GN=S100a13 PE=1 SV=1;>tr|A0A0A0MQ90|A0A0A0MQ90_MOUSE Protein S100-A13 OS=Mus musculus OX=10090 GN=S100a13 PE=1 SV=1	5	40.8	11.158	24.489	6	7	10	5	6	7	50852000	64062000	49553000	74021000	68536000	69781000
tr|E9PZ58|E9PZ58_MOUSE	tr|E9PZ58|E9PZ58_MOUSE;sp|P97355|SPSY_MOUSE	>tr|E9PZ58|E9PZ58_MOUSE Spermine synthase OS=Mus musculus OX=10090 GN=Sms PE=1 SV=1;>sp|P97355|SPSY_MOUSE Spermine synthase OS=Mus musculus OX=10090 GN=Sms PE=1 SV=1	4	20.2	28.655	6.2528	0	0	0	1	1	1	261310	486990	633360	1139600	1455500	2021100
tr|G3UXZ5|G3UXZ5_MOUSE	tr|G3UXZ5|G3UXZ5_MOUSE;sp|P97371|PSME1_MOUSE;tr|G3UXY0|G3UXY0_MOUSE;tr|G3X9K9|G3X9K9_MOUSE;tr|G3UWN9|G3UWN9_MOUSE	>tr|G3UXZ5|G3UXZ5_MOUSE Proteasome activator complex subunit 1 (Fragment) OS=Mus musculus OX=10090 GN=Psme1 PE=1 SV=1;>sp|P97371|PSME1_MOUSE Proteasome activator complex subunit 1 OS=Mus musculus OX=10090 GN=Psme1 PE=1 SV=2;>tr|G3UXY0|G3UXY0_MOUSE Proteaso	16	56.7	27.411	220.74	38	41	43	41	42	39	169260000	248750000	179360000	240820000	227790000	210690000
tr|G3X9V0|G3X9V0_MOUSE	tr|G3X9V0|G3X9V0_MOUSE;sp|P97372|PSME2_MOUSE	>tr|G3X9V0|G3X9V0_MOUSE MCG22048, isoform CRA_a OS=Mus musculus OX=10090 GN=Psme2 PE=1 SV=1;>sp|P97372|PSME2_MOUSE Proteasome activator complex subunit 2 OS=Mus musculus OX=10090 GN=Psme2 PE=1 SV=4	7	36.8	26.159	186.56	19	19	19	21	21	20	64051000	86341000	85990000	107170000	116500000	103110000
sp|P97376|FRG1_MOUSE	sp|P97376|FRG1_MOUSE	>sp|P97376|FRG1_MOUSE Protein FRG1 OS=Mus musculus OX=10090 GN=Frg1 PE=1 SV=2	4	20.2	29.127	18.112	4	4	5	4	3	1	4651700	5524800	5143200	5436000	6321300	3435400
sp|P97379|G3BP2_MOUSE	sp|P97379|G3BP2_MOUSE	>sp|P97379|G3BP2_MOUSE Ras GTPase-activating protein-binding protein 2 OS=Mus musculus OX=10090 GN=G3bp2 PE=1 SV=2	5	15.1	54.087	9.9834	1	0	1	1	2	3	430380	670950	641820	634680	346650	744520
sp|P97384|ANX11_MOUSE	sp|P97384|ANX11_MOUSE;tr|D3Z7U0|D3Z7U0_MOUSE	>sp|P97384|ANX11_MOUSE Annexin A11 OS=Mus musculus OX=10090 GN=Anxa11 PE=1 SV=2;>tr|D3Z7U0|D3Z7U0_MOUSE Annexin OS=Mus musculus OX=10090 GN=Anxa11 PE=1 SV=1	13	27.6	54.079	63.501	20	23	21	18	24	22	18804000	22248000	20272000	26134000	22708000	24502000
sp|P97427|DPYL1_MOUSE	sp|P97427|DPYL1_MOUSE;tr|Q6P1J1|Q6P1J1_MOUSE	>sp|P97427|DPYL1_MOUSE Dihydropyrimidinase-related protein 1 OS=Mus musculus OX=10090 GN=Crmp1 PE=1 SV=1;>tr|Q6P1J1|Q6P1J1_MOUSE Crmp1 protein OS=Mus musculus OX=10090 GN=Crmp1 PE=1 SV=1	4	13.3	62.167	14.53	2	4	2	2	1	3	207030	1074100	291590	773710	391630	366020
tr|S4R1F2|S4R1F2_MOUSE	tr|S4R1F2|S4R1F2_MOUSE;tr|D3Z0S1|D3Z0S1_MOUSE;tr|A0A0N4SV57|A0A0N4SV57_MOUSE;tr|A0A0N4SW89|A0A0N4SW89_MOUSE;sp|P97429|ANXA4_MOUSE	>tr|S4R1F2|S4R1F2_MOUSE Annexin OS=Mus musculus OX=10090 GN=Anxa4 PE=1 SV=1;>tr|D3Z0S1|D3Z0S1_MOUSE Annexin (Fragment) OS=Mus musculus OX=10090 GN=Anxa4 PE=1 SV=1;>tr|A0A0N4SV57|A0A0N4SV57_MOUSE Annexin (Fragment) OS=Mus musculus OX=10090 GN=Anxa4 PE=1 SV=	1	5.6	21.867	8.7574	0	0	1	0	1	1	1287300	2278200	1081600	1353900	1542500	0
sp|P97450|ATP5J_MOUSE	sp|P97450|ATP5J_MOUSE	>sp|P97450|ATP5J_MOUSE ATP synthase-coupling factor 6, mitochondrial OS=Mus musculus OX=10090 GN=Atp5pf PE=1 SV=1	7	49.1	12.496	126.29	9	10	12	14	15	14	108490000	172870000	124650000	283210000	245110000	264660000
sp|P97452|BOP1_MOUSE	sp|P97452|BOP1_MOUSE	>sp|P97452|BOP1_MOUSE Ribosome biogenesis protein BOP1 OS=Mus musculus OX=10090 GN=Bop1 PE=1 SV=1	6	13	82.545	25.844	2	5	3	7	6	5	2272500	1777200	2426000	4754800	2967000	3005700
tr|D3YYM6|D3YYM6_MOUSE	tr|D3YYM6|D3YYM6_MOUSE;tr|D3Z1S8|D3Z1S8_MOUSE;tr|Q91V55|Q91V55_MOUSE;sp|P97461|RS5_MOUSE	>tr|D3YYM6|D3YYM6_MOUSE 40S ribosomal protein S5 (Fragment) OS=Mus musculus OX=10090 GN=Rps5 PE=1 SV=1;>tr|D3Z1S8|D3Z1S8_MOUSE 40S ribosomal protein S5 (Fragment) OS=Mus musculus OX=10090 GN=Rps5 PE=1 SV=1;>tr|Q91V55|Q91V55_MOUSE 40S ribosomal protein S5 O	2	16.5	20.413	12.229	0	0	2	1	1	1	0	0	4281100	7563200	3567400	3466700
sp|P97465|DOK1_MOUSE	sp|P97465|DOK1_MOUSE	>sp|P97465|DOK1_MOUSE Docking protein 1 OS=Mus musculus OX=10090 GN=Dok1 PE=1 SV=2	3	14.1	52.451	13.155	1	3	1	3	1	2	467570	1187300	397060	1568900	469360	1374500
sp|P97470|PP4C_MOUSE	sp|P97470|PP4C_MOUSE	>sp|P97470|PP4C_MOUSE Serine/threonine-protein phosphatase 4 catalytic subunit OS=Mus musculus OX=10090 GN=Ppp4c PE=1 SV=2	3	13	35.08	8.9818	1	1	2	0	1	1	1291300	989850	1196200	1292500	1399600	1471600
sp|P97492|RGS14_MOUSE	sp|P97492|RGS14_MOUSE	>sp|P97492|RGS14_MOUSE Regulator of G-protein signaling 14 OS=Mus musculus OX=10090 GN=Rgs14 PE=1 SV=2	7	20.1	59.846	17.19	2	2	3	5	5	3	1404000	1757900	1297900	6191800	2302200	1628700
sp|P97494|GSH1_MOUSE	sp|P97494|GSH1_MOUSE	>sp|P97494|GSH1_MOUSE Glutamate--cysteine ligase catalytic subunit OS=Mus musculus OX=10090 GN=Gclc PE=1 SV=4	2	3.9	72.571	4.8001	0	0	1	1	0	1	41804	249370	402160	419480	115950	601290
tr|Q3UNN4|Q3UNN4_MOUSE	tr|Q3UNN4|Q3UNN4_MOUSE;sp|P97496|SMRC1_MOUSE	>tr|Q3UNN4|Q3UNN4_MOUSE SWI/SNF complex subunit SMARCC1 OS=Mus musculus OX=10090 GN=Smarcc1 PE=1 SV=1;>sp|P97496|SMRC1_MOUSE SWI/SNF complex subunit SMARCC1 OS=Mus musculus OX=10090 GN=Smarcc1 PE=1 SV=2	6	14.2	122.78	45.421	3	2	2	6	2	2	2422100	950780	2081400	3587800	1767800	1263800
sp|P97760|RPB3_MOUSE	sp|P97760|RPB3_MOUSE;tr|A0A1D5RML8|A0A1D5RML8_MOUSE;tr|A0A1D5RLD4|A0A1D5RLD4_MOUSE	>sp|P97760|RPB3_MOUSE DNA-directed RNA polymerase II subunit RPB3 OS=Mus musculus OX=10090 GN=Polr2c PE=1 SV=2;>tr|A0A1D5RML8|A0A1D5RML8_MOUSE DNA-directed RNA polymerase II subunit RPB3 OS=Mus musculus OX=10090 GN=Polr2c PE=1 SV=1;>tr|A0A1D5RLD4|A0A1D5RLD	4	17.1	31.443	14.738	0	1	4	5	2	3	130920	1977600	4231200	6516400	2897500	3940300
sp|P97765|WBP2_MOUSE	sp|P97765|WBP2_MOUSE	>sp|P97765|WBP2_MOUSE WW domain-binding protein 2 OS=Mus musculus OX=10090 GN=Wbp2 PE=1 SV=1	2	17.6	28.032	2.7784	0	1	1	1	0	0	0	1492400	1068900	0	0	1110600
sp|P97807|FUMH_MOUSE	sp|P97807|FUMH_MOUSE	>sp|P97807|FUMH_MOUSE Fumarate hydratase, mitochondrial OS=Mus musculus OX=10090 GN=Fh PE=1 SV=3	9	21.5	54.356	40.12	11	11	10	11	11	13	9644000	20000000	8651600	12766000	11886000	13485000
tr|A0A0R4J0P5|A0A0R4J0P5_MOUSE	tr|A0A0R4J0P5|A0A0R4J0P5_MOUSE;sp|P97814|PPIP1_MOUSE	>tr|A0A0R4J0P5|A0A0R4J0P5_MOUSE Proline-serine-threonine phosphatase-interacting protein 1 OS=Mus musculus OX=10090 GN=Pstpip1 PE=1 SV=1;>sp|P97814|PPIP1_MOUSE Proline-serine-threonine phosphatase-interacting protein 1 OS=Mus musculus OX=10090 GN=Pstpip1 P	5	14.2	47.576	13.611	0	0	1	4	2	2	1147600	1252300	829520	1770400	1363900	1361000
sp|P97821|CATC_MOUSE	sp|P97821|CATC_MOUSE	>sp|P97821|CATC_MOUSE Dipeptidyl peptidase 1 OS=Mus musculus OX=10090 GN=Ctsc PE=1 SV=1	5	16.5	52.376	18.318	1	1	2	4	1	1	4643900	5264000	4706500	5905700	3789000	5752200
tr|E9Q5H2|E9Q5H2_MOUSE	tr|E9Q5H2|E9Q5H2_MOUSE;tr|E9PZF5|E9PZF5_MOUSE;sp|P97822|AN32E_MOUSE	>tr|E9Q5H2|E9Q5H2_MOUSE Acidic leucine-rich nuclear phosphoprotein 32 family member E (Fragment) OS=Mus musculus OX=10090 GN=Anp32e PE=1 SV=1;>tr|E9PZF5|E9PZF5_MOUSE Acidic leucine-rich nuclear phosphoprotein 32 family member E (Fragment) OS=Mus musculus O	4	43	12.078	48.945	8	9	8	7	7	8	48187000	59611000	60761000	157060000	72868000	78132000
sp|P97823|LYPA1_MOUSE	sp|P97823|LYPA1_MOUSE;tr|D3Z111|D3Z111_MOUSE;tr|J3QP56|J3QP56_MOUSE	>sp|P97823|LYPA1_MOUSE Acyl-protein thioesterase 1 OS=Mus musculus OX=10090 GN=Lypla1 PE=1 SV=1;>tr|D3Z111|D3Z111_MOUSE Acyl-protein thioesterase 1 OS=Mus musculus OX=10090 GN=Lypla1 PE=1 SV=1;>tr|J3QP56|J3QP56_MOUSE Acyl-protein thioesterase 1 OS=Mus musc	3	18.3	24.687	13.22	1	3	4	4	1	2	5270300	8632500	6668000	9124000	9915900	12183000
sp|P97825|JUPI1_MOUSE	sp|P97825|JUPI1_MOUSE	>sp|P97825|JUPI1_MOUSE Jupiter microtubule associated homolog 1 OS=Mus musculus OX=10090 GN=Jpt1 PE=1 SV=3	4	55.2	16.08	112.2	6	6	9	10	11	10	40694000	51335000	44690000	77813000	58000000	68341000
sp|P97855|G3BP1_MOUSE	sp|P97855|G3BP1_MOUSE	>sp|P97855|G3BP1_MOUSE Ras GTPase-activating protein-binding protein 1 OS=Mus musculus OX=10090 GN=G3bp1 PE=1 SV=1	10	30.5	51.828	50.827	12	15	20	14	20	17	15847000	14904000	16141000	17031000	16096000	15195000
tr|A0A338P6W1|A0A338P6W1_MOUSE	tr|A0A338P6W1|A0A338P6W1_MOUSE;sp|P97868|RBBP6_MOUSE	>tr|A0A338P6W1|A0A338P6W1_MOUSE E3 ubiquitin-protein ligase RBBP6 (Fragment) OS=Mus musculus OX=10090 GN=Rbbp6 PE=1 SV=1;>sp|P97868|RBBP6_MOUSE E3 ubiquitin-protein ligase RBBP6 OS=Mus musculus OX=10090 GN=Rbbp6 PE=1 SV=5	2	1.5	195.75	4.0181	0	1	0	0	0	1	0	126380	0	89497	0	105610
sp|P97930|KTHY_MOUSE	sp|P97930|KTHY_MOUSE;tr|D3Z3R3|D3Z3R3_MOUSE	>sp|P97930|KTHY_MOUSE Thymidylate kinase OS=Mus musculus OX=10090 GN=Dtymk PE=1 SV=2;>tr|D3Z3R3|D3Z3R3_MOUSE Thymidylate kinase OS=Mus musculus OX=10090 GN=Dtymk PE=1 SV=1	3	15.1	23.914	7.5704	2	3	0	3	2	4	965390	1297400	672250	1839000	613480	2076300
sp|P98083|SHC1_MOUSE	sp|P98083|SHC1_MOUSE;tr|E9QLZ0|E9QLZ0_MOUSE;sp|Q8BMC3|SHC2_MOUSE	>sp|P98083|SHC1_MOUSE SHC-transforming protein 1 OS=Mus musculus OX=10090 GN=Shc1 PE=1 SV=3;>tr|E9QLZ0|E9QLZ0_MOUSE MCG18215 OS=Mus musculus OX=10090 GN=Shc2 PE=4 SV=2;>sp|Q8BMC3|SHC2_MOUSE SHC-transforming protein 2 OS=Mus musculus OX=10090 GN=Shc2 PE=1 S	2	6	62.607	4.0805	1	0	0	0	2	0	76282	0	0	176100	116890	0
sp|P99024|TBB5_MOUSE	sp|P99024|TBB5_MOUSE	>sp|P99024|TBB5_MOUSE Tubulin beta-5 chain OS=Mus musculus OX=10090 GN=Tubb5 PE=1 SV=1	4	45.3	49.67	115.31	17	22	21	22	20	28	87418000	112560000	79707000	171670000	100890000	110090000
sp|P99026|PSB4_MOUSE	sp|P99026|PSB4_MOUSE	>sp|P99026|PSB4_MOUSE Proteasome subunit beta type-4 OS=Mus musculus OX=10090 GN=Psmb4 PE=1 SV=1	6	30.7	29.116	101.13	8	7	9	5	6	5	40965000	45540000	41596000	40260000	26123000	44309000
sp|P99027|RLA2_MOUSE	sp|P99027|RLA2_MOUSE	>sp|P99027|RLA2_MOUSE 60S acidic ribosomal protein P2 OS=Mus musculus OX=10090 GN=Rplp2 PE=1 SV=3	9	73.9	11.651	263.34	16	24	24	31	18	23	312390000	531250000	373940000	601020000	330640000	396630000
sp|P99029|PRDX5_MOUSE	sp|P99029|PRDX5_MOUSE;tr|G3UZJ4|G3UZJ4_MOUSE;tr|H3BJQ7|H3BJQ7_MOUSE	>sp|P99029|PRDX5_MOUSE Peroxiredoxin-5, mitochondrial OS=Mus musculus OX=10090 GN=Prdx5 PE=1 SV=2;>tr|G3UZJ4|G3UZJ4_MOUSE Peroxiredoxin-5, mitochondrial OS=Mus musculus OX=10090 GN=Prdx5 PE=1 SV=1;>tr|H3BJQ7|H3BJQ7_MOUSE Peroxiredoxin OS=Mus musculus OX=10	11	46.2	21.897	85.27	16	19	20	20	17	25	35936000	56295000	43417000	68800000	56895000	52407000
sp|Q00417|TCF7_MOUSE	sp|Q00417|TCF7_MOUSE;tr|Q8C402|Q8C402_MOUSE;tr|D3Z654|D3Z654_MOUSE;tr|Q8BGZ9|Q8BGZ9_MOUSE;sp|P27782|LEF1_MOUSE;tr|F6XQR1|F6XQR1_MOUSE;tr|F6WPX2|F6WPX2_MOUSE;tr|E9Q990|E9Q990_MOUSE;tr|D3YWT3|D3YWT3_MOUSE;tr|A0A0R4J1G0|A0A0R4J1G0_MOUSE;tr|F6WBK9|F6WBK9_MOUSE;tr|E9QQ91|E9QQ91_MOUSE;sp|Q924A0|TF7L2_MOUSE;tr|D3Z2K5|D3Z2K5_MOUSE;tr|Q3V1G9|Q3V1G9_MOUSE;tr|E9QQ90|E9QQ90_MOUSE;tr|E9QQ89|E9QQ89_MOUSE	>sp|Q00417|TCF7_MOUSE Transcription factor 7 OS=Mus musculus OX=10090 GN=Tcf7 PE=2 SV=2;>tr|Q8C402|Q8C402_MOUSE Lymphoid enhancer binding factor 1, isoform CRA_b OS=Mus musculus OX=10090 GN=Lef1 PE=1 SV=1;>tr|D3Z654|D3Z654_MOUSE Lymphoid enhancer binding f	4	14.3	45.465	16.874	2	1	2	2	3	2	2060300	2207300	255840	5094800	3051500	3477300
sp|Q00422|GABPA_MOUSE	sp|Q00422|GABPA_MOUSE	>sp|Q00422|GABPA_MOUSE GA-binding protein alpha chain OS=Mus musculus OX=10090 GN=Gabpa PE=1 SV=2	5	11.7	51.344	16.863	6	4	4	5	7	5	5154700	8526800	4629300	7489700	5376600	6465800
sp|Q00612|G6PD1_MOUSE	sp|Q00612|G6PD1_MOUSE;tr|A3KG36|A3KG36_MOUSE	>sp|Q00612|G6PD1_MOUSE Glucose-6-phosphate 1-dehydrogenase X OS=Mus musculus OX=10090 GN=G6pdx PE=1 SV=3;>tr|A3KG36|A3KG36_MOUSE Glucose-6-phosphate 1-dehydrogenase (Fragment) OS=Mus musculus OX=10090 GN=G6pdx PE=1 SV=1	15	31.3	59.262	44.384	13	13	9	12	14	13	9377100	8989900	7657100	11249000	10096000	12282000
sp|Q00623|APOA1_MOUSE	sp|Q00623|APOA1_MOUSE	>sp|Q00623|APOA1_MOUSE Apolipoprotein A-I OS=Mus musculus OX=10090 GN=Apoa1 PE=1 SV=2	1	4.9	30.615	3.359	1	1	1	0	0	0	1251500	1599700	1185500	0	0	0
sp|Q00899|TYY1_MOUSE	sp|Q00899|TYY1_MOUSE	>sp|Q00899|TYY1_MOUSE Transcriptional repressor protein YY1 OS=Mus musculus OX=10090 GN=Yy1 PE=1 SV=1	4	10.6	44.716	14.837	4	2	2	5	3	3	5399500	4800100	5174400	6166100	5256600	4953500
sp|Q00PI9|HNRL2_MOUSE	sp|Q00PI9|HNRL2_MOUSE	>sp|Q00PI9|HNRL2_MOUSE Heterogeneous nuclear ribonucleoprotein U-like protein 2 OS=Mus musculus OX=10090 GN=Hnrnpul2 PE=1 SV=2	24	32.1	84.939	284.69	38	33	46	44	49	47	29120000	32595000	33874000	45149000	41391000	45146000
sp|Q01147|CREB1_MOUSE	sp|Q01147|CREB1_MOUSE;tr|Q62347|Q62347_MOUSE;tr|A0A087WRI6|A0A087WRI6_MOUSE	>sp|Q01147|CREB1_MOUSE Cyclic AMP-responsive element-binding protein 1 OS=Mus musculus OX=10090 GN=Creb1 PE=1 SV=1;>tr|Q62347|Q62347_MOUSE Cyclic AMP-responsive element-binding protein 1 OS=Mus musculus OX=10090 GN=Creb1 PE=1 SV=1;>tr|A0A087WRI6|A0A087WRI6	4	23.2	36.674	77.244	6	1	6	5	4	6	16949000	10121000	37140000	28545000	29288000	33335000
tr|E9Q1S3|E9Q1S3_MOUSE	tr|E9Q1S3|E9Q1S3_MOUSE;sp|Q01405|SC23A_MOUSE	>tr|E9Q1S3|E9Q1S3_MOUSE Protein transport protein SEC23 OS=Mus musculus OX=10090 GN=Sec23a PE=1 SV=1;>sp|Q01405|SC23A_MOUSE Protein transport protein Sec23A OS=Mus musculus OX=10090 GN=Sec23a PE=1 SV=2	4	9.9	82.955	11.587	1	4	3	3	0	0	395880	541500	341480	912400	742940	639440
tr|A2AUR7|A2AUR7_MOUSE	tr|A2AUR7|A2AUR7_MOUSE;tr|Q9D031|Q9D031_MOUSE;sp|Q01730|RSU1_MOUSE	>tr|A2AUR7|A2AUR7_MOUSE Ras suppressor protein 1 OS=Mus musculus OX=10090 GN=Rsu1 PE=1 SV=1;>tr|Q9D031|Q9D031_MOUSE Ras suppressor protein 1 OS=Mus musculus OX=10090 GN=Rsu1 PE=1 SV=1;>sp|Q01730|RSU1_MOUSE Ras suppressor protein 1 OS=Mus musculus OX=10090	3	16.2	29.543	7.4208	1	3	0	2	1	2	2106800	4437100	1342900	4150100	2718700	2898400
sp|Q01853|TERA_MOUSE	sp|Q01853|TERA_MOUSE	>sp|Q01853|TERA_MOUSE Transitional endoplasmic reticulum ATPase OS=Mus musculus OX=10090 GN=Vcp PE=1 SV=4	37	48.6	89.321	323.31	76	77	91	102	79	84	74651000	108490000	87530000	131760000	92887000	114270000
sp|Q02053|UBA1_MOUSE	sp|Q02053|UBA1_MOUSE	>sp|Q02053|UBA1_MOUSE Ubiquitin-like modifier-activating enzyme 1 OS=Mus musculus OX=10090 GN=Uba1 PE=1 SV=1	32	38.4	117.81	323.31	49	69	68	67	55	78	57401000	62601000	54864000	65666000	53839000	72293000
sp|Q02111|KPCT_MOUSE	sp|Q02111|KPCT_MOUSE;tr|F8WGT6|F8WGT6_MOUSE	>sp|Q02111|KPCT_MOUSE Protein kinase C theta type OS=Mus musculus OX=10090 GN=Prkcq PE=1 SV=1;>tr|F8WGT6|F8WGT6_MOUSE Protein kinase C theta type (Fragment) OS=Mus musculus OX=10090 GN=Prkcq PE=1 SV=1	5	9.2	81.572	10.448	0	3	4	2	2	1	298550	562850	598840	675210	513970	295480
sp|Q02614|S30BP_MOUSE	sp|Q02614|S30BP_MOUSE	>sp|Q02614|S30BP_MOUSE SAP30-binding protein OS=Mus musculus OX=10090 GN=Sap30bp PE=1 SV=2	3	10.7	33.832	9.1172	3	3	2	1	3	2	3136500	2928700	3027700	6280700	3268300	3245800
tr|D3Z7D5|D3Z7D5_MOUSE	tr|D3Z7D5|D3Z7D5_MOUSE;sp|Q02788|CO6A2_MOUSE	>tr|D3Z7D5|D3Z7D5_MOUSE Collagen alpha-2(VI) chain OS=Mus musculus OX=10090 GN=Col6a2 PE=1 SV=1;>sp|Q02788|CO6A2_MOUSE Collagen alpha-2(VI) chain OS=Mus musculus OX=10090 GN=Col6a2 PE=1 SV=3	3	3.9	98.987	8.4127	2	3	3	0	1	0	361110	429340	675470	248910	269520	148250
sp|Q02819|NUCB1_MOUSE	sp|Q02819|NUCB1_MOUSE;tr|A0A1C7CYU3|A0A1C7CYU3_MOUSE;tr|A0A1B0GR41|A0A1B0GR41_MOUSE	>sp|Q02819|NUCB1_MOUSE Nucleobindin-1 OS=Mus musculus OX=10090 GN=Nucb1 PE=1 SV=2;>tr|A0A1C7CYU3|A0A1C7CYU3_MOUSE Nucleobindin 1, isoform CRA_b OS=Mus musculus OX=10090 GN=Nucb1 PE=1 SV=1;>tr|A0A1B0GR41|A0A1B0GR41_MOUSE Nucleobindin-1 (Fragment) OS=Mus mus	17	44.4	53.408	97.366	10	7	9	16	15	13	9431200	12456000	8559600	16574000	15409000	14967000
tr|A0A0R4IZY3|A0A0R4IZY3_MOUSE	tr|A0A0R4IZY3|A0A0R4IZY3_MOUSE;sp|Q03142|FGFR4_MOUSE	>tr|A0A0R4IZY3|A0A0R4IZY3_MOUSE Fibroblast growth factor receptor OS=Mus musculus OX=10090 GN=Fgfr4 PE=3 SV=1;>sp|Q03142|FGFR4_MOUSE Fibroblast growth factor receptor 4 OS=Mus musculus OX=10090 GN=Fgfr4 PE=1 SV=3	1	1.6	88.588	2.6343	0	1	0	0	0	0	0	878120	0	0	0	0
tr|A2AMS3|A2AMS3_MOUSE	tr|A2AMS3|A2AMS3_MOUSE;sp|Q03249|GALT_MOUSE	>tr|A2AMS3|A2AMS3_MOUSE Galactose-1-phosphate uridylyltransferase OS=Mus musculus OX=10090 GN=Galt PE=1 SV=1;>sp|Q03249|GALT_MOUSE Galactose-1-phosphate uridylyltransferase OS=Mus musculus OX=10090 GN=Galt PE=1 SV=3	1	2.8	41.235	2.8349	0	0	0	1	0	0	382400	539080	0	322280	716570	0
sp|Q03265|ATPA_MOUSE	sp|Q03265|ATPA_MOUSE;tr|D3Z6F5|D3Z6F5_MOUSE	>sp|Q03265|ATPA_MOUSE ATP synthase subunit alpha, mitochondrial OS=Mus musculus OX=10090 GN=Atp5f1a PE=1 SV=1;>tr|D3Z6F5|D3Z6F5_MOUSE ATP synthase subunit alpha OS=Mus musculus OX=10090 GN=Atp5a1 PE=1 SV=1	25	49.9	59.752	323.31	63	64	61	72	61	81	182660000	224360000	246120000	280280000	228820000	246250000
tr|G5E8H3|G5E8H3_MOUSE	tr|G5E8H3|G5E8H3_MOUSE;sp|Q03267|IKZF1_MOUSE;tr|Q5SWT9|Q5SWT9_MOUSE;tr|Q5SWU0|Q5SWU0_MOUSE	>tr|G5E8H3|G5E8H3_MOUSE DNA-binding protein Ikaros OS=Mus musculus OX=10090 GN=Ikzf1 PE=1 SV=1;>sp|Q03267|IKZF1_MOUSE DNA-binding protein Ikaros OS=Mus musculus OX=10090 GN=Ikzf1 PE=1 SV=2;>tr|Q5SWT9|Q5SWT9_MOUSE DNA-binding protein Ikaros OS=Mus musculus	3	8.9	57.201	50.484	4	5	5	6	4	6	2863800	4095200	4178800	6772100	5083000	4825200
tr|G3UYF9|G3UYF9_MOUSE	tr|G3UYF9|G3UYF9_MOUSE;sp|Q03958|PFD6_MOUSE	>tr|G3UYF9|G3UYF9_MOUSE Prefoldin subunit 6 OS=Mus musculus OX=10090 GN=Pfdn6 PE=1 SV=1;>sp|Q03958|PFD6_MOUSE Prefoldin subunit 6 OS=Mus musculus OX=10090 GN=Pfdn6 PE=1 SV=1	6	30.7	11.409	56.95	3	6	4	6	5	8	10771000	20783000	8779200	16314000	17233000	16186000
sp|Q04207|TF65_MOUSE	sp|Q04207|TF65_MOUSE	>sp|Q04207|TF65_MOUSE Transcription factor p65 OS=Mus musculus OX=10090 GN=Rela PE=1 SV=1	8	20.4	60.211	32.626	3	5	6	9	6	9	3867300	4362600	3715400	6904600	4932400	4932400
sp|Q04447|KCRB_MOUSE	sp|Q04447|KCRB_MOUSE	>sp|Q04447|KCRB_MOUSE Creatine kinase B-type OS=Mus musculus OX=10090 GN=Ckb PE=1 SV=1	11	40.4	42.713	144.35	15	19	19	18	23	20	27813000	27276000	41905000	41805000	32411000	36038000
sp|Q04750|TOP1_MOUSE	sp|Q04750|TOP1_MOUSE	>sp|Q04750|TOP1_MOUSE DNA topoisomerase 1 OS=Mus musculus OX=10090 GN=Top1 PE=1 SV=2	6	8.5	90.875	12.451	4	3	5	4	5	3	955810	1610000	1009600	1414100	1353500	1429800
sp|Q04857|CO6A1_MOUSE	sp|Q04857|CO6A1_MOUSE	>sp|Q04857|CO6A1_MOUSE Collagen alpha-1(VI) chain OS=Mus musculus OX=10090 GN=Col6a1 PE=1 SV=1	4	4.2	108.49	8.3913	1	2	4	0	1	1	1049800	685330	594830	360850	253180	383200
sp|Q05144|RAC2_MOUSE	sp|Q05144|RAC2_MOUSE;tr|A0A2R8VHH0|A0A2R8VHH0_MOUSE	>sp|Q05144|RAC2_MOUSE Ras-related C3 botulinum toxin substrate 2 OS=Mus musculus OX=10090 GN=Rac2 PE=1 SV=1;>tr|A0A2R8VHH0|A0A2R8VHH0_MOUSE Ras-related C3 botulinum toxin substrate 2 (Fragment) OS=Mus musculus OX=10090 GN=Rac2 PE=1 SV=1	3	30.7	21.441	24.447	11	13	11	15	10	13	64093000	91205000	72683000	73991000	72512000	73436000
sp|Q05186|RCN1_MOUSE	sp|Q05186|RCN1_MOUSE	>sp|Q05186|RCN1_MOUSE Reticulocalbin-1 OS=Mus musculus OX=10090 GN=Rcn1 PE=1 SV=1	4	17.2	38.113	54.005	6	2	6	9	6	8	6607100	7279300	7859900	11711000	11199000	9624500
sp|Q05816|FABP5_MOUSE	sp|Q05816|FABP5_MOUSE	>sp|Q05816|FABP5_MOUSE Fatty acid-binding protein 5 OS=Mus musculus OX=10090 GN=Fabp5 PE=1 SV=3	7	48.1	15.137	33.545	9	5	8	5	6	8	15253000	25838000	23603000	23885000	24545000	23329000
sp|Q05CL8|LARP7_MOUSE	sp|Q05CL8|LARP7_MOUSE;tr|A2AMD0|A2AMD0_MOUSE	>sp|Q05CL8|LARP7_MOUSE La-related protein 7 OS=Mus musculus OX=10090 GN=Larp7 PE=1 SV=2;>tr|A2AMD0|A2AMD0_MOUSE Predicted gene 12666 (Fragment) OS=Mus musculus OX=10090 GN=Gm12666 PE=1 SV=1	4	8.4	64.802	10.91	2	2	1	0	0	0	584450	857430	508850	650770	1093600	626140
sp|Q05D44|IF2P_MOUSE	sp|Q05D44|IF2P_MOUSE	>sp|Q05D44|IF2P_MOUSE Eukaryotic translation initiation factor 5B OS=Mus musculus OX=10090 GN=Eif5b PE=1 SV=2	5	6.7	137.61	20.995	2	4	3	2	3	3	188740	529720	412370	448790	513480	330380
sp|Q06138|CAB39_MOUSE	sp|Q06138|CAB39_MOUSE	>sp|Q06138|CAB39_MOUSE Calcium-binding protein 39 OS=Mus musculus OX=10090 GN=Cab39 PE=1 SV=2	2	5.9	39.842	3.6676	0	0	2	2	2	1	102060	306470	136040	138680	179140	291090
tr|D3Z6W2|D3Z6W2_MOUSE	tr|D3Z6W2|D3Z6W2_MOUSE;sp|Q06180|PTN2_MOUSE	>tr|D3Z6W2|D3Z6W2_MOUSE Tyrosine-protein phosphatase non-receptor type OS=Mus musculus OX=10090 GN=Ptpn2 PE=1 SV=1;>sp|Q06180|PTN2_MOUSE Tyrosine-protein phosphatase non-receptor type 2 OS=Mus musculus OX=10090 GN=Ptpn2 PE=1 SV=2	1	3.9	42.291	3.6007	1	0	0	0	0	0	377450	372400	0	390920	393350	338880
sp|Q06185|ATP5I_MOUSE	sp|Q06185|ATP5I_MOUSE;tr|Q8BTB6|Q8BTB6_MOUSE	>sp|Q06185|ATP5I_MOUSE ATP synthase subunit e, mitochondrial OS=Mus musculus OX=10090 GN=Atp5me PE=1 SV=2;>tr|Q8BTB6|Q8BTB6_MOUSE ATP synthase, H+-transporting, mitochondrial F1F0 complex, subunit E OS=Mus musculus OX=10090 GN=Atp5k PE=1 SV=1	5	56.3	8.2355	21.826	8	5	8	7	7	7	83767000	103800000	107600000	118510000	108410000	136020000
sp|Q07076|ANXA7_MOUSE	sp|Q07076|ANXA7_MOUSE;tr|A0A2C9F2D2|A0A2C9F2D2_MOUSE	>sp|Q07076|ANXA7_MOUSE Annexin A7 OS=Mus musculus OX=10090 GN=Anxa7 PE=1 SV=2;>tr|A0A2C9F2D2|A0A2C9F2D2_MOUSE Annexin OS=Mus musculus OX=10090 GN=Anxa7 PE=1 SV=1	9	21.6	49.925	75.093	11	15	11	12	11	12	7331000	9647800	5616600	9608600	7681500	10342000
sp|Q07417|ACADS_MOUSE	sp|Q07417|ACADS_MOUSE	>sp|Q07417|ACADS_MOUSE Short-chain specific acyl-CoA dehydrogenase, mitochondrial OS=Mus musculus OX=10090 GN=Acads PE=1 SV=2	10	27.4	44.889	64.601	6	11	9	16	8	11	8415100	9778300	9540500	16962000	8100600	11322000
sp|Q07797|LG3BP_MOUSE	sp|Q07797|LG3BP_MOUSE	>sp|Q07797|LG3BP_MOUSE Galectin-3-binding protein OS=Mus musculus OX=10090 GN=Lgals3bp PE=1 SV=1	4	9.5	64.49	15.444	5	4	5	3	2	1	1632800	1557600	1531100	719040	68874	1159500
tr|A0A1B0GS13|A0A1B0GS13_MOUSE	tr|A0A1B0GS13|A0A1B0GS13_MOUSE;tr|A0A1B0GT81|A0A1B0GT81_MOUSE;tr|A0A1B0GTA4|A0A1B0GTA4_MOUSE;sp|Q07813|BAX_MOUSE;tr|A0A1B0GSH8|A0A1B0GSH8_MOUSE	>tr|A0A1B0GS13|A0A1B0GS13_MOUSE Apoptosis regulator BAX (Fragment) OS=Mus musculus OX=10090 GN=Bax PE=1 SV=1;>tr|A0A1B0GT81|A0A1B0GT81_MOUSE Apoptosis regulator BAX OS=Mus musculus OX=10090 GN=Bax PE=1 SV=1;>tr|A0A1B0GTA4|A0A1B0GTA4_MOUSE Apoptosis regulat	4	41.2	12.513	23.212	2	2	3	5	2	2	7190900	3215300	6816200	10030000	11126000	9509900
sp|Q08024|PEBB_MOUSE	sp|Q08024|PEBB_MOUSE	>sp|Q08024|PEBB_MOUSE Core-binding factor subunit beta OS=Mus musculus OX=10090 GN=Cbfb PE=1 SV=1	5	34.2	22.03	101.46	8	8	7	7	6	8	24255000	24876000	20945000	24293000	27017000	27279000
sp|Q08093|CNN2_MOUSE	sp|Q08093|CNN2_MOUSE;tr|D3Z7R6|D3Z7R6_MOUSE	>sp|Q08093|CNN2_MOUSE Calponin-2 OS=Mus musculus OX=10090 GN=Cnn2 PE=1 SV=1;>tr|D3Z7R6|D3Z7R6_MOUSE Calponin OS=Mus musculus OX=10090 GN=Cnn2 PE=1 SV=1	11	45.2	33.155	78.69	8	10	8	11	15	11	48194000	54720000	46029000	75752000	61219000	68208000
tr|Q3TY99|Q3TY99_MOUSE	tr|Q3TY99|Q3TY99_MOUSE;tr|E0CXU1|E0CXU1_MOUSE;tr|E0CXS2|E0CXS2_MOUSE;tr|E0CY14|E0CY14_MOUSE;sp|Q08122|TLE3_MOUSE;tr|J3KMT7|J3KMT7_MOUSE	>tr|Q3TY99|Q3TY99_MOUSE Transducin-like enhancer protein 3 OS=Mus musculus OX=10090 GN=Tle3 PE=1 SV=1;>tr|E0CXU1|E0CXU1_MOUSE Transducin-like enhancer protein 3 OS=Mus musculus OX=10090 GN=Tle3 PE=1 SV=1;>tr|E0CXS2|E0CXS2_MOUSE Transducin-like enhancer pro	1	2.5	76.497	5.1599	1	1	3	3	3	4	206400	428440	135980	345230	772270	619240
sp|Q08642|PADI2_MOUSE	sp|Q08642|PADI2_MOUSE	>sp|Q08642|PADI2_MOUSE Protein-arginine deiminase type-2 OS=Mus musculus OX=10090 GN=Padi2 PE=1 SV=2	3	5.8	76.249	6.9676	1	2	0	1	0	0	121950	366590	97044	0	113820	0
tr|A2AW05|A2AW05_MOUSE	tr|A2AW05|A2AW05_MOUSE;sp|Q08943|SSRP1_MOUSE	>tr|A2AW05|A2AW05_MOUSE FACT complex subunit SSRP1 (Fragment) OS=Mus musculus OX=10090 GN=Ssrp1 PE=1 SV=1;>sp|Q08943|SSRP1_MOUSE FACT complex subunit SSRP1 OS=Mus musculus OX=10090 GN=Ssrp1 PE=1 SV=2	15	28.4	71.527	66.959	11	19	13	15	14	18	10418000	13337000	9934900	19043000	14959000	18082000
tr|A0A1W2P6F0|A0A1W2P6F0_MOUSE	tr|A0A1W2P6F0|A0A1W2P6F0_MOUSE;sp|Q09200|B4GN1_MOUSE	>tr|A0A1W2P6F0|A0A1W2P6F0_MOUSE Beta-1,4 N-acetylgalactosaminyltransferase 1 OS=Mus musculus OX=10090 GN=B4galnt1 PE=1 SV=1;>sp|Q09200|B4GN1_MOUSE Beta-1,4 N-acetylgalactosaminyltransferase 1 OS=Mus musculus OX=10090 GN=B4galnt1 PE=1 SV=1	2	10.9	20.986	4.8261	1	3	2	2	2	1	468330	595860	465020	271820	278260	628440
sp|Q0P678|ZCH18_MOUSE	sp|Q0P678|ZCH18_MOUSE;tr|H3BIW0|H3BIW0_MOUSE;tr|G3X8T2|G3X8T2_MOUSE	>sp|Q0P678|ZCH18_MOUSE Zinc finger CCCH domain-containing protein 18 OS=Mus musculus OX=10090 GN=Zc3h18 PE=1 SV=1;>tr|H3BIW0|H3BIW0_MOUSE Zinc finger CCCH domain-containing protein 18 OS=Mus musculus OX=10090 GN=Zc3h18 PE=1 SV=1;>tr|G3X8T2|G3X8T2_MOUSE RIK	5	9.2	105.69	16.289	4	3	7	4	5	3	2955300	3500900	3179000	4230400	3090700	4424100
sp|Q0VBL3|RBM15_MOUSE	sp|Q0VBL3|RBM15_MOUSE	>sp|Q0VBL3|RBM15_MOUSE RNA-binding protein 15 OS=Mus musculus OX=10090 GN=Rbm15 PE=1 SV=1	2	4.3	105.72	5.4537	1	1	2	1	1	1	293370	353100	161720	89040	333980	382450
tr|A0A0R4J0U2|A0A0R4J0U2_MOUSE	tr|A0A0R4J0U2|A0A0R4J0U2_MOUSE;sp|Q0VGB7|PP4R2_MOUSE;tr|A0A0N4SV05|A0A0N4SV05_MOUSE	>tr|A0A0R4J0U2|A0A0R4J0U2_MOUSE Serine/threonine-protein phosphatase 4 regulatory subunit 2 OS=Mus musculus OX=10090 GN=Ppp4r2 PE=1 SV=1;>sp|Q0VGB7|PP4R2_MOUSE Serine/threonine-protein phosphatase 4 regulatory subunit 2 OS=Mus musculus OX=10090 GN=Ppp4r2 P	5	11.8	46.448	27.813	3	2	5	4	6	3	1630300	1825500	3050500	3570200	2734600	1264800
sp|Q11011|PSA_MOUSE	sp|Q11011|PSA_MOUSE;tr|F6QYF8|F6QYF8_MOUSE;tr|E9Q039|E9Q039_MOUSE;tr|E9Q6F4|E9Q6F4_MOUSE	>sp|Q11011|PSA_MOUSE Puromycin-sensitive aminopeptidase OS=Mus musculus OX=10090 GN=Npepps PE=1 SV=2;>tr|F6QYF8|F6QYF8_MOUSE Aminopeptidase (Fragment) OS=Mus musculus OX=10090 GN=Npepps PE=1 SV=1;>tr|E9Q039|E9Q039_MOUSE Aminopeptidase OS=Mus musculus OX=10	12	15.3	103.32	39.543	10	8	7	12	8	9	2556200	2184600	1660100	3529900	2527000	2807800
sp|Q11136|PEPD_MOUSE	sp|Q11136|PEPD_MOUSE	>sp|Q11136|PEPD_MOUSE Xaa-Pro dipeptidase OS=Mus musculus OX=10090 GN=Pepd PE=1 SV=3	7	16.4	55.028	18	6	5	6	5	6	9	1942000	2090400	2086200	3302100	1740400	2446800
sp|Q14C51|PTCD3_MOUSE	sp|Q14C51|PTCD3_MOUSE	>sp|Q14C51|PTCD3_MOUSE Pentatricopeptide repeat domain-containing protein 3, mitochondrial OS=Mus musculus OX=10090 GN=Ptcd3 PE=1 SV=2	3	5.8	77.795	7.4845	2	1	1	2	0	1	200500	218000	388950	316580	266280	467780
tr|H3BKN0|H3BKN0_MOUSE	tr|H3BKN0|H3BKN0_MOUSE;sp|Q1HFZ0|NSUN2_MOUSE	>tr|H3BKN0|H3BKN0_MOUSE tRNA (cytosine(34)-C(5))-methyltransferase OS=Mus musculus OX=10090 GN=Nsun2 PE=1 SV=1;>sp|Q1HFZ0|NSUN2_MOUSE tRNA (cytosine(34)-C(5))-methyltransferase OS=Mus musculus OX=10090 GN=Nsun2 PE=1 SV=2	8	15.2	81.373	24.629	5	7	7	3	4	5	1278600	1913500	2193600	1667900	1293400	1715000
sp|Q2KHI9|MCM9_MOUSE	sp|Q2KHI9|MCM9_MOUSE	>sp|Q2KHI9|MCM9_MOUSE DNA helicase MCM9 OS=Mus musculus OX=10090 GN=Mcm9 PE=1 SV=2	1	0.6	125.81	2.7034	1	1	1	1	1	1	196650	250920	245790	172200	187860	238880
tr|D3Z7E5|D3Z7E5_MOUSE	tr|D3Z7E5|D3Z7E5_MOUSE;sp|Q2NL51|GSK3A_MOUSE	>tr|D3Z7E5|D3Z7E5_MOUSE Glycogen synthase kinase-3 alpha OS=Mus musculus OX=10090 GN=Gsk3a PE=1 SV=1;>sp|Q2NL51|GSK3A_MOUSE Glycogen synthase kinase-3 alpha OS=Mus musculus OX=10090 GN=Gsk3a PE=1 SV=2	1	2.9	51.245	4.1164	1	0	0	0	1	1	460940	411390	0	533540	388880	687210
tr|V9GX42|V9GX42_MOUSE	tr|V9GX42|V9GX42_MOUSE;sp|Q2VPQ9|EAF6_MOUSE	>tr|V9GX42|V9GX42_MOUSE Chromatin modification-related protein MEAF6 OS=Mus musculus OX=10090 GN=Meaf6 PE=1 SV=1;>sp|Q2VPQ9|EAF6_MOUSE Chromatin modification-related protein MEAF6 OS=Mus musculus OX=10090 GN=Meaf6 PE=1 SV=1	3	24.9	20.518	8.2663	1	2	3	5	3	4	4380900	5434900	4070200	11025000	12779000	15853000
sp|Q3B7Z2|OSBP1_MOUSE	sp|Q3B7Z2|OSBP1_MOUSE	>sp|Q3B7Z2|OSBP1_MOUSE Oxysterol-binding protein 1 OS=Mus musculus OX=10090 GN=Osbp PE=1 SV=3	3	7.3	88.796	13.218	1	1	4	2	2	2	296190	522050	526740	806420	445780	804210
sp|Q3SXD3|HDDC2_MOUSE	sp|Q3SXD3|HDDC2_MOUSE;tr|E0CYK6|E0CYK6_MOUSE	>sp|Q3SXD3|HDDC2_MOUSE HD domain-containing protein 2 OS=Mus musculus OX=10090 GN=Hddc2 PE=1 SV=1;>tr|E0CYK6|E0CYK6_MOUSE HD domain-containing protein 2 (Fragment) OS=Mus musculus OX=10090 GN=Hddc2 PE=1 SV=2	4	23.1	22.753	10.668	4	4	4	4	1	2	7506900	6504100	5500800	5864600	2332700	3684900
sp|Q62293|TGTP1_MOUSE	sp|Q62293|TGTP1_MOUSE;sp|Q3T9E4|TGTP2_MOUSE;tr|Q5SVP4|Q5SVP4_MOUSE	>sp|Q62293|TGTP1_MOUSE T-cell-specific guanine nucleotide triphosphate-binding protein 1 OS=Mus musculus OX=10090 GN=Tgtp1 PE=1 SV=1;>sp|Q3T9E4|TGTP2_MOUSE T-cell-specific guanine nucleotide triphosphate-binding protein 2 OS=Mus musculus OX=10090 GN=Tgtp2	7	20	47.12	24.068	4	4	5	4	6	6	7249500	10428000	6781900	10114000	6098300	9212500
tr|D3Z665|D3Z665_MOUSE	tr|D3Z665|D3Z665_MOUSE;sp|Q3TAS6|EMC10_MOUSE;tr|A0A0X1KG66|A0A0X1KG66_MOUSE;tr|A0A0X1KG67|A0A0X1KG67_MOUSE	>tr|D3Z665|D3Z665_MOUSE ER membrane protein complex subunit 10 (Fragment) OS=Mus musculus OX=10090 GN=Emc10 PE=1 SV=2;>sp|Q3TAS6|EMC10_MOUSE ER membrane protein complex subunit 10 OS=Mus musculus OX=10090 GN=Emc10 PE=2 SV=2;>tr|A0A0X1KG66|A0A0X1KG66_MOUSE	1	7.6	23.603	2.768	0	0	0	1	0	0	0	0	0	694490	401360	0
sp|Q3TBT3|STING_MOUSE	sp|Q3TBT3|STING_MOUSE	>sp|Q3TBT3|STING_MOUSE Stimulator of interferon genes protein OS=Mus musculus OX=10090 GN=Tmem173 PE=1 SV=2	2	6.9	42.829	8.0321	1	0	1	0	1	1	234590	549340	586240	963820	208740	715840
tr|A0A0R4J094|A0A0R4J094_MOUSE	tr|A0A0R4J094|A0A0R4J094_MOUSE;sp|Q3TC72|FAHD2_MOUSE	>tr|A0A0R4J094|A0A0R4J094_MOUSE Fumarylacetoacetate hydrolase domain-containing 2A OS=Mus musculus OX=10090 GN=Fahd2a PE=1 SV=1;>sp|Q3TC72|FAHD2_MOUSE Fumarylacetoacetate hydrolase domain-containing protein 2A OS=Mus musculus OX=10090 GN=Fahd2 PE=1 SV=1	2	9.9	34.676	7.2432	0	3	2	2	1	1	383630	553010	558560	1563400	0	769850
sp|Q3TC93|H1BP3_MOUSE	sp|Q3TC93|H1BP3_MOUSE;tr|A0A1W2P6R8|A0A1W2P6R8_MOUSE	>sp|Q3TC93|H1BP3_MOUSE HCLS1-binding protein 3 OS=Mus musculus OX=10090 GN=Hs1bp3 PE=1 SV=2;>tr|A0A1W2P6R8|A0A1W2P6R8_MOUSE HCLS1-binding protein 3 (Fragment) OS=Mus musculus OX=10090 GN=Hs1bp3 PE=1 SV=1	3	9.6	43.691	9.3908	3	3	2	1	1	2	360250	657770	352800	507700	557150	553400
sp|Q3TCN2|PLBL2_MOUSE	sp|Q3TCN2|PLBL2_MOUSE	>sp|Q3TCN2|PLBL2_MOUSE Putative phospholipase B-like 2 OS=Mus musculus OX=10090 GN=Plbd2 PE=1 SV=2	1	2.5	66.289	3.4235	1	0	0	0	1	0	0	0	0	0	0	0
tr|Z4YKB8|Z4YKB8_MOUSE	tr|Z4YKB8|Z4YKB8_MOUSE;sp|Q3TEA8|HP1B3_MOUSE;tr|Z4YKA3|Z4YKA3_MOUSE;tr|A2AM70|A2AM70_MOUSE;tr|A2AM62|A2AM62_MOUSE;tr|A2AM63|A2AM63_MOUSE	>tr|Z4YKB8|Z4YKB8_MOUSE Heterochromatin protein 1-binding protein 3 OS=Mus musculus OX=10090 GN=Hp1bp3 PE=1 SV=1;>sp|Q3TEA8|HP1B3_MOUSE Heterochromatin protein 1-binding protein 3 OS=Mus musculus OX=10090 GN=Hp1bp3 PE=1 SV=1;>tr|Z4YKA3|Z4YKA3_MOUSE Heteroc	4	8.8	60.85	15.154	8	4	6	1	1	0	3868900	4294900	4262300	1605600	1924100	0
sp|Q3TGF2|F107B_MOUSE	sp|Q3TGF2|F107B_MOUSE;tr|H9H9T1|H9H9T1_MOUSE;tr|A0A2I3BR29|A0A2I3BR29_MOUSE;tr|H3BLM7|H3BLM7_MOUSE	>sp|Q3TGF2|F107B_MOUSE Protein FAM107B OS=Mus musculus OX=10090 GN=Fam107b PE=1 SV=2;>tr|H9H9T1|H9H9T1_MOUSE Protein FAM107B OS=Mus musculus OX=10090 GN=Fam107b PE=1 SV=1;>tr|A0A2I3BR29|A0A2I3BR29_MOUSE Protein FAM107B OS=Mus musculus OX=10090 GN=Fam107b P	10	51.1	15.572	110.41	14	13	18	27	19	20	84061000	119020000	107380000	146260000	114010000	105510000
sp|Q3TGW2|EEPD1_MOUSE	sp|Q3TGW2|EEPD1_MOUSE	>sp|Q3TGW2|EEPD1_MOUSE Endonuclease/exonuclease/phosphatase family domain-containing protein 1 OS=Mus musculus OX=10090 GN=Eepd1 PE=1 SV=1	1	2.3	62.953	3.0718	1	1	1	1	1	1	1801500	2142900	2504300	2092300	2633100	2667400
sp|Q3THE2|ML12B_MOUSE	sp|Q3THE2|ML12B_MOUSE	>sp|Q3THE2|ML12B_MOUSE Myosin regulatory light chain 12B OS=Mus musculus OX=10090 GN=Myl12b PE=1 SV=2	1	62.8	19.779	7.0587	0	1	0	4	2	2	1092500	2778000	988090	4438800	2191600	2430400
sp|Q3THG9|AASD1_MOUSE	sp|Q3THG9|AASD1_MOUSE;tr|A2A4P3|A2A4P3_MOUSE;tr|A2A4P4|A2A4P4_MOUSE	>sp|Q3THG9|AASD1_MOUSE Alanyl-tRNA editing protein Aarsd1 OS=Mus musculus OX=10090 GN=Aarsd1 PE=1 SV=2;>tr|A2A4P3|A2A4P3_MOUSE Predicted gene, 27029 OS=Mus musculus OX=10090 GN=Gm27029 PE=4 SV=1;>tr|A2A4P4|A2A4P4_MOUSE Predicted gene, 27029 OS=Mus musculus	6	22.3	44.97	14.698	6	1	3	2	4	2	838290	1013500	895710	1747100	1339400	1796100
sp|Q3THJ3|EIF1A_MOUSE	sp|Q3THJ3|EIF1A_MOUSE	>sp|Q3THJ3|EIF1A_MOUSE Probable RNA-binding protein EIF1AD OS=Mus musculus OX=10090 GN=Eif1ad PE=1 SV=2	2	14.1	19.52	3.9577	0	0	1	3	1	0	0	0	0	1534200	1175300	1432300
sp|Q3THK3|T2FA_MOUSE	sp|Q3THK3|T2FA_MOUSE	>sp|Q3THK3|T2FA_MOUSE General transcription factor IIF subunit 1 OS=Mus musculus OX=10090 GN=Gtf2f1 PE=1 SV=2	8	19.3	57.241	110.34	8	7	9	10	8	5	12465000	13540000	13344000	16248000	15268000	18070000
sp|Q3THK7|GUAA_MOUSE	sp|Q3THK7|GUAA_MOUSE	>sp|Q3THK7|GUAA_MOUSE GMP synthase [glutamine-hydrolyzing] OS=Mus musculus OX=10090 GN=Gmps PE=1 SV=2	5	9.4	76.723	18.911	4	6	6	3	4	6	1400600	2588700	2170800	1988100	2096000	3111400
tr|A0A0U1RNT6|A0A0U1RNT6_MOUSE	tr|A0A0U1RNT6|A0A0U1RNT6_MOUSE;tr|A0A0U1RNK6|A0A0U1RNK6_MOUSE;sp|Q3THS6|METK2_MOUSE	>tr|A0A0U1RNT6|A0A0U1RNT6_MOUSE S-adenosylmethionine synthase OS=Mus musculus OX=10090 GN=Mat2a PE=1 SV=1;>tr|A0A0U1RNK6|A0A0U1RNK6_MOUSE S-adenosylmethionine synthase OS=Mus musculus OX=10090 GN=Mat2a PE=1 SV=1;>sp|Q3THS6|METK2_MOUSE S-adenosylmethionine	8	27.6	39.738	93.895	11	10	11	11	9	8	13556000	18667000	15170000	21428000	18171000	17443000
sp|Q3TIR3|RIC8A_MOUSE	sp|Q3TIR3|RIC8A_MOUSE;tr|A0A1B0GS30|A0A1B0GS30_MOUSE;tr|A0A1B0GSI8|A0A1B0GSI8_MOUSE;sp|Q80XE1|RIC8B_MOUSE	>sp|Q3TIR3|RIC8A_MOUSE Synembryn-A OS=Mus musculus OX=10090 GN=Ric8a PE=1 SV=2;>tr|A0A1B0GS30|A0A1B0GS30_MOUSE Synembryn-A OS=Mus musculus OX=10090 GN=Ric8a PE=1 SV=1;>tr|A0A1B0GSI8|A0A1B0GSI8_MOUSE Synembryn-A (Fragment) OS=Mus musculus OX=10090 GN=Ric8a	2	6.2	59.846	6.3916	1	0	0	0	1	0	349720	137490	220370	267070	205620	314390
sp|Q3TIU4|PDE12_MOUSE	sp|Q3TIU4|PDE12_MOUSE	>sp|Q3TIU4|PDE12_MOUSE 2,5-phosphodiesterase 12 OS=Mus musculus OX=10090 GN=Pde12 PE=1 SV=2	3	7.2	67.513	7.1625	0	0	3	1	2	0	78944	579280	963330	700260	477860	367740
sp|Q3TIV5|ZC3HF_MOUSE	sp|Q3TIV5|ZC3HF_MOUSE	>sp|Q3TIV5|ZC3HF_MOUSE Zinc finger CCCH domain-containing protein 15 OS=Mus musculus OX=10090 GN=Zc3h15 PE=1 SV=2	2	7.3	48.327	5.3798	0	1	0	2	0	0	193520	457210	457110	236860	241380	460410
sp|Q3TKT4|SMCA4_MOUSE	sp|Q3TKT4|SMCA4_MOUSE;tr|A0A0R4J170|A0A0R4J170_MOUSE;tr|G3UX35|G3UX35_MOUSE	>sp|Q3TKT4|SMCA4_MOUSE Transcription activator BRG1 OS=Mus musculus OX=10090 GN=Smarca4 PE=1 SV=1;>tr|A0A0R4J170|A0A0R4J170_MOUSE Transcription activator BRG1 OS=Mus musculus OX=10090 GN=Smarca4 PE=1 SV=1;>tr|G3UX35|G3UX35_MOUSE Transcription activator BRG	3	2.2	181.43	5.6186	2	1	3	0	3	0	427030	0	128220	90593	147260	229340
sp|Q3TKY6|CWC27_MOUSE	sp|Q3TKY6|CWC27_MOUSE	>sp|Q3TKY6|CWC27_MOUSE Spliceosome-associated protein CWC27 homolog OS=Mus musculus OX=10090 GN=Cwc27 PE=1 SV=1	5	19.2	53.542	14.391	2	2	4	8	1	4	1714500	2136400	2713500	3463200	1513800	2853100
tr|S4R294|S4R294_MOUSE	tr|S4R294|S4R294_MOUSE;tr|S4R2J9|S4R2J9_MOUSE;tr|A0A0A0MQ79|A0A0A0MQ79_MOUSE;sp|Q3TLH4|PRC2C_MOUSE	>tr|S4R294|S4R294_MOUSE Protein PRRC2C OS=Mus musculus OX=10090 GN=Prrc2c PE=1 SV=1;>tr|S4R2J9|S4R2J9_MOUSE Protein PRRC2C OS=Mus musculus OX=10090 GN=Prrc2c PE=1 SV=1;>tr|A0A0A0MQ79|A0A0A0MQ79_MOUSE Protein PRRC2C OS=Mus musculus OX=10090 GN=Prrc2c PE=1 S	7	4	298.11	23.195	5	2	6	3	8	5	396170	507120	434680	574770	622740	427630
sp|Q3TQI7|TLS1_MOUSE	sp|Q3TQI7|TLS1_MOUSE	>sp|Q3TQI7|TLS1_MOUSE Telomere length and silencing protein 1 homolog OS=Mus musculus OX=10090 PE=1 SV=2	1	4.2	33.543	5.253	2	1	3	2	2	2	816020	600150	1240500	2176600	1726900	738460
tr|D6RGT1|D6RGT1_MOUSE	tr|D6RGT1|D6RGT1_MOUSE;tr|G3UWL8|G3UWL8_MOUSE;tr|G5E881|G5E881_MOUSE;sp|Q3TUH1|TAM41_MOUSE	>tr|D6RGT1|D6RGT1_MOUSE Phosphatidate cytidylyltransferase, mitochondrial OS=Mus musculus OX=10090 GN=Tamm41 PE=1 SV=1;>tr|G3UWL8|G3UWL8_MOUSE Phosphatidate cytidylyltransferase, mitochondrial (Fragment) OS=Mus musculus OX=10090 GN=Tamm41 PE=1 SV=8;>tr|G5E	1	8.7	16.254	4.3886	1	0	1	1	0	1	0	0	1829900	0	0	0
sp|Q3TW96|UAP1L_MOUSE	sp|Q3TW96|UAP1L_MOUSE	>sp|Q3TW96|UAP1L_MOUSE UDP-N-acetylhexosamine pyrophosphorylase-like protein 1 OS=Mus musculus OX=10090 GN=Uap1l1 PE=1 SV=1	3	8.9	56.613	19.008	4	3	4	2	4	4	1832600	1707000	1299100	1103800	2163400	1673200
tr|G3X934|G3X934_MOUSE	tr|G3X934|G3X934_MOUSE;sp|Q3TWF6|WDR70_MOUSE	>tr|G3X934|G3X934_MOUSE MCG115964 OS=Mus musculus OX=10090 GN=Wdr70 PE=1 SV=1;>sp|Q3TWF6|WDR70_MOUSE WD repeat-containing protein 70 OS=Mus musculus OX=10090 GN=Wdr70 PE=1 SV=1	2	3.7	73.06	5.7727	0	2	0	0	0	0	0	0	0	0	0	0
sp|Q3TWW8|SRSF6_MOUSE	sp|Q3TWW8|SRSF6_MOUSE;tr|A0A0A6YXX6|A0A0A6YXX6_MOUSE	>sp|Q3TWW8|SRSF6_MOUSE Serine/arginine-rich splicing factor 6 OS=Mus musculus OX=10090 GN=Srsf6 PE=1 SV=1;>tr|A0A0A6YXX6|A0A0A6YXX6_MOUSE Serine/arginine-rich-splicing factor 6 OS=Mus musculus OX=10090 GN=Srsf6 PE=1 SV=1	4	13	39.025	11.264	5	3	3	3	4	3	13904000	15405000	10861000	6307600	13217000	11914000
sp|Q3TX51|LRC28_MOUSE	sp|Q3TX51|LRC28_MOUSE;tr|A0A087WQI4|A0A087WQI4_MOUSE;tr|A0A087WP31|A0A087WP31_MOUSE;tr|Q8C1S3|Q8C1S3_MOUSE;tr|Q9D7Y1|Q9D7Y1_MOUSE;tr|A0A087WSB2|A0A087WSB2_MOUSE	>sp|Q3TX51|LRC28_MOUSE Leucine-rich repeat-containing protein 28 OS=Mus musculus OX=10090 GN=Lrrc28 PE=2 SV=1;>tr|A0A087WQI4|A0A087WQI4_MOUSE Leucine rich repeat containing 28, isoform CRA_f OS=Mus musculus OX=10090 GN=Lrrc28 PE=4 SV=1;>tr|A0A087WP31|A0A08	2	7.4	41.735	5.3871	0	1	2	0	1	1	1096700	2576600	2901200	917990	1857100	1445000
sp|Q3TXS7|PSMD1_MOUSE	sp|Q3TXS7|PSMD1_MOUSE	>sp|Q3TXS7|PSMD1_MOUSE 26S proteasome non-ATPase regulatory subunit 1 OS=Mus musculus OX=10090 GN=Psmd1 PE=1 SV=1	12	14.4	105.73	36.5	6	6	5	5	10	6	2076300	1716300	2062900	2841100	2880400	2655000
sp|Q3TYS2|CYBC1_MOUSE	sp|Q3TYS2|CYBC1_MOUSE;tr|E9Q3W5|E9Q3W5_MOUSE;tr|X1WI15|X1WI15_MOUSE;tr|A0A0A0MQK0|A0A0A0MQK0_MOUSE	>sp|Q3TYS2|CYBC1_MOUSE Cytochrome b-245 chaperone 1 OS=Mus musculus OX=10090 GN=Cybc1 PE=1 SV=2;>tr|E9Q3W5|E9Q3W5_MOUSE Cytochrome b-245 chaperone 1 (Fragment) OS=Mus musculus OX=10090 GN=Cybc1 PE=4 SV=1;>tr|X1WI15|X1WI15_MOUSE Cytochrome b-245 chaperone 1	2	9.6	20.921	4.2687	0	0	0	2	0	0	0	0	2432400	1796300	0	0
sp|Q3TYX3|SMYD5_MOUSE	sp|Q3TYX3|SMYD5_MOUSE	>sp|Q3TYX3|SMYD5_MOUSE SET and MYND domain-containing protein 5 OS=Mus musculus OX=10090 GN=Smyd5 PE=1 SV=2	2	6	47.095	6.0179	1	0	0	1	0	1	222100	300480	99903	355830	290670	171620
tr|A0A3B2WCD8|A0A3B2WCD8_MOUSE	tr|A0A3B2WCD8|A0A3B2WCD8_MOUSE;sp|Q3U0V1|FUBP2_MOUSE	>tr|A0A3B2WCD8|A0A3B2WCD8_MOUSE Far upstream element-binding protein 2 OS=Mus musculus OX=10090 GN=Khsrp PE=1 SV=1;>sp|Q3U0V1|FUBP2_MOUSE Far upstream element-binding protein 2 OS=Mus musculus OX=10090 GN=Khsrp PE=1 SV=2	29	54.8	74.252	323.31	49	63	68	66	71	60	81546000	113620000	79474000	106510000	111520000	103190000
sp|Q3U0V2|TRADD_MOUSE	sp|Q3U0V2|TRADD_MOUSE	>sp|Q3U0V2|TRADD_MOUSE Tumor necrosis factor receptor type 1-associated DEATH domain protein OS=Mus musculus OX=10090 GN=Tradd PE=1 SV=1	3	16.5	34.577	12.32	2	2	3	4	2	2	1873900	1435100	1355600	2374500	1586400	1254900
tr|V9GXK6|V9GXK6_MOUSE	tr|V9GXK6|V9GXK6_MOUSE;sp|Q3U182|CRTC2_MOUSE	>tr|V9GXK6|V9GXK6_MOUSE CREB-regulated transcription coactivator 2 (Fragment) OS=Mus musculus OX=10090 GN=Crtc2 PE=1 SV=1;>sp|Q3U182|CRTC2_MOUSE CREB-regulated transcription coactivator 2 OS=Mus musculus OX=10090 GN=Crtc2 PE=1 SV=2	2	5.9	50.386	3.495	0	0	0	1	0	1	506980	139680	172000	387190	705770	653640
sp|Q3U1J4|DDB1_MOUSE	sp|Q3U1J4|DDB1_MOUSE	>sp|Q3U1J4|DDB1_MOUSE DNA damage-binding protein 1 OS=Mus musculus OX=10090 GN=Ddb1 PE=1 SV=2	27	27.9	126.85	127.61	28	30	33	32	29	32	9357700	9229300	10676000	12856000	10951000	13265000
sp|Q3U1Z5|GPSM3_MOUSE	sp|Q3U1Z5|GPSM3_MOUSE	>sp|Q3U1Z5|GPSM3_MOUSE G-protein-signaling modulator 3 OS=Mus musculus OX=10090 GN=Gpsm3 PE=1 SV=2	2	23.3	17.618	21.798	3	2	1	4	3	5	7630900	8365900	7118700	4394000	10698000	10558000
sp|Q3U276|SDHF1_MOUSE	sp|Q3U276|SDHF1_MOUSE	>sp|Q3U276|SDHF1_MOUSE Succinate dehydrogenase assembly factor 1, mitochondrial OS=Mus musculus OX=10090 GN=Sdhaf1 PE=1 SV=1	1	12.7	13.142	2.6731	0	1	0	0	0	1	0	1053100	0	0	815210	862030
sp|Q3U319|BRE1B_MOUSE	sp|Q3U319|BRE1B_MOUSE;tr|A0A0X1KG60|A0A0X1KG60_MOUSE;tr|A0A0U1RPJ4|A0A0U1RPJ4_MOUSE	>sp|Q3U319|BRE1B_MOUSE E3 ubiquitin-protein ligase BRE1B OS=Mus musculus OX=10090 GN=Rnf40 PE=1 SV=2;>tr|A0A0X1KG60|A0A0X1KG60_MOUSE E3 ubiquitin protein ligase OS=Mus musculus OX=10090 GN=Rnf40 PE=1 SV=1;>tr|A0A0U1RPJ4|A0A0U1RPJ4_MOUSE E3 ubiquitin protei	5	7.4	113.97	10.308	1	0	2	2	1	1	249270	509280	406770	148370	393730	643120
sp|Q3U5Q7|CMPK2_MOUSE	sp|Q3U5Q7|CMPK2_MOUSE	>sp|Q3U5Q7|CMPK2_MOUSE UMP-CMP kinase 2, mitochondrial OS=Mus musculus OX=10090 GN=Cmpk2 PE=1 SV=2	3	7.6	50.036	7.6114	3	1	1	1	0	0	678910	710440	230840	483140	547200	509010
sp|Q3U7R1|ESYT1_MOUSE	sp|Q3U7R1|ESYT1_MOUSE	>sp|Q3U7R1|ESYT1_MOUSE Extended synaptotagmin-1 OS=Mus musculus OX=10090 GN=Esyt1 PE=1 SV=2	21	27.9	121.55	88.87	10	10	9	20	13	15	3147500	3482000	3134300	4853200	4690900	5343100
sp|Q3U821|WDR75_MOUSE	sp|Q3U821|WDR75_MOUSE	>sp|Q3U821|WDR75_MOUSE WD repeat-containing protein 75 OS=Mus musculus OX=10090 GN=Wdr75 PE=1 SV=1	3	4.8	94.036	10.401	0	1	1	1	0	2	237670	152890	236730	178270	179880	493200
sp|Q3U9G9|LBR_MOUSE	sp|Q3U9G9|LBR_MOUSE;tr|A0A0A6YXW3|A0A0A6YXW3_MOUSE;tr|A0A0A6YXT6|A0A0A6YXT6_MOUSE;tr|A0A0A6YW01|A0A0A6YW01_MOUSE	>sp|Q3U9G9|LBR_MOUSE Delta(14)-sterol reductase OS=Mus musculus OX=10090 GN=Lbr PE=1 SV=2;>tr|A0A0A6YXW3|A0A0A6YXW3_MOUSE Delta(14)-sterol reductase (Fragment) OS=Mus musculus OX=10090 GN=Lbr PE=1 SV=1;>tr|A0A0A6YXT6|A0A0A6YXT6_MOUSE Delta(14)-sterol reduc	3	4.6	71.439	6.2091	0	0	2	0	1	0	0	0	2112400	1028200	834140	953070
tr|G3X8R5|G3X8R5_MOUSE	tr|G3X8R5|G3X8R5_MOUSE;sp|Q3UA37|QRIC1_MOUSE;tr|Q8BUN3|Q8BUN3_MOUSE	>tr|G3X8R5|G3X8R5_MOUSE Glutamine-rich protein 1 OS=Mus musculus OX=10090 GN=Qrich1 PE=1 SV=1;>sp|Q3UA37|QRIC1_MOUSE Glutamine-rich protein 1 OS=Mus musculus OX=10090 GN=Qrich1 PE=1 SV=1;>tr|Q8BUN3|Q8BUN3_MOUSE Glutamine-rich protein 1 OS=Mus musculus OX=1	4	7.2	86.528	9.4212	2	2	4	3	2	3	1262600	1257000	1428800	671820	1610000	2078600
tr|A0A1L1STM2|A0A1L1STM2_MOUSE	tr|A0A1L1STM2|A0A1L1STM2_MOUSE;sp|Q3UB74|TBRG1_MOUSE	>tr|A0A1L1STM2|A0A1L1STM2_MOUSE Transforming growth factor beta regulator 1 OS=Mus musculus OX=10090 GN=Tbrg1 PE=1 SV=1;>sp|Q3UB74|TBRG1_MOUSE Transforming growth factor beta regulator 1 OS=Mus musculus OX=10090 GN=Tbrg1 PE=1 SV=2	1	5.5	22.061	3.4479	1	0	1	0	0	1	898300	0	715510	0	0	0
tr|A0A2I3BRS5|A0A2I3BRS5_MOUSE	tr|A0A2I3BRS5|A0A2I3BRS5_MOUSE;sp|Q3UCV8|OTUL_MOUSE	>tr|A0A2I3BRS5|A0A2I3BRS5_MOUSE Ubiquitin thioesterase otulin (Fragment) OS=Mus musculus OX=10090 GN=Otulin PE=1 SV=1;>sp|Q3UCV8|OTUL_MOUSE Ubiquitin thioesterase otulin OS=Mus musculus OX=10090 GN=Otulin PE=1 SV=1	1	7.1	17.093	3.2232	0	0	0	0	1	0	388580	1171100	860920	1150800	1091700	1778000
sp|Q3UDE2|TTL12_MOUSE	sp|Q3UDE2|TTL12_MOUSE	>sp|Q3UDE2|TTL12_MOUSE Tubulin--tyrosine ligase-like protein 12 OS=Mus musculus OX=10090 GN=Ttll12 PE=1 SV=1	7	12.4	74.042	17.103	5	4	5	4	5	4	1046900	777450	632650	1420100	1112000	1498700
sp|Q3UE37|UBE2Z_MOUSE	sp|Q3UE37|UBE2Z_MOUSE	>sp|Q3UE37|UBE2Z_MOUSE Ubiquitin-conjugating enzyme E2 Z OS=Mus musculus OX=10090 GN=Ube2z PE=1 SV=2	3	11.8	38.368	13.723	1	1	2	3	1	2	630820	1624900	1579900	2281300	1050000	2111400
sp|Q3UEB3|PUF60_MOUSE	sp|Q3UEB3|PUF60_MOUSE	>sp|Q3UEB3|PUF60_MOUSE Poly(U)-binding-splicing factor PUF60 OS=Mus musculus OX=10090 GN=Puf60 PE=1 SV=2	16	37.6	60.248	103.93	15	23	18	29	23	22	30530000	26011000	22896000	43351000	36241000	34027000
sp|Q3UFK8|FRMD8_MOUSE	sp|Q3UFK8|FRMD8_MOUSE	>sp|Q3UFK8|FRMD8_MOUSE FERM domain-containing protein 8 OS=Mus musculus OX=10090 GN=Frmd8 PE=1 SV=2	4	10.7	51.827	11.075	0	0	0	2	3	2	0	0	0	368320	725590	777490
sp|Q3UFS4|GPT11_MOUSE	sp|Q3UFS4|GPT11_MOUSE;tr|A0A0R4J215|A0A0R4J215_MOUSE	>sp|Q3UFS4|GPT11_MOUSE G patch domain-containing protein 11 OS=Mus musculus OX=10090 GN=Gpatch11 PE=1 SV=2;>tr|A0A0R4J215|A0A0R4J215_MOUSE G patch domain-containing protein 11 OS=Mus musculus OX=10090 GN=Gpatch11 PE=1 SV=1	1	5.3	30.608	3.1309	1	0	0	0	1	0	1324700	1484600	0	0	2781500	1751400
sp|Q3UFY7|5NT3B_MOUSE	sp|Q3UFY7|5NT3B_MOUSE;tr|A0A0R4J146|A0A0R4J146_MOUSE	>sp|Q3UFY7|5NT3B_MOUSE 7-methylguanosine phosphate-specific 5-nucleotidase OS=Mus musculus OX=10090 GN=Nt5c3b PE=1 SV=3;>tr|A0A0R4J146|A0A0R4J146_MOUSE 5-nucleotidase OS=Mus musculus OX=10090 GN=Nt5c3b PE=1 SV=1	5	19.3	34.425	18.795	4	4	4	4	4	4	2645800	2813900	2430800	2676900	2960600	2159000
sp|Q3UGC7|EI3JA_MOUSE	sp|Q3UGC7|EI3JA_MOUSE;sp|Q66JS6|EI3JB_MOUSE	>sp|Q3UGC7|EI3JA_MOUSE Eukaryotic translation initiation factor 3 subunit J-A OS=Mus musculus OX=10090 GN=Eif3j1 PE=2 SV=1;>sp|Q66JS6|EI3JB_MOUSE Eukaryotic translation initiation factor 3 subunit J-B OS=Mus musculus OX=10090 GN=Eif3j2 PE=1 SV=1	9	36	29.343	73.575	8	10	9	9	10	12	15220000	25572000	12592000	19276000	13671000	21889000
sp|Q3UGS4|MCRI1_MOUSE	sp|Q3UGS4|MCRI1_MOUSE	>sp|Q3UGS4|MCRI1_MOUSE Mapk-regulated corepressor-interacting protein 1 OS=Mus musculus OX=10090 GN=Mcrip1 PE=1 SV=1	2	29.9	11.101	18.539	1	1	1	2	2	1	2635600	1504100	3224500	2420000	3002100	3954500
sp|Q3UHJ0|AAK1_MOUSE	sp|Q3UHJ0|AAK1_MOUSE	>sp|Q3UHJ0|AAK1_MOUSE AP2-associated protein kinase 1 OS=Mus musculus OX=10090 GN=Aak1 PE=1 SV=2	15	28.2	103.35	81.887	11	15	18	22	16	22	7097500	9699100	6806100	12615000	8909100	9791000
sp|Q3UHX2|HAP28_MOUSE	sp|Q3UHX2|HAP28_MOUSE	>sp|Q3UHX2|HAP28_MOUSE 28 kDa heat- and acid-stable phosphoprotein OS=Mus musculus OX=10090 GN=Pdap1 PE=1 SV=1	5	22.7	20.605	32.46	7	9	6	5	8	8	29738000	36573000	31352000	36485000	46493000	51038000
sp|Q3UI43|BABA1_MOUSE	sp|Q3UI43|BABA1_MOUSE	>sp|Q3UI43|BABA1_MOUSE BRISC and BRCA1-A complex member 1 OS=Mus musculus OX=10090 GN=Babam1 PE=1 SV=1	3	18.9	36.793	11.415	5	3	6	6	7	3	1508500	3923500	2976100	4169400	3240900	3386100
sp|Q3UIA2|RHG17_MOUSE	sp|Q3UIA2|RHG17_MOUSE;tr|A0A0U1RNM6|A0A0U1RNM6_MOUSE;tr|E9QAJ9|E9QAJ9_MOUSE	>sp|Q3UIA2|RHG17_MOUSE Rho GTPase-activating protein 17 OS=Mus musculus OX=10090 GN=Arhgap17 PE=1 SV=1;>tr|A0A0U1RNM6|A0A0U1RNM6_MOUSE Rho GTPase-activating protein 17 OS=Mus musculus OX=10090 GN=Arhgap17 PE=1 SV=1;>tr|E9QAJ9|E9QAJ9_MOUSE Rho GTPase-activa	2	3.1	92.201	4.1881	1	1	1	0	1	1	94503	94471	99216	0	94107	158460
sp|Q3UIR3|DTX3L_MOUSE	sp|Q3UIR3|DTX3L_MOUSE	>sp|Q3UIR3|DTX3L_MOUSE E3 ubiquitin-protein ligase DTX3L OS=Mus musculus OX=10090 GN=Dtx3l PE=1 SV=1	2	4.4	83.043	4.0072	2	4	2	1	2	1	178790	217450	157080	176260	197010	73375
tr|A0A0A6YWN9|A0A0A6YWN9_MOUSE	tr|A0A0A6YWN9|A0A0A6YWN9_MOUSE;tr|E9Q9M5|E9Q9M5_MOUSE;tr|A0A0A6YWX1|A0A0A6YWX1_MOUSE;tr|J3KMM1|J3KMM1_MOUSE;sp|Q3UJD6|UBP19_MOUSE	>tr|A0A0A6YWN9|A0A0A6YWN9_MOUSE Ubiquitin carboxyl-terminal hydrolase 19 (Fragment) OS=Mus musculus OX=10090 GN=Usp19 PE=1 SV=1;>tr|E9Q9M5|E9Q9M5_MOUSE Ubiquitin carboxyl-terminal hydrolase 19 OS=Mus musculus OX=10090 GN=Usp19 PE=1 SV=1;>tr|A0A0A6YWX1|A0A0	2	4.7	110.47	2.9838	0	0	0	1	0	1	30001	0	148460	36978	0	148620
sp|Q3UKC1|TAXB1_MOUSE	sp|Q3UKC1|TAXB1_MOUSE	>sp|Q3UKC1|TAXB1_MOUSE Tax1-binding protein 1 homolog OS=Mus musculus OX=10090 GN=Tax1bp1 PE=1 SV=2	2	3.9	93.629	5.8069	0	3	2	1	0	3	0	288110	225850	152000	0	287800
sp|Q3UKJ7|SMU1_MOUSE	sp|Q3UKJ7|SMU1_MOUSE	>sp|Q3UKJ7|SMU1_MOUSE WD40 repeat-containing protein SMU1 OS=Mus musculus OX=10090 GN=Smu1 PE=2 SV=2	11	23.8	57.543	63.498	13	12	14	15	16	15	5496100	7390800	6110100	11977000	7639800	10074000
sp|Q3ULD5|MCCB_MOUSE	sp|Q3ULD5|MCCB_MOUSE	>sp|Q3ULD5|MCCB_MOUSE Methylcrotonoyl-CoA carboxylase beta chain, mitochondrial OS=Mus musculus OX=10090 GN=Mccc2 PE=1 SV=1	1	2.3	61.378	3.166	1	0	0	2	1	1	150790	185540	165550	169630	266510	258010
sp|Q3ULW8|PARP3_MOUSE	sp|Q3ULW8|PARP3_MOUSE	>sp|Q3ULW8|PARP3_MOUSE Protein mono-ADP-ribosyltransferase PARP3 OS=Mus musculus OX=10090 GN=Parp3 PE=2 SV=1	10	27.2	59.948	37.796	8	12	10	7	5	8	3901500	5133400	4245500	5279700	3457900	4418000
sp|Q3UM45|PP1R7_MOUSE	sp|Q3UM45|PP1R7_MOUSE	>sp|Q3UM45|PP1R7_MOUSE Protein phosphatase 1 regulatory subunit 7 OS=Mus musculus OX=10090 GN=Ppp1r7 PE=1 SV=2	13	48.2	41.291	95.571	10	11	9	14	12	10	9627400	10733000	9952100	13466000	10460000	13604000
tr|D3Z0U5|D3Z0U5_MOUSE	tr|D3Z0U5|D3Z0U5_MOUSE;tr|D6RGM7|D6RGM7_MOUSE;tr|D3Z4J2|D3Z4J2_MOUSE;sp|Q9D3R6|KATL2_MOUSE;tr|A0A0G2JFY0|A0A0G2JFY0_MOUSE;tr|A0A0A0MQ80|A0A0A0MQ80_MOUSE;sp|Q3UMC0|AFG2H_MOUSE	>tr|D3Z0U5|D3Z0U5_MOUSE Katanin p60 ATPase-containing subunit A-like 2 OS=Mus musculus OX=10090 GN=Katnal2 PE=4 SV=1;>tr|D6RGM7|D6RGM7_MOUSE Katanin p60 ATPase-containing subunit A-like 2 OS=Mus musculus OX=10090 GN=Katnal2 PE=1 SV=1;>tr|D3Z4J2|D3Z4J2_MOUS	1	4.3	31.2	5.0458	2	2	2	1	2	2	21140000	10621000	11415000	14817000	15454000	14460000
sp|Q3UMQ8|NAF1_MOUSE	sp|Q3UMQ8|NAF1_MOUSE;tr|E9QJT2|E9QJT2_MOUSE	>sp|Q3UMQ8|NAF1_MOUSE H/ACA ribonucleoprotein complex non-core subunit NAF1 OS=Mus musculus OX=10090 GN=Naf1 PE=1 SV=2;>tr|E9QJT2|E9QJT2_MOUSE H/ACA ribonucleoprotein complex non-core subunit NAF1 OS=Mus musculus OX=10090 GN=Naf1 PE=1 SV=1	1	2.9	53.245	3.8153	1	2	0	1	0	0	859440	974280	0	733180	0	0
sp|Q3UMU9|HDGR2_MOUSE	sp|Q3UMU9|HDGR2_MOUSE	>sp|Q3UMU9|HDGR2_MOUSE Hepatoma-derived growth factor-related protein 2 OS=Mus musculus OX=10090 GN=Hdgfl2 PE=1 SV=1	6	11.1	74.29	44.324	8	7	7	7	5	8	5402100	5210400	5511200	8519800	6121600	7038600
sp|Q3UMW7|MAPK3_MOUSE	sp|Q3UMW7|MAPK3_MOUSE	>sp|Q3UMW7|MAPK3_MOUSE MAP kinase-activated protein kinase 3 OS=Mus musculus OX=10090 GN=Mapkapk3 PE=1 SV=2	3	11.5	43.293	9.8743	2	4	2	3	3	3	1039500	1741700	436260	802470	651460	2607000
tr|A7ISP9|A7ISP9_MOUSE	tr|A7ISP9|A7ISP9_MOUSE;tr|F8WJ93|F8WJ93_MOUSE;sp|Q3UMY5|EMAL4_MOUSE;tr|A0A0R4J0H0|A0A0R4J0H0_MOUSE;tr|A0A0R4J1G7|A0A0R4J1G7_MOUSE;tr|A0A3Q4EHV9|A0A3Q4EHV9_MOUSE	>tr|A7ISP9|A7ISP9_MOUSE EMAP-like protein 4 OS=Mus musculus OX=10090 GN=Eml4 PE=2 SV=1;>tr|F8WJ93|F8WJ93_MOUSE Echinoderm microtubule-associated protein-like 4 OS=Mus musculus OX=10090 GN=Eml4 PE=1 SV=1;>sp|Q3UMY5|EMAL4_MOUSE Echinoderm microtubule-associa	3	3.3	108.71	9.4357	1	2	2	1	2	2	350720	377480	454620	635290	527260	466690
tr|A0A0N4SVW8|A0A0N4SVW8_MOUSE	tr|A0A0N4SVW8|A0A0N4SVW8_MOUSE;sp|Q3UND0|SKAP2_MOUSE	>tr|A0A0N4SVW8|A0A0N4SVW8_MOUSE Src kinase-associated phosphoprotein 2 (Fragment) OS=Mus musculus OX=10090 GN=Skap2 PE=1 SV=3;>sp|Q3UND0|SKAP2_MOUSE Src kinase-associated phosphoprotein 2 OS=Mus musculus OX=10090 GN=Skap2 PE=1 SV=2	1	7.9	14.566	2.6208	0	0	0	0	0	1	754920	649990	760600	576520	687630	790140
sp|Q3UPF5|ZCCHV_MOUSE	sp|Q3UPF5|ZCCHV_MOUSE;tr|D3Z5I1|D3Z5I1_MOUSE;tr|G3X9X5|G3X9X5_MOUSE	>sp|Q3UPF5|ZCCHV_MOUSE Zinc finger CCCH-type antiviral protein 1 OS=Mus musculus OX=10090 GN=Zc3hav1 PE=1 SV=1;>tr|D3Z5I1|D3Z5I1_MOUSE Zinc finger CCCH-type antiviral protein 1 OS=Mus musculus OX=10090 GN=Zc3hav1 PE=1 SV=1;>tr|G3X9X5|G3X9X5_MOUSE Zinc fing	5	7.8	106.69	20.032	4	3	6	7	6	3	1332900	1235200	1487300	1261600	1654200	1594400
sp|Q3UPL0|SC31A_MOUSE	sp|Q3UPL0|SC31A_MOUSE;tr|S4R2A9|S4R2A9_MOUSE	>sp|Q3UPL0|SC31A_MOUSE Protein transport protein Sec31A OS=Mus musculus OX=10090 GN=Sec31a PE=1 SV=2;>tr|S4R2A9|S4R2A9_MOUSE Protein transport protein Sec31A (Fragment) OS=Mus musculus OX=10090 GN=Sec31a PE=1 SV=1	10	10.7	133.57	42.384	11	10	14	10	9	8	1601500	1787700	1819000	2201900	2907500	2725300
tr|E0CZ48|E0CZ48_MOUSE	tr|E0CZ48|E0CZ48_MOUSE;tr|E0CYR4|E0CYR4_MOUSE;sp|Q3UPP8|CEP63_MOUSE	>tr|E0CZ48|E0CZ48_MOUSE Centrosomal protein of 63 kDa (Fragment) OS=Mus musculus OX=10090 GN=Cep63 PE=1 SV=1;>tr|E0CYR4|E0CYR4_MOUSE Centrosomal protein of 63 kDa (Fragment) OS=Mus musculus OX=10090 GN=Cep63 PE=1 SV=1;>sp|Q3UPP8|CEP63_MOUSE Centrosomal pro	1	15.5	7.9319	3.2821	0	1	0	1	0	1	0	418230	0	758380	299300	575400
sp|Q3UQA7|SELH_MOUSE	sp|Q3UQA7|SELH_MOUSE;tr|A0A087WPM0|A0A087WPM0_MOUSE;tr|A0A087WNU1|A0A087WNU1_MOUSE	>sp|Q3UQA7|SELH_MOUSE Selenoprotein H OS=Mus musculus OX=10090 GN=Selenoh PE=1 SV=2;>tr|A0A087WPM0|A0A087WPM0_MOUSE Selenoprotein H OS=Mus musculus OX=10090 GN=Selenoh PE=1 SV=1;>tr|A0A087WNU1|A0A087WNU1_MOUSE Selenoprotein H OS=Mus musculus OX=10090 GN=Se	2	31	12.974	9.866	0	0	2	2	0	0	0	0	0	0	0	0
sp|Q3UQU0|BRD9_MOUSE	sp|Q3UQU0|BRD9_MOUSE;tr|A0A0R4J175|A0A0R4J175_MOUSE	>sp|Q3UQU0|BRD9_MOUSE Bromodomain-containing protein 9 OS=Mus musculus OX=10090 GN=Brd9 PE=1 SV=1;>tr|A0A0R4J175|A0A0R4J175_MOUSE Bromodomain-containing protein 9 OS=Mus musculus OX=10090 GN=Brd9 PE=1 SV=1	1	2	66.839	2.7384	0	0	0	1	0	1	0	0	0	546390	0	0
sp|Q3USH5|SFSWA_MOUSE	sp|Q3USH5|SFSWA_MOUSE	>sp|Q3USH5|SFSWA_MOUSE Splicing factor, suppressor of white-apricot homolog OS=Mus musculus OX=10090 GN=Sfswap PE=1 SV=2	2	2	104.19	3.9329	1	1	0	2	2	1	1544900	1829300	193580	1325300	1546300	1749100
tr|D3Z203|D3Z203_MOUSE	tr|D3Z203|D3Z203_MOUSE;tr|A0A1B0GRC3|A0A1B0GRC3_MOUSE;tr|A0A0R4J1X5|A0A0R4J1X5_MOUSE;tr|A0A0R4J1W0|A0A0R4J1W0_MOUSE;tr|B2RXQ9|B2RXQ9_MOUSE;tr|D3Z080|D3Z080_MOUSE;tr|A0A0R4J1T1|A0A0R4J1T1_MOUSE;sp|Q3UTJ2|SRBS2_MOUSE;tr|B7ZWM6|B7ZWM6_MOUSE;tr|B9EKP8|B9EKP8_MOUSE	>tr|D3Z203|D3Z203_MOUSE Sorbin and SH3 domain-containing protein 2 (Fragment) OS=Mus musculus OX=10090 GN=Sorbs2 PE=1 SV=1;>tr|A0A1B0GRC3|A0A1B0GRC3_MOUSE Sorbin and SH3 domain-containing protein 2 OS=Mus musculus OX=10090 GN=Sorbs2 PE=1 SV=1;>tr|A0A0R4J1X	1	9.4	23.397	3.5486	0	0	0	1	0	0	357480	606490	362660	1689400	727350	0
sp|Q3UUV5|SKAP1_MOUSE	sp|Q3UUV5|SKAP1_MOUSE	>sp|Q3UUV5|SKAP1_MOUSE Src kinase-associated phosphoprotein 1 OS=Mus musculus OX=10090 GN=Skap1 PE=1 SV=1	5	15.8	40.962	14.001	3	6	3	2	4	3	7679400	12741000	8161700	11110000	9686000	10612000
sp|Q3UV17|K22O_MOUSE	sp|Q3UV17|K22O_MOUSE	>sp|Q3UV17|K22O_MOUSE Keratin, type II cytoskeletal 2 oral OS=Mus musculus OX=10090 GN=Krt76 PE=1 SV=1	1	3	62.844	2.6461	0	0	1	0	0	0	0	0	683660	0	0	0
sp|Q3UV70|PDP1_MOUSE	sp|Q3UV70|PDP1_MOUSE;tr|A2AJP9|A2AJP9_MOUSE;tr|A8Y5Q0|A8Y5Q0_MOUSE;tr|A2AJQ0|A2AJQ0_MOUSE	>sp|Q3UV70|PDP1_MOUSE [Pyruvate dehydrogenase [acetyl-transferring]]-phosphatase 1, mitochondrial OS=Mus musculus OX=10090 GN=Pdp1 PE=1 SV=1;>tr|A2AJP9|A2AJP9_MOUSE MCG54027, isoform CRA_a OS=Mus musculus OX=10090 GN=Pdp1 PE=1 SV=2;>tr|A8Y5Q0|A8Y5Q0_MOUSE	2	4.6	61.18	6.6229	1	0	0	1	0	1	127940	0	0	0	254710	340070
sp|Q3UW53|NIBAN_MOUSE	sp|Q3UW53|NIBAN_MOUSE;tr|E9PYV4|E9PYV4_MOUSE	>sp|Q3UW53|NIBAN_MOUSE Protein Niban OS=Mus musculus OX=10090 GN=Fam129a PE=1 SV=2;>tr|E9PYV4|E9PYV4_MOUSE Protein Niban OS=Mus musculus OX=10090 GN=Fam129a PE=1 SV=1	6	8.7	102.65	18.71	3	3	1	5	3	4	756000	1156700	1118400	1573800	1327400	1298500
tr|B1AUY9|B1AUY9_MOUSE	tr|B1AUY9|B1AUY9_MOUSE;tr|B1AUZ1|B1AUZ1_MOUSE;sp|Q3UX61|NAA11_MOUSE;tr|Q9CQX6|Q9CQX6_MOUSE;tr|B1AUY8|B1AUY8_MOUSE;tr|Q3V4D5|Q3V4D5_MOUSE;tr|B1AUY7|B1AUY7_MOUSE;sp|Q9QY36|NAA10_MOUSE	>tr|B1AUY9|B1AUY9_MOUSE N-alpha-acetyltransferase 10 OS=Mus musculus OX=10090 GN=Naa10 PE=1 SV=1;>tr|B1AUZ1|B1AUZ1_MOUSE N-alpha-acetyltransferase 10 OS=Mus musculus OX=10090 GN=Naa10 PE=1 SV=1;>sp|Q3UX61|NAA11_MOUSE N-alpha-acetyltransferase 11 OS=Mus mus	1	11.2	19.57	3.8842	1	2	3	2	0	0	1427100	1904100	2768500	3196600	787370	2737000
sp|Q3UYV9|NCBP1_MOUSE	sp|Q3UYV9|NCBP1_MOUSE	>sp|Q3UYV9|NCBP1_MOUSE Nuclear cap-binding protein subunit 1 OS=Mus musculus OX=10090 GN=Ncbp1 PE=1 SV=2	2	4.1	91.926	10.512	3	3	5	2	2	3	428330	652190	775330	1120100	976520	959140
sp|Q3UZ39|LRRF1_MOUSE	sp|Q3UZ39|LRRF1_MOUSE;tr|G5E8E1|G5E8E1_MOUSE;tr|A0A087WNU6|A0A087WNU6_MOUSE;tr|E9Q9T1|E9Q9T1_MOUSE;tr|A0A087WPK3|A0A087WPK3_MOUSE	>sp|Q3UZ39|LRRF1_MOUSE Leucine-rich repeat flightless-interacting protein 1 OS=Mus musculus OX=10090 GN=Lrrfip1 PE=1 SV=2;>tr|G5E8E1|G5E8E1_MOUSE Leucine rich repeat (In FLII) interacting protein 1, isoform CRA_e OS=Mus musculus OX=10090 GN=Lrrfip1 PE=1 SV	9	23.6	79.248	76.736	5	12	17	13	16	15	6234300	7294300	7917300	9053300	9825300	11362000
sp|Q3UZA1|CPZIP_MOUSE	sp|Q3UZA1|CPZIP_MOUSE	>sp|Q3UZA1|CPZIP_MOUSE CapZ-interacting protein OS=Mus musculus OX=10090 GN=Rcsd1 PE=1 SV=1	6	27.2	44.114	97.72	8	9	7	9	10	7	6370200	11997000	7552800	18258000	15028000	10387000
sp|Q3V3E1|UBS3A_MOUSE	sp|Q3V3E1|UBS3A_MOUSE	>sp|Q3V3E1|UBS3A_MOUSE Ubiquitin-associated and SH3 domain-containing protein A OS=Mus musculus OX=10090 GN=Ubash3a PE=1 SV=1	4	6.9	70.144	12.798	1	1	2	1	1	2	909480	800100	1224000	2309100	1656900	1369100
sp|Q3V3R1|C1TM_MOUSE	sp|Q3V3R1|C1TM_MOUSE	>sp|Q3V3R1|C1TM_MOUSE Monofunctional C1-tetrahydrofolate synthase, mitochondrial OS=Mus musculus OX=10090 GN=Mthfd1l PE=1 SV=2	19	24.5	105.73	128.65	16	22	21	30	21	28	6105100	7586400	6080100	10328000	8781000	9466300
tr|B7ZNP3|B7ZNP3_MOUSE	tr|B7ZNP3|B7ZNP3_MOUSE;sp|Q3V4B5|COMD6_MOUSE	>tr|B7ZNP3|B7ZNP3_MOUSE COMM domain-containing protein 6 OS=Mus musculus OX=10090 GN=Commd6 PE=1 SV=1;>sp|Q3V4B5|COMD6_MOUSE COMM domain-containing protein 6 OS=Mus musculus OX=10090 GN=Commd6 PE=1 SV=1	1	16.9	9.4097	3.6198	1	2	0	0	1	1	1280300	2169600	0	0	2141200	1766100
sp|Q4FK66|PR38A_MOUSE	sp|Q4FK66|PR38A_MOUSE	>sp|Q4FK66|PR38A_MOUSE Pre-mRNA-splicing factor 38A OS=Mus musculus OX=10090 GN=Prpf38a PE=1 SV=1	2	9	37.436	7.6643	2	1	0	1	0	1	1350900	2848300	1852500	0	1690900	2136500
sp|Q9WVA2|TIM8A_MOUSE	sp|Q9WVA2|TIM8A_MOUSE;sp|Q4FZG7|TI8AB_MOUSE	>sp|Q9WVA2|TIM8A_MOUSE Mitochondrial import inner membrane translocase subunit Tim8 A OS=Mus musculus OX=10090 GN=Timm8a1 PE=1 SV=1;>sp|Q4FZG7|TI8AB_MOUSE Putative mitochondrial import inner membrane translocase subunit Tim8 A-B OS=Mus musculus OX=10090 GN	1	11.3	11.042	25.598	2	2	2	1	2	2	10316000	11633000	4804900	11001000	8167100	8836800
tr|A0A1W2P7X0|A0A1W2P7X0_MOUSE	tr|A0A1W2P7X0|A0A1W2P7X0_MOUSE;tr|E9QMV2|E9QMV2_MOUSE;sp|Q4KML4|ABRAL_MOUSE	>tr|A0A1W2P7X0|A0A1W2P7X0_MOUSE Costars family protein ABRACL (Fragment) OS=Mus musculus OX=10090 GN=Abracl PE=1 SV=1;>tr|E9QMV2|E9QMV2_MOUSE Costars family protein ABRACL OS=Mus musculus OX=10090 GN=Abracl PE=1 SV=1;>sp|Q4KML4|ABRAL_MOUSE Costars family p	2	43.9	6.4374	22.328	4	8	5	4	5	6	43772000	63248000	42143000	54308000	60957000	87337000
tr|E9PUB0|E9PUB0_MOUSE	tr|E9PUB0|E9PUB0_MOUSE;sp|Q4LDD4|ARAP1_MOUSE	>tr|E9PUB0|E9PUB0_MOUSE Arf-GAP with Rho-GAP domain, ANK repeat and PH domain-containing protein 1 OS=Mus musculus OX=10090 GN=Arap1 PE=1 SV=1;>sp|Q4LDD4|ARAP1_MOUSE Arf-GAP with Rho-GAP domain, ANK repeat and PH domain-containing protein 1 OS=Mus musculus	2	3.9	83.2	5.4397	1	0	1	0	2	2	120530	30299	268780	149130	131740	206260
sp|Q4QRL3|CC88B_MOUSE	sp|Q4QRL3|CC88B_MOUSE	>sp|Q4QRL3|CC88B_MOUSE Coiled-coil domain-containing protein 88B OS=Mus musculus OX=10090 GN=Ccdc88b PE=1 SV=2	18	17.4	166.61	63.202	8	9	10	11	6	6	1408600	1711500	1346100	2170600	1880300	1316400
tr|A0A087WNP6|A0A087WNP6_MOUSE	tr|A0A087WNP6|A0A087WNP6_MOUSE;sp|Q4VAA2|CDV3_MOUSE;tr|A0A087WRM0|A0A087WRM0_MOUSE	>tr|A0A087WNP6|A0A087WNP6_MOUSE Protein CDV3 OS=Mus musculus OX=10090 GN=Cdv3 PE=1 SV=1;>sp|Q4VAA2|CDV3_MOUSE Protein CDV3 OS=Mus musculus OX=10090 GN=Cdv3 PE=1 SV=2;>tr|A0A087WRM0|A0A087WRM0_MOUSE Protein CDV3 (Fragment) OS=Mus musculus OX=10090 GN=Cdv3 P	6	49.4	24.196	79.338	9	8	12	12	14	13	14488000	16929000	20590000	33352000	23565000	23676000
sp|Q4VBE8|WDR18_MOUSE	sp|Q4VBE8|WDR18_MOUSE	>sp|Q4VBE8|WDR18_MOUSE WD repeat-containing protein 18 OS=Mus musculus OX=10090 GN=Wdr18 PE=1 SV=1	3	8.4	47.211	9.4782	3	4	3	1	3	3	1957000	2366000	985290	1443100	1712100	2299900
sp|Q501J6|DDX17_MOUSE	sp|Q501J6|DDX17_MOUSE;tr|Q3U741|Q3U741_MOUSE;tr|Q3TU25|Q3TU25_MOUSE	>sp|Q501J6|DDX17_MOUSE Probable ATP-dependent RNA helicase DDX17 OS=Mus musculus OX=10090 GN=Ddx17 PE=1 SV=1;>tr|Q3U741|Q3U741_MOUSE DEAD (Asp-Glu-Ala-Asp) box polypeptide 17, isoform CRA_a OS=Mus musculus OX=10090 GN=Ddx17 PE=1 SV=1;>tr|Q3TU25|Q3TU25_MOUS	15	36	72.399	155.8	26	25	23	23	26	25	19151000	16264000	13321000	22726000	17667000	19355000
tr|B2KGA7|B2KGA7_MOUSE	tr|B2KGA7|B2KGA7_MOUSE;sp|Q505B7|ARCH_MOUSE;tr|A8Y5E9|A8Y5E9_MOUSE	>tr|B2KGA7|B2KGA7_MOUSE Protein archease OS=Mus musculus OX=10090 GN=Zbtb8os PE=1 SV=1;>sp|Q505B7|ARCH_MOUSE Protein archease OS=Mus musculus OX=10090 GN=Zbtb8os PE=1 SV=2;>tr|A8Y5E9|A8Y5E9_MOUSE Protein archease OS=Mus musculus OX=10090 GN=Zbtb8os PE=1 SV	3	23.4	19.58	24.7	3	2	2	2	2	3	6498100	8698200	8256500	10782000	4805500	13363000
sp|Q505F5|LRC47_MOUSE	sp|Q505F5|LRC47_MOUSE;tr|E9PV22|E9PV22_MOUSE	>sp|Q505F5|LRC47_MOUSE Leucine-rich repeat-containing protein 47 OS=Mus musculus OX=10090 GN=Lrrc47 PE=1 SV=1;>tr|E9PV22|E9PV22_MOUSE Leucine-rich repeat-containing protein 47 OS=Mus musculus OX=10090 GN=Lrrc47 PE=1 SV=1	10	23.4	63.589	40.015	9	9	4	6	5	7	2892700	3107900	3479200	4059700	2351100	3143400
tr|E9QKA4|E9QKA4_MOUSE	tr|E9QKA4|E9QKA4_MOUSE;tr|A2A8V8|A2A8V8_MOUSE;tr|A2A8V9|A2A8V9_MOUSE;tr|E9PUK6|E9PUK6_MOUSE;sp|Q52KI8|SRRM1_MOUSE;tr|A2A983|A2A983_MOUSE	>tr|E9QKA4|E9QKA4_MOUSE Serine/arginine repetitive matrix protein 1 OS=Mus musculus OX=10090 GN=Srrm1 PE=1 SV=1;>tr|A2A8V8|A2A8V8_MOUSE Serine/arginine repetitive matrix protein 1 OS=Mus musculus OX=10090 GN=Srrm1 PE=1 SV=1;>tr|A2A8V9|A2A8V9_MOUSE Serine/a	4	7.8	101.16	23.926	5	4	3	4	1	3	2251800	2461100	2706100	2481100	2739300	2741300
sp|Q569Z5|DDX46_MOUSE	sp|Q569Z5|DDX46_MOUSE;tr|F8WHR6|F8WHR6_MOUSE	>sp|Q569Z5|DDX46_MOUSE Probable ATP-dependent RNA helicase DDX46 OS=Mus musculus OX=10090 GN=Ddx46 PE=1 SV=2;>tr|F8WHR6|F8WHR6_MOUSE Probable ATP-dependent RNA helicase DDX46 OS=Mus musculus OX=10090 GN=Ddx46 PE=1 SV=1	23	21.2	117.45	97.948	17	24	22	22	20	23	6511700	9331700	9005900	8411500	9278900	8659700
sp|Q569Z6|TR150_MOUSE	sp|Q569Z6|TR150_MOUSE;tr|Q8BZN7|Q8BZN7_MOUSE	>sp|Q569Z6|TR150_MOUSE Thyroid hormone receptor-associated protein 3 OS=Mus musculus OX=10090 GN=Thrap3 PE=1 SV=1;>tr|Q8BZN7|Q8BZN7_MOUSE Thyroid hormone receptor-associated protein 3 OS=Mus musculus OX=10090 GN=Thrap3 PE=1 SV=1	13	19.8	108.18	194.58	20	23	24	21	25	21	26199000	30175000	25885000	28557000	27420000	28291000
tr|Q8CC47|Q8CC47_MOUSE	tr|Q8CC47|Q8CC47_MOUSE;sp|Q571E4|GALNS_MOUSE	>tr|Q8CC47|Q8CC47_MOUSE N-acetylgalactosamine-6-sulfatase OS=Mus musculus OX=10090 GN=Galns PE=1 SV=1;>sp|Q571E4|GALNS_MOUSE N-acetylgalactosamine-6-sulfatase OS=Mus musculus OX=10090 GN=Galns PE=1 SV=2	1	3.6	48.555	3.5985	0	0	0	1	1	1	0	693430	237850	471550	365190	336140
tr|D3Z0B9|D3Z0B9_MOUSE	tr|D3Z0B9|D3Z0B9_MOUSE;tr|A0A1B0GSU0|A0A1B0GSU0_MOUSE;sp|Q571I9|A16A1_MOUSE	>tr|D3Z0B9|D3Z0B9_MOUSE Aldehyde dehydrogenase family 16 member A1 OS=Mus musculus OX=10090 GN=Aldh16a1 PE=1 SV=3;>tr|A0A1B0GSU0|A0A1B0GSU0_MOUSE Aldehyde dehydrogenase family 16 member A1 OS=Mus musculus OX=10090 GN=Aldh16a1 PE=1 SV=1;>sp|Q571I9|A16A1_MOU	3	6.4	79.488	7.5072	2	1	1	3	2	2	1332500	1254300	810240	1083400	1441800	717150
tr|F6SH61|F6SH61_MOUSE	tr|F6SH61|F6SH61_MOUSE;tr|Z4YMB8|Z4YMB8_MOUSE;tr|A0A0R4J196|A0A0R4J196_MOUSE;tr|F8WH31|F8WH31_MOUSE;tr|E9PUD1|E9PUD1_MOUSE;sp|Q58A65|JIP4_MOUSE;tr|F6WNT4|F6WNT4_MOUSE	>tr|F6SH61|F6SH61_MOUSE C-Jun-amino-terminal kinase-interacting protein 4 (Fragment) OS=Mus musculus OX=10090 GN=Spag9 PE=1 SV=1;>tr|Z4YMB8|Z4YMB8_MOUSE C-Jun-amino-terminal kinase-interacting protein 4 (Fragment) OS=Mus musculus OX=10090 GN=Spag9 PE=1 SV=	2	3.7	84.935	4.3383	1	1	2	1	1	1	1077600	88947	1150600	106010	88135	287240
sp|Q59J78|NDUF2_MOUSE	sp|Q59J78|NDUF2_MOUSE	>sp|Q59J78|NDUF2_MOUSE NADH dehydrogenase [ubiquinone] 1 alpha subcomplex assembly factor 2 OS=Mus musculus OX=10090 GN=Ndufaf2 PE=1 SV=1	2	21.4	19.628	5.2123	0	1	1	0	3	4	0	2506000	1453400	1100000	1953300	2997000
sp|Q5DTM8|BRE1A_MOUSE	sp|Q5DTM8|BRE1A_MOUSE;tr|A2AIR2|A2AIR2_MOUSE	>sp|Q5DTM8|BRE1A_MOUSE E3 ubiquitin-protein ligase BRE1A OS=Mus musculus OX=10090 GN=Rnf20 PE=1 SV=2;>tr|A2AIR2|A2AIR2_MOUSE E3 ubiquitin protein ligase (Fragment) OS=Mus musculus OX=10090 GN=Rnf20 PE=1 SV=1	7	9.7	113.52	19.062	5	2	3	7	3	6	1086000	581250	537540	1591600	677520	1519500
sp|Q5DU31|ICEF1_MOUSE	sp|Q5DU31|ICEF1_MOUSE;tr|D3Z0U6|D3Z0U6_MOUSE;tr|Q3UX69|Q3UX69_MOUSE;tr|D3YVQ1|D3YVQ1_MOUSE	>sp|Q5DU31|ICEF1_MOUSE Interactor protein for cytohesin exchange factors 1 OS=Mus musculus OX=10090 GN=Ipcef1 PE=1 SV=2;>tr|D3Z0U6|D3Z0U6_MOUSE Interactor protein for cytohesin exchange factors 1 (Fragment) OS=Mus musculus OX=10090 GN=Ipcef1 PE=1 SV=1;>tr|	2	6.7	45.812	8.6176	3	3	3	3	3	3	1878400	2162400	2028800	3944100	2505600	2911900
tr|A0A1D5RM65|A0A1D5RM65_MOUSE	tr|A0A1D5RM65|A0A1D5RM65_MOUSE;sp|Q5EBH1|RASF5_MOUSE;tr|D3Z6G2|D3Z6G2_MOUSE	>tr|A0A1D5RM65|A0A1D5RM65_MOUSE Ras association domain-containing protein 5 OS=Mus musculus OX=10090 GN=Rassf5 PE=1 SV=1;>sp|Q5EBH1|RASF5_MOUSE Ras association domain-containing protein 5 OS=Mus musculus OX=10090 GN=Rassf5 PE=1 SV=1;>tr|D3Z6G2|D3Z6G2_MOUSE	3	12.5	35.341	8.0898	2	2	2	3	2	2	675330	18434000	549350	10180000	611180	895700
tr|A0A1D5RLU6|A0A1D5RLU6_MOUSE	tr|A0A1D5RLU6|A0A1D5RLU6_MOUSE;tr|A0A1D5RM77|A0A1D5RM77_MOUSE;tr|A0A1D5RLA2|A0A1D5RLA2_MOUSE;sp|Q5EE38|ACD_MOUSE	>tr|A0A1D5RLU6|A0A1D5RLU6_MOUSE Adrenocortical dysplasia protein OS=Mus musculus OX=10090 GN=Acd PE=1 SV=1;>tr|A0A1D5RM77|A0A1D5RM77_MOUSE Adrenocortical dysplasia protein OS=Mus musculus OX=10090 GN=Acd PE=1 SV=1;>tr|A0A1D5RLA2|A0A1D5RLA2_MOUSE Adrenocort	2	34.7	7.4905	5.6684	1	1	0	1	1	1	518520	4085800	0	3438100	1059200	1066000
sp|Q5FWK3|RHG01_MOUSE	sp|Q5FWK3|RHG01_MOUSE;tr|A2AH25|A2AH25_MOUSE	>sp|Q5FWK3|RHG01_MOUSE Rho GTPase-activating protein 1 OS=Mus musculus OX=10090 GN=Arhgap1 PE=1 SV=1;>tr|A2AH25|A2AH25_MOUSE Rho GTPase-activating protein 1 OS=Mus musculus OX=10090 GN=Arhgap1 PE=1 SV=1	8	23.2	50.41	27.878	5	6	7	9	8	9	5106900	5203200	5050500	6152300	5532800	5922200
sp|Q5M8N4|D39U1_MOUSE	sp|Q5M8N4|D39U1_MOUSE	>sp|Q5M8N4|D39U1_MOUSE Epimerase family protein SDR39U1 OS=Mus musculus OX=10090 GN=Sdr39u1 PE=1 SV=2	1	4.8	31.458	4.1788	0	1	1	1	1	1	0	485250	0	831220	665700	919940
sp|Q5NCQ5|DPH1_MOUSE	sp|Q5NCQ5|DPH1_MOUSE	>sp|Q5NCQ5|DPH1_MOUSE 2-(3-amino-3-carboxypropyl)histidine synthase subunit 1 OS=Mus musculus OX=10090 GN=Dph1 PE=1 SV=1	1	3.2	48.004	4.6416	0	0	0	1	1	1	504130	0	441740	243640	576290	251520
sp|Q5NCR9|NSRP1_MOUSE	sp|Q5NCR9|NSRP1_MOUSE	>sp|Q5NCR9|NSRP1_MOUSE Nuclear speckle splicing regulatory protein 1 OS=Mus musculus OX=10090 GN=Nsrp1 PE=1 SV=1	1	2.6	63.798	2.7492	0	0	0	1	2	1	0	0	0	0	0	0
sp|Q5SFM8|RBM27_MOUSE	sp|Q5SFM8|RBM27_MOUSE	>sp|Q5SFM8|RBM27_MOUSE RNA-binding protein 27 OS=Mus musculus OX=10090 GN=Rbm27 PE=1 SV=3	4	6.4	118.55	10.966	1	1	0	3	1	1	240120	182940	530760	594120	520930	590390
sp|Q5SQX6|CYFP2_MOUSE	sp|Q5SQX6|CYFP2_MOUSE;tr|F6QD74|F6QD74_MOUSE;sp|Q7TMB8|CYFP1_MOUSE;tr|A0A0R4J119|A0A0R4J119_MOUSE	>sp|Q5SQX6|CYFP2_MOUSE Cytoplasmic FMR1-interacting protein 2 OS=Mus musculus OX=10090 GN=Cyfip2 PE=1 SV=2;>tr|F6QD74|F6QD74_MOUSE Cytoplasmic FMR1-interacting protein 2 (Fragment) OS=Mus musculus OX=10090 GN=Cyfip2 PE=1 SV=1;>sp|Q7TMB8|CYFP1_MOUSE Cytopla	5	4.5	145.66	9.9137	1	1	1	0	1	3	280270	317260	231520	299300	119720	137950
sp|Q5SSI6|UTP18_MOUSE	sp|Q5SSI6|UTP18_MOUSE	>sp|Q5SSI6|UTP18_MOUSE U3 small nucleolar RNA-associated protein 18 homolog OS=Mus musculus OX=10090 GN=Utp18 PE=1 SV=1	1	3.3	61.217	3.9527	0	0	0	0	1	0	0	0	0	0	0	0
sp|Q5SUA5|MYO1G_MOUSE	sp|Q5SUA5|MYO1G_MOUSE	>sp|Q5SUA5|MYO1G_MOUSE Unconventional myosin-Ig OS=Mus musculus OX=10090 GN=Myo1g PE=1 SV=1	8	11.2	117.23	25.131	5	7	6	5	4	4	1087900	1756000	1883100	1560200	1361000	1384000
sp|Q5SUF2|LC7L3_MOUSE	sp|Q5SUF2|LC7L3_MOUSE	>sp|Q5SUF2|LC7L3_MOUSE Luc7-like protein 3 OS=Mus musculus OX=10090 GN=Luc7l3 PE=1 SV=1	3	10.4	51.45	11.302	1	3	3	2	2	1	2140800	1261100	1522100	3277900	2434700	2101400
sp|Q5SUR0|PUR4_MOUSE	sp|Q5SUR0|PUR4_MOUSE	>sp|Q5SUR0|PUR4_MOUSE Phosphoribosylformylglycinamidine synthase OS=Mus musculus OX=10090 GN=Pfas PE=1 SV=1	24	28.9	144.63	171.85	22	30	39	32	36	50	11409000	13487000	9918300	13480000	8649700	14645000
sp|Q5SVQ0|KAT7_MOUSE	sp|Q5SVQ0|KAT7_MOUSE	>sp|Q5SVQ0|KAT7_MOUSE Histone acetyltransferase KAT7 OS=Mus musculus OX=10090 GN=Kat7 PE=1 SV=1	1	2.4	70.641	3.7338	1	1	1	1	2	2	367040	323890	362540	719280	733070	836130
sp|Q5SWD9|TSR1_MOUSE	sp|Q5SWD9|TSR1_MOUSE	>sp|Q5SWD9|TSR1_MOUSE Pre-rRNA-processing protein TSR1 homolog OS=Mus musculus OX=10090 GN=Tsr1 PE=1 SV=1	2	3.2	92.104	3.8231	0	0	0	0	0	0	77037	110020	298710	0	0	153420
tr|D3Z131|D3Z131_MOUSE	tr|D3Z131|D3Z131_MOUSE;sp|Q5U4D9|THOC6_MOUSE;tr|D3Z132|D3Z132_MOUSE	>tr|D3Z131|D3Z131_MOUSE THO complex subunit 6 homolog OS=Mus musculus OX=10090 GN=Thoc6 PE=1 SV=1;>sp|Q5U4D9|THOC6_MOUSE THO complex subunit 6 homolog OS=Mus musculus OX=10090 GN=Thoc6 PE=1 SV=1;>tr|D3Z132|D3Z132_MOUSE THO complex subunit 6 homolog OS=Mus	3	15.9	32.714	15.335	2	2	2	1	1	2	1338500	1789900	1039500	1286600	1019500	2068500
sp|Q5U5M8|BL1S3_MOUSE	sp|Q5U5M8|BL1S3_MOUSE	>sp|Q5U5M8|BL1S3_MOUSE Biogenesis of lysosome-related organelles complex 1 subunit 3 OS=Mus musculus OX=10090 GN=Bloc1s3 PE=1 SV=1	2	16.4	20.398	6.005	0	1	0	0	2	0	345380	455490	276320	416950	1324200	0
sp|Q5UAK0|MIER1_MOUSE	sp|Q5UAK0|MIER1_MOUSE	>sp|Q5UAK0|MIER1_MOUSE Mesoderm induction early response protein 1 OS=Mus musculus OX=10090 GN=Mier1 PE=1 SV=2	1	1.8	57.908	3.287	0	1	0	0	0	0	0	698340	364530	719000	0	622040
sp|Q5XJE5|LEO1_MOUSE	sp|Q5XJE5|LEO1_MOUSE	>sp|Q5XJE5|LEO1_MOUSE RNA polymerase-associated protein LEO1 OS=Mus musculus OX=10090 GN=Leo1 PE=1 SV=2	4	6.3	75.596	9.5301	4	2	3	2	4	5	1205500	907180	727840	756820	1173300	915500
sp|Q5XJY5|COPD_MOUSE	sp|Q5XJY5|COPD_MOUSE	>sp|Q5XJY5|COPD_MOUSE Coatomer subunit delta OS=Mus musculus OX=10090 GN=Arcn1 PE=1 SV=2	10	21.9	57.229	31.519	7	5	3	11	10	6	6119700	2827800	5285200	7696000	6435400	7921700
sp|Q60520|SIN3A_MOUSE	sp|Q60520|SIN3A_MOUSE	>sp|Q60520|SIN3A_MOUSE Paired amphipathic helix protein Sin3a OS=Mus musculus OX=10090 GN=Sin3a PE=1 SV=3	3	2.6	145.09	4.8404	0	1	0	2	0	0	279930	318950	145010	228710	217690	300170
sp|Q60591|NFAC2_MOUSE	sp|Q60591|NFAC2_MOUSE;tr|A2AQC8|A2AQC8_MOUSE;tr|B5B2R5|B5B2R5_MOUSE	>sp|Q60591|NFAC2_MOUSE Nuclear factor of activated T-cells, cytoplasmic 2 OS=Mus musculus OX=10090 GN=Nfatc2 PE=1 SV=3;>tr|A2AQC8|A2AQC8_MOUSE Nuclear factor of activated T-cells c2 isoform IA-IIL-VIIa OS=Mus musculus OX=10090 GN=Nfatc2 PE=1 SV=1;>tr|B5B2R	10	16.5	100.02	43.274	6	9	8	15	14	16	2218200	2963100	2651800	6172800	3794900	4577400
sp|Q60596|XRCC1_MOUSE	sp|Q60596|XRCC1_MOUSE	>sp|Q60596|XRCC1_MOUSE DNA repair protein XRCC1 OS=Mus musculus OX=10090 GN=Xrcc1 PE=1 SV=2	3	9.4	68.97	7.4884	0	1	0	2	3	2	1165300	974080	1601800	338110	1402800	405850
tr|Z4YJV4|Z4YJV4_MOUSE	tr|Z4YJV4|Z4YJV4_MOUSE;sp|Q60597|ODO1_MOUSE	>tr|Z4YJV4|Z4YJV4_MOUSE 2-oxoglutarate dehydrogenase, mitochondrial OS=Mus musculus OX=10090 GN=Ogdh PE=1 SV=1;>sp|Q60597|ODO1_MOUSE 2-oxoglutarate dehydrogenase, mitochondrial OS=Mus musculus OX=10090 GN=Ogdh PE=1 SV=3	15	18.5	116.03	79.253	9	14	19	15	19	19	7383100	5849900	5046900	9318200	6135200	8907000
sp|Q60604|ADSV_MOUSE	sp|Q60604|ADSV_MOUSE	>sp|Q60604|ADSV_MOUSE Adseverin OS=Mus musculus OX=10090 GN=Scin PE=1 SV=3	1	1.5	80.253	2.6939	1	1	0	0	0	0	465520	205690	282720	241810	316820	0
sp|Q60605|MYL6_MOUSE	sp|Q60605|MYL6_MOUSE;tr|A0A1W2P6F6|A0A1W2P6F6_MOUSE;tr|A0A1W2P7Q9|A0A1W2P7Q9_MOUSE;tr|A0A1W2P6G5|A0A1W2P6G5_MOUSE	>sp|Q60605|MYL6_MOUSE Myosin light polypeptide 6 OS=Mus musculus OX=10090 GN=Myl6 PE=1 SV=3;>tr|A0A1W2P6F6|A0A1W2P6F6_MOUSE Myosin light polypeptide 6 OS=Mus musculus OX=10090 GN=Myl6 PE=1 SV=1;>tr|A0A1W2P7Q9|A0A1W2P7Q9_MOUSE Myosin light polypeptide 6 OS=	8	55.6	16.93	187.64	22	23	19	28	25	21	388900000	424290000	406850000	527950000	696020000	645110000
sp|Q60611|SATB1_MOUSE	sp|Q60611|SATB1_MOUSE;tr|E9PVB7|E9PVB7_MOUSE	>sp|Q60611|SATB1_MOUSE DNA-binding protein SATB1 OS=Mus musculus OX=10090 GN=Satb1 PE=1 SV=2;>tr|E9PVB7|E9PVB7_MOUSE DNA-binding protein SATB OS=Mus musculus OX=10090 GN=Satb1 PE=1 SV=1	7	13	85.879	28.736	4	7	5	6	4	4	3168500	3761800	2814300	2707600	1577000	2712400
tr|B1AT92|B1AT92_MOUSE	tr|B1AT92|B1AT92_MOUSE;sp|Q60631|GRB2_MOUSE	>tr|B1AT92|B1AT92_MOUSE Growth factor receptor-bound protein 2 OS=Mus musculus OX=10090 GN=Grb2 PE=1 SV=1;>sp|Q60631|GRB2_MOUSE Growth factor receptor-bound protein 2 OS=Mus musculus OX=10090 GN=Grb2 PE=1 SV=1	10	47.8	23.587	46.878	9	12	8	12	10	8	23861000	48122000	14738000	32693000	41459000	26954000
sp|Q60648|SAP3_MOUSE	sp|Q60648|SAP3_MOUSE	>sp|Q60648|SAP3_MOUSE Ganglioside GM2 activator OS=Mus musculus OX=10090 GN=Gm2a PE=1 SV=2	3	24.4	20.824	10.84	1	4	3	0	2	2	6583300	10905000	10296000	15807000	9925600	12567000
tr|F6ZV59|F6ZV59_MOUSE	tr|F6ZV59|F6ZV59_MOUSE;tr|G5E8G0|G5E8G0_MOUSE;tr|G3X9W0|G3X9W0_MOUSE;sp|Q60668|HNRPD_MOUSE;tr|E9Q5B6|E9Q5B6_MOUSE	>tr|F6ZV59|F6ZV59_MOUSE Heterogeneous nuclear ribonucleoprotein D0 (Fragment) OS=Mus musculus OX=10090 GN=Hnrnpd PE=1 SV=1;>tr|G5E8G0|G5E8G0_MOUSE Heterogeneous nuclear ribonucleoprotein D, isoform CRA_b OS=Mus musculus OX=10090 GN=Hnrnpd PE=1 SV=1;>tr|G3X	12	50.5	24.611	120.44	30	33	32	30	33	35	151660000	177850000	193510000	254330000	183180000	188020000
tr|F7BX26|F7BX26_MOUSE	tr|F7BX26|F7BX26_MOUSE;sp|Q60676|PPP5_MOUSE	>tr|F7BX26|F7BX26_MOUSE Serine/threonine-protein phosphatase (Fragment) OS=Mus musculus OX=10090 GN=Ppp5c PE=1 SV=1;>sp|Q60676|PPP5_MOUSE Serine/threonine-protein phosphatase 5 OS=Mus musculus OX=10090 GN=Ppp5c PE=1 SV=3	2	6.7	54.205	4.1954	0	0	0	0	0	2	452060	289560	285040	467780	326910	634770
sp|Q60692|PSB6_MOUSE	sp|Q60692|PSB6_MOUSE	>sp|Q60692|PSB6_MOUSE Proteasome subunit beta type-6 OS=Mus musculus OX=10090 GN=Psmb6 PE=1 SV=3	3	12.6	25.378	19.145	3	4	4	3	2	4	12789000	3111300	8829100	3034500	8162000	11445000
sp|Q60710|SAMH1_MOUSE	sp|Q60710|SAMH1_MOUSE;tr|F6TVP2|F6TVP2_MOUSE;tr|E9PYG9|E9PYG9_MOUSE	>sp|Q60710|SAMH1_MOUSE Deoxynucleoside triphosphate triphosphohydrolase SAMHD1 OS=Mus musculus OX=10090 GN=Samhd1 PE=1 SV=3;>tr|F6TVP2|F6TVP2_MOUSE Deoxynucleoside triphosphate triphosphohydrolase SAMHD1 (Fragment) OS=Mus musculus OX=10090 GN=Samhd1 PE=1 S	29	54.6	75.892	323.31	67	68	71	76	72	76	75622000	94575000	90583000	126570000	89581000	103350000
sp|Q60737|CSK21_MOUSE	sp|Q60737|CSK21_MOUSE	>sp|Q60737|CSK21_MOUSE Casein kinase II subunit alpha OS=Mus musculus OX=10090 GN=Csnk2a1 PE=1 SV=2	5	19.9	45.133	20.72	6	6	5	6	4	5	2576400	3403200	2942900	5297500	2757500	2877700
tr|F6TCF9|F6TCF9_MOUSE	tr|F6TCF9|F6TCF9_MOUSE;tr|A0A1L1SRT0|A0A1L1SRT0_MOUSE;sp|Q60739|BAG1_MOUSE	>tr|F6TCF9|F6TCF9_MOUSE BAG family molecular chaperone regulator 1 OS=Mus musculus OX=10090 GN=Bag1 PE=1 SV=1;>tr|A0A1L1SRT0|A0A1L1SRT0_MOUSE BAG family molecular chaperone regulator 1 OS=Mus musculus OX=10090 GN=Bag1 PE=1 SV=1;>sp|Q60739|BAG1_MOUSE BAG fa	3	9.3	39.696	23.361	2	2	2	3	3	2	1705900	2238800	1822600	1715400	1192400	1138200
sp|Q60749|KHDR1_MOUSE	sp|Q60749|KHDR1_MOUSE	>sp|Q60749|KHDR1_MOUSE KH domain-containing, RNA-binding, signal transduction-associated protein 1 OS=Mus musculus OX=10090 GN=Khdrbs1 PE=1 SV=2	6	14.4	48.37	31.782	5	7	7	5	6	9	19140000	18542000	21383000	18699000	19960000	18848000
sp|Q60759|GCDH_MOUSE	sp|Q60759|GCDH_MOUSE;tr|A0A0A0MQ68|A0A0A0MQ68_MOUSE	>sp|Q60759|GCDH_MOUSE Glutaryl-CoA dehydrogenase, mitochondrial OS=Mus musculus OX=10090 GN=Gcdh PE=1 SV=2;>tr|A0A0A0MQ68|A0A0A0MQ68_MOUSE Glutaryl-CoA dehydrogenase, mitochondrial OS=Mus musculus OX=10090 GN=Gcdh PE=1 SV=1	2	5.9	48.605	4.3248	1	1	1	1	1	2	377070	519730	403420	622560	869390	583480
tr|A0A2I3BPX9|A0A2I3BPX9_MOUSE	tr|A0A2I3BPX9|A0A2I3BPX9_MOUSE;sp|Q60775|ELF1_MOUSE	>tr|A0A2I3BPX9|A0A2I3BPX9_MOUSE ETS-related transcription factor Elf-1 OS=Mus musculus OX=10090 GN=Elf1 PE=1 SV=1;>sp|Q60775|ELF1_MOUSE ETS-related transcription factor Elf-1 OS=Mus musculus OX=10090 GN=Elf1 PE=1 SV=1	4	16	62.29	19.082	8	8	9	9	12	11	4621300	6024000	6889200	11181000	8714800	8012500
sp|Q60778|IKBB_MOUSE	sp|Q60778|IKBB_MOUSE	>sp|Q60778|IKBB_MOUSE NF-kappa-B inhibitor beta OS=Mus musculus OX=10090 GN=Nfkbib PE=1 SV=2	1	4.5	37.965	3.468	0	1	3	3	0	1	52710	359730	334130	369650	471640	540260
sp|Q60787|LCP2_MOUSE	sp|Q60787|LCP2_MOUSE;tr|B1ATD1|B1ATD1_MOUSE	>sp|Q60787|LCP2_MOUSE Lymphocyte cytosolic protein 2 OS=Mus musculus OX=10090 GN=Lcp2 PE=1 SV=2;>tr|B1ATD1|B1ATD1_MOUSE Lymphocyte cytosolic protein 2 OS=Mus musculus OX=10090 GN=Lcp2 PE=1 SV=2	13	28.9	60.238	79.593	14	11	10	15	10	15	14838000	18495000	19144000	23066000	25841000	20120000
tr|F8WHG5|F8WHG5_MOUSE	tr|F8WHG5|F8WHG5_MOUSE;sp|Q60823|AKT2_MOUSE	>tr|F8WHG5|F8WHG5_MOUSE RAC-beta serine/threonine-protein kinase OS=Mus musculus OX=10090 GN=Akt2 PE=1 SV=1;>sp|Q60823|AKT2_MOUSE RAC-beta serine/threonine-protein kinase OS=Mus musculus OX=10090 GN=Akt2 PE=1 SV=1	2	6.8	51.056	2.7401	0	0	1	1	0	0	249860	233000	321760	210700	143340	217810
sp|Q60854|SPB6_MOUSE	sp|Q60854|SPB6_MOUSE;tr|F8WIV2|F8WIV2_MOUSE	>sp|Q60854|SPB6_MOUSE Serpin B6 OS=Mus musculus OX=10090 GN=Serpinb6 PE=1 SV=1;>tr|F8WIV2|F8WIV2_MOUSE Serine (or cysteine) peptidase inhibitor, clade B, member 6a OS=Mus musculus OX=10090 GN=Serpinb6a PE=1 SV=1	4	17.7	42.598	17.839	1	0	4	3	4	2	1486000	568280	2489300	2480400	2098000	1591600
sp|Q60855|RIPK1_MOUSE	sp|Q60855|RIPK1_MOUSE;tr|F7D1J2|F7D1J2_MOUSE	>sp|Q60855|RIPK1_MOUSE Receptor-interacting serine/threonine-protein kinase 1 OS=Mus musculus OX=10090 GN=Ripk1 PE=1 SV=1;>tr|F7D1J2|F7D1J2_MOUSE Receptor-interacting serine/threonine-protein kinase 1 (Fragment) OS=Mus musculus OX=10090 GN=Ripk1 PE=1 SV=1	2	3.2	74.854	3.1742	1	2	1	1	2	1	93199	275470	0	125710	157030	0
sp|Q60864|STIP1_MOUSE	sp|Q60864|STIP1_MOUSE	>sp|Q60864|STIP1_MOUSE Stress-induced-phosphoprotein 1 OS=Mus musculus OX=10090 GN=Stip1 PE=1 SV=1	33	49.4	62.581	304.89	45	46	59	68	58	62	54372000	62888000	71631000	88412000	83813000	80431000
sp|Q60865|CAPR1_MOUSE	sp|Q60865|CAPR1_MOUSE	>sp|Q60865|CAPR1_MOUSE Caprin-1 OS=Mus musculus OX=10090 GN=Caprin1 PE=1 SV=2	6	13.3	78.168	25.083	4	3	6	5	5	6	9718600	12027000	10722000	10524000	12161000	14369000
tr|H3BJU7|H3BJU7_MOUSE	tr|H3BJU7|H3BJU7_MOUSE;tr|H3BJX8|H3BJX8_MOUSE;tr|H3BJ45|H3BJ45_MOUSE;tr|H3BJ40|H3BJ40_MOUSE;tr|H3BKH9|H3BKH9_MOUSE;sp|Q60875|ARHG2_MOUSE	>tr|H3BJU7|H3BJU7_MOUSE Rho guanine nucleotide exchange factor 2 OS=Mus musculus OX=10090 GN=Arhgef2 PE=1 SV=1;>tr|H3BJX8|H3BJX8_MOUSE Rho guanine nucleotide exchange factor 2 OS=Mus musculus OX=10090 GN=Arhgef2 PE=1 SV=1;>tr|H3BJ45|H3BJ45_MOUSE Rho guanin	2	3.2	108.59	6.3381	2	0	0	0	0	1	156050	167730	109030	46980	74301	76751
sp|Q60902|EP15R_MOUSE	sp|Q60902|EP15R_MOUSE;tr|A0A1D5RLS1|A0A1D5RLS1_MOUSE	>sp|Q60902|EP15R_MOUSE Epidermal growth factor receptor substrate 15-like 1 OS=Mus musculus OX=10090 GN=Eps15l1 PE=1 SV=3;>tr|A0A1D5RLS1|A0A1D5RLS1_MOUSE Epidermal growth factor receptor substrate 15-like 1 OS=Mus musculus OX=10090 GN=Eps15l1 PE=1 SV=1	7	9.8	99.307	23.404	5	3	6	4	7	6	657560	886790	795570	921590	912470	1370900
tr|G3UX26|G3UX26_MOUSE	tr|G3UX26|G3UX26_MOUSE;sp|Q60930|VDAC2_MOUSE	>tr|G3UX26|G3UX26_MOUSE Voltage-dependent anion-selective channel protein 2 OS=Mus musculus OX=10090 GN=Vdac2 PE=1 SV=1;>sp|Q60930|VDAC2_MOUSE Voltage-dependent anion-selective channel protein 2 OS=Mus musculus OX=10090 GN=Vdac2 PE=1 SV=2	5	22.6	30.446	26.417	10	7	8	7	9	8	10430000	11026000	11157000	20461000	8280100	9673400
sp|Q60931|VDAC3_MOUSE	sp|Q60931|VDAC3_MOUSE;tr|J3QMG3|J3QMG3_MOUSE	>sp|Q60931|VDAC3_MOUSE Voltage-dependent anion-selective channel protein 3 OS=Mus musculus OX=10090 GN=Vdac3 PE=1 SV=1;>tr|J3QMG3|J3QMG3_MOUSE Voltage-dependent anion-selective channel protein 3 OS=Mus musculus OX=10090 GN=Vdac3 PE=1 SV=1	2	12	30.752	10.182	1	4	3	4	1	4	1018900	2495600	1236700	3115500	1578800	1987600
sp|Q60932|VDAC1_MOUSE	sp|Q60932|VDAC1_MOUSE	>sp|Q60932|VDAC1_MOUSE Voltage-dependent anion-selective channel protein 1 OS=Mus musculus OX=10090 GN=Vdac1 PE=1 SV=3	3	49.3	32.351	56.215	16	14	14	16	14	17	19986000	30473000	22028000	33234000	26189000	24230000
sp|Q60936|COQ8A_MOUSE	sp|Q60936|COQ8A_MOUSE;tr|E0CXI5|E0CXI5_MOUSE;tr|E0CYD3|E0CYD3_MOUSE;tr|E0CYT4|E0CYT4_MOUSE;tr|E0CYG7|E0CYG7_MOUSE;tr|E0CZ05|E0CZ05_MOUSE;tr|E0CXT4|E0CXT4_MOUSE;tr|A0A0A6YXD9|A0A0A6YXD9_MOUSE;tr|E0CXR6|E0CXR6_MOUSE;tr|E0CYC1|E0CYC1_MOUSE;tr|E0CXR1|E0CXR1_MOUSE;tr|F6T0A8|F6T0A8_MOUSE	>sp|Q60936|COQ8A_MOUSE Atypical kinase COQ8A, mitochondrial OS=Mus musculus OX=10090 GN=Coq8a PE=1 SV=2;>tr|E0CXI5|E0CXI5_MOUSE Atypical kinase COQ8A, mitochondrial (Fragment) OS=Mus musculus OX=10090 GN=Coq8a PE=1 SV=1;>tr|E0CYD3|E0CYD3_MOUSE Atypical kin	2	4	71.742	5.6439	1	0	0	0	2	0	0	0	0	12279	199510	0
sp|Q60952|CP250_MOUSE	sp|Q60952|CP250_MOUSE;tr|E9Q5A8|E9Q5A8_MOUSE;tr|A3KGJ7|A3KGJ7_MOUSE	>sp|Q60952|CP250_MOUSE Centrosome-associated protein CEP250 OS=Mus musculus OX=10090 GN=Cep250 PE=1 SV=4;>tr|E9Q5A8|E9Q5A8_MOUSE Centrosome-associated protein CEP250 OS=Mus musculus OX=10090 GN=Cep250 PE=1 SV=1;>tr|A3KGJ7|A3KGJ7_MOUSE Centrosome-associated	5	2.7	276.81	10.95	0	1	0	2	1	2	64778	74802	39989	85678	79216	54979
sp|Q60953|PML_MOUSE	sp|Q60953|PML_MOUSE;tr|D3Z3A6|D3Z3A6_MOUSE;tr|D3YXR5|D3YXR5_MOUSE	>sp|Q60953|PML_MOUSE Protein PML OS=Mus musculus OX=10090 GN=Pml PE=1 SV=3;>tr|D3Z3A6|D3Z3A6_MOUSE Protein PML OS=Mus musculus OX=10090 GN=Pml PE=1 SV=1;>tr|D3YXR5|D3YXR5_MOUSE Protein PML OS=Mus musculus OX=10090 GN=Pml PE=1 SV=1	4	18.8	98.241	60.771	14	17	15	17	15	21	6167200	6917900	8280300	9220700	8291900	8926500
tr|G3UXT6|G3UXT6_MOUSE	tr|G3UXT6|G3UXT6_MOUSE;tr|G3UZK5|G3UZK5_MOUSE;sp|Q60960|IMA5_MOUSE	>tr|G3UXT6|G3UXT6_MOUSE Importin subunit alpha-5 OS=Mus musculus OX=10090 GN=Kpna1 PE=1 SV=1;>tr|G3UZK5|G3UZK5_MOUSE Importin subunit alpha-5 OS=Mus musculus OX=10090 GN=Kpna1 PE=1 SV=1;>sp|Q60960|IMA5_MOUSE Importin subunit alpha-5 OS=Mus musculus OX=1009	1	12.4	16.879	3.6095	2	1	1	1	1	2	1615200	1665900	1603400	4171700	1248100	2539000
sp|Q60972|RBBP4_MOUSE	sp|Q60972|RBBP4_MOUSE	>sp|Q60972|RBBP4_MOUSE Histone-binding protein RBBP4 OS=Mus musculus OX=10090 GN=Rbbp4 PE=1 SV=5	4	24	47.655	88.547	23	24	16	17	18	20	58975000	93012000	71121000	115340000	82694000	90053000
tr|A2AFJ1|A2AFJ1_MOUSE	tr|A2AFJ1|A2AFJ1_MOUSE;sp|Q60973|RBBP7_MOUSE;tr|A2AFI9|A2AFI9_MOUSE	>tr|A2AFJ1|A2AFJ1_MOUSE Histone-binding protein RBBP7 OS=Mus musculus OX=10090 GN=Rbbp7 PE=1 SV=1;>sp|Q60973|RBBP7_MOUSE Histone-binding protein RBBP7 OS=Mus musculus OX=10090 GN=Rbbp7 PE=1 SV=1;>tr|A2AFI9|A2AFI9_MOUSE Histone-binding protein RBBP7 OS=Mus	3	20.7	46.908	29.087	7	9	7	9	11	7	16972000	22512000	19415000	19965000	26087000	32712000
sp|Q61029|LAP2B_MOUSE	sp|Q61029|LAP2B_MOUSE	>sp|Q61029|LAP2B_MOUSE Lamina-associated polypeptide 2, isoforms beta/delta/epsilon/gamma OS=Mus musculus OX=10090 GN=Tmpo PE=1 SV=4	5	45.4	50.372	182.48	15	19	17	21	20	22	29830000	36276000	37674000	39611000	33113000	37406000
sp|Q61033|LAP2A_MOUSE	sp|Q61033|LAP2A_MOUSE	>sp|Q61033|LAP2A_MOUSE Lamina-associated polypeptide 2, isoforms alpha/zeta OS=Mus musculus OX=10090 GN=Tmpo PE=1 SV=4	4	22.7	75.167	11.422	3	2	2	3	1	3	827910	368890	288690	1433400	175170	1034300
sp|Q61035|SYHC_MOUSE	sp|Q61035|SYHC_MOUSE	>sp|Q61035|SYHC_MOUSE Histidine--tRNA ligase, cytoplasmic OS=Mus musculus OX=10090 GN=Hars PE=1 SV=2	8	24.6	57.432	29.365	13	8	6	9	7	10	4191400	5024100	4568400	4567200	3667700	4403600
tr|A0A1Y7VJC3|A0A1Y7VJC3_MOUSE	tr|A0A1Y7VJC3|A0A1Y7VJC3_MOUSE;tr|A0A1Y7VNC5|A0A1Y7VNC5_MOUSE;sp|Q61043|NIN_MOUSE;tr|A0A1Y7VIQ3|A0A1Y7VIQ3_MOUSE	>tr|A0A1Y7VJC3|A0A1Y7VJC3_MOUSE Ninein (Fragment) OS=Mus musculus OX=10090 GN=Nin PE=1 SV=1;>tr|A0A1Y7VNC5|A0A1Y7VNC5_MOUSE Ninein OS=Mus musculus OX=10090 GN=Nin PE=1 SV=1;>sp|Q61043|NIN_MOUSE Ninein OS=Mus musculus OX=10090 GN=Nin PE=1 SV=4;>tr|A0A1Y7VIQ	3	3.4	115.36	5.4745	0	1	1	0	0	0	0	0	0	78471	0	98462
tr|A0A0J9YVG0|A0A0J9YVG0_MOUSE	tr|A0A0J9YVG0|A0A0J9YVG0_MOUSE;sp|Q61074|PPM1G_MOUSE	>tr|A0A0J9YVG0|A0A0J9YVG0_MOUSE Protein phosphatase 1G OS=Mus musculus OX=10090 GN=Ppm1g PE=1 SV=1;>sp|Q61074|PPM1G_MOUSE Protein phosphatase 1G OS=Mus musculus OX=10090 GN=Ppm1g PE=1 SV=3	7	20.5	47.802	22.437	5	6	5	8	10	9	5828900	7100200	11414000	6107300	9355200	9212900
sp|Q61081|CDC37_MOUSE	sp|Q61081|CDC37_MOUSE;tr|A0A1L1STC0|A0A1L1STC0_MOUSE	>sp|Q61081|CDC37_MOUSE Hsp90 co-chaperone Cdc37 OS=Mus musculus OX=10090 GN=Cdc37 PE=1 SV=1;>tr|A0A1L1STC0|A0A1L1STC0_MOUSE Hsp90 co-chaperone Cdc37 (Fragment) OS=Mus musculus OX=10090 GN=Cdc37 PE=1 SV=1	14	34.8	44.593	112.48	16	24	23	24	20	25	34766000	40276000	54142000	90416000	54839000	65272000
sp|Q61103|REQU_MOUSE	sp|Q61103|REQU_MOUSE;tr|D3Z5N6|D3Z5N6_MOUSE;tr|F8WIP7|F8WIP7_MOUSE	>sp|Q61103|REQU_MOUSE Zinc finger protein ubi-d4 OS=Mus musculus OX=10090 GN=Dpf2 PE=1 SV=1;>tr|D3Z5N6|D3Z5N6_MOUSE Zinc finger protein ubi-d4 OS=Mus musculus OX=10090 GN=Dpf2 PE=1 SV=1;>tr|F8WIP7|F8WIP7_MOUSE Zinc finger protein ubi-d4 (Fragment) OS=Mus m	5	18.7	44.229	17.763	5	4	8	7	5	5	3317700	4193400	3455900	5479900	3979800	3598600
sp|Q61107|GBP4_MOUSE	sp|Q61107|GBP4_MOUSE	>sp|Q61107|GBP4_MOUSE Guanylate-binding protein 4 OS=Mus musculus OX=10090 GN=Gbp4 PE=1 SV=1	3	6.9	70.801	7.2303	1	3	1	1	2	2	738520	529240	711170	825060	835140	841140
tr|E9PZ64|E9PZ64_MOUSE	tr|E9PZ64|E9PZ64_MOUSE;tr|A0A087WSU4|A0A087WSU4_MOUSE;sp|Q61122|NAB1_MOUSE	>tr|E9PZ64|E9PZ64_MOUSE NGFI-A-binding protein 1 OS=Mus musculus OX=10090 GN=Nab1 PE=1 SV=1;>tr|A0A087WSU4|A0A087WSU4_MOUSE NGFI-A-binding protein 1 OS=Mus musculus OX=10090 GN=Nab1 PE=1 SV=1;>sp|Q61122|NAB1_MOUSE NGFI-A-binding protein 1 OS=Mus musculus O	1	3.3	50.774	3.8506	0	2	3	2	1	4	0	0	0	781960	756220	685090
sp|Q61127|NAB2_MOUSE	sp|Q61127|NAB2_MOUSE;tr|Q3TYF1|Q3TYF1_MOUSE	>sp|Q61127|NAB2_MOUSE NGFI-A-binding protein 2 OS=Mus musculus OX=10090 GN=Nab2 PE=1 SV=2;>tr|Q3TYF1|Q3TYF1_MOUSE NGFI-A-binding protein 2 OS=Mus musculus OX=10090 GN=Nab2 PE=1 SV=1	3	6.5	56.576	7.5403	0	1	0	1	2	1	956110	355470	388350	1240400	1705800	579440
tr|A0A1W2P7J9|A0A1W2P7J9_MOUSE	tr|A0A1W2P7J9|A0A1W2P7J9_MOUSE;sp|Q61133|GSTT2_MOUSE	>tr|A0A1W2P7J9|A0A1W2P7J9_MOUSE Glutathione S-transferase theta-2 (Fragment) OS=Mus musculus OX=10090 GN=Gstt2 PE=1 SV=1;>sp|Q61133|GSTT2_MOUSE Glutathione S-transferase theta-2 OS=Mus musculus OX=10090 GN=Gstt2 PE=1 SV=4	2	13.7	20.733	7.6134	3	1	3	1	3	2	1384000	1630400	1206400	1965800	1163600	1438500
sp|Q61136|PRP4B_MOUSE	sp|Q61136|PRP4B_MOUSE	>sp|Q61136|PRP4B_MOUSE Serine/threonine-protein kinase PRP4 homolog OS=Mus musculus OX=10090 GN=Prpf4b PE=1 SV=3	4	3.3	116.97	6.7861	0	0	1	1	2	1	160150	358580	217890	234620	491610	504970
sp|Q61142|SPIN1_MOUSE	sp|Q61142|SPIN1_MOUSE	>sp|Q61142|SPIN1_MOUSE Spindlin-1 OS=Mus musculus OX=10090 GN=Spin1 PE=1 SV=2	3	15.3	29.642	11.203	2	0	0	1	0	2	1841800	1521400	2099700	1688600	619950	4033800
sp|Q61152|PTN18_MOUSE	sp|Q61152|PTN18_MOUSE	>sp|Q61152|PTN18_MOUSE Tyrosine-protein phosphatase non-receptor type 18 OS=Mus musculus OX=10090 GN=Ptpn18 PE=1 SV=1	3	16.3	50.201	234.73	7	10	12	9	12	15	8236200	12588000	12323000	17152000	23769000	23430000
sp|Q61160|FADD_MOUSE	sp|Q61160|FADD_MOUSE	>sp|Q61160|FADD_MOUSE FAS-associated death domain protein OS=Mus musculus OX=10090 GN=Fadd PE=1 SV=1	3	16.1	22.96	8.8701	0	2	0	2	0	4	3612300	3116000	2626900	3932000	3266700	2669300
sp|Q61161|M4K2_MOUSE	sp|Q61161|M4K2_MOUSE	>sp|Q61161|M4K2_MOUSE Mitogen-activated protein kinase kinase kinase kinase 2 OS=Mus musculus OX=10090 GN=Map4k2 PE=1 SV=1	1	1.9	91.264	2.918	0	0	0	1	0	0	109770	119130	0	298630	0	68506
sp|Q61166|MARE1_MOUSE	sp|Q61166|MARE1_MOUSE	>sp|Q61166|MARE1_MOUSE Microtubule-associated protein RP/EB family member 1 OS=Mus musculus OX=10090 GN=Mapre1 PE=1 SV=3	12	56.3	30.016	171.75	14	21	22	21	25	25	43450000	58509000	59129000	66055000	64142000	73194000
sp|Q61171|PRDX2_MOUSE	sp|Q61171|PRDX2_MOUSE;tr|D3Z4A4|D3Z4A4_MOUSE	>sp|Q61171|PRDX2_MOUSE Peroxiredoxin-2 OS=Mus musculus OX=10090 GN=Prdx2 PE=1 SV=3;>tr|D3Z4A4|D3Z4A4_MOUSE Peroxiredoxin-2 (Fragment) OS=Mus musculus OX=10090 GN=Prdx2 PE=1 SV=8	7	33.3	21.778	50.245	16	20	16	20	23	21	60591000	95571000	67737000	112760000	91469000	88199000
sp|Q61179|IRF9_MOUSE	sp|Q61179|IRF9_MOUSE;tr|E9Q8M6|E9Q8M6_MOUSE;tr|E9PZJ2|E9PZJ2_MOUSE	>sp|Q61179|IRF9_MOUSE Interferon regulatory factor 9 OS=Mus musculus OX=10090 GN=Irf9 PE=1 SV=1;>tr|E9Q8M6|E9Q8M6_MOUSE Interferon regulatory factor 9 OS=Mus musculus OX=10090 GN=Irf9 PE=1 SV=1;>tr|E9PZJ2|E9PZJ2_MOUSE Interferon regulatory factor 9 OS=Mus	4	13.5	44.61	12.209	3	3	3	2	2	3	2435600	2931700	2808400	1441000	1880800	2329900
tr|E9Q5Z1|E9Q5Z1_MOUSE	tr|E9Q5Z1|E9Q5Z1_MOUSE;tr|E9PVN7|E9PVN7_MOUSE;tr|E9QAY4|E9QAY4_MOUSE;tr|A0A0R4J244|A0A0R4J244_MOUSE;tr|E9PWC8|E9PWC8_MOUSE;tr|E9PZR3|E9PZR3_MOUSE;tr|E9QAN2|E9QAN2_MOUSE;sp|Q61183|PAPOA_MOUSE	>tr|E9Q5Z1|E9Q5Z1_MOUSE Poly(A) polymerase alpha OS=Mus musculus OX=10090 GN=Papola PE=1 SV=1;>tr|E9PVN7|E9PVN7_MOUSE Poly(A) polymerase alpha OS=Mus musculus OX=10090 GN=Papola PE=1 SV=1;>tr|E9QAY4|E9QAY4_MOUSE Poly(A) polymerase alpha OS=Mus musculus OX=	1	25.8	7.5064	3.7802	0	1	0	0	0	1	0	3987800	0	0	0	2615400
sp|Q61191|HCFC1_MOUSE	sp|Q61191|HCFC1_MOUSE;tr|B1AUX2|B1AUX2_MOUSE	>sp|Q61191|HCFC1_MOUSE Host cell factor 1 OS=Mus musculus OX=10090 GN=Hcfc1 PE=1 SV=2;>tr|B1AUX2|B1AUX2_MOUSE Host cell factor 1 OS=Mus musculus OX=10090 GN=Hcfc1 PE=1 SV=1	22	18.5	210.43	79.803	23	21	19	18	21	23	8355100	12337000	9873200	12753000	9773900	11632000
tr|D3Z2X5|D3Z2X5_MOUSE	tr|D3Z2X5|D3Z2X5_MOUSE;sp|Q61205|PA1B3_MOUSE;tr|Q8CA83|Q8CA83_MOUSE;tr|D3Z7E6|D3Z7E6_MOUSE	>tr|D3Z2X5|D3Z2X5_MOUSE Platelet-activating factor acetylhydrolase IB subunit gamma (Fragment) OS=Mus musculus OX=10090 GN=Pafah1b3 PE=1 SV=1;>sp|Q61205|PA1B3_MOUSE Platelet-activating factor acetylhydrolase IB subunit gamma OS=Mus musculus OX=10090 GN=Paf	2	21.7	15.893	14.7	2	4	2	3	2	3	1826300	6375600	700850	3679900	1087500	5850200
tr|A0A1L1SVK0|A0A1L1SVK0_MOUSE	tr|A0A1L1SVK0|A0A1L1SVK0_MOUSE;sp|Q61206|PA1B2_MOUSE;tr|A0A1L1SQ76|A0A1L1SQ76_MOUSE;tr|A0A1L1SRD0|A0A1L1SRD0_MOUSE;tr|A0A1L1SQV7|A0A1L1SQV7_MOUSE	>tr|A0A1L1SVK0|A0A1L1SVK0_MOUSE Platelet-activating factor acetylhydrolase IB subunit beta (Fragment) OS=Mus musculus OX=10090 GN=Pafah1b2 PE=1 SV=1;>sp|Q61206|PA1B2_MOUSE Platelet-activating factor acetylhydrolase IB subunit beta OS=Mus musculus OX=10090	3	25.4	22.056	35.835	5	2	4	5	4	5	13644000	2968500	8104500	9770300	6440000	8497200
tr|E9PZ00|E9PZ00_MOUSE	tr|E9PZ00|E9PZ00_MOUSE;tr|Q8BFQ1|Q8BFQ1_MOUSE;tr|K3W4L3|K3W4L3_MOUSE;tr|J3QPG5|J3QPG5_MOUSE;sp|Q61207|SAP_MOUSE	>tr|E9PZ00|E9PZ00_MOUSE Prosaposin OS=Mus musculus OX=10090 GN=Psap PE=1 SV=1;>tr|Q8BFQ1|Q8BFQ1_MOUSE Prosaposin OS=Mus musculus OX=10090 GN=Psap PE=1 SV=1;>tr|K3W4L3|K3W4L3_MOUSE Prosaposin OS=Mus musculus OX=10090 GN=Psap PE=1 SV=1;>tr|J3QPG5|J3QPG5_MOUS	3	5.6	60.672	8.0133	4	2	3	4	3	3	11857000	11895000	10482000	20911000	18304000	15715000
sp|Q61233|PLSL_MOUSE	sp|Q61233|PLSL_MOUSE	>sp|Q61233|PLSL_MOUSE Plastin-2 OS=Mus musculus OX=10090 GN=Lcp1 PE=1 SV=4	34	57.4	70.148	323.31	85	94	97	96	96	101	220180000	259520000	241920000	278560000	225160000	288320000
sp|Q61249|IGBP1_MOUSE	sp|Q61249|IGBP1_MOUSE	>sp|Q61249|IGBP1_MOUSE Immunoglobulin-binding protein 1 OS=Mus musculus OX=10090 GN=Igbp1 PE=1 SV=1	7	28.5	38.97	29.799	5	4	7	10	8	4	3148100	4200400	2702800	5793300	4948100	5073400
tr|F7ABX5|F7ABX5_MOUSE	tr|F7ABX5|F7ABX5_MOUSE;tr|Q3U9H3|Q3U9H3_MOUSE;tr|D3YZR8|D3YZR8_MOUSE;sp|Q61337|BAD_MOUSE	>tr|F7ABX5|F7ABX5_MOUSE Bcl2-associated agonist of cell death (Fragment) OS=Mus musculus OX=10090 GN=Bad PE=1 SV=1;>tr|Q3U9H3|Q3U9H3_MOUSE Bcl-associated death promoter, isoform CRA_a OS=Mus musculus OX=10090 GN=Bad PE=1 SV=1;>tr|D3YZR8|D3YZR8_MOUSE Bcl2-a	1	18	17.245	5.7125	0	1	1	1	0	1	1014500	1096000	1076300	3001800	2486800	2181100
sp|Q61425|HCDH_MOUSE	sp|Q61425|HCDH_MOUSE	>sp|Q61425|HCDH_MOUSE Hydroxyacyl-coenzyme A dehydrogenase, mitochondrial OS=Mus musculus OX=10090 GN=Hadh PE=1 SV=2	2	7.6	34.463	8.3448	2	2	3	3	2	2	1672400	2217600	1788900	3704000	1351300	1797600
sp|Q61503|5NTD_MOUSE	sp|Q61503|5NTD_MOUSE	>sp|Q61503|5NTD_MOUSE 5-nucleotidase OS=Mus musculus OX=10090 GN=Nt5e PE=1 SV=2	8	14.8	63.864	22.942	4	4	2	4	3	4	1106900	2158900	786640	1454000	1620700	1734400
tr|Q5SUT0|Q5SUT0_MOUSE	tr|Q5SUT0|Q5SUT0_MOUSE;sp|Q61545|EWS_MOUSE;tr|Q5SUS9|Q5SUS9_MOUSE	>tr|Q5SUT0|Q5SUT0_MOUSE RNA-binding protein EWS OS=Mus musculus OX=10090 GN=Ewsr1 PE=1 SV=1;>sp|Q61545|EWS_MOUSE RNA-binding protein EWS OS=Mus musculus OX=10090 GN=Ewsr1 PE=1 SV=2;>tr|Q5SUS9|Q5SUS9_MOUSE RNA-binding protein EWS OS=Mus musculus OX=10090 GN	7	17	64.988	217.81	13	16	14	16	18	11	54495000	76529000	66535000	88240000	94682000	103380000
sp|Q61550|RAD21_MOUSE	sp|Q61550|RAD21_MOUSE	>sp|Q61550|RAD21_MOUSE Double-strand-break repair protein rad21 homolog OS=Mus musculus OX=10090 GN=Rad21 PE=1 SV=3	11	27.1	72.082	62.552	5	8	11	11	7	6	3653800	3366500	3701000	7046400	5087300	4845000
tr|F7BDR1|F7BDR1_MOUSE	tr|F7BDR1|F7BDR1_MOUSE;tr|A0A0G2JDU7|A0A0G2JDU7_MOUSE;sp|Q61553|FSCN1_MOUSE	>tr|F7BDR1|F7BDR1_MOUSE Fascin (Fragment) OS=Mus musculus OX=10090 GN=Fscn1 PE=1 SV=1;>tr|A0A0G2JDU7|A0A0G2JDU7_MOUSE Fascin OS=Mus musculus OX=10090 GN=Fscn1 PE=1 SV=1;>sp|Q61553|FSCN1_MOUSE Fascin OS=Mus musculus OX=10090 GN=Fscn1 PE=1 SV=4	1	4.1	26.658	2.6612	1	1	0	0	0	0	0	178290	0	0	0	0
sp|Q61578|ADRO_MOUSE	sp|Q61578|ADRO_MOUSE	>sp|Q61578|ADRO_MOUSE NADPH:adrenodoxin oxidoreductase, mitochondrial OS=Mus musculus OX=10090 GN=Fdxr PE=1 SV=1	9	22.9	54.201	56.069	4	9	6	8	6	7	4250400	3350000	2632800	7046700	4291400	4182000
tr|A0A0G2JEP0|A0A0G2JEP0_MOUSE	tr|A0A0G2JEP0|A0A0G2JEP0_MOUSE;sp|Q61584|FXR1_MOUSE;tr|A0A0H2UH27|A0A0H2UH27_MOUSE	>tr|A0A0G2JEP0|A0A0G2JEP0_MOUSE Fragile X mental retardation syndrome-related protein 1 OS=Mus musculus OX=10090 GN=Fxr1 PE=1 SV=1;>sp|Q61584|FXR1_MOUSE Fragile X mental retardation syndrome-related protein 1 OS=Mus musculus OX=10090 GN=Fxr1 PE=1 SV=2;>tr|	4	13	63.915	15.842	4	4	3	3	3	3	1478700	1820900	1035400	1239500	752820	1301500
sp|Q61598|GDIB_MOUSE	sp|Q61598|GDIB_MOUSE;tr|A0A1Y7VL99|A0A1Y7VL99_MOUSE	>sp|Q61598|GDIB_MOUSE Rab GDP dissociation inhibitor beta OS=Mus musculus OX=10090 GN=Gdi2 PE=1 SV=1;>tr|A0A1Y7VL99|A0A1Y7VL99_MOUSE Rab GDP dissociation inhibitor (Fragment) OS=Mus musculus OX=10090 GN=Gdi2 PE=1 SV=1	14	41.6	50.537	92.97	22	27	23	23	19	20	29243000	23010000	20213000	28736000	23825000	26738000
sp|Q61599|GDIR2_MOUSE	sp|Q61599|GDIR2_MOUSE	>sp|Q61599|GDIR2_MOUSE Rho GDP-dissociation inhibitor 2 OS=Mus musculus OX=10090 GN=Arhgdib PE=1 SV=3	16	73.5	22.851	323.31	48	59	61	67	62	64	481590000	782250000	691610000	1299700000	827570000	939230000
sp|Q61624|ZN148_MOUSE	sp|Q61624|ZN148_MOUSE;tr|A0A338P6K3|A0A338P6K3_MOUSE	>sp|Q61624|ZN148_MOUSE Zinc finger protein 148 OS=Mus musculus OX=10090 GN=Znf148 PE=1 SV=2;>tr|A0A338P6K3|A0A338P6K3_MOUSE Zinc finger protein 148 OS=Mus musculus OX=10090 GN=Zfp148 PE=1 SV=1	5	9.9	88.75	14.976	2	2	3	2	2	3	301760	1872100	578520	1110700	810330	722540
sp|Q61625|GRID2_MOUSE	sp|Q61625|GRID2_MOUSE	>sp|Q61625|GRID2_MOUSE Glutamate receptor ionotropic, delta-2 OS=Mus musculus OX=10090 GN=Grid2 PE=1 SV=1	1	1.3	113.08	2.6589	0	3	1	0	0	0	146710	238180	156200	206650	225300	259450
sp|Q61644|PACN1_MOUSE	sp|Q61644|PACN1_MOUSE;tr|A0A384DVB1|A0A384DVB1_MOUSE	>sp|Q61644|PACN1_MOUSE Protein kinase C and casein kinase substrate in neurons protein 1 OS=Mus musculus OX=10090 GN=Pacsin1 PE=1 SV=1;>tr|A0A384DVB1|A0A384DVB1_MOUSE Protein kinase C and casein kinase substrate in neurons protein 1 (Fragment) OS=Mus muscu	9	31.5	50.575	70.275	2	4	5	10	8	7	3878600	3695600	5893900	8285100	7483000	5681100
sp|Q61655|DD19A_MOUSE	sp|Q61655|DD19A_MOUSE;tr|Q8R3C7|Q8R3C7_MOUSE;tr|Q8BZY3|Q8BZY3_MOUSE	>sp|Q61655|DD19A_MOUSE ATP-dependent RNA helicase DDX19A OS=Mus musculus OX=10090 GN=Ddx19a PE=1 SV=2;>tr|Q8R3C7|Q8R3C7_MOUSE DEAD (Asp-Glu-Ala-Asp) box polypeptide 19b OS=Mus musculus OX=10090 GN=Ddx19b PE=1 SV=1;>tr|Q8BZY3|Q8BZY3_MOUSE DEAD (Asp-Glu-Ala-	6	18.2	53.932	68.199	5	3	4	8	1	4	2397700	2810400	2933100	3938100	3455900	3318700
sp|Q61656|DDX5_MOUSE	sp|Q61656|DDX5_MOUSE;tr|Q8BTS0|Q8BTS0_MOUSE;tr|S4R1I6|S4R1I6_MOUSE	>sp|Q61656|DDX5_MOUSE Probable ATP-dependent RNA helicase DDX5 OS=Mus musculus OX=10090 GN=Ddx5 PE=1 SV=2;>tr|Q8BTS0|Q8BTS0_MOUSE DEAD (Asp-Glu-Ala-Asp) box polypeptide 5 OS=Mus musculus OX=10090 GN=Ddx5 PE=1 SV=1;>tr|S4R1I6|S4R1I6_MOUSE MCG2872, isoform C	16	38.3	69.289	147.58	31	36	33	30	29	38	28338000	38781000	30794000	33089000	29237000	28118000
sp|Q61686|CBX5_MOUSE	sp|Q61686|CBX5_MOUSE	>sp|Q61686|CBX5_MOUSE Chromobox protein homolog 5 OS=Mus musculus OX=10090 GN=Cbx5 PE=1 SV=1	4	30.9	22.186	11.095	3	5	4	6	4	3	11421000	15497000	15513000	15957000	16345000	18186000
sp|Q61687|ATRX_MOUSE	sp|Q61687|ATRX_MOUSE	>sp|Q61687|ATRX_MOUSE Transcriptional regulator ATRX OS=Mus musculus OX=10090 GN=Atrx PE=1 SV=3	5	3.3	278.58	13.88	2	1	3	2	1	1	215730	336290	244790	280050	251350	213260
tr|E9Q0U7|E9Q0U7_MOUSE	tr|E9Q0U7|E9Q0U7_MOUSE;sp|Q61699|HS105_MOUSE	>tr|E9Q0U7|E9Q0U7_MOUSE Heat shock protein 105 kDa OS=Mus musculus OX=10090 GN=Hsph1 PE=1 SV=1;>sp|Q61699|HS105_MOUSE Heat shock protein 105 kDa OS=Mus musculus OX=10090 GN=Hsph1 PE=1 SV=2	12	21.4	91.677	58.062	7	7	9	10	14	9	4242600	5125700	5034500	6935400	5670600	6352500
sp|Q61753|SERA_MOUSE	sp|Q61753|SERA_MOUSE	>sp|Q61753|SERA_MOUSE D-3-phosphoglycerate dehydrogenase OS=Mus musculus OX=10090 GN=Phgdh PE=1 SV=3	15	33.2	56.585	88.938	18	20	19	22	17	21	34400000	34275000	29378000	35754000	30879000	34428000
sp|Q61768|KINH_MOUSE	sp|Q61768|KINH_MOUSE;tr|E9QAK5|E9QAK5_MOUSE	>sp|Q61768|KINH_MOUSE Kinesin-1 heavy chain OS=Mus musculus OX=10090 GN=Kif5b PE=1 SV=3;>tr|E9QAK5|E9QAK5_MOUSE Kinesin-like protein (Fragment) OS=Mus musculus OX=10090 GN=Kif5b PE=1 SV=1	10	13.6	109.55	30.544	7	3	5	6	7	4	1631600	1621300	810260	1155700	1519200	1526100
sp|Q61792|LASP1_MOUSE	sp|Q61792|LASP1_MOUSE;tr|A2A6H0|A2A6H0_MOUSE;tr|A2A6G9|A2A6G9_MOUSE;tr|A2A6G7|A2A6G7_MOUSE;tr|A2A6G8|A2A6G8_MOUSE	>sp|Q61792|LASP1_MOUSE LIM and SH3 domain protein 1 OS=Mus musculus OX=10090 GN=Lasp1 PE=1 SV=1;>tr|A2A6H0|A2A6H0_MOUSE LIM and SH3 domain protein 1 (Fragment) OS=Mus musculus OX=10090 GN=Lasp1 PE=1 SV=1;>tr|A2A6G9|A2A6G9_MOUSE LIM and SH3 domain protein 1	9	40.3	29.994	176.78	27	23	25	21	27	22	160990000	186760000	141930000	241470000	222080000	181370000
sp|Q61823|PDCD4_MOUSE	sp|Q61823|PDCD4_MOUSE	>sp|Q61823|PDCD4_MOUSE Programmed cell death protein 4 OS=Mus musculus OX=10090 GN=Pdcd4 PE=1 SV=1	10	27.3	51.702	59.299	7	14	10	12	12	11	15522000	25178000	19484000	27676000	27009000	18327000
sp|Q61881|MCM7_MOUSE	sp|Q61881|MCM7_MOUSE	>sp|Q61881|MCM7_MOUSE DNA replication licensing factor MCM7 OS=Mus musculus OX=10090 GN=Mcm7 PE=1 SV=1	13	24.9	81.21	54.475	10	9	10	12	10	11	4823200	5522200	5459600	8045900	5812700	5902100
tr|Q5SQB0|Q5SQB0_MOUSE	tr|Q5SQB0|Q5SQB0_MOUSE;sp|Q61937|NPM_MOUSE;tr|Q9DAY9|Q9DAY9_MOUSE;tr|Q5SQB5|Q5SQB5_MOUSE	>tr|Q5SQB0|Q5SQB0_MOUSE Nucleophosmin OS=Mus musculus OX=10090 GN=Npm1 PE=1 SV=1;>sp|Q61937|NPM_MOUSE Nucleophosmin OS=Mus musculus OX=10090 GN=Npm1 PE=1 SV=1;>tr|Q9DAY9|Q9DAY9_MOUSE Nucleophosmin OS=Mus musculus OX=10090 GN=Npm1 PE=1 SV=1;>tr|Q5SQB5|Q5SQB	9	47	29.524	164.64	13	24	21	38	29	28	145580000	181820000	171020000	300120000	173680000	185160000
tr|E9Q8F4|E9Q8F4_MOUSE	tr|E9Q8F4|E9Q8F4_MOUSE;tr|Q8C9V5|Q8C9V5_MOUSE;tr|Q8BGK0|Q8BGK0_MOUSE;sp|Q61941|NNTM_MOUSE	>tr|E9Q8F4|E9Q8F4_MOUSE NAD(P) transhydrogenase, mitochondrial OS=Mus musculus OX=10090 GN=Nnt PE=1 SV=1;>tr|Q8C9V5|Q8C9V5_MOUSE NAD(P) transhydrogenase, mitochondrial OS=Mus musculus OX=10090 GN=Nnt PE=1 SV=1;>tr|Q8BGK0|Q8BGK0_MOUSE NAD(P) transhydrogenas	1	1.8	74.325	2.8068	1	1	0	1	1	1	88882	104880	109670	111890	129690	156770
tr|B2M1R7|B2M1R7_MOUSE	tr|B2M1R7|B2M1R7_MOUSE;sp|Q61990|PCBP2_MOUSE;tr|A0A2R8VI25|A0A2R8VI25_MOUSE;tr|A0A2R8W6L5|A0A2R8W6L5_MOUSE;tr|A0A2R8VI12|A0A2R8VI12_MOUSE;tr|A0A2R8VHP9|A0A2R8VHP9_MOUSE;tr|A0A2R8VI71|A0A2R8VI71_MOUSE;tr|A0A2R8VHY9|A0A2R8VHY9_MOUSE;tr|Q3TT81|Q3TT81_MOUSE;tr|A0A2R8VHN3|A0A2R8VHN3_MOUSE;tr|A0A2R8VHG2|A0A2R8VHG2_MOUSE;tr|A0A2R8VJY1|A0A2R8VJY1_MOUSE;tr|A0A2R8VHZ0|A0A2R8VHZ0_MOUSE;tr|A0A2R8VKN0|A0A2R8V…	>tr|B2M1R7|B2M1R7_MOUSE Poly(rC)-binding protein 2 OS=Mus musculus OX=10090 GN=Pcbp2 PE=1 SV=1;>sp|Q61990|PCBP2_MOUSE Poly(rC)-binding protein 2 OS=Mus musculus OX=10090 GN=Pcbp2 PE=1 SV=1;>tr|A0A2R8VI25|A0A2R8VI25_MOUSE Poly(RC) binding protein 2, isoform	7	45.7	38.15	49.365	6	8	13	7	8	13	23136000	32318000	25031000	36520000	30043000	42871000
sp|Q62018|CTR9_MOUSE	sp|Q62018|CTR9_MOUSE	>sp|Q62018|CTR9_MOUSE RNA polymerase-associated protein CTR9 homolog OS=Mus musculus OX=10090 GN=Ctr9 PE=1 SV=2	4	4.9	133.41	12.758	2	3	6	1	4	4	189860	52609	161840	375530	276360	408160
sp|Q62048|PEA15_MOUSE	sp|Q62048|PEA15_MOUSE;tr|D3Z375|D3Z375_MOUSE	>sp|Q62048|PEA15_MOUSE Astrocytic phosphoprotein PEA-15 OS=Mus musculus OX=10090 GN=Pea15 PE=1 SV=1;>tr|D3Z375|D3Z375_MOUSE Phosphoprotein-enriched in astrocytes 15A (Fragment) OS=Mus musculus OX=10090 GN=Pea15a PE=1 SV=1	2	16.9	15.054	7.4137	0	0	1	1	1	2	7690700	5460500	6042900	8639800	6540100	16116000
tr|A2A4A6|A2A4A6_MOUSE	tr|A2A4A6|A2A4A6_MOUSE;sp|Q62077|PLCG1_MOUSE	>tr|A2A4A6|A2A4A6_MOUSE 1-phosphatidylinositol 4,5-bisphosphate phosphodiesterase gamma OS=Mus musculus OX=10090 GN=Plcg1 PE=1 SV=1;>sp|Q62077|PLCG1_MOUSE 1-phosphatidylinositol 4,5-bisphosphate phosphodiesterase gamma-1 OS=Mus musculus OX=10090 GN=Plcg1 P	5	5	148.53	13.376	2	2	0	1	5	2	332430	603810	210300	316870	926280	491790
sp|Q62084|PP14B_MOUSE	sp|Q62084|PP14B_MOUSE	>sp|Q62084|PP14B_MOUSE Protein phosphatase 1 regulatory subunit 14B OS=Mus musculus OX=10090 GN=Ppp1r14b PE=1 SV=2	2	34.7	15.957	69.443	3	3	4	4	2	3	11873000	19476000	16078000	17015000	18577000	14269000
sp|Q62093|SRSF2_MOUSE	sp|Q62093|SRSF2_MOUSE	>sp|Q62093|SRSF2_MOUSE Serine/arginine-rich splicing factor 2 OS=Mus musculus OX=10090 GN=Srsf2 PE=1 SV=4	6	24	25.476	282.58	20	18	23	23	21	28	234540000	299740000	279810000	324250000	296620000	327010000
sp|Q62095|DDX3Y_MOUSE	sp|Q62095|DDX3Y_MOUSE	>sp|Q62095|DDX3Y_MOUSE ATP-dependent RNA helicase DDX3Y OS=Mus musculus OX=10090 GN=Ddx3y PE=1 SV=2	1	13.7	73.427	2.9794	3	2	1	1	1	1	166500	240300	270030	248570	242110	218790
tr|A0A1Y7VKW0|A0A1Y7VKW0_MOUSE	tr|A0A1Y7VKW0|A0A1Y7VKW0_MOUSE;tr|A0A1Y7VJ13|A0A1Y7VJ13_MOUSE;sp|Q62158|TRI27_MOUSE	>tr|A0A1Y7VKW0|A0A1Y7VKW0_MOUSE Zinc finger protein RFP OS=Mus musculus OX=10090 GN=Trim27 PE=1 SV=1;>tr|A0A1Y7VJ13|A0A1Y7VJ13_MOUSE Zinc finger protein RFP OS=Mus musculus OX=10090 GN=Trim27 PE=1 SV=1;>sp|Q62158|TRI27_MOUSE Zinc finger protein RFP OS=Mus	1	3.8	36.247	2.6687	0	0	1	0	0	1	565300	791070	751470	813390	830030	762430
sp|Q62167|DDX3X_MOUSE	sp|Q62167|DDX3X_MOUSE;sp|P16381|DDX3L_MOUSE	>sp|Q62167|DDX3X_MOUSE ATP-dependent RNA helicase DDX3X OS=Mus musculus OX=10090 GN=Ddx3x PE=1 SV=3;>sp|P16381|DDX3L_MOUSE Putative ATP-dependent RNA helicase Pl10 OS=Mus musculus OX=10090 GN=D1Pas1 PE=1 SV=1	2	16	73.101	22.983	4	3	2	1	2	4	1696500	2519000	2095100	1159100	1256900	1115200
sp|Q62186|SSRD_MOUSE	sp|Q62186|SSRD_MOUSE;tr|Q9D8L3|Q9D8L3_MOUSE	>sp|Q62186|SSRD_MOUSE Translocon-associated protein subunit delta OS=Mus musculus OX=10090 GN=Ssr4 PE=1 SV=1;>tr|Q9D8L3|Q9D8L3_MOUSE Signal sequence receptor, delta OS=Mus musculus OX=10090 GN=Ssr4 PE=1 SV=1	4	30.8	18.936	26.725	5	5	7	5	6	7	23871000	16406000	21149000	30148000	27522000	46265000
sp|Q62189|SNRPA_MOUSE	sp|Q62189|SNRPA_MOUSE;tr|D3Z0S6|D3Z0S6_MOUSE	>sp|Q62189|SNRPA_MOUSE U1 small nuclear ribonucleoprotein A OS=Mus musculus OX=10090 GN=Snrpa PE=1 SV=3;>tr|D3Z0S6|D3Z0S6_MOUSE U1 small nuclear ribonucleoprotein A (Fragment) OS=Mus musculus OX=10090 GN=Snrpa PE=1 SV=1	3	24	31.835	15.512	2	3	3	4	4	4	9397900	1848500	1798700	3188600	2321300	3178400
tr|Q3U7K7|Q3U7K7_MOUSE	tr|Q3U7K7|Q3U7K7_MOUSE;sp|Q62191|RO52_MOUSE	>tr|Q3U7K7|Q3U7K7_MOUSE E3 ubiquitin-protein ligase TRIM21 OS=Mus musculus OX=10090 GN=Trim21 PE=1 SV=1;>sp|Q62191|RO52_MOUSE E3 ubiquitin-protein ligase TRIM21 OS=Mus musculus OX=10090 GN=Trim21 PE=1 SV=1	2	5	53.327	21.393	3	3	3	2	1	3	900720	1024200	923120	832560	1103600	1111600
tr|Q3TE40|Q3TE40_MOUSE	tr|Q3TE40|Q3TE40_MOUSE;sp|Q62193|RFA2_MOUSE	>tr|Q3TE40|Q3TE40_MOUSE Replication protein A 32 kDa subunit OS=Mus musculus OX=10090 GN=Rpa2 PE=1 SV=1;>sp|Q62193|RFA2_MOUSE Replication protein A 32 kDa subunit OS=Mus musculus OX=10090 GN=Rpa2 PE=1 SV=1	3	17	29.44	11.214	1	1	1	4	1	2	6583500	3824400	4990900	27420000	5184900	14253000
sp|Q62203|SF3A2_MOUSE	sp|Q62203|SF3A2_MOUSE;tr|G3UVU2|G3UVU2_MOUSE;tr|D3YW09|D3YW09_MOUSE;tr|D3Z5A6|D3Z5A6_MOUSE	>sp|Q62203|SF3A2_MOUSE Splicing factor 3A subunit 2 OS=Mus musculus OX=10090 GN=Sf3a2 PE=1 SV=2;>tr|G3UVU2|G3UVU2_MOUSE Splicing factor 3A subunit 2 OS=Mus musculus OX=10090 GN=Sf3a2 PE=1 SV=1;>tr|D3YW09|D3YW09_MOUSE Splicing factor 3A subunit 2 OS=Mus mus	4	11.2	49.911	13.567	5	5	7	6	5	6	21998000	14658000	22905000	17062000	17126000	30594000
sp|Q62241|RU1C_MOUSE	sp|Q62241|RU1C_MOUSE;tr|A0A3B2W450|A0A3B2W450_MOUSE;tr|A0A3B2WCR6|A0A3B2WCR6_MOUSE	>sp|Q62241|RU1C_MOUSE U1 small nuclear ribonucleoprotein C OS=Mus musculus OX=10090 GN=Snrpc PE=1 SV=1;>tr|A0A3B2W450|A0A3B2W450_MOUSE U1 small nuclear ribonucleoprotein C OS=Mus musculus OX=10090 GN=Snrpc PE=1 SV=1;>tr|A0A3B2WCR6|A0A3B2WCR6_MOUSE U1 small	2	18.9	17.364	9.5627	1	1	1	2	2	1	10768000	9188400	8285700	13350000	8121700	2154800
sp|Q62261|SPTB2_MOUSE	sp|Q62261|SPTB2_MOUSE;tr|A0A0A0MQG2|A0A0A0MQG2_MOUSE	>sp|Q62261|SPTB2_MOUSE Spectrin beta chain, non-erythrocytic 1 OS=Mus musculus OX=10090 GN=Sptbn1 PE=1 SV=2;>tr|A0A0A0MQG2|A0A0A0MQG2_MOUSE Spectrin beta chain, non-erythrocytic 1 (Fragment) OS=Mus musculus OX=10090 GN=Sptbn1 PE=1 SV=1	40	22.9	274.22	159.72	31	33	37	40	39	31	2219300	3246100	3368100	6193600	3521900	4827100
tr|A2ALA4|A2ALA4_MOUSE	tr|A2ALA4|A2ALA4_MOUSE;sp|Q62276|MED22_MOUSE	>tr|A2ALA4|A2ALA4_MOUSE Mediator of RNA polymerase II transcription subunit 22 (Fragment) OS=Mus musculus OX=10090 GN=Med22 PE=1 SV=1;>sp|Q62276|MED22_MOUSE Mediator of RNA polymerase II transcription subunit 22 OS=Mus musculus OX=10090 GN=Med22 PE=1 SV=2	1	8.3	19.562	4.0381	3	0	0	0	3	1	0	0	0	555120	899370	0
tr|A0A3Q4EI07|A0A3Q4EI07_MOUSE	tr|A0A3Q4EI07|A0A3Q4EI07_MOUSE;tr|A0A3Q4EGQ6|A0A3Q4EGQ6_MOUSE;tr|Q8VHA8|Q8VHA8_MOUSE;tr|Q8BKL1|Q8BKL1_MOUSE;tr|Q8BJJ6|Q8BJJ6_MOUSE;sp|Q62280|SSXT_MOUSE	>tr|A0A3Q4EI07|A0A3Q4EI07_MOUSE Protein SSXT OS=Mus musculus OX=10090 GN=Ss18 PE=4 SV=1;>tr|A0A3Q4EGQ6|A0A3Q4EGQ6_MOUSE Protein SSXT OS=Mus musculus OX=10090 GN=Ss18 PE=4 SV=1;>tr|Q8VHA8|Q8VHA8_MOUSE Protein SSXT OS=Mus musculus OX=10090 GN=Ss18 PE=2 SV=1;	1	19.5	4.3771	2.8717	1	1	1	1	2	1	13734000	12862000	10711000	16184000	18318000	15549000
sp|Q62318|TIF1B_MOUSE	sp|Q62318|TIF1B_MOUSE	>sp|Q62318|TIF1B_MOUSE Transcription intermediary factor 1-beta OS=Mus musculus OX=10090 GN=Trim28 PE=1 SV=3	20	40.3	88.846	297.19	32	45	47	56	43	52	37941000	56668000	44923000	92265000	51413000	55151000
sp|Q62348|TSN_MOUSE	sp|Q62348|TSN_MOUSE	>sp|Q62348|TSN_MOUSE Translin OS=Mus musculus OX=10090 GN=Tsn PE=1 SV=1	6	35.5	26.201	15.712	2	3	3	3	4	3	4583400	4255400	11753000	4214800	4248200	3513200
sp|Q62376|RU17_MOUSE	sp|Q62376|RU17_MOUSE;tr|A0A1B0GRR8|A0A1B0GRR8_MOUSE;tr|A0A1B0GR69|A0A1B0GR69_MOUSE;tr|A0A1B0GR44|A0A1B0GR44_MOUSE	>sp|Q62376|RU17_MOUSE U1 small nuclear ribonucleoprotein 70 kDa OS=Mus musculus OX=10090 GN=Snrnp70 PE=1 SV=2;>tr|A0A1B0GRR8|A0A1B0GRR8_MOUSE U1 small nuclear ribonucleoprotein 70 kDa (Fragment) OS=Mus musculus OX=10090 GN=Snrnp70 PE=1 SV=1;>tr|A0A1B0GR69|	8	19.9	51.991	43.439	15	13	15	13	13	15	27008000	27148000	25034000	31403000	33772000	31641000
sp|Q62383|SPT6H_MOUSE	sp|Q62383|SPT6H_MOUSE	>sp|Q62383|SPT6H_MOUSE Transcription elongation factor SPT6 OS=Mus musculus OX=10090 GN=Supt6h PE=1 SV=2	17	13.5	199.08	66.177	12	8	9	15	9	9	1362100	1349300	1425300	2161400	1433400	1825400
tr|F8WHU9|F8WHU9_MOUSE	tr|F8WHU9|F8WHU9_MOUSE;sp|Q62384|ZPR1_MOUSE	>tr|F8WHU9|F8WHU9_MOUSE Zinc finger protein ZPR1 (Fragment) OS=Mus musculus OX=10090 GN=Zpr1 PE=1 SV=1;>sp|Q62384|ZPR1_MOUSE Zinc finger protein ZPR1 OS=Mus musculus OX=10090 GN=Zpr1 PE=1 SV=1	6	23.3	42.327	15.652	0	1	2	10	7	6	827710	1464300	994970	3081200	2383900	2381900
tr|D3Z125|D3Z125_MOUSE	tr|D3Z125|D3Z125_MOUSE;tr|E9PUA7|E9PUA7_MOUSE;tr|D3Z7X7|D3Z7X7_MOUSE;sp|Q62393|TPD52_MOUSE;tr|F8WHQ1|F8WHQ1_MOUSE;tr|D3Z637|D3Z637_MOUSE	>tr|D3Z125|D3Z125_MOUSE Tumor protein D52 (Fragment) OS=Mus musculus OX=10090 GN=Tpd52 PE=1 SV=1;>tr|E9PUA7|E9PUA7_MOUSE Tumor protein D52 OS=Mus musculus OX=10090 GN=Tpd52 PE=1 SV=1;>tr|D3Z7X7|D3Z7X7_MOUSE Tumor protein D52 (Fragment) OS=Mus musculus OX=1	5	43	19.417	18.929	6	2	3	3	5	6	36002000	9680700	5913800	11797000	7504200	8380400
sp|Q62418|DBNL_MOUSE	sp|Q62418|DBNL_MOUSE	>sp|Q62418|DBNL_MOUSE Drebrin-like protein OS=Mus musculus OX=10090 GN=Dbnl PE=1 SV=2	16	40.8	48.699	277.95	31	33	27	39	45	42	44423000	68529000	52290000	74639000	72415000	64370000
sp|Q62419|SH3G1_MOUSE	sp|Q62419|SH3G1_MOUSE;tr|A0A3B2W7K0|A0A3B2W7K0_MOUSE	>sp|Q62419|SH3G1_MOUSE Endophilin-A2 OS=Mus musculus OX=10090 GN=Sh3gl1 PE=1 SV=1;>tr|A0A3B2W7K0|A0A3B2W7K0_MOUSE Endophilin-A2 OS=Mus musculus OX=10090 GN=Sh3gl1 PE=1 SV=1	8	28	41.518	23.149	3	4	2	6	4	6	6153700	4485300	6023700	5382800	3999100	3914900
sp|Q62422|OSTF1_MOUSE	sp|Q62422|OSTF1_MOUSE	>sp|Q62422|OSTF1_MOUSE Osteoclast-stimulating factor 1 OS=Mus musculus OX=10090 GN=Ostf1 PE=1 SV=2	6	35.8	23.782	27.274	6	4	8	7	7	10	13485000	17011000	19112000	27727000	14584000	26556000
tr|A0A0N4SVQ1|A0A0N4SVQ1_MOUSE	tr|A0A0N4SVQ1|A0A0N4SVQ1_MOUSE;sp|Q62425|NDUA4_MOUSE	>tr|A0A0N4SVQ1|A0A0N4SVQ1_MOUSE Cytochrome c oxidase subunit NDUFA4 OS=Mus musculus OX=10090 GN=Ndufa4 PE=1 SV=1;>sp|Q62425|NDUA4_MOUSE Cytochrome c oxidase subunit NDUFA4 OS=Mus musculus OX=10090 GN=Ndufa4 PE=1 SV=2	3	46.9	5.8765	13.655	2	2	2	2	0	2	22852000	20864000	19221000	18353000	17151000	10868000
sp|Q62426|CYTB_MOUSE	sp|Q62426|CYTB_MOUSE	>sp|Q62426|CYTB_MOUSE Cystatin-B OS=Mus musculus OX=10090 GN=Cstb PE=1 SV=1	7	75.5	11.045	42.919	9	12	9	12	11	14	38654000	50601000	45938000	75898000	91573000	59621000
tr|F7BUP2|F7BUP2_MOUSE	tr|F7BUP2|F7BUP2_MOUSE;tr|A2CG44|A2CG44_MOUSE;tr|E9Q5P9|E9Q5P9_MOUSE;sp|Q8BUN5|SMAD3_MOUSE;sp|Q9JIW5|SMAD9_MOUSE;tr|E9Q3M0|E9Q3M0_MOUSE;sp|Q62432|SMAD2_MOUSE	>tr|F7BUP2|F7BUP2_MOUSE Mothers against decapentaplegic homolog 3 (Fragment) OS=Mus musculus OX=10090 GN=Smad3 PE=4 SV=1;>tr|A2CG44|A2CG44_MOUSE Mothers against decapentaplegic homolog (Fragment) OS=Mus musculus OX=10090 GN=Smad3 PE=1 SV=1;>tr|E9Q5P9|E9Q5P	1	9.1	16.447	4.3481	1	0	2	0	1	0	1433400	1985100	1360000	3929100	2115500	2848900
sp|Q62433|NDRG1_MOUSE	sp|Q62433|NDRG1_MOUSE	>sp|Q62433|NDRG1_MOUSE Protein NDRG1 OS=Mus musculus OX=10090 GN=Ndrg1 PE=1 SV=1	3	11.7	43.008	9.2656	0	0	0	2	1	1	627890	793900	0	1163100	811180	1199500
sp|Q62446|FKBP3_MOUSE	sp|Q62446|FKBP3_MOUSE;tr|A0A1Y7VLK0|A0A1Y7VLK0_MOUSE;tr|A0A1Y7VP01|A0A1Y7VP01_MOUSE	>sp|Q62446|FKBP3_MOUSE Peptidyl-prolyl cis-trans isomerase FKBP3 OS=Mus musculus OX=10090 GN=Fkbp3 PE=1 SV=2;>tr|A0A1Y7VLK0|A0A1Y7VLK0_MOUSE Peptidylprolyl isomerase OS=Mus musculus OX=10090 GN=Fkbp3 PE=1 SV=1;>tr|A0A1Y7VP01|A0A1Y7VP01_MOUSE Peptidylprolyl	8	35.3	25.147	27.635	9	11	8	15	10	11	21450000	42120000	20634000	28068000	22698000	22983000
sp|Q62448|IF4G2_MOUSE	sp|Q62448|IF4G2_MOUSE	>sp|Q62448|IF4G2_MOUSE Eukaryotic translation initiation factor 4 gamma 2 OS=Mus musculus OX=10090 GN=Eif4g2 PE=1 SV=2	1	5.6	102.1	3.7482	1	0	0	0	1	0	109440	0	156010	170490	144810	150060
sp|Q62465|VAT1_MOUSE	sp|Q62465|VAT1_MOUSE	>sp|Q62465|VAT1_MOUSE Synaptic vesicle membrane protein VAT-1 homolog OS=Mus musculus OX=10090 GN=Vat1 PE=1 SV=3	3	10.8	43.096	9.1803	1	0	1	2	2	1	246490	257700	871320	706300	1473900	272940
sp|Q62481|VPS72_MOUSE	sp|Q62481|VPS72_MOUSE	>sp|Q62481|VPS72_MOUSE Vacuolar protein sorting-associated protein 72 homolog OS=Mus musculus OX=10090 GN=Vps72 PE=2 SV=2	2	10.3	40.783	8.0542	2	1	2	3	6	4	1386200	577060	1565300	1705300	1734800	1558100
tr|Q7TQE2|Q7TQE2_MOUSE	tr|Q7TQE2|Q7TQE2_MOUSE;sp|Q62523|ZYX_MOUSE	>tr|Q7TQE2|Q7TQE2_MOUSE Zyx protein OS=Mus musculus OX=10090 GN=Zyx PE=1 SV=1;>sp|Q62523|ZYX_MOUSE Zyxin OS=Mus musculus OX=10090 GN=Zyx PE=1 SV=2	7	19.7	57.026	95.922	3	6	3	7	8	6	14531000	14462000	19416000	24227000	24746000	24818000
sp|Q63829|COMD3_MOUSE	sp|Q63829|COMD3_MOUSE	>sp|Q63829|COMD3_MOUSE COMM domain-containing protein 3 OS=Mus musculus OX=10090 GN=Commd3 PE=1 SV=1	2	11.3	22.037	4.9285	0	2	0	3	0	0	912890	3606600	177430	3985700	2370100	2518000
tr|D3Z3G6|D3Z3G6_MOUSE	tr|D3Z3G6|D3Z3G6_MOUSE;sp|Q63844|MK03_MOUSE;tr|D3Z6D8|D3Z6D8_MOUSE;tr|A0A0U1RPX4|A0A0U1RPX4_MOUSE	>tr|D3Z3G6|D3Z3G6_MOUSE Mitogen-activated protein kinase OS=Mus musculus OX=10090 GN=Mapk3 PE=1 SV=1;>sp|Q63844|MK03_MOUSE Mitogen-activated protein kinase 3 OS=Mus musculus OX=10090 GN=Mapk3 PE=1 SV=5;>tr|D3Z6D8|D3Z6D8_MOUSE Mitogen-activated protein kina	3	14.2	42.401	5.8008	0	1	1	2	2	3	594880	369400	832780	1235100	909270	1359400
sp|Q63850|NUP62_MOUSE	sp|Q63850|NUP62_MOUSE	>sp|Q63850|NUP62_MOUSE Nuclear pore glycoprotein p62 OS=Mus musculus OX=10090 GN=Nup62 PE=1 SV=2	8	21.3	53.254	38.581	6	7	7	7	9	9	12058000	16774000	16173000	18094000	17015000	16905000
tr|A2AU62|A2AU62_MOUSE	tr|A2AU62|A2AU62_MOUSE;sp|Q64012|RALY_MOUSE;tr|A2AU61|A2AU61_MOUSE;tr|A2AU60|A2AU60_MOUSE	>tr|A2AU62|A2AU62_MOUSE RNA-binding protein Raly (Fragment) OS=Mus musculus OX=10090 GN=Raly PE=1 SV=1;>sp|Q64012|RALY_MOUSE RNA-binding protein Raly OS=Mus musculus OX=10090 GN=Raly PE=1 SV=3;>tr|A2AU61|A2AU61_MOUSE RNA-binding protein Raly (Fragment) OS=	7	30.2	31.69	39.261	12	8	10	6	9	10	11768000	11948000	8983300	14058000	9310000	8905700
tr|E9QMX7|E9QMX7_MOUSE	tr|E9QMX7|E9QMX7_MOUSE;sp|Q640N3|RHG30_MOUSE	>tr|E9QMX7|E9QMX7_MOUSE Rho GTPase-activating protein 30 OS=Mus musculus OX=10090 GN=Arhgap30 PE=1 SV=1;>sp|Q640N3|RHG30_MOUSE Rho GTPase-activating protein 30 OS=Mus musculus OX=10090 GN=Arhgap30 PE=1 SV=3	4	4.1	119.44	14.039	2	2	2	4	2	4	380900	185900	198400	783870	427080	357060
tr|H3BL68|H3BL68_MOUSE	tr|H3BL68|H3BL68_MOUSE;sp|Q640Q5|PAN3_MOUSE;tr|H3BKF3|H3BKF3_MOUSE	>tr|H3BL68|H3BL68_MOUSE PAN2-PAN3 deadenylation complex subunit Pan3 (Fragment) OS=Mus musculus OX=10090 GN=Pan3 PE=1 SV=1;>sp|Q640Q5|PAN3_MOUSE PAN2-PAN3 deadenylation complex subunit Pan3 OS=Mus musculus OX=10090 GN=Pan3 PE=1 SV=3;>tr|H3BKF3|H3BKF3_MOUSE	1	10.9	18.943	3.8184	1	0	0	0	0	0	0	0	0	0	0	0
sp|Q64131|RUNX3_MOUSE	sp|Q64131|RUNX3_MOUSE;tr|Q3U1Q3|Q3U1Q3_MOUSE	>sp|Q64131|RUNX3_MOUSE Runt-related transcription factor 3 OS=Mus musculus OX=10090 GN=Runx3 PE=1 SV=3;>tr|Q3U1Q3|Q3U1Q3_MOUSE Runt-related transcription factor OS=Mus musculus OX=10090 GN=Runx3 PE=1 SV=1	1	3.7	43.517	3.1237	0	1	2	0	1	1	243250	454940	556760	666560	0	792640
sp|Q64152|BTF3_MOUSE	sp|Q64152|BTF3_MOUSE	>sp|Q64152|BTF3_MOUSE Transcription factor BTF3 OS=Mus musculus OX=10090 GN=Btf3 PE=1 SV=3	2	23.5	22.031	11.672	1	2	5	3	5	1	4940200	7349900	11673000	16398000	9239200	5465900
tr|B7ZNK6|B7ZNK6_MOUSE	tr|B7ZNK6|B7ZNK6_MOUSE;sp|Q64191|ASPG_MOUSE	>tr|B7ZNK6|B7ZNK6_MOUSE Aga protein OS=Mus musculus OX=10090 GN=Aga PE=1 SV=1;>sp|Q64191|ASPG_MOUSE N(4)-(beta-N-acetylglucosaminyl)-L-asparaginase OS=Mus musculus OX=10090 GN=Aga PE=1 SV=1	1	3.6	35.925	3.2404	0	1	0	1	2	2	407350	671730	0	824570	536420	1110500
tr|E9Q4Q2|E9Q4Q2_MOUSE	tr|E9Q4Q2|E9Q4Q2_MOUSE;tr|D3YZC9|D3YZC9_MOUSE;tr|D3YZD0|D3YZD0_MOUSE;sp|Q64213|SF01_MOUSE;tr|D3YVH4|D3YVH4_MOUSE	>tr|E9Q4Q2|E9Q4Q2_MOUSE Splicing factor 1 OS=Mus musculus OX=10090 GN=Sf1 PE=1 SV=1;>tr|D3YZC9|D3YZC9_MOUSE Splicing factor 1 OS=Mus musculus OX=10090 GN=Sf1 PE=1 SV=1;>tr|D3YZD0|D3YZD0_MOUSE Splicing factor 1 OS=Mus musculus OX=10090 GN=Sf1 PE=1 SV=1;>sp|	10	22.1	59.698	122.58	15	17	19	21	20	23	26973000	33761000	34579000	43861000	36104000	42478000
sp|Q64282|IFIT1_MOUSE	sp|Q64282|IFIT1_MOUSE	>sp|Q64282|IFIT1_MOUSE Interferon-induced protein with tetratricopeptide repeats 1 OS=Mus musculus OX=10090 GN=Ifit1 PE=1 SV=2	8	22.5	53.737	26.216	7	5	6	0	0	0	1343600	1969600	1738900	641850	181170	218670
sp|Q64311|NTAN1_MOUSE	sp|Q64311|NTAN1_MOUSE;tr|D3YZ99|D3YZ99_MOUSE	>sp|Q64311|NTAN1_MOUSE Protein N-terminal asparagine amidohydrolase OS=Mus musculus OX=10090 GN=Ntan1 PE=1 SV=3;>tr|D3YZ99|D3YZ99_MOUSE Protein N-terminal asparagine amidohydrolase OS=Mus musculus OX=10090 GN=Ntan1 PE=1 SV=2	3	12.9	34.595	10.839	3	5	2	3	4	3	1661100	2364000	1909900	2179800	2104200	2125600
sp|Q64324|STXB2_MOUSE	sp|Q64324|STXB2_MOUSE;tr|F8WGM5|F8WGM5_MOUSE	>sp|Q64324|STXB2_MOUSE Syntaxin-binding protein 2 OS=Mus musculus OX=10090 GN=Stxbp2 PE=1 SV=1;>tr|F8WGM5|F8WGM5_MOUSE Syntaxin-binding protein 2 (Fragment) OS=Mus musculus OX=10090 GN=Stxbp2 PE=1 SV=1	3	8.1	66.357	10.801	1	2	1	2	2	1	143000	446870	368940	93738	559230	592410
tr|A0A3B2WB12|A0A3B2WB12_MOUSE	tr|A0A3B2WB12|A0A3B2WB12_MOUSE;sp|Q64327|MEA1_MOUSE;tr|A0A3B2WCH7|A0A3B2WCH7_MOUSE;tr|A0A3B2WD56|A0A3B2WD56_MOUSE	>tr|A0A3B2WB12|A0A3B2WB12_MOUSE Male-enhanced antigen 1 (Fragment) OS=Mus musculus OX=10090 GN=Mea1 PE=1 SV=1;>sp|Q64327|MEA1_MOUSE Male-enhanced antigen 1 OS=Mus musculus OX=10090 GN=Mea1 PE=1 SV=1;>tr|A0A3B2WCH7|A0A3B2WCH7_MOUSE Male-enhanced antigen 1 (	2	17.9	18.456	7.5592	2	1	1	4	2	3	2567400	3197800	3681800	5249300	7314600	3334600
sp|Q64339|ISG15_MOUSE	sp|Q64339|ISG15_MOUSE	>sp|Q64339|ISG15_MOUSE Ubiquitin-like protein ISG15 OS=Mus musculus OX=10090 GN=Isg15 PE=1 SV=4	1	5.6	17.897	2.9844	1	1	1	1	0	0	7457000	13044000	7206500	5490800	5337400	5141200
tr|E9PV48|E9PV48_MOUSE	tr|E9PV48|E9PV48_MOUSE;sp|Q64345|IFIT3_MOUSE	>tr|E9PV48|E9PV48_MOUSE Interferon-induced protein with tetratricopeptide repeats 3B OS=Mus musculus OX=10090 GN=Ifit3b PE=1 SV=1;>sp|Q64345|IFIT3_MOUSE Interferon-induced protein with tetratricopeptide repeats 3 OS=Mus musculus OX=10090 GN=Ifit3 PE=1 SV=1	3	10.2	47.219	8.8588	2	4	4	0	0	0	778050	1071900	833520	157170	84658	0
sp|Q64378|FKBP5_MOUSE	sp|Q64378|FKBP5_MOUSE	>sp|Q64378|FKBP5_MOUSE Peptidyl-prolyl cis-trans isomerase FKBP5 OS=Mus musculus OX=10090 GN=Fkbp5 PE=1 SV=1	9	23.7	50.966	31.259	10	10	8	7	5	5	6924400	9223000	6576500	7612200	5961300	6973300
sp|Q64433|CH10_MOUSE	sp|Q64433|CH10_MOUSE;tr|Q9JI95|Q9JI95_MOUSE	>sp|Q64433|CH10_MOUSE 10 kDa heat shock protein, mitochondrial OS=Mus musculus OX=10090 GN=Hspe1 PE=1 SV=2;>tr|Q9JI95|Q9JI95_MOUSE CPN10-like protein OS=Mus musculus OX=10090 GN=Cpn10-rs1 PE=3 SV=1	9	66.7	10.963	82.158	31	26	27	33	37	38	261890000	383380000	265330000	602330000	477150000	479310000
sp|Q64511|TOP2B_MOUSE	sp|Q64511|TOP2B_MOUSE	>sp|Q64511|TOP2B_MOUSE DNA topoisomerase 2-beta OS=Mus musculus OX=10090 GN=Top2b PE=1 SV=2	9	6.2	181.91	20.892	4	6	5	1	3	1	270020	605640	348410	273990	652500	492930
sp|Q64514|TPP2_MOUSE	sp|Q64514|TPP2_MOUSE;tr|A0A087WRC0|A0A087WRC0_MOUSE	>sp|Q64514|TPP2_MOUSE Tripeptidyl-peptidase 2 OS=Mus musculus OX=10090 GN=Tpp2 PE=1 SV=3;>tr|A0A087WRC0|A0A087WRC0_MOUSE Tripeptidyl-peptidase 2 OS=Mus musculus OX=10090 GN=Tpp2 PE=1 SV=1	17	18.4	139.88	52.729	13	11	7	13	10	13	2472700	2608400	2522100	3880800	2756700	4263500
sp|Q64520|KGUA_MOUSE	sp|Q64520|KGUA_MOUSE;tr|G3UYV3|G3UYV3_MOUSE;tr|E9Q7K1|E9Q7K1_MOUSE;tr|Q564G0|Q564G0_MOUSE	>sp|Q64520|KGUA_MOUSE Guanylate kinase OS=Mus musculus OX=10090 GN=Guk1 PE=1 SV=2;>tr|G3UYV3|G3UYV3_MOUSE Guanylate kinase (Fragment) OS=Mus musculus OX=10090 GN=Guk1 PE=1 SV=1;>tr|E9Q7K1|E9Q7K1_MOUSE Guanylate kinase OS=Mus musculus OX=10090 GN=Guk1 PE=1	2	19.2	21.918	6.5099	1	1	2	2	1	0	3894400	5572000	5874400	5167300	6268300	5361400
sp|Q64521|GPDM_MOUSE	sp|Q64521|GPDM_MOUSE;tr|A2AQR0|A2AQR0_MOUSE	>sp|Q64521|GPDM_MOUSE Glycerol-3-phosphate dehydrogenase, mitochondrial OS=Mus musculus OX=10090 GN=Gpd2 PE=1 SV=2;>tr|A2AQR0|A2AQR0_MOUSE Glycerol-3-phosphate dehydrogenase OS=Mus musculus OX=10090 GN=Gpd2 PE=1 SV=1	6	9.8	80.953	14.137	4	4	2	4	4	4	735370	1287700	657480	1288400	1284100	942380
sp|Q64523|H2A2C_MOUSE	sp|Q64523|H2A2C_MOUSE;sp|Q6GSS7|H2A2A_MOUSE	>sp|Q64523|H2A2C_MOUSE Histone H2A type 2-C OS=Mus musculus OX=10090 GN=Hist2h2ac PE=1 SV=3;>sp|Q6GSS7|H2A2A_MOUSE Histone H2A type 2-A OS=Mus musculus OX=10090 GN=Hist2h2aa1 PE=1 SV=3	2	35.7	13.988	142.26	39	42	42	30	27	33	2214800000	3081100000	2699200000	2492600000	1430900000	1335300000
sp|Q64674|SPEE_MOUSE	sp|Q64674|SPEE_MOUSE	>sp|Q64674|SPEE_MOUSE Spermidine synthase OS=Mus musculus OX=10090 GN=Srm PE=1 SV=1	7	28.5	33.995	28.02	8	8	7	8	7	9	10711000	9057600	7738900	9735100	9114700	9931100
tr|E9PXC2|E9PXC2_MOUSE	tr|E9PXC2|E9PXC2_MOUSE;tr|F6PWU6|F6PWU6_MOUSE;tr|F8WI12|F8WI12_MOUSE;sp|Q64705|USF2_MOUSE	>tr|E9PXC2|E9PXC2_MOUSE Upstream stimulatory factor 2 OS=Mus musculus OX=10090 GN=Usf2 PE=1 SV=1;>tr|F6PWU6|F6PWU6_MOUSE Upstream stimulatory factor 2 (Fragment) OS=Mus musculus OX=10090 GN=Usf2 PE=1 SV=1;>tr|F8WI12|F8WI12_MOUSE Upstream stimulatory factor	4	20	24.013	10.756	1	2	2	2	1	5	1159300	1101100	2302000	4456800	0	3281200
sp|Q64727|VINC_MOUSE	sp|Q64727|VINC_MOUSE	>sp|Q64727|VINC_MOUSE Vinculin OS=Mus musculus OX=10090 GN=Vcl PE=1 SV=4	4	5.3	116.72	8.6163	1	0	1	0	1	0	321420	402210	422840	291510	368690	73987
sp|Q64737|PUR2_MOUSE	sp|Q64737|PUR2_MOUSE	>sp|Q64737|PUR2_MOUSE Trifunctional purine biosynthetic protein adenosine-3 OS=Mus musculus OX=10090 GN=Gart PE=1 SV=3	8	9.9	107.5	27.876	4	1	2	6	5	9	1442200	1230300	1501900	1576200	1657100	1902400
tr|B7ZP47|B7ZP47_MOUSE	tr|B7ZP47|B7ZP47_MOUSE;sp|Q65Z40|WAPL_MOUSE	>tr|B7ZP47|B7ZP47_MOUSE Wapal protein OS=Mus musculus OX=10090 GN=Wapl PE=1 SV=1;>sp|Q65Z40|WAPL_MOUSE Wings apart-like protein homolog OS=Mus musculus OX=10090 GN=Wapl PE=1 SV=2	1	1.5	133.35	4.1545	1	1	0	1	1	2	97423	147670	21951	157080	148300	185490
sp|Q66JX5|FR1OP_MOUSE	sp|Q66JX5|FR1OP_MOUSE;tr|F6UTB8|F6UTB8_MOUSE	>sp|Q66JX5|FR1OP_MOUSE FGFR1 oncogene partner OS=Mus musculus OX=10090 GN=Fgfr1op PE=1 SV=1;>tr|F6UTB8|F6UTB8_MOUSE FGFR1 oncogene partner (Fragment) OS=Mus musculus OX=10090 GN=Fgfr1op PE=1 SV=1	4	18.3	42.758	22.081	1	2	3	3	4	5	1204700	2013200	1705000	764620	2140200	2218200
sp|Q67FY2|BCL9L_MOUSE	sp|Q67FY2|BCL9L_MOUSE	>sp|Q67FY2|BCL9L_MOUSE B-cell CLL/lymphoma 9-like protein OS=Mus musculus OX=10090 GN=Bcl9l PE=1 SV=1	2	2.1	156.68	4.8072	0	2	1	2	1	2	118170	247760	162850	451170	385510	302740
sp|Q68FD5|CLH1_MOUSE	sp|Q68FD5|CLH1_MOUSE;tr|Q5SXR6|Q5SXR6_MOUSE	>sp|Q68FD5|CLH1_MOUSE Clathrin heavy chain 1 OS=Mus musculus OX=10090 GN=Cltc PE=1 SV=3;>tr|Q5SXR6|Q5SXR6_MOUSE Clathrin heavy chain OS=Mus musculus OX=10090 GN=Cltc PE=1 SV=1	39	28.1	191.55	256.23	32	42	43	52	52	54	8573600	10761000	9348500	13113000	10444000	12178000
tr|Q5F258|Q5F258_MOUSE	tr|Q5F258|Q5F258_MOUSE;sp|Q68FF6|GIT1_MOUSE	>tr|Q5F258|Q5F258_MOUSE ARF GTPase-activating protein GIT1 OS=Mus musculus OX=10090 GN=Git1 PE=1 SV=1;>sp|Q68FF6|GIT1_MOUSE ARF GTPase-activating protein GIT1 OS=Mus musculus OX=10090 GN=Git1 PE=1 SV=1	2	3.9	84.194	5.2532	1	2	2	2	3	1	187200	502650	394700	465180	410180	305630
tr|Q8BUU7|Q8BUU7_MOUSE	tr|Q8BUU7|Q8BUU7_MOUSE;sp|Q68FH4|GALK2_MOUSE	>tr|Q8BUU7|Q8BUU7_MOUSE N-acetylgalactosamine kinase OS=Mus musculus OX=10090 GN=Galk2 PE=1 SV=1;>sp|Q68FH4|GALK2_MOUSE N-acetylgalactosamine kinase OS=Mus musculus OX=10090 GN=Galk2 PE=1 SV=1	4	13.9	49.315	15.497	3	6	5	5	4	6	1589800	3097200	3128700	4162000	2788100	5498900
tr|F8WGT1|F8WGT1_MOUSE	tr|F8WGT1|F8WGT1_MOUSE;sp|Q68FL4|SAHH3_MOUSE;tr|F8WI65|F8WI65_MOUSE;tr|H3BKT5|H3BKT5_MOUSE	>tr|F8WGT1|F8WGT1_MOUSE Adenosylhomocysteinase OS=Mus musculus OX=10090 GN=Ahcyl2 PE=1 SV=1;>sp|Q68FL4|SAHH3_MOUSE Putative adenosylhomocysteinase 3 OS=Mus musculus OX=10090 GN=Ahcyl2 PE=1 SV=1;>tr|F8WI65|F8WI65_MOUSE Adenosylhomocysteinase OS=Mus musculus	6	19.4	66.771	43.143	13	15	11	11	13	10	8811300	11386000	9756200	12504000	12692000	13690000
sp|Q68FL6|SYMC_MOUSE	sp|Q68FL6|SYMC_MOUSE;tr|E9QB02|E9QB02_MOUSE	>sp|Q68FL6|SYMC_MOUSE Methionine--tRNA ligase, cytoplasmic OS=Mus musculus OX=10090 GN=Mars PE=1 SV=1;>tr|E9QB02|E9QB02_MOUSE Methionine--tRNA ligase, cytoplasmic OS=Mus musculus OX=10090 GN=Mars PE=1 SV=1	5	6.8	101.43	13.426	3	2	3	4	1	4	397770	650360	558160	439210	578640	543600
sp|Q69ZC8|GPAM1_MOUSE	sp|Q69ZC8|GPAM1_MOUSE	>sp|Q69ZC8|GPAM1_MOUSE GPALPP motifs-containing protein 1 OS=Mus musculus OX=10090 GN=Gpalpp1 PE=1 SV=2	1	3.8	38.954	4.5442	0	0	1	1	1	1	139040	913370	946830	1410300	1825700	1431100
sp|Q69ZQ2|ISY1_MOUSE	sp|Q69ZQ2|ISY1_MOUSE;tr|A0A0N4SUM8|A0A0N4SUM8_MOUSE	>sp|Q69ZQ2|ISY1_MOUSE Pre-mRNA-splicing factor ISY1 homolog OS=Mus musculus OX=10090 GN=Isy1 PE=1 SV=2;>tr|A0A0N4SUM8|A0A0N4SUM8_MOUSE Predicted gene 45140 OS=Mus musculus OX=10090 GN=Gm45140 PE=4 SV=1	6	22.5	32.989	34.301	6	2	3	3	5	3	4884200	3872900	4159200	3337600	6983900	6267600
sp|Q6A028|SWP70_MOUSE	sp|Q6A028|SWP70_MOUSE	>sp|Q6A028|SWP70_MOUSE Switch-associated protein 70 OS=Mus musculus OX=10090 GN=Swap70 PE=1 SV=2	3	6.3	68.995	10.418	1	1	1	2	1	1	542950	437160	777150	660790	580120	479170
sp|Q6A068|CDC5L_MOUSE	sp|Q6A068|CDC5L_MOUSE;tr|A0A1W2P7Z8|A0A1W2P7Z8_MOUSE;tr|A0A1W2P7H4|A0A1W2P7H4_MOUSE;tr|A0A1W2P855|A0A1W2P855_MOUSE;tr|A0A1W2P6Q8|A0A1W2P6Q8_MOUSE;tr|A0A1W2P7S8|A0A1W2P7S8_MOUSE	>sp|Q6A068|CDC5L_MOUSE Cell division cycle 5-like protein OS=Mus musculus OX=10090 GN=Cdc5l PE=1 SV=2;>tr|A0A1W2P7Z8|A0A1W2P7Z8_MOUSE Predicted gene 9045 OS=Mus musculus OX=10090 GN=Gm9045 PE=4 SV=1;>tr|A0A1W2P7H4|A0A1W2P7H4_MOUSE Predicted gene 9048 OS=Mu	10	18	92.188	25.518	5	8	7	3	3	2	1093400	1666900	1571500	436290	974970	1152700
tr|F8VPX1|F8VPX1_MOUSE	tr|F8VPX1|F8VPX1_MOUSE;sp|Q6A4J8|UBP7_MOUSE;tr|E9PXY8|E9PXY8_MOUSE	>tr|F8VPX1|F8VPX1_MOUSE Ubiquitin carboxyl-terminal hydrolase 7 OS=Mus musculus OX=10090 GN=Usp7 PE=1 SV=1;>sp|Q6A4J8|UBP7_MOUSE Ubiquitin carboxyl-terminal hydrolase 7 OS=Mus musculus OX=10090 GN=Usp7 PE=1 SV=1;>tr|E9PXY8|E9PXY8_MOUSE Ubiquitin carboxyl-t	13	13.5	128.47	40.493	3	5	9	5	6	8	939130	1208900	1691800	2849100	1578500	1697700
tr|A0A0A0MQ76|A0A0A0MQ76_MOUSE	tr|A0A0A0MQ76|A0A0A0MQ76_MOUSE;sp|Q6DFW4|NOP58_MOUSE;tr|A0A087WP00|A0A087WP00_MOUSE;tr|A0A087WQ46|A0A087WQ46_MOUSE	>tr|A0A0A0MQ76|A0A0A0MQ76_MOUSE Nucleolar protein 58 OS=Mus musculus OX=10090 GN=Nop58 PE=1 SV=1;>sp|Q6DFW4|NOP58_MOUSE Nucleolar protein 58 OS=Mus musculus OX=10090 GN=Nop58 PE=1 SV=1;>tr|A0A087WP00|A0A087WP00_MOUSE Nucleolar protein 58 (Fragment) OS=Mus	4	13.3	50.063	26.438	5	4	3	1	4	4	2706700	1677600	1770200	3630400	1659700	2518000
sp|Q6GQT9|NOMO1_MOUSE	sp|Q6GQT9|NOMO1_MOUSE	>sp|Q6GQT9|NOMO1_MOUSE Nodal modulator 1 OS=Mus musculus OX=10090 GN=Nomo1 PE=1 SV=1	1	1.2	133.42	2.838	0	0	2	1	3	1	58372	0	54320	0	64453	68964
sp|Q6IRU2|TPM4_MOUSE	sp|Q6IRU2|TPM4_MOUSE	>sp|Q6IRU2|TPM4_MOUSE Tropomyosin alpha-4 chain OS=Mus musculus OX=10090 GN=Tpm4 PE=1 SV=3	14	48	28.467	186.5	19	26	26	23	28	25	58957000	72032000	53608000	68343000	89926000	82878000
sp|Q6IRU5|CLCB_MOUSE	sp|Q6IRU5|CLCB_MOUSE	>sp|Q6IRU5|CLCB_MOUSE Clathrin light chain B OS=Mus musculus OX=10090 GN=Cltb PE=1 SV=1	5	20.5	25.171	11.673	6	1	1	3	5	4	3077200	2500300	2566300	2659000	13999000	6145900
sp|Q6NSQ7|LTV1_MOUSE	sp|Q6NSQ7|LTV1_MOUSE	>sp|Q6NSQ7|LTV1_MOUSE Protein LTV1 homolog OS=Mus musculus OX=10090 GN=Ltv1 PE=1 SV=2	2	5.3	54.022	3.7414	0	0	0	0	2	0	129740	0	118860	66236	202240	0
sp|Q6NSR8|PEPL1_MOUSE	sp|Q6NSR8|PEPL1_MOUSE;tr|F6T2H5|F6T2H5_MOUSE	>sp|Q6NSR8|PEPL1_MOUSE Probable aminopeptidase NPEPL1 OS=Mus musculus OX=10090 GN=Npepl1 PE=1 SV=1;>tr|F6T2H5|F6T2H5_MOUSE Probable aminopeptidase NPEPL1 (Fragment) OS=Mus musculus OX=10090 GN=Npepl1 PE=1 SV=1	5	11.8	55.939	17.996	4	4	5	3	3	3	1461800	5173300	2291500	3128600	3986100	3228700
sp|Q6NV83|SR140_MOUSE	sp|Q6NV83|SR140_MOUSE	>sp|Q6NV83|SR140_MOUSE U2 snRNP-associated SURP motif-containing protein OS=Mus musculus OX=10090 GN=U2surp PE=1 SV=3	2	2.9	118.26	4.0418	1	0	0	0	1	0	70327	95905	0	125340	99666	80892
sp|Q6NVE8|WDR44_MOUSE	sp|Q6NVE8|WDR44_MOUSE	>sp|Q6NVE8|WDR44_MOUSE WD repeat-containing protein 44 OS=Mus musculus OX=10090 GN=Wdr44 PE=1 SV=1	4	6.6	101.55	6.3489	0	0	0	1	0	1	84103	61143	277150	296560	327770	343100
sp|Q6NVE9|PPTC7_MOUSE	sp|Q6NVE9|PPTC7_MOUSE	>sp|Q6NVE9|PPTC7_MOUSE Protein phosphatase PTC7 homolog OS=Mus musculus OX=10090 GN=Pptc7 PE=1 SV=1	1	4.8	33.048	4.0065	0	3	1	3	3	0	0	600580	317780	479900	687510	355470
sp|Q6NVF9|CPSF6_MOUSE	sp|Q6NVF9|CPSF6_MOUSE;tr|H3BJ30|H3BJ30_MOUSE;tr|H3BJW3|H3BJW3_MOUSE	>sp|Q6NVF9|CPSF6_MOUSE Cleavage and polyadenylation specificity factor subunit 6 OS=Mus musculus OX=10090 GN=Cpsf6 PE=1 SV=1;>tr|H3BJ30|H3BJ30_MOUSE Cleavage and polyadenylation-specificity factor subunit 6 OS=Mus musculus OX=10090 GN=Cpsf6 PE=1 SV=1;>tr|H	10	19.1	59.152	151.13	14	11	10	11	13	13	20512000	12017000	12123000	18231000	17867000	20364000
tr|A0A0G2JFW6|A0A0G2JFW6_MOUSE	tr|A0A0G2JFW6|A0A0G2JFW6_MOUSE;sp|Q6NXI6|RPRD2_MOUSE	>tr|A0A0G2JFW6|A0A0G2JFW6_MOUSE Regulation of nuclear pre-mRNA domain-containing protein 2 (Fragment) OS=Mus musculus OX=10090 GN=Rprd2 PE=1 SV=1;>sp|Q6NXI6|RPRD2_MOUSE Regulation of nuclear pre-mRNA domain-containing protein 2 OS=Mus musculus OX=10090 GN=	6	7.1	147.62	17.994	2	2	3	3	3	4	722430	915940	1356800	1257000	1195900	1851200
tr|A2AA85|A2AA85_MOUSE	tr|A2AA85|A2AA85_MOUSE;sp|Q6NXN1|SZRD1_MOUSE	>tr|A2AA85|A2AA85_MOUSE SUZ domain-containing protein 1 (Fragment) OS=Mus musculus OX=10090 GN=Szrd1 PE=1 SV=1;>sp|Q6NXN1|SZRD1_MOUSE SUZ domain-containing protein 1 OS=Mus musculus OX=10090 GN=Szrd1 PE=1 SV=1	3	40.4	16.277	19.535	0	0	2	2	4	4	2967100	3844300	3207100	3707200	3745100	10303000
sp|Q6NZB0|DNJC8_MOUSE	sp|Q6NZB0|DNJC8_MOUSE;tr|A2ALF0|A2ALF0_MOUSE;tr|A2ALF3|A2ALF3_MOUSE;tr|F6TQL3|F6TQL3_MOUSE	>sp|Q6NZB0|DNJC8_MOUSE DnaJ homolog subfamily C member 8 OS=Mus musculus OX=10090 GN=Dnajc8 PE=1 SV=2;>tr|A2ALF0|A2ALF0_MOUSE DnaJ homolog subfamily C member 8 OS=Mus musculus OX=10090 GN=Dnajc8 PE=1 SV=1;>tr|A2ALF3|A2ALF3_MOUSE DnaJ homolog subfamily C me	6	36.8	29.812	73.695	6	8	5	7	9	9	26130000	24495000	21988000	30520000	28834000	34317000
sp|Q6NZB1|ANM6_MOUSE	sp|Q6NZB1|ANM6_MOUSE	>sp|Q6NZB1|ANM6_MOUSE Protein arginine N-methyltransferase 6 OS=Mus musculus OX=10090 GN=Prmt6 PE=1 SV=2	1	3.7	41.866	2.9019	0	1	1	0	0	0	0	576360	826750	426640	508370	513810
sp|Q6NZF1|ZC11A_MOUSE	sp|Q6NZF1|ZC11A_MOUSE	>sp|Q6NZF1|ZC11A_MOUSE Zinc finger CCCH domain-containing protein 11A OS=Mus musculus OX=10090 GN=Zc3h11a PE=1 SV=1	2	3.5	86.491	5.0698	0	1	2	1	0	1	45518	710310	621680	397570	305690	937460
tr|A0A0J9YUS5|A0A0J9YUS5_MOUSE	tr|A0A0J9YUS5|A0A0J9YUS5_MOUSE;tr|E9PVC6|E9PVC6_MOUSE;tr|E9Q9E1|E9Q9E1_MOUSE;tr|E9PVC5|E9PVC5_MOUSE;sp|Q6NZJ6|IF4G1_MOUSE	>tr|A0A0J9YUS5|A0A0J9YUS5_MOUSE Eukaryotic translation initiation factor 4 gamma 1 OS=Mus musculus OX=10090 GN=Eif4g1 PE=1 SV=1;>tr|E9PVC6|E9PVC6_MOUSE Eukaryotic translation initiation factor 4 gamma 1 OS=Mus musculus OX=10090 GN=Eif4g1 PE=1 SV=1;>tr|E9Q9	5	6.7	145.31	22.86	5	5	2	4	4	2	1049500	1063200	900450	1193600	1475100	891360
tr|E9PUF4|E9PUF4_MOUSE	tr|E9PUF4|E9PUF4_MOUSE;tr|E9Q640|E9Q640_MOUSE;tr|E9PYZ7|E9PYZ7_MOUSE;sp|Q6NZN0|RBM26_MOUSE	>tr|E9PUF4|E9PUF4_MOUSE RNA-binding protein 26 OS=Mus musculus OX=10090 GN=Rbm26 PE=1 SV=1;>tr|E9Q640|E9Q640_MOUSE RNA-binding protein 26 OS=Mus musculus OX=10090 GN=Rbm26 PE=1 SV=1;>tr|E9PYZ7|E9PYZ7_MOUSE RNA-binding protein 26 OS=Mus musculus OX=10090 GN	2	3.8	111.01	3.6121	0	0	1	0	1	0	518170	0	78345	221790	294530	197340
sp|Q6P069|SORCN_MOUSE	sp|Q6P069|SORCN_MOUSE	>sp|Q6P069|SORCN_MOUSE Sorcin OS=Mus musculus OX=10090 GN=Sri PE=1 SV=1	9	44.4	21.627	32.595	14	12	12	10	12	12	106420000	98575000	87309000	97358000	103670000	114650000
sp|Q6P1B1|XPP1_MOUSE	sp|Q6P1B1|XPP1_MOUSE;tr|S4R1I3|S4R1I3_MOUSE;tr|Q3UE92|Q3UE92_MOUSE	>sp|Q6P1B1|XPP1_MOUSE Xaa-Pro aminopeptidase 1 OS=Mus musculus OX=10090 GN=Xpnpep1 PE=1 SV=1;>tr|S4R1I3|S4R1I3_MOUSE Xaa-Pro aminopeptidase 1 OS=Mus musculus OX=10090 GN=Xpnpep1 PE=1 SV=1;>tr|Q3UE92|Q3UE92_MOUSE X-prolyl aminopeptidase (Aminopeptidase P) 1	4	9.3	69.59	8.2631	0	2	2	0	1	1	755550	1570400	1155500	1255200	1049500	1100000
sp|Q6P1F6|2ABA_MOUSE	sp|Q6P1F6|2ABA_MOUSE;tr|Q9CWU3|Q9CWU3_MOUSE	>sp|Q6P1F6|2ABA_MOUSE Serine/threonine-protein phosphatase 2A 55 kDa regulatory subunit B alpha isoform OS=Mus musculus OX=10090 GN=Ppp2r2a PE=1 SV=1;>tr|Q9CWU3|Q9CWU3_MOUSE Serine/threonine-protein phosphatase 2A 55 kDa regulatory subunit B OS=Mus musculu	6	15.4	51.691	27.578	4	4	4	7	3	5	3892700	7792600	2941200	3825200	3420000	4800800
tr|E9Q2C4|E9Q2C4_MOUSE	tr|E9Q2C4|E9Q2C4_MOUSE;tr|F8WJC1|F8WJC1_MOUSE;tr|Q3URI3|Q3URI3_MOUSE;sp|Q6P1Y8|INP4B_MOUSE;tr|E9PVM1|E9PVM1_MOUSE;tr|E9PVM3|E9PVM3_MOUSE	>tr|E9Q2C4|E9Q2C4_MOUSE Type II inositol 3,4-bisphosphate 4-phosphatase (Fragment) OS=Mus musculus OX=10090 GN=Inpp4b PE=1 SV=1;>tr|F8WJC1|F8WJC1_MOUSE Type II inositol 3,4-bisphosphate 4-phosphatase OS=Mus musculus OX=10090 GN=Inpp4b PE=1 SV=1;>tr|Q3URI3|	2	4.6	71.748	7.0067	0	0	0	0	0	2	0	78000	113720	0	0	290520
sp|Q6P2K6|P4R3A_MOUSE	sp|Q6P2K6|P4R3A_MOUSE;tr|E9Q481|E9Q481_MOUSE	>sp|Q6P2K6|P4R3A_MOUSE Serine/threonine-protein phosphatase 4 regulatory subunit 3A OS=Mus musculus OX=10090 GN=Ppp4r3a PE=1 SV=1;>tr|E9Q481|E9Q481_MOUSE Serine/threonine-protein phosphatase 4 regulatory subunit 3A OS=Mus musculus OX=10090 GN=Ppp4r3a PE=1	4	5.6	93.841	10.538	2	2	1	2	3	3	552620	476980	522660	799940	804100	719510
tr|A0A087WSB5|A0A087WSB5_MOUSE	tr|A0A087WSB5|A0A087WSB5_MOUSE;tr|A0A087WRE5|A0A087WRE5_MOUSE;sp|Q6P3D0|NUD16_MOUSE	>tr|A0A087WSB5|A0A087WSB5_MOUSE U8 snoRNA-decapping enzyme (Fragment) OS=Mus musculus OX=10090 GN=Nudt16 PE=1 SV=1;>tr|A0A087WRE5|A0A087WRE5_MOUSE U8 snoRNA-decapping enzyme (Fragment) OS=Mus musculus OX=10090 GN=Nudt16 PE=1 SV=1;>sp|Q6P3D0|NUD16_MOUSE U8	3	75.8	7.0642	7.0984	4	1	2	2	2	1	4109100	7112100	4445900	6498900	3079600	6619800
tr|D3Z7T4|D3Z7T4_MOUSE	tr|D3Z7T4|D3Z7T4_MOUSE;sp|Q6P3E7|HDA10_MOUSE	>tr|D3Z7T4|D3Z7T4_MOUSE Polyamine deacetylase HDAC10 OS=Mus musculus OX=10090 GN=Hdac10 PE=1 SV=1;>sp|Q6P3E7|HDA10_MOUSE Polyamine deacetylase HDAC10 OS=Mus musculus OX=10090 GN=Hdac10 PE=2 SV=2	1	3	51.234	8.6464	2	3	3	2	2	3	0	773550	582200	921270	850230	953710
sp|Q6P4T2|U520_MOUSE	sp|Q6P4T2|U520_MOUSE	>sp|Q6P4T2|U520_MOUSE U5 small nuclear ribonucleoprotein 200 kDa helicase OS=Mus musculus OX=10090 GN=Snrnp200 PE=1 SV=1	25	13.9	244.54	96.562	16	18	16	20	18	14	1581400	2225900	2011200	1937000	1488000	2230400
sp|Q6P542|ABCF1_MOUSE	sp|Q6P542|ABCF1_MOUSE	>sp|Q6P542|ABCF1_MOUSE ATP-binding cassette sub-family F member 1 OS=Mus musculus OX=10090 GN=Abcf1 PE=1 SV=1	2	3.5	94.944	6.9598	3	0	0	0	0	0	0	0	0	0	0	0
sp|Q6P5D8|SMHD1_MOUSE	sp|Q6P5D8|SMHD1_MOUSE	>sp|Q6P5D8|SMHD1_MOUSE Structural maintenance of chromosomes flexible hinge domain-containing protein 1 OS=Mus musculus OX=10090 GN=Smchd1 PE=1 SV=2	9	6.6	225.65	22.492	5	5	2	4	3	1	526970	303910	520390	212970	301270	358250
sp|Q6P5E4|UGGG1_MOUSE	sp|Q6P5E4|UGGG1_MOUSE	>sp|Q6P5E4|UGGG1_MOUSE UDP-glucose:glycoprotein glucosyltransferase 1 OS=Mus musculus OX=10090 GN=Uggt1 PE=1 SV=4	19	16.8	176.43	131.58	15	25	18	21	19	20	3547500	4152300	3111100	4789300	4374300	4801600
tr|A0A087WRC8|A0A087WRC8_MOUSE	tr|A0A087WRC8|A0A087WRC8_MOUSE;tr|A0A087WQF7|A0A087WQF7_MOUSE;sp|Q6P5F6|S39AA_MOUSE	>tr|A0A087WRC8|A0A087WRC8_MOUSE Zinc transporter ZIP10 (Fragment) OS=Mus musculus OX=10090 GN=Slc39a10 PE=1 SV=1;>tr|A0A087WQF7|A0A087WQF7_MOUSE Zinc transporter ZIP10 (Fragment) OS=Mus musculus OX=10090 GN=Slc39a10 PE=1 SV=1;>sp|Q6P5F6|S39AA_MOUSE Zinc tr	1	7.6	16.869	2.6481	1	1	0	0	1	2	7578100	9500400	8853700	10314000	8160600	11395000
sp|Q6P5F9|XPO1_MOUSE	sp|Q6P5F9|XPO1_MOUSE	>sp|Q6P5F9|XPO1_MOUSE Exportin-1 OS=Mus musculus OX=10090 GN=Xpo1 PE=1 SV=1	3	3.6	123.09	8.9941	1	2	0	4	4	6	240520	327120	378640	572440	536060	548270
sp|Q6P8I4|PCNP_MOUSE	sp|Q6P8I4|PCNP_MOUSE;tr|Q3TM89|Q3TM89_MOUSE;tr|F8WI88|F8WI88_MOUSE;tr|D3YWA4|D3YWA4_MOUSE	>sp|Q6P8I4|PCNP_MOUSE PEST proteolytic signal-containing nuclear protein OS=Mus musculus OX=10090 GN=Pcnp PE=1 SV=1;>tr|Q3TM89|Q3TM89_MOUSE PEST proteolytic signal-containing nuclear protein OS=Mus musculus OX=10090 GN=Pcnp PE=1 SV=1;>tr|F8WI88|F8WI88_MOUS	5	36	18.963	28.283	7	6	6	5	7	7	21373000	30094000	18874000	25442000	25106000	24696000
sp|Q6P8X1|SNX6_MOUSE	sp|Q6P8X1|SNX6_MOUSE;tr|A0A1W2P701|A0A1W2P701_MOUSE	>sp|Q6P8X1|SNX6_MOUSE Sorting nexin-6 OS=Mus musculus OX=10090 GN=Snx6 PE=1 SV=2;>tr|A0A1W2P701|A0A1W2P701_MOUSE Sorting nexin-6 OS=Mus musculus OX=10090 GN=Snx6 PE=1 SV=1	4	15	46.648	12.085	0	3	2	2	4	3	767620	844200	840570	1291300	1541400	1619400
sp|Q6P9Q6|FKB15_MOUSE	sp|Q6P9Q6|FKB15_MOUSE;tr|Q80YW9|Q80YW9_MOUSE;tr|Q80YW6|Q80YW6_MOUSE	>sp|Q6P9Q6|FKB15_MOUSE FK506-binding protein 15 OS=Mus musculus OX=10090 GN=Fkbp15 PE=1 SV=2;>tr|Q80YW9|Q80YW9_MOUSE Peptidylprolyl isomerase OS=Mus musculus OX=10090 GN=Fkbp15 PE=1 SV=1;>tr|Q80YW6|Q80YW6_MOUSE Peptidylprolyl isomerase OS=Mus musculus OX=1	9	13.5	132.96	24.99	2	4	3	7	3	3	515250	1190600	613260	1695100	772820	1177200
sp|Q6P9R2|OXSR1_MOUSE	sp|Q6P9R2|OXSR1_MOUSE	>sp|Q6P9R2|OXSR1_MOUSE Serine/threonine-protein kinase OSR1 OS=Mus musculus OX=10090 GN=Oxsr1 PE=1 SV=1	6	15.6	58.213	21.206	3	3	5	7	6	4	1361600	1808400	1311900	2515700	1804200	1631300
tr|D3YWI3|D3YWI3_MOUSE	tr|D3YWI3|D3YWI3_MOUSE;sp|Q6P9R4|ARHGI_MOUSE	>tr|D3YWI3|D3YWI3_MOUSE Rho guanine nucleotide exchange factor 18 (Fragment) OS=Mus musculus OX=10090 GN=Arhgef18 PE=1 SV=1;>sp|Q6P9R4|ARHGI_MOUSE Rho guanine nucleotide exchange factor 18 OS=Mus musculus OX=10090 GN=Arhgef18 PE=1 SV=3	1	14	11.638	3.287	1	1	2	0	1	0	3194900	0	0	1719600	3048600	0
sp|Q6PA06|ATLA2_MOUSE	sp|Q6PA06|ATLA2_MOUSE	>sp|Q6PA06|ATLA2_MOUSE Atlastin-2 OS=Mus musculus OX=10090 GN=Atl2 PE=1 SV=1	2	9.8	66.223	2.7714	0	1	0	0	0	1	78171	358120	736280	1336200	368230	1068200
sp|Q6PAM1|TXLNA_MOUSE	sp|Q6PAM1|TXLNA_MOUSE	>sp|Q6PAM1|TXLNA_MOUSE Alpha-taxilin OS=Mus musculus OX=10090 GN=Txlna PE=1 SV=1	4	9.9	62.368	11.643	3	3	4	1	3	6	1004800	917060	1190900	1452500	2002500	1298200
sp|Q6PB66|LPPRC_MOUSE	sp|Q6PB66|LPPRC_MOUSE	>sp|Q6PB66|LPPRC_MOUSE Leucine-rich PPR motif-containing protein, mitochondrial OS=Mus musculus OX=10090 GN=Lrpprc PE=1 SV=2	16	16	156.61	41.166	4	8	8	13	10	11	517820	1077000	693570	1178100	1380700	1343400
tr|E0CYI3|E0CYI3_MOUSE	tr|E0CYI3|E0CYI3_MOUSE;sp|Q6PCP5|MFF_MOUSE;tr|E0CYB9|E0CYB9_MOUSE;tr|F7B1A4|F7B1A4_MOUSE;tr|F6VAL0|F6VAL0_MOUSE;tr|F7CTF8|F7CTF8_MOUSE	>tr|E0CYI3|E0CYI3_MOUSE Mitochondrial fission factor OS=Mus musculus OX=10090 GN=Mff PE=1 SV=1;>sp|Q6PCP5|MFF_MOUSE Mitochondrial fission factor OS=Mus musculus OX=10090 GN=Mff PE=1 SV=1;>tr|E0CYB9|E0CYB9_MOUSE Mitochondrial fission factor OS=Mus musculus	2	17.3	28.003	4.8203	0	0	0	2	0	0	1723000	2153400	2268200	4427300	2661200	3222700
tr|Q3UID0|Q3UID0_MOUSE	tr|Q3UID0|Q3UID0_MOUSE;sp|Q6PDG5|SMRC2_MOUSE	>tr|Q3UID0|Q3UID0_MOUSE SWI/SNF complex subunit SMARCC2 OS=Mus musculus OX=10090 GN=Smarcc2 PE=1 SV=1;>sp|Q6PDG5|SMRC2_MOUSE SWI/SNF complex subunit SMARCC2 OS=Mus musculus OX=10090 GN=Smarcc2 PE=1 SV=2	11	17.4	124.68	102.73	13	15	19	20	17	22	5813900	6724400	7452100	10412000	7694400	10674000
tr|A0A1D5RMC1|A0A1D5RMC1_MOUSE	tr|A0A1D5RMC1|A0A1D5RMC1_MOUSE;sp|Q6PDL0|DC1L2_MOUSE	>tr|A0A1D5RMC1|A0A1D5RMC1_MOUSE Cytoplasmic dynein 1 light intermediate chain 2 (Fragment) OS=Mus musculus OX=10090 GN=Dync1li2 PE=1 SV=1;>sp|Q6PDL0|DC1L2_MOUSE Cytoplasmic dynein 1 light intermediate chain 2 OS=Mus musculus OX=10090 GN=Dync1li2 PE=1 SV=2	1	3	45.24	2.618	1	2	2	0	1	2	273960	412950	0	103880	0	0
sp|Q6PDM2|SRSF1_MOUSE	sp|Q6PDM2|SRSF1_MOUSE;tr|H7BX95|H7BX95_MOUSE	>sp|Q6PDM2|SRSF1_MOUSE Serine/arginine-rich splicing factor 1 OS=Mus musculus OX=10090 GN=Srsf1 PE=1 SV=3;>tr|H7BX95|H7BX95_MOUSE Serine/arginine-rich-splicing factor 1 OS=Mus musculus OX=10090 GN=Srsf1 PE=1 SV=1	13	45.6	27.744	229.11	40	45	37	51	58	55	125710000	185180000	161720000	211680000	178710000	246950000
sp|Q6PDY2|AEDO_MOUSE	sp|Q6PDY2|AEDO_MOUSE	>sp|Q6PDY2|AEDO_MOUSE 2-aminoethanethiol dioxygenase OS=Mus musculus OX=10090 GN=Ado PE=1 SV=2	2	10.2	28.372	6.0715	2	0	0	5	1	0	932740	0	705450	2104100	1164700	338560
[truncated: 1,494 more rows]
