# Supplementary material for: Glycolytic and lipid oxidative metabolic programs are essential for freshly-isolated regulatory T cells in mice with sepsis
Source: RSC Adv. 2020 Jun 3;10(35):21000–8. doi: 10.1039/d0ra01947j (PMC9054272; doi:10.1039/d0ra01947j)
Supplement: RA-010-D0RA01947J-s002 [file RA-010-D0RA01947J-s002.xlsx]

## Sheet: Sheet1
							MS/MS Count						iBAQ Intensity
T: Protein IDs	T: Majority protein IDs	T: Fasta headers	T: Unique peptides	T: Sequence coverage [%]	T: Mol. weight [kDa]	T: Score	T: MS/MS Count 24H-1	T: MS/MS Count 24H-2	T: MS/MS Count 24H-3	T: MS/MS Count sham-1	T: MS/MS Count sham-2	T: MS/MS Count sham-3	24H-1	24H-2	24H-3	sham-1	sham-2	sham-3	Student's T-test p-value sham_24H	Ratio(24H/sham)
sp|Q6ZWZ2|UB2R2_MOUSE	sp|Q6ZWZ2|UB2R2_MOUSE	>sp|Q6ZWZ2|UB2R2_MOUSE Ubiquitin-conjugating enzyme E2 R2 OS=Mus musculus OX=10090 GN=Ube2r2 PE=1 SV=1	1	5.5	27.166	2.904	0	0	0	1	0	0	NaN	149095	148094	846959	1020750	NaN	0.0120252	0.15912
sp|Q8BRF7|SCFD1_MOUSE	sp|Q8BRF7|SCFD1_MOUSE	>sp|Q8BRF7|SCFD1_MOUSE Sec1 family domain-containing protein 1 OS=Mus musculus OX=10090 GN=Scfd1 PE=1 SV=1	7	19.6	72.322	20.349	1	1	2	6	1	1	216898	770279	110748	2161190	1067120	1946370	0.0257025	0.212173
sp|Q9JJL8|SYSM_MOUSE	sp|Q9JJL8|SYSM_MOUSE	>sp|Q9JJL8|SYSM_MOUSE Serine--tRNA ligase, mitochondrial OS=Mus musculus OX=10090 GN=Sars2 PE=1 SV=2	3	8.7	58.316	6.3624	0	2	2	4	1	3	113822	170414	NaN	507706	617552	643723	0.00447537	0.241017
sp|Q9CR41|HYPK_MOUSE	sp|Q9CR41|HYPK_MOUSE	>sp|Q9CR41|HYPK_MOUSE Huntingtin-interacting protein K OS=Mus musculus OX=10090 GN=Hypk PE=1 SV=2	3	31.8	14.679	31.442	1	0	0	5	2	4	1286420	3697510	1029540	8628930	6080290	7287510	0.00904348	0.27338
sp|Q8K157|GALM_MOUSE	sp|Q8K157|GALM_MOUSE	>sp|Q8K157|GALM_MOUSE Aldose 1-epimerase OS=Mus musculus OX=10090 GN=Galm PE=1 SV=1	3	13.5	37.798	10.718	2	4	2	5	2	3	4791560	3619160	3929260	15101400	14121800	12816300	0.000189378	0.293533
tr|A0A0A6YW80|A0A0A6YW80_MOUSE	tr|A0A0A6YW80|A0A0A6YW80_MOUSE;tr|G3X8Y3|G3X8Y3_MOUSE;sp|Q80UM3|NAA15_MOUSE	>tr|A0A0A6YW80|A0A0A6YW80_MOUSE N-alpha-acetyltransferase 15, NatA auxiliary subunit OS=Mus musculus OX=10090 GN=Naa15 PE=1 SV=1;>tr|G3X8Y3|G3X8Y3_MOUSE N-alpha-acetyltransferase 15, NatA auxiliary subunit OS=Mus musculus OX=10090 GN=Naa15 PE=1 SV=1;>sp|Q8	2	3.2	95.295	3.6511	0	0	0	1	0	0	61455.9	197278	1289370	1552500	1938270	1665530	0.0412058	0.300235
tr|A0A0R4J1D9|A0A0R4J1D9_MOUSE	tr|A0A0R4J1D9|A0A0R4J1D9_MOUSE;tr|Q3TNB8|Q3TNB8_MOUSE;sp|O88842|FGD3_MOUSE	>tr|A0A0R4J1D9|A0A0R4J1D9_MOUSE FYVE, RhoGEF and PH domain-containing protein 3 OS=Mus musculus OX=10090 GN=Fgd3 PE=1 SV=1;>tr|Q3TNB8|Q3TNB8_MOUSE FYVE, RhoGEF and PH domain containing 3, isoform CRA_b OS=Mus musculus OX=10090 GN=Fgd3 PE=1 SV=1;>sp|O88842|	3	7.5	58.8	8.3284	1	2	2	1	5	2	247726	488737	361703	1091380	1624670	760761	0.0385334	0.315854
sp|Q91XV3|BASP1_MOUSE	sp|Q91XV3|BASP1_MOUSE	>sp|Q91XV3|BASP1_MOUSE Brain acid soluble protein 1 OS=Mus musculus OX=10090 GN=Basp1 PE=1 SV=3	3	33.6	22.086	10.783	0	0	2	3	2	1	2288930	3112590	3793720	9455360	8687440	10915700	0.00108251	0.316439
tr|E9PZ58|E9PZ58_MOUSE	tr|E9PZ58|E9PZ58_MOUSE;sp|P97355|SPSY_MOUSE	>tr|E9PZ58|E9PZ58_MOUSE Spermine synthase OS=Mus musculus OX=10090 GN=Sms PE=1 SV=1;>sp|P97355|SPSY_MOUSE Spermine synthase OS=Mus musculus OX=10090 GN=Sms PE=1 SV=1	4	20.2	28.655	6.2528	0	0	0	1	1	1	354567	560287	830210	1127910	1679960	2121110	0.0290775	0.354042
sp|P26011|ITB7_MOUSE	sp|P26011|ITB7_MOUSE	>sp|P26011|ITB7_MOUSE Integrin beta-7 OS=Mus musculus OX=10090 GN=Itgb7 PE=1 SV=2	3	5	87.411	7.3119	0	0	0	2	2	2	160221	267850	208430	481795	530731	691285	0.00725418	0.373575
tr|K3W4R2|K3W4R2_MOUSE	tr|K3W4R2|K3W4R2_MOUSE;sp|Q6URW6|MYH14_MOUSE	>tr|K3W4R2|K3W4R2_MOUSE Myosin-14 OS=Mus musculus OX=10090 GN=Myh14 PE=1 SV=1;>sp|Q6URW6|MYH14_MOUSE Myosin-14 OS=Mus musculus OX=10090 GN=Myh14 PE=1 SV=1	1	2.1	228.56	3.2059	0	0	2	1	1	2	82179.6	NaN	123184	221513	292998	303081	0.0187173	0.376772
sp|Q9CQJ8|NDUB9_MOUSE	sp|Q9CQJ8|NDUB9_MOUSE	>sp|Q9CQJ8|NDUB9_MOUSE NADH dehydrogenase [ubiquinone] 1 beta subcomplex subunit 9 OS=Mus musculus OX=10090 GN=Ndufb9 PE=1 SV=3	2	26.8	21.984	16.915	0	1	1	1	3	6	3166010	3406660	2071330	8363280	5181280	9264540	0.0223882	0.378972
sp|Q9D1M0|SEC13_MOUSE	sp|Q9D1M0|SEC13_MOUSE	>sp|Q9D1M0|SEC13_MOUSE Protein SEC13 homolog OS=Mus musculus OX=10090 GN=Sec13 PE=1 SV=3	3	18.6	35.565	58.895	1	0	2	2	2	5	1998150	2170320	8003490	10315100	8555050	12555000	0.0485697	0.387332
tr|A0A3Q4L2S8|A0A3Q4L2S8_MOUSE	tr|A0A3Q4L2S8|A0A3Q4L2S8_MOUSE;sp|Q9D7M8|RPB4_MOUSE	>tr|A0A3Q4L2S8|A0A3Q4L2S8_MOUSE DNA-directed RNA polymerase II subunit RPB4 OS=Mus musculus OX=10090 GN=Polr2d PE=4 SV=1;>sp|Q9D7M8|RPB4_MOUSE DNA-directed RNA polymerase II subunit RPB4 OS=Mus musculus OX=10090 GN=Polr2d PE=1 SV=2	2	30.9	12.777	11.568	1	2	1	4	4	5	4942040	6400980	5976600	11252300	11560600	19867800	0.0415093	0.405795
tr|V9GX42|V9GX42_MOUSE	tr|V9GX42|V9GX42_MOUSE;sp|Q2VPQ9|EAF6_MOUSE	>tr|V9GX42|V9GX42_MOUSE Chromatin modification-related protein MEAF6 OS=Mus musculus OX=10090 GN=Meaf6 PE=1 SV=1;>sp|Q2VPQ9|EAF6_MOUSE Chromatin modification-related protein MEAF6 OS=Mus musculus OX=10090 GN=Meaf6 PE=1 SV=1	3	24.9	20.518	8.2663	1	2	3	5	3	4	5944370	6252910	5335230	10911900	14749700	16637500	0.00840422	0.414489
sp|O09000|NCOA3_MOUSE	sp|O09000|NCOA3_MOUSE;tr|A2A468|A2A468_MOUSE;tr|Q05BA5|Q05BA5_MOUSE	>sp|O09000|NCOA3_MOUSE Nuclear receptor coactivator 3 OS=Mus musculus OX=10090 GN=Ncoa3 PE=1 SV=2;>tr|A2A468|A2A468_MOUSE Nuclear receptor coactivator OS=Mus musculus OX=10090 GN=Ncoa3 PE=1 SV=1;>tr|Q05BA5|Q05BA5_MOUSE Nuclear receptor coactivator OS=Mus m	7	8.2	151.57	21.152	6	3	4	3	2	5	469468	259601	527244	1134930	981279	883855	0.00601979	0.418762
sp|Q8C0E2|VP26B_MOUSE	sp|Q8C0E2|VP26B_MOUSE	>sp|Q8C0E2|VP26B_MOUSE Vacuolar protein sorting-associated protein 26B OS=Mus musculus OX=10090 GN=Vps26b PE=1 SV=1	4	16.1	39.124	19.03	1	2	3	2	5	2	778471	742885	1541900	2170600	2489990	2459150	0.00844062	0.430248
tr|G5E8V8|G5E8V8_MOUSE	tr|G5E8V8|G5E8V8_MOUSE;sp|Q9JJT9|PHAX_MOUSE;tr|F6RPD4|F6RPD4_MOUSE	>tr|G5E8V8|G5E8V8_MOUSE Phosphorylated adapter RNA export protein OS=Mus musculus OX=10090 GN=Phax PE=1 SV=1;>sp|Q9JJT9|PHAX_MOUSE Phosphorylated adapter RNA export protein OS=Mus musculus OX=10090 GN=Phax PE=1 SV=1;>tr|F6RPD4|F6RPD4_MOUSE Phosphorylated a	2	8.8	40.866	6.9232	0	0	1	2	2	0	437663	325882	381129	1153240	739506	667147	0.0381386	0.447157
sp|O35638|STAG2_MOUSE	sp|O35638|STAG2_MOUSE;tr|A2AFF6|A2AFF6_MOUSE	>sp|O35638|STAG2_MOUSE Cohesin subunit SA-2 OS=Mus musculus OX=10090 GN=Stag2 PE=1 SV=3;>tr|A2AFF6|A2AFF6_MOUSE Cohesin subunit SA-2 OS=Mus musculus OX=10090 GN=Stag2 PE=1 SV=1	5	6.8	141.28	18.869	1	0	1	5	3	4	164251	341932	285361	660898	580259	508014	0.00960417	0.452525
sp|E9QAT4|SC16A_MOUSE	sp|E9QAT4|SC16A_MOUSE	>sp|E9QAT4|SC16A_MOUSE Protein transport protein Sec16A OS=Mus musculus OX=10090 GN=Sec16a PE=1 SV=1	8	5.6	254.2	28.055	2	3	1	7	6	4	451204	590304	160600	896158	852469	893405	0.0196348	0.454994
sp|Q91V41|RAB14_MOUSE	sp|Q91V41|RAB14_MOUSE;tr|Q50HX3|Q50HX3_MOUSE	>sp|Q91V41|RAB14_MOUSE Ras-related protein Rab-14 OS=Mus musculus OX=10090 GN=Rab14 PE=1 SV=3;>tr|Q50HX3|Q50HX3_MOUSE RAB14 protein variant OS=Mus musculus OX=10090 GN=Rab14 PE=1 SV=1	3	18.6	23.897	7.3305	3	2	3	5	3	2	1173070	1308360	1306790	3408560	1881600	2783650	0.0326888	0.469199
sp|Q62018|CTR9_MOUSE	sp|Q62018|CTR9_MOUSE	>sp|Q62018|CTR9_MOUSE RNA polymerase-associated protein CTR9 homolog OS=Mus musculus OX=10090 GN=Ctr9 PE=1 SV=2	4	4.9	133.41	12.758	2	3	6	1	4	4	257618	60527.2	212140	371676	318979	428358	0.0436726	0.473887
tr|A0A075B5P6|A0A075B5P6_MOUSE	tr|A0A075B5P6|A0A075B5P6_MOUSE;tr|A0A075B6A0|A0A075B6A0_MOUSE;sp|P01872|IGHM_MOUSE	>tr|A0A075B5P6|A0A075B5P6_MOUSE Immunoglobulin heavy constant mu (Fragment) OS=Mus musculus OX=10090 GN=Ighm PE=1 SV=1;>tr|A0A075B6A0|A0A075B6A0_MOUSE Immunoglobulin heavy constant mu (Fragment) OS=Mus musculus OX=10090 GN=Ighm PE=1 SV=2;>sp|P01872|IGHM_MO	13	32.1	49.943	108.67	8	14	15	25	22	27	20413000	25739200	25565900	44327400	56151500	50540000	0.00232451	0.474895
sp|O35730|RING1_MOUSE	sp|O35730|RING1_MOUSE	>sp|O35730|RING1_MOUSE E3 ubiquitin-protein ligase RING1 OS=Mus musculus OX=10090 GN=Ring1 PE=1 SV=2	1	7.6	42.63	4.3945	0	2	0	1	3	0	214537	377506	400581	608442	847022	583870	0.0270356	0.486739
sp|Q8VBT9|ASPC1_MOUSE	sp|Q8VBT9|ASPC1_MOUSE;tr|A2AC05|A2AC05_MOUSE	>sp|Q8VBT9|ASPC1_MOUSE Tether containing UBX domain for GLUT4 OS=Mus musculus OX=10090 GN=Aspscr1 PE=1 SV=1;>tr|A2AC05|A2AC05_MOUSE Tether-containing UBX domain for GLUT4 (Fragment) OS=Mus musculus OX=10090 GN=Aspscr1 PE=1 SV=1	4	16.7	59.795	8.4509	0	0	2	3	1	1	363319	428715	219166	841347	740937	479352	0.048078	0.490484
sp|Q9Z0H8|CLIP2_MOUSE	sp|Q9Z0H8|CLIP2_MOUSE	>sp|Q9Z0H8|CLIP2_MOUSE CAP-Gly domain-containing linker protein 2 OS=Mus musculus OX=10090 GN=Clip2 PE=1 SV=2	2	2.7	115.91	3.9304	0	0	0	0	2	0	37650.8	NaN	47887.5	100003	70096.6	89744.6	0.0350395	0.493786
tr|F8WHU9|F8WHU9_MOUSE	tr|F8WHU9|F8WHU9_MOUSE;sp|Q62384|ZPR1_MOUSE	>tr|F8WHU9|F8WHU9_MOUSE Zinc finger protein ZPR1 (Fragment) OS=Mus musculus OX=10090 GN=Zpr1 PE=1 SV=1;>sp|Q62384|ZPR1_MOUSE Zinc finger protein ZPR1 OS=Mus musculus OX=10090 GN=Zpr1 PE=1 SV=1	6	23.3	42.327	15.652	0	1	2	10	7	6	1123110	1684690	1304210	3049580	2751540	2499770	0.00368484	0.49537
tr|F7ABX5|F7ABX5_MOUSE	tr|F7ABX5|F7ABX5_MOUSE;tr|Q3U9H3|Q3U9H3_MOUSE;tr|D3YZR8|D3YZR8_MOUSE;sp|Q61337|BAD_MOUSE	>tr|F7ABX5|F7ABX5_MOUSE Bcl2-associated agonist of cell death (Fragment) OS=Mus musculus OX=10090 GN=Bad PE=1 SV=1;>tr|Q3U9H3|Q3U9H3_MOUSE Bcl-associated death promoter, isoform CRA_a OS=Mus musculus OX=10090 GN=Bad PE=1 SV=1;>tr|D3YZR8|D3YZR8_MOUSE Bcl2-a	1	18	17.245	5.7125	0	1	1	1	0	1	1376560	1260960	1410820	2971000	2870300	2289030	0.00331946	0.497931
sp|Q8VD62|CK068_MOUSE	sp|Q8VD62|CK068_MOUSE	>sp|Q8VD62|CK068_MOUSE UPF0696 protein C11orf68 homolog OS=Mus musculus OX=10090 GN=Bles03 PE=1 SV=2	2	8.1	31.845	7.5477	4	3	2	3	4	2	1552270	2074030	1279660	3246340	3874590	2430710	0.0317975	0.513625
sp|Q9DBG5|PLIN3_MOUSE	sp|Q9DBG5|PLIN3_MOUSE;tr|A0A3B2WCW2|A0A3B2WCW2_MOUSE	>sp|Q9DBG5|PLIN3_MOUSE Perilipin-3 OS=Mus musculus OX=10090 GN=Plin3 PE=1 SV=1;>tr|A0A3B2WCW2|A0A3B2WCW2_MOUSE Perilipin-3 (Fragment) OS=Mus musculus OX=10090 GN=Plin3 PE=1 SV=1	8	27.2	47.262	30.51	3	5	6	8	5	10	3041450	2229460	2622520	5544910	4790570	4981590	0.00161453	0.515336
sp|Q91WD5|NDUS2_MOUSE	sp|Q91WD5|NDUS2_MOUSE;tr|D3YXT0|D3YXT0_MOUSE	>sp|Q91WD5|NDUS2_MOUSE NADH dehydrogenase [ubiquinone] iron-sulfur protein 2, mitochondrial OS=Mus musculus OX=10090 GN=Ndufs2 PE=1 SV=1;>tr|D3YXT0|D3YXT0_MOUSE NADH dehydrogenase [ubiquinone] iron-sulfur protein 2, mitochondrial OS=Mus musculus OX=10090 G	7	21.8	52.625	49.38	7	5	1	10	8	7	3932240	2903080	3465500	6098470	7390450	6187760	0.00364276	0.523504
sp|Q9CX99|GRAP_MOUSE	sp|Q9CX99|GRAP_MOUSE	>sp|Q9CX99|GRAP_MOUSE GRB2-related adapter protein OS=Mus musculus OX=10090 GN=Grap PE=1 SV=1	1	10.6	25.277	3.2883	0	1	0	1	1	1	NaN	751617	659583	1567150	1126760	1226220	0.0417069	0.539982
sp|Q6PGL7|WASC2_MOUSE	sp|Q6PGL7|WASC2_MOUSE;tr|A0A0N4SUJ0|A0A0N4SUJ0_MOUSE	>sp|Q6PGL7|WASC2_MOUSE WASH complex subunit 2 OS=Mus musculus OX=10090 GN=Washc2 PE=1 SV=1;>tr|A0A0N4SUJ0|A0A0N4SUJ0_MOUSE WASH complex subunit 2 (Fragment) OS=Mus musculus OX=10090 GN=Washc2 PE=1 SV=1	7	9.4	145.31	16.434	2	0	1	5	2	4	442927	381843	286672	783249	729499	529244	0.0258322	0.544293
sp|Q67FY2|BCL9L_MOUSE	sp|Q67FY2|BCL9L_MOUSE	>sp|Q67FY2|BCL9L_MOUSE B-cell CLL/lymphoma 9-like protein OS=Mus musculus OX=10090 GN=Bcl9l PE=1 SV=1	2	2.1	156.68	4.8072	0	2	1	2	1	2	160343	285050	213464	446540	444961	317721	0.0304801	0.54486
sp|Q9D2G2|ODO2_MOUSE	sp|Q9D2G2|ODO2_MOUSE	>sp|Q99N69|LPXN_MOUSE Leupaxin OS=Mus musculus OX=10090 GN=Lpxn PE=1 SV=2	4	14.2	43.478	15.603	3	2	0	3	3	2	4826020	4340880	3232570	9341350	6408790	6879580	0.029126	0.547929
sp|Q5SVQ0|KAT7_MOUSE	sp|Q5SVQ0|KAT7_MOUSE	>sp|Q5SVQ0|KAT7_MOUSE Histone acetyltransferase KAT7 OS=Mus musculus OX=10090 GN=Kat7 PE=1 SV=1	1	2.4	70.641	3.7338	1	1	1	1	2	2	498031	372639	475218	711899	846121	877506	0.00469391	0.552607
sp|P61327|MGN_MOUSE	sp|P61327|MGN_MOUSE;sp|Q9CQL1|MGN2_MOUSE;tr|A0A023T778|A0A023T778_MOUSE;tr|G3UZW7|G3UZW7_MOUSE	>sp|P61327|MGN_MOUSE Protein mago nashi homolog OS=Mus musculus OX=10090 GN=Magoh PE=2 SV=1;>sp|Q9CQL1|MGN2_MOUSE Protein mago nashi homolog 2 OS=Mus musculus OX=10090 GN=Magohb PE=2 SV=1;>tr|A0A023T778|A0A023T778_MOUSE Mago nashi protein OS=Mus musculus O	4	40.4	17.163	28.581	5	7	8	7	5	8	10131300	12698200	10950600	21940500	17581000	20574100	0.0041969	0.562106
sp|Q9QUG9|GRP2_MOUSE	sp|Q9QUG9|GRP2_MOUSE	>sp|Q9QUG9|GRP2_MOUSE RAS guanyl-releasing protein 2 OS=Mus musculus OX=10090 GN=Rasgrp2 PE=1 SV=2	1	3.1	69.445	3.033	0	0	0	2	0	0	106004	52351.7	49712.1	128943	119923	119599	0.0452188	0.564688
tr|Q80ZP8|Q80ZP8_MOUSE	tr|Q80ZP8|Q80ZP8_MOUSE;tr|Q3TMX5|Q3TMX5_MOUSE;sp|Q9CXI5|MANF_MOUSE;tr|F6USD5|F6USD5_MOUSE;tr|F6T4L3|F6T4L3_MOUSE	>tr|Q80ZP8|Q80ZP8_MOUSE Armet protein OS=Mus musculus OX=10090 GN=Manf PE=1 SV=1;>tr|Q3TMX5|Q3TMX5_MOUSE Arginine-rich, mutated in early stage tumors, isoform CRA_b OS=Mus musculus OX=10090 GN=Manf PE=1 SV=1;>sp|Q9CXI5|MANF_MOUSE Mesencephalic astrocyte-de	5	32.7	19.012	14.55	2	2	2	5	4	4	5530930	7408710	7696510	13456500	10585900	12451100	0.00810009	0.565475
sp|Q6VGS5|DAPLE_MOUSE	sp|Q6VGS5|DAPLE_MOUSE	>sp|Q6VGS5|DAPLE_MOUSE Protein Daple OS=Mus musculus OX=10090 GN=Ccdc88c PE=1 SV=1	2	1.5	226.53	3.9101	0	0	1	0	0	1	178376	86437.9	110469	207657	218770	234518	0.0291565	0.567797
sp|Q9DAK9|PHP14_MOUSE	sp|Q9DAK9|PHP14_MOUSE	>sp|Q9DAK9|PHP14_MOUSE 14 kDa phosphohistidine phosphatase OS=Mus musculus OX=10090 GN=Phpt1 PE=1 SV=1	7	58.9	13.996	28.592	5	11	11	11	8	11	21612400	25703600	25360100	47950800	30868400	48723400	0.0375816	0.569818
tr|A0A338P7E3|A0A338P7E3_MOUSE	tr|A0A338P7E3|A0A338P7E3_MOUSE;tr|A0A338P711|A0A338P711_MOUSE;sp|C0HKG6|RNT2B_MOUSE;sp|C0HKG5|RNT2A_MOUSE	>tr|A0A338P7E3|A0A338P7E3_MOUSE Ribonuclease T2-B OS=Mus musculus OX=10090 GN=Rnaset2b PE=1 SV=1;>tr|A0A338P711|A0A338P711_MOUSE Ribonuclease T2-B (Fragment) OS=Mus musculus OX=10090 GN=Rnaset2b PE=1 SV=1;>sp|C0HKG6|RNT2B_MOUSE Ribonuclease T2-B OS=Mus mus	3	20.9	18.783	27.836	3	3	2	4	3	4	4010810	2401000	3833700	6057500	5821280	5871130	0.00827905	0.577215
sp|Q8R3N6|THOC1_MOUSE	sp|Q8R3N6|THOC1_MOUSE;tr|A0A3Q4EBV8|A0A3Q4EBV8_MOUSE	>sp|Q8R3N6|THOC1_MOUSE THO complex subunit 1 OS=Mus musculus OX=10090 GN=Thoc1 PE=1 SV=1;>tr|A0A3Q4EBV8|A0A3Q4EBV8_MOUSE THO complex subunit 1 (Fragment) OS=Mus musculus OX=10090 GN=Thoc1 PE=4 SV=1	4	6.4	75.435	12.429	3	2	1	3	4	3	641887	774673	439643	1155920	1185490	850367	0.0371168	0.581558
sp|Q9JJZ6|KLF13_MOUSE	sp|Q9JJZ6|KLF13_MOUSE	>sp|Q9JJZ6|KLF13_MOUSE Krueppel-like factor 13 OS=Mus musculus OX=10090 GN=Klf13 PE=1 SV=2	1	5.9	31.136	23.713	1	1	1	1	0	2	1336080	1780420	1684250	2386260	NaN	3109620	0.0374069	0.582345
tr|B1AX95|B1AX95_MOUSE	tr|B1AX95|B1AX95_MOUSE;sp|Q9DBS2|TPRGL_MOUSE	>tr|B1AX95|B1AX95_MOUSE Transformation-related protein 63-regulated-like OS=Mus musculus OX=10090 GN=Tprgl PE=1 SV=1;>sp|Q9DBS2|TPRGL_MOUSE Tumor protein p63-regulated gene 1-like protein OS=Mus musculus OX=10090 GN=Tprg1l PE=1 SV=1	1	15.5	23.064	33.079	0	0	1	1	2	3	693082	1117730	1063260	1775590	1451660	1703310	0.0143919	0.58291
sp|Q9EQ20|MMSA_MOUSE	sp|Q9EQ20|MMSA_MOUSE	>sp|Q9EQ20|MMSA_MOUSE Methylmalonate-semialdehyde dehydrogenase [acylating], mitochondrial OS=Mus musculus OX=10090 GN=Aldh6a1 PE=1 SV=1	5	15.5	57.915	15.318	2	5	2	4	3	3	1028300	888781	1111220	1780340	1618790	1793360	0.00109611	0.583208
sp|P70202|LXN_MOUSE	sp|P70202|LXN_MOUSE	>sp|P70202|LXN_MOUSE Latexin OS=Mus musculus OX=10090 GN=Lxn PE=1 SV=2	4	17.6	25.492	28.219	5	5	3	9	7	7	13769700	9300380	12199100	24859300	15639600	19772300	0.048523	0.585175
tr|Q8C1C2|Q8C1C2_MOUSE	tr|Q8C1C2|Q8C1C2_MOUSE;tr|E9Q7N5|E9Q7N5_MOUSE;sp|Q8R2Q4|RRF2M_MOUSE	>tr|Q8C1C2|Q8C1C2_MOUSE Ribosome-releasing factor 2, mitochondrial OS=Mus musculus OX=10090 GN=Gfm2 PE=1 SV=1;>tr|E9Q7N5|E9Q7N5_MOUSE Ribosome-releasing factor 2, mitochondrial OS=Mus musculus OX=10090 GN=Gfm2 PE=1 SV=1;>sp|Q8R2Q4|RRF2M_MOUSE Ribosome-rele	3	7.9	60.496	7.1873	0	0	0	0	1	2	162337	123450	179934	206410	262203	326065	0.046084	0.58605
sp|P08207|S10AA_MOUSE	sp|P08207|S10AA_MOUSE	>sp|P08207|S10AA_MOUSE Protein S100-A10 OS=Mus musculus OX=10090 GN=S100a10 PE=1 SV=2	2	32	11.186	7.4819	2	1	2	4	4	5	14414200	9211340	10072500	17167000	19917100	20381000	0.0139586	0.586409
sp|Q9D735|TRIR_MOUSE	sp|Q9D735|TRIR_MOUSE	>sp|Q9D735|TRIR_MOUSE Telomerase RNA component interacting RNase OS=Mus musculus OX=10090 GN=Trir PE=1 SV=1	3	23.7	18.376	7.1041	1	1	1	0	2	2	10083000	10987100	11599600	17390700	16542200	21643500	0.00958814	0.587834
tr|D3YYK0|D3YYK0_MOUSE	tr|D3YYK0|D3YYK0_MOUSE;sp|Q8K4F5|ABHDB_MOUSE	>tr|D3YYK0|D3YYK0_MOUSE Abhydrolase domain containing 11, isoform CRA_b OS=Mus musculus OX=10090 GN=Abhd11 PE=1 SV=1;>sp|Q8K4F5|ABHDB_MOUSE Protein ABHD11 OS=Mus musculus OX=10090 GN=Abhd11 PE=1 SV=1	2	12.3	24.881	6.6169	1	2	3	2	1	4	695769	1523160	1461810	1832500	2295850	2088680	0.0470065	0.592041
sp|Q8C570|RAE1L_MOUSE	sp|Q8C570|RAE1L_MOUSE	>sp|Q8C570|RAE1L_MOUSE mRNA export factor OS=Mus musculus OX=10090 GN=Rae1 PE=1 SV=1	7	21.2	40.965	24.443	5	8	6	11	7	6	8963020	5571350	8211130	14199800	12392800	11638800	0.0156428	0.594943
sp|P35486|ODPA_MOUSE	sp|P35486|ODPA_MOUSE	>sp|P35486|ODPA_MOUSE Pyruvate dehydrogenase E1 component subunit alpha, somatic form, mitochondrial OS=Mus musculus OX=10090 GN=Pdha1 PE=1 SV=1	13	31.3	43.231	59.935	7	8	8	14	11	13	9992900	11635100	9810300	19349400	18894500	14425200	0.013418	0.596902
tr|F6U529|F6U529_MOUSE	tr|F6U529|F6U529_MOUSE	>tr|F6U529|F6U529_MOUSE Glutaminase kidney isoform, mitochondrial (Fragment) OS=Mus musculus OX=10090 GN=Gls PE=1 SV=1	1	11.5	25.893	2.9608	1	1	1	1	1	1	1371940	1597020	1340950	2251260	2262720	2637460	0.00324505	0.602663
tr|E9Q9J5|E9Q9J5_MOUSE	tr|E9Q9J5|E9Q9J5_MOUSE;tr|Q3V406|Q3V406_MOUSE;sp|Q9D6J5|NDUB8_MOUSE;tr|F6VCY0|F6VCY0_MOUSE	>tr|E9Q9J5|E9Q9J5_MOUSE NADH dehydrogenase [ubiquinone] 1 beta subcomplex subunit 8, mitochondrial (Fragment) OS=Mus musculus OX=10090 GN=Ndufb8 PE=1 SV=8;>tr|Q3V406|Q3V406_MOUSE NADH dehydrogenase [ubiquinone] 1 beta subcomplex subunit 8, mitochondrial OS	2	23.2	15.641	5.7858	1	1	1	2	2	2	1516720	1154190	NaN	2043410	2195200	2406680	0.0194407	0.602888
sp|Q8R086|SUOX_MOUSE	sp|Q8R086|SUOX_MOUSE	>sp|Q8R086|SUOX_MOUSE Sulfite oxidase, mitochondrial OS=Mus musculus OX=10090 GN=Suox PE=1 SV=2	7	24	60.755	35.937	2	7	5	15	11	9	3470910	3447160	3645210	5753450	5222710	6505440	0.00362831	0.604251
tr|A0A087WPF8|A0A087WPF8_MOUSE	tr|A0A087WPF8|A0A087WPF8_MOUSE;tr|A0A087WSR2|A0A087WSR2_MOUSE;tr|E9QN99|E9QN99_MOUSE;tr|A0A087WP24|A0A087WP24_MOUSE;tr|A0A087WRJ2|A0A087WRJ2_MOUSE;sp|Q8VCR7|ABHEB_MOUSE	>tr|A0A087WPF8|A0A087WPF8_MOUSE Protein ABHD14B (Fragment) OS=Mus musculus OX=10090 GN=Abhd14b PE=1 SV=1;>tr|A0A087WSR2|A0A087WSR2_MOUSE Protein ABHD14B (Fragment) OS=Mus musculus OX=10090 GN=Abhd14b PE=1 SV=1;>tr|E9QN99|E9QN99_MOUSE Protein ABHD14B OS=Mus	3	24.1	18.398	14.494	1	2	2	1	2	1	2917160	2944850	1670620	3883240	3761240	4810210	0.037421	0.604803
sp|P97450|ATP5J_MOUSE	sp|P97450|ATP5J_MOUSE	>sp|P97450|ATP5J_MOUSE ATP synthase-coupling factor 6, mitochondrial OS=Mus musculus OX=10090 GN=Atp5pf PE=1 SV=1	7	49.1	12.496	126.29	9	10	12	14	15	14	147208000	198889000	163391000	280304000	282910000	277757000	0.00196647	0.605833
tr|Q3TCF3|Q3TCF3_MOUSE	tr|Q3TCF3|Q3TCF3_MOUSE;sp|P18337|LYAM1_MOUSE;tr|B1B507|B1B507_MOUSE	>tr|Q3TCF3|Q3TCF3_MOUSE L-selectin OS=Mus musculus OX=10090 GN=Sell PE=1 SV=1;>sp|P18337|LYAM1_MOUSE L-selectin OS=Mus musculus OX=10090 GN=Sell PE=1 SV=1;>tr|B1B507|B1B507_MOUSE L-selectin OS=Mus musculus OX=10090 GN=Sell PE=1 SV=1	1	3.3	38.462	3.9308	1	0	0	1	0	1	830264	863401	817127	1632770	1179260	1284990	0.0184544	0.612834
sp|Q9D0I9|SYRC_MOUSE	sp|Q9D0I9|SYRC_MOUSE	>sp|Q9D0I9|SYRC_MOUSE Arginine--tRNA ligase, cytoplasmic OS=Mus musculus OX=10090 GN=Rars PE=1 SV=2	5	9.7	75.673	11.38	1	1	3	6	5	2	365883	395971	315484	640846	592055	510385	0.00768372	0.617993
sp|Q91VW3|SH3L3_MOUSE	sp|Q91VW3|SH3L3_MOUSE	>sp|Q91VW3|SH3L3_MOUSE SH3 domain-binding glutamic acid-rich-like protein 3 OS=Mus musculus OX=10090 GN=Sh3bgrl3 PE=1 SV=1	5	32.3	10.477	323.31	12	16	16	22	26	20	804590000	747073000	641270000	1405530000	1056730000	965537000	0.0444914	0.63975
sp|Q9R0P4|SMAP_MOUSE	sp|Q9R0P4|SMAP_MOUSE;tr|A0A0U1RPJ7|A0A0U1RPJ7_MOUSE;tr|D3YVR9|D3YVR9_MOUSE	>sp|Q9R0P4|SMAP_MOUSE Small acidic protein OS=Mus musculus OX=10090 GN=Smap PE=1 SV=1;>tr|A0A0U1RPJ7|A0A0U1RPJ7_MOUSE RIKEN cDNA 1110004F10 gene (Fragment) OS=Mus musculus OX=10090 GN=1110004F10Rik PE=1 SV=1;>tr|D3YVR9|D3YVR9_MOUSE MCG7316, isoform CRA_b O	4	25.4	20.046	52.555	3	3	5	6	6	7	28234000	37833400	47563700	57985800	68184100	51047000	0.0471184	0.641198
sp|Q60591|NFAC2_MOUSE	sp|Q60591|NFAC2_MOUSE;tr|A2AQC8|A2AQC8_MOUSE;tr|B5B2R5|B5B2R5_MOUSE	>sp|Q60591|NFAC2_MOUSE Nuclear factor of activated T-cells, cytoplasmic 2 OS=Mus musculus OX=10090 GN=Nfatc2 PE=1 SV=3;>tr|A2AQC8|A2AQC8_MOUSE Nuclear factor of activated T-cells c2 isoform IA-IIL-VIIa OS=Mus musculus OX=10090 GN=Nfatc2 PE=1 SV=1;>tr|B5B2R	10	16.5	100.02	43.274	6	9	8	15	14	16	3009840	3409080	3475990	6109450	4380140	4803910	0.0290982	0.647001
sp|P01901|HA1B_MOUSE	sp|P01901|HA1B_MOUSE;tr|Q3TH01|Q3TH01_MOUSE;tr|G3UXW2|G3UXW2_MOUSE	>sp|P01901|HA1B_MOUSE H-2 class I histocompatibility antigen, K-B alpha chain OS=Mus musculus OX=10090 GN=H2-K1 PE=1 SV=1;>tr|Q3TH01|Q3TH01_MOUSE H-2 class I histocompatibility antigen, K-K alpha chain OS=Mus musculus OX=10090 GN=H2-K1 PE=1 SV=1;>tr|G3UXW2	2	32	41.301	116.72	11	13	14	16	15	15	19385800	26327100	16204100	35114900	30382400	30161100	0.0296411	0.647272
sp|Q99JR8|SMRD2_MOUSE	sp|Q99JR8|SMRD2_MOUSE	>sp|Q99JR8|SMRD2_MOUSE SWI/SNF-related matrix-associated actin-dependent regulator of chromatin subfamily D member 2 OS=Mus musculus OX=10090 GN=Smarcd2 PE=1 SV=2	5	12.8	59.084	15.336	1	3	3	5	6	6	594043	959480	632422	1063180	1107420	1199040	0.0323762	0.648718
sp|P53994|RAB2A_MOUSE	sp|P53994|RAB2A_MOUSE	>sp|P53994|RAB2A_MOUSE Ras-related protein Rab-2A OS=Mus musculus OX=10090 GN=Rab2a PE=1 SV=1	3	16	23.547	10.736	3	4	3	5	3	5	2390150	1913760	1780200	3183990	2893160	3229060	0.00726383	0.653769
tr|E9QNL8|E9QNL8_MOUSE	tr|E9QNL8|E9QNL8_MOUSE;tr|E9Q5M7|E9Q5M7_MOUSE;sp|P24063|ITAL_MOUSE;tr|D3Z627|D3Z627_MOUSE;tr|D3YW95|D3YW95_MOUSE	>tr|E9QNL8|E9QNL8_MOUSE Integrin alpha-L OS=Mus musculus OX=10090 GN=Itgal PE=1 SV=1;>tr|E9Q5M7|E9Q5M7_MOUSE Integrin alpha-L OS=Mus musculus OX=10090 GN=Itgal PE=1 SV=1;>sp|P24063|ITAL_MOUSE Integrin alpha-L OS=Mus musculus OX=10090 GN=Itgal PE=1 SV=2;>tr	13	13.4	128.21	38.988	6	7	5	11	12	14	2993150	2578410	2733810	4063070	4707240	3923920	0.00561643	0.654263
sp|Q6P8X1|SNX6_MOUSE	sp|Q6P8X1|SNX6_MOUSE;tr|A0A1W2P701|A0A1W2P701_MOUSE	>sp|Q6P8X1|SNX6_MOUSE Sorting nexin-6 OS=Mus musculus OX=10090 GN=Snx6 PE=1 SV=2;>tr|A0A1W2P701|A0A1W2P701_MOUSE Sorting nexin-6 OS=Mus musculus OX=10090 GN=Snx6 PE=1 SV=1	4	15	46.648	12.085	0	3	2	2	4	3	1041570	971261	1101820	1278050	1779110	1699540	0.0267449	0.654792
sp|Q8BUK6|HOOK3_MOUSE	sp|Q8BUK6|HOOK3_MOUSE	>sp|Q8BUK6|HOOK3_MOUSE Protein Hook homolog 3 OS=Mus musculus OX=10090 GN=Hook3 PE=1 SV=2	3	5.8	83.217	8.1173	0	1	0	1	0	3	523160	344509	441452	712849	622907	659359	0.0167939	0.656163
sp|Q9CX60|LBH_MOUSE	sp|Q9CX60|LBH_MOUSE	>sp|Q9CX60|LBH_MOUSE Protein LBH OS=Mus musculus OX=10090 GN=Lbh PE=1 SV=1	4	38.1	12.138	45.887	3	2	8	9	11	9	14277100	19516100	17800700	27099000	24868700	26528900	0.00594602	0.657276
tr|A0A3Q4EBK4|A0A3Q4EBK4_MOUSE	tr|A0A3Q4EBK4|A0A3Q4EBK4_MOUSE;tr|Q6P1B9|Q6P1B9_MOUSE;sp|O08539|BIN1_MOUSE	>tr|A0A3Q4EBK4|A0A3Q4EBK4_MOUSE Myc box-dependent-interacting protein 1 OS=Mus musculus OX=10090 GN=Bin1 PE=4 SV=1;>tr|Q6P1B9|Q6P1B9_MOUSE Bin1 protein OS=Mus musculus OX=10090 GN=Bin1 PE=1 SV=1;>sp|O08539|BIN1_MOUSE Myc box-dependent-interacting protein 1	9	33.7	45.786	71.509	10	14	14	18	17	15	9194640	11914700	10787000	18847600	14906700	14740000	0.0237263	0.657734
tr|F8WJI3|F8WJI3_MOUSE	tr|F8WJI3|F8WJI3_MOUSE;sp|Q8R3Q6|CCD58_MOUSE;tr|A0A338P707|A0A338P707_MOUSE;tr|E9Q4B5|E9Q4B5_MOUSE	>tr|F8WJI3|F8WJI3_MOUSE Coiled-coil domain-containing protein 58 OS=Mus musculus OX=10090 GN=Ccdc58 PE=1 SV=1;>sp|Q8R3Q6|CCD58_MOUSE Coiled-coil domain-containing protein 58 OS=Mus musculus OX=10090 GN=Ccdc58 PE=1 SV=1;>tr|A0A338P707|A0A338P707_MOUSE Coile	2	23.9	15.601	6.7987	1	3	1	3	4	2	4537550	4898530	5008440	6073730	8196430	7605200	0.018766	0.66031
tr|Q923F1|Q923F1_MOUSE	tr|Q923F1|Q923F1_MOUSE;sp|Q61189|ICLN_MOUSE	>tr|Q923F1|Q923F1_MOUSE Chloride channel, nucleotide-sensitive, 1A OS=Mus musculus OX=10090 GN=Clns1a PE=1 SV=1;>sp|Q61189|ICLN_MOUSE Methylosome subunit pICln OS=Mus musculus OX=10090 GN=Clns1a PE=1 SV=1	6	32.8	26.522	26.01	3	3	3	6	6	5	12859000	8445670	11199800	17982500	15002500	16238700	0.0228659	0.660342
tr|E9Q1S3|E9Q1S3_MOUSE	tr|E9Q1S3|E9Q1S3_MOUSE;sp|Q01405|SC23A_MOUSE	>tr|E9Q1S3|E9Q1S3_MOUSE Protein transport protein SEC23 OS=Mus musculus OX=10090 GN=Sec23a PE=1 SV=1;>sp|Q01405|SC23A_MOUSE Protein transport protein Sec23A OS=Mus musculus OX=10090 GN=Sec23a PE=1 SV=2	4	9.9	82.955	11.587	1	4	3	3	0	0	537163	623002	447612	903037	857513	671082	0.034504	0.661193
sp|Q8K1M6|DNM1L_MOUSE	sp|Q8K1M6|DNM1L_MOUSE;tr|E9PUD2|E9PUD2_MOUSE;tr|A0A2U3TZ67|A0A2U3TZ67_MOUSE	>sp|Q8K1M6|DNM1L_MOUSE Dynamin-1-like protein OS=Mus musculus OX=10090 GN=Dnm1l PE=1 SV=2;>tr|E9PUD2|E9PUD2_MOUSE Dynamin-1-like protein OS=Mus musculus OX=10090 GN=Dnm1l PE=1 SV=1;>tr|A0A2U3TZ67|A0A2U3TZ67_MOUSE Dynamin-1-like protein OS=Mus musculus OX=1	8	14.7	82.657	28.855	3	5	4	8	6	7	1231870	1504870	1058640	2119030	1838550	1755470	0.0198472	0.664335
sp|Q9QYB5|ADDG_MOUSE	sp|Q9QYB5|ADDG_MOUSE	>sp|Q9QYB5|ADDG_MOUSE Gamma-adducin OS=Mus musculus OX=10090 GN=Add3 PE=1 SV=2	12	21.1	78.776	35.643	4	2	5	8	5	8	4257090	3278840	4238610	5559950	5741990	6418860	0.00883754	0.664447
sp|Q9QZE7|TSNAX_MOUSE	sp|Q9QZE7|TSNAX_MOUSE;tr|A0A1D5RLR0|A0A1D5RLR0_MOUSE	>sp|Q9QZE7|TSNAX_MOUSE Translin-associated protein X OS=Mus musculus OX=10090 GN=Tsnax PE=1 SV=1;>tr|A0A1D5RLR0|A0A1D5RLR0_MOUSE Translin-associated protein X OS=Mus musculus OX=10090 GN=Tsnax PE=1 SV=1	10	39.7	32.926	30.015	4	8	7	14	5	10	6933260	6845650	7209670	11846200	8869450	10749900	0.0163157	0.667034
tr|D3YYL1|D3YYL1_MOUSE	tr|D3YYL1|D3YYL1_MOUSE;tr|A0A0J9YV82|A0A0J9YV82_MOUSE;sp|Q921K9|BCL7B_MOUSE;sp|Q9CXE2|BCL7A_MOUSE	>tr|D3YYL1|D3YYL1_MOUSE B-cell CLL/lymphoma 7 protein family member B OS=Mus musculus OX=10090 GN=Bcl7b PE=1 SV=1;>tr|A0A0J9YV82|A0A0J9YV82_MOUSE B-cell CLL/lymphoma 7 protein family member B (Fragment) OS=Mus musculus OX=10090 GN=Bcl7b PE=1 SV=1;>sp|Q921K	1	7.6	16.088	2.7459	1	0	1	1	0	1	2448900	2088750	1532980	2731080	3058560	3292130	0.0324249	0.668441
tr|A2AJK8|A2AJK8_MOUSE	tr|A2AJK8|A2AJK8_MOUSE;sp|Q91Z38|TTC1_MOUSE	>tr|A2AJK8|A2AJK8_MOUSE Tetratricopeptide repeat protein 1 OS=Mus musculus OX=10090 GN=Ttc1 PE=1 SV=1;>sp|Q91Z38|TTC1_MOUSE Tetratricopeptide repeat protein 1 OS=Mus musculus OX=10090 GN=Ttc1 PE=1 SV=1	3	16	28.553	7.6169	1	0	1	2	2	2	3760740	4741260	4063350	5384280	6529060	6760050	0.0167414	0.672901
sp|Q3THG9|AASD1_MOUSE	sp|Q3THG9|AASD1_MOUSE;tr|A2A4P3|A2A4P3_MOUSE;tr|A2A4P4|A2A4P4_MOUSE	>sp|Q3THG9|AASD1_MOUSE Alanyl-tRNA editing protein Aarsd1 OS=Mus musculus OX=10090 GN=Aarsd1 PE=1 SV=2;>tr|A2A4P3|A2A4P3_MOUSE Predicted gene, 27029 OS=Mus musculus OX=10090 GN=Gm27029 PE=4 SV=1;>tr|A2A4P4|A2A4P4_MOUSE Predicted gene, 27029 OS=Mus musculus	6	22.3	44.97	14.698	6	1	3	2	4	2	1137460	1166040	1174100	1729170	1545960	1884980	0.00471802	0.673939
sp|P56391|CX6B1_MOUSE	sp|P56391|CX6B1_MOUSE;tr|A0A140LIU3|A0A140LIU3_MOUSE	>sp|P56391|CX6B1_MOUSE Cytochrome c oxidase subunit 6B1 OS=Mus musculus OX=10090 GN=Cox6b1 PE=1 SV=2;>tr|A0A140LIU3|A0A140LIU3_MOUSE Cytochrome c oxidase subunit 6B1 OS=Mus musculus OX=10090 GN=Cox6b1 PE=1 SV=1	5	70.9	10.071	31.541	8	6	6	11	9	10	38209800	39080600	39326700	59853400	53574100	59088100	0.000748408	0.67598
tr|G3X928|G3X928_MOUSE	tr|G3X928|G3X928_MOUSE;sp|Q6NZC7|S23IP_MOUSE	>tr|G3X928|G3X928_MOUSE SEC23-interacting protein OS=Mus musculus OX=10090 GN=Sec23ip PE=1 SV=1;>sp|Q6NZC7|S23IP_MOUSE SEC23-interacting protein OS=Mus musculus OX=10090 GN=Sec23ip PE=1 SV=2	5	8.2	110.76	13.922	0	3	2	2	3	2	1135100	1507970	1399020	2023220	2097790	1832720	0.00939716	0.678917
sp|Q6P5F9|XPO1_MOUSE	sp|Q6P5F9|XPO1_MOUSE	>sp|Q6P5F9|XPO1_MOUSE Exportin-1 OS=Mus musculus OX=10090 GN=Xpo1 PE=1 SV=1	3	3.6	123.09	8.9941	1	2	0	4	4	6	326357	376355	496322	566566	618729	575401	0.0240965	0.681
sp|P27048|RSMB_MOUSE	sp|P27048|RSMB_MOUSE;sp|P63163|RSMN_MOUSE	>sp|P27048|RSMB_MOUSE Small nuclear ribonucleoprotein-associated protein B OS=Mus musculus OX=10090 GN=Snrpb PE=1 SV=1;>sp|P63163|RSMN_MOUSE Small nuclear ribonucleoprotein-associated protein N OS=Mus musculus OX=10090 GN=Snrpn PE=1 SV=1	5	16	23.656	83.129	10	11	11	8	11	13	11720600	8234890	11897900	16074300	13339300	16803300	0.0396373	0.689215
sp|O35954|PITM1_MOUSE	sp|O35954|PITM1_MOUSE	>sp|O35954|PITM1_MOUSE Membrane-associated phosphatidylinositol transfer protein 1 OS=Mus musculus OX=10090 GN=Pitpnm1 PE=1 SV=1	6	6.4	134.94	18.245	3	3	3	6	4	6	456794	442049	504501	711790	710523	613760	0.00493419	0.689241
sp|Q64433|CH10_MOUSE	sp|Q64433|CH10_MOUSE;tr|Q9JI95|Q9JI95_MOUSE	>sp|Q64433|CH10_MOUSE 10 kDa heat shock protein, mitochondrial OS=Mus musculus OX=10090 GN=Hspe1 PE=1 SV=2;>tr|Q9JI95|Q9JI95_MOUSE CPN10-like protein OS=Mus musculus OX=10090 GN=Cpn10-rs1 PE=3 SV=1	9	66.7	10.963	82.158	31	26	27	33	37	38	355354000	441083000	347795000	596149000	550734000	503029000	0.0137969	0.693511
sp|P27546|MAP4_MOUSE	sp|P27546|MAP4_MOUSE	>sp|P27546|MAP4_MOUSE Microtubule-associated protein 4 OS=Mus musculus OX=10090 GN=Map4 PE=1 SV=3	15	25.1	117.43	45.861	4	7	11	13	12	10	3582980	3772300	4828870	6409450	6288060	4863840	0.0465547	0.693805
tr|B7ZCU2|B7ZCU2_MOUSE	tr|B7ZCU2|B7ZCU2_MOUSE;tr|B7ZCU5|B7ZCU5_MOUSE;tr|B7ZCU4|B7ZCU4_MOUSE;tr|B7ZCU3|B7ZCU3_MOUSE;tr|B7ZCU0|B7ZCU0_MOUSE;tr|J3QNK8|J3QNK8_MOUSE;sp|Q8CBW3|ABI1_MOUSE	>tr|B7ZCU2|B7ZCU2_MOUSE Abl interactor 1 OS=Mus musculus OX=10090 GN=Abi1 PE=1 SV=1;>tr|B7ZCU5|B7ZCU5_MOUSE Abl interactor 1 OS=Mus musculus OX=10090 GN=Abi1 PE=1 SV=1;>tr|B7ZCU4|B7ZCU4_MOUSE Abl interactor 1 OS=Mus musculus OX=10090 GN=Abi1 PE=1 SV=1;>tr|	5	20.9	43.174	19.017	2	3	4	7	8	3	3809580	4446840	3541130	5894780	4873210	6141790	0.0225705	0.697676
sp|P51125|ICAL_MOUSE	sp|P51125|ICAL_MOUSE;tr|Q8CE80|Q8CE80_MOUSE;tr|A0A338P6J9|A0A338P6J9_MOUSE;tr|Q921U7|Q921U7_MOUSE;tr|Q8C281|Q8C281_MOUSE;tr|Q8CE04|Q8CE04_MOUSE	>sp|P51125|ICAL_MOUSE Calpastatin OS=Mus musculus OX=10090 GN=Cast PE=1 SV=2;>tr|Q8CE80|Q8CE80_MOUSE Calpastatin OS=Mus musculus OX=10090 GN=Cast PE=1 SV=1;>tr|A0A338P6J9|A0A338P6J9_MOUSE Calpastatin (Fragment) OS=Mus musculus OX=10090 GN=Cast PE=1 SV=1;>t	17	29.9	84.921	309.37	24	20	23	34	36	42	20193100	19510400	23545900	35716700	28831200	25971600	0.0447337	0.698738
tr|E9Q616|E9Q616_MOUSE	tr|E9Q616|E9Q616_MOUSE	>tr|E9Q616|E9Q616_MOUSE AHNAK nucleoprotein (desmoyokin) OS=Mus musculus OX=10090 GN=Ahnak PE=1 SV=1	76	41	604.25	272.21	39	43	50	78	74	76	2936290	3972140	3540610	5205930	5307780	4434490	0.0212389	0.699017
sp|Q9CXY6|ILF2_MOUSE	sp|Q9CXY6|ILF2_MOUSE	>sp|Q9CXY6|ILF2_MOUSE Interleukin enhancer-binding factor 2 OS=Mus musculus OX=10090 GN=Ilf2 PE=1 SV=1	6	18.7	43.062	19.303	6	6	10	8	9	9	5278000	5927780	4972660	8656640	8050650	6427990	0.0325941	0.699297
sp|P47856|GFPT1_MOUSE	sp|P47856|GFPT1_MOUSE	>sp|P47856|GFPT1_MOUSE Glutamine--fructose-6-phosphate aminotransferase [isomerizing] 1 OS=Mus musculus OX=10090 GN=Gfpt1 PE=1 SV=3	3	7	78.538	13.759	2	4	2	5	6	2	431964	362388	438293	590834	551069	617538	0.00481787	0.700589
sp|Q9Z2U4|ELF4_MOUSE	sp|Q9Z2U4|ELF4_MOUSE	>sp|Q9Z2U4|ELF4_MOUSE ETS-related transcription factor Elf-4 OS=Mus musculus OX=10090 GN=Elf4 PE=1 SV=2	1	4.1	70.799	2.9997	1	2	3	0	1	2	586120	506777	678681	782190	887119	843786	0.0132362	0.704939
tr|F8WHZ9|F8WHZ9_MOUSE	tr|F8WHZ9|F8WHZ9_MOUSE;tr|F8WGR0|F8WGR0_MOUSE;sp|Q9QYC0|ADDA_MOUSE;tr|E9Q1K3|E9Q1K3_MOUSE	>tr|F8WHZ9|F8WHZ9_MOUSE Alpha-adducin OS=Mus musculus OX=10090 GN=Add1 PE=1 SV=1;>tr|F8WGR0|F8WGR0_MOUSE Alpha-adducin OS=Mus musculus OX=10090 GN=Add1 PE=1 SV=1;>sp|Q9QYC0|ADDA_MOUSE Alpha-adducin OS=Mus musculus OX=10090 GN=Add1 PE=1 SV=2;>tr|E9Q1K3|E9Q1	12	22.2	73.163	43.545	5	7	5	11	9	10	5427800	5472750	7090910	7916920	8749070	8683120	0.0157484	0.709747
tr|D3Z7C0|D3Z7C0_MOUSE	tr|D3Z7C0|D3Z7C0_MOUSE;sp|Q9Z2Q5|RM40_MOUSE	>tr|D3Z7C0|D3Z7C0_MOUSE 39S ribosomal protein L40, mitochondrial OS=Mus musculus OX=10090 GN=Mrpl40 PE=1 SV=1;>sp|Q9Z2Q5|RM40_MOUSE 39S ribosomal protein L40, mitochondrial OS=Mus musculus OX=10090 GN=Mrpl40 PE=1 SV=2	3	26.5	19.378	7.2473	2	1	1	2	1	3	3317040	3559680	2714150	3979740	5223520	4259020	0.0464334	0.712425
tr|G5E8V9|G5E8V9_MOUSE	tr|G5E8V9|G5E8V9_MOUSE;tr|A2RSX9|A2RSX9_MOUSE;tr|E9Q3G5|E9Q3G5_MOUSE	>tr|G5E8V9|G5E8V9_MOUSE ADP-ribosylation factor-interacting protein 1 OS=Mus musculus OX=10090 GN=Arfip1 PE=1 SV=1;>tr|A2RSX9|A2RSX9_MOUSE ADP-ribosylation factor-interacting protein 1 OS=Mus musculus OX=10090 GN=Arfip1 PE=1 SV=1;>tr|E9Q3G5|E9Q3G5_MOUSE AD	3	13.4	41.518	35.812	2	1	2	3	2	4	2745790	2020300	2568650	3710330	3130690	3445140	0.0232837	0.713069
sp|P19973|LSP1_MOUSE	sp|P19973|LSP1_MOUSE	>sp|P19973|LSP1_MOUSE Lymphocyte-specific protein 1 OS=Mus musculus OX=10090 GN=Lsp1 PE=1 SV=2	2	57.9	36.713	323.31	45	54	51	60	55	55	331188000	351792000	410701000	489960000	552362000	491442000	0.00957773	0.71307
sp|P42232|STA5B_MOUSE	sp|P42232|STA5B_MOUSE	>sp|P42232|STA5B_MOUSE Signal transducer and activator of transcription 5B OS=Mus musculus OX=10090 GN=Stat5b PE=1 SV=1	4	20.2	90.001	12.587	2	2	2	4	1	4	1544540	1435840	1874320	2051030	2264800	2429870	0.0212818	0.719673
sp|Q8R3B1|PLCD1_MOUSE	sp|Q8R3B1|PLCD1_MOUSE;tr|G5DDB7|G5DDB7_MOUSE	>sp|Q8R3B1|PLCD1_MOUSE 1-phosphatidylinositol 4,5-bisphosphate phosphodiesterase delta-1 OS=Mus musculus OX=10090 GN=Plcd1 PE=1 SV=2;>tr|G5DDB7|G5DDB7_MOUSE Phosphoinositide phospholipase C OS=Mus musculus OX=10090 GN=Plcd1 PE=1 SV=1	1	1.7	85.872	4.4436	2	1	3	2	2	2	17475300	17953700	14823800	22856000	22927300	23892600	0.00326244	0.721236
sp|Q8K2B3|SDHA_MOUSE	sp|Q8K2B3|SDHA_MOUSE	>sp|Q8K2B3|SDHA_MOUSE Succinate dehydrogenase [ubiquinone] flavoprotein subunit, mitochondrial OS=Mus musculus OX=10090 GN=Sdha PE=1 SV=1	16	30.3	72.585	82.4	12	11	8	14	9	15	19263700	15667600	16436200	22503700	24733700	23671100	0.00682294	0.724419
sp|Q8CAK1|CAF17_MOUSE	sp|Q8CAK1|CAF17_MOUSE	>sp|Q8CAK1|CAF17_MOUSE Putative transferase CAF17 homolog, mitochondrial OS=Mus musculus OX=10090 GN=Iba57 PE=1 SV=1	1	3.6	38.399	4.5106	1	1	0	0	1	1	525915	493282	594750	693965	801187	730252	0.00935321	0.725238
sp|Q9D6J6|NDUV2_MOUSE	sp|Q9D6J6|NDUV2_MOUSE	>sp|Q9D6J6|NDUV2_MOUSE NADH dehydrogenase [ubiquinone] flavoprotein 2, mitochondrial OS=Mus musculus OX=10090 GN=Ndufv2 PE=1 SV=2	7	34.3	27.285	104.98	13	11	16	18	17	13	18849800	23980100	22974400	33199800	28523000	28157700	0.0237082	0.732131
sp|P42125|ECI1_MOUSE	sp|P42125|ECI1_MOUSE;tr|A0A3Q4EC00|A0A3Q4EC00_MOUSE	>sp|P42125|ECI1_MOUSE Enoyl-CoA delta isomerase 1, mitochondrial OS=Mus musculus OX=10090 GN=Eci1 PE=1 SV=2;>tr|A0A3Q4EC00|A0A3Q4EC00_MOUSE Enoyl-CoA delta isomerase 1, mitochondrial OS=Mus musculus OX=10090 GN=Eci1 PE=4 SV=1	7	29.8	32.25	30.298	7	8	7	9	8	11	16286700	15679200	16665500	23542900	18317400	24563200	0.0386819	0.732141
tr|A0A075B5K2|A0A075B5K2_MOUSE	tr|A0A075B5K2|A0A075B5K2_MOUSE	>tr|A0A075B5K2|A0A075B5K2_MOUSE Immunoglobulin kappa chain variable 9-124 OS=Mus musculus OX=10090 GN=Igkv9-124 PE=1 SV=7	1	18.9	10.419	5.2041	1	1	1	2	2	3	1871820	1550660	1898830	2159020	2600450	2491790	0.0207331	0.733846
sp|Q9Z2I9|SUCB1_MOUSE	sp|Q9Z2I9|SUCB1_MOUSE	>sp|Q9Z2I9|SUCB1_MOUSE Succinate--CoA ligase [ADP-forming] subunit beta, mitochondrial OS=Mus musculus OX=10090 GN=Sucla2 PE=1 SV=2	7	20.7	50.113	22.387	2	5	3	5	6	5	4535380	4891400	4258800	6287810	6193990	6106950	0.00101173	0.736229
sp|Q99JY9|ARP3_MOUSE	sp|Q99JY9|ARP3_MOUSE	>sp|Q99JY9|ARP3_MOUSE Actin-related protein 3 OS=Mus musculus OX=10090 GN=Actr3 PE=1 SV=3	19	53.6	47.357	200.58	34	44	46	45	46	48	86235400	98420400	100427000	131031000	125798000	128992000	0.00201138	0.738899
sp|P30416|FKBP4_MOUSE	sp|P30416|FKBP4_MOUSE	>sp|P30416|FKBP4_MOUSE Peptidyl-prolyl cis-trans isomerase FKBP4 OS=Mus musculus OX=10090 GN=Fkbp4 PE=1 SV=5	11	26	51.572	49.591	11	12	10	14	13	13	7851610	7562540	7965090	10140900	9876860	11394300	0.00518388	0.744276
sp|Q9Z0J0|NPC2_MOUSE	sp|Q9Z0J0|NPC2_MOUSE	>sp|Q9Z0J0|NPC2_MOUSE NPC intracellular cholesterol transporter 2 OS=Mus musculus OX=10090 GN=Npc2 PE=1 SV=1	2	15.4	16.442	7.4549	2	1	0	2	1	1	8384040	9058890	9308000	10739600	13337000	11794100	0.0193502	0.74576
sp|Q9Z1K5|ARI1_MOUSE	sp|Q9Z1K5|ARI1_MOUSE;tr|H7BWY7|H7BWY7_MOUSE;tr|H9KV21|H9KV21_MOUSE	>sp|Q9Z1K5|ARI1_MOUSE E3 ubiquitin-protein ligase ARIH1 OS=Mus musculus OX=10090 GN=Arih1 PE=1 SV=3;>tr|H7BWY7|H7BWY7_MOUSE RBR-type E3 ubiquitin transferase OS=Mus musculus OX=10090 GN=Arih1 PE=1 SV=1;>tr|H9KV21|H9KV21_MOUSE RBR-type E3 ubiquitin transfer	3	6.5	64.016	10.674	5	6	4	5	4	3	1145480	896915	955011	1332290	1439650	1246370	0.0220498	0.745937
tr|E9PZ00|E9PZ00_MOUSE	tr|E9PZ00|E9PZ00_MOUSE;tr|Q8BFQ1|Q8BFQ1_MOUSE;tr|K3W4L3|K3W4L3_MOUSE;tr|J3QPG5|J3QPG5_MOUSE;sp|Q61207|SAP_MOUSE	>tr|E9PZ00|E9PZ00_MOUSE Prosaposin OS=Mus musculus OX=10090 GN=Psap PE=1 SV=1;>tr|Q8BFQ1|Q8BFQ1_MOUSE Prosaposin OS=Mus musculus OX=10090 GN=Psap PE=1 SV=1;>tr|K3W4L3|K3W4L3_MOUSE Prosaposin OS=Mus musculus OX=10090 GN=Psap PE=1 SV=1;>tr|J3QPG5|J3QPG5_MOUS	3	5.6	60.672	8.0133	4	2	3	4	3	3	16088600	13685300	13739800	20696400	21126800	16492700	0.0423025	0.746172
sp|P51859|HDGF_MOUSE	sp|P51859|HDGF_MOUSE	>sp|P51859|HDGF_MOUSE Hepatoma-derived growth factor OS=Mus musculus OX=10090 GN=Hdgf PE=1 SV=2	7	59.1	26.268	156.43	13	16	15	21	17	17	94702300	86465500	103722000	130942000	132135000	118434000	0.00831754	0.746741
tr|A0A2I3BPN6|A0A2I3BPN6_MOUSE	tr|A0A2I3BPN6|A0A2I3BPN6_MOUSE;tr|E9QAP7|E9QAP7_MOUSE	>tr|A0A2I3BPN6|A0A2I3BPN6_MOUSE TATA-box-binding protein-associated factor 4 OS=Mus musculus OX=10090 GN=Taf4 PE=1 SV=1;>tr|E9QAP7|E9QAP7_MOUSE TATA-box-binding protein-associated factor 4 OS=Mus musculus OX=10090 GN=Taf4 PE=1 SV=1	3	3.7	104.16	9.3208	1	1	0	1	2	2	333047	306324	327360	445877	374970	472951	0.0228508	0.747204
sp|Q923D4|SF3B5_MOUSE	sp|Q923D4|SF3B5_MOUSE	>sp|Q923D4|SF3B5_MOUSE Splicing factor 3B subunit 5 OS=Mus musculus OX=10090 GN=Sf3b5 PE=1 SV=1	3	43	10.119	11.658	4	3	2	5	5	8	83018100	75738100	78210300	111830000	113269000	90424600	0.0271441	0.751026
sp|Q61249|IGBP1_MOUSE	sp|Q61249|IGBP1_MOUSE	>sp|Q61249|IGBP1_MOUSE Immunoglobulin-binding protein 1 OS=Mus musculus OX=10090 GN=Igbp1 PE=1 SV=1	7	28.5	38.97	29.799	5	4	7	10	8	4	4271600	4832610	3542840	5733850	5711180	5324450	0.0256442	0.754171
tr|A0A1B0GSX7|A0A1B0GSX7_MOUSE	tr|A0A1B0GSX7|A0A1B0GSX7_MOUSE;sp|Q6PFD9|NUP98_MOUSE;tr|B2RQL0|B2RQL0_MOUSE;tr|A0A140T8J8|A0A140T8J8_MOUSE	>tr|A0A1B0GSX7|A0A1B0GSX7_MOUSE Nuclear pore complex protein Nup98-Nup96 OS=Mus musculus OX=10090 GN=Nup98 PE=1 SV=1;>sp|Q6PFD9|NUP98_MOUSE Nuclear pore complex protein Nup98-Nup96 OS=Mus musculus OX=10090 GN=Nup98 PE=1 SV=2;>tr|B2RQL0|B2RQL0_MOUSE Nuclear	19	15.8	197.31	62.629	9	10	12	12	15	18	3218390	3162640	2997020	3966470	4288030	4001060	0.00140016	0.765208
sp|Q9DCX2|ATP5H_MOUSE	sp|Q9DCX2|ATP5H_MOUSE;tr|B1ASE2|B1ASE2_MOUSE	>sp|Q9DCX2|ATP5H_MOUSE ATP synthase subunit d, mitochondrial OS=Mus musculus OX=10090 GN=Atp5pd PE=1 SV=3;>tr|B1ASE2|B1ASE2_MOUSE ATP synthase, H+-transporting, mitochondrial F0 complex, subunit D (Fragment) OS=Mus musculus OX=10090 GN=Atp5h PE=1 SV=1	9	64	18.749	47.093	11	15	13	19	16	16	69342200	82588200	76482600	105130000	89299400	103883000	0.0215365	0.765684
sp|Q9DCW4|ETFB_MOUSE	sp|Q9DCW4|ETFB_MOUSE;tr|A0A0U1RNP5|A0A0U1RNP5_MOUSE;tr|A0A0N4SVE0|A0A0N4SVE0_MOUSE;tr|A0A0U1RQB4|A0A0U1RQB4_MOUSE;tr|A0A0U1RNR3|A0A0U1RNR3_MOUSE	>sp|Q9DCW4|ETFB_MOUSE Electron transfer flavoprotein subunit beta OS=Mus musculus OX=10090 GN=Etfb PE=1 SV=3;>tr|A0A0U1RNP5|A0A0U1RNP5_MOUSE Electron transfer flavoprotein subunit beta (Fragment) OS=Mus musculus OX=10090 GN=Etfb PE=4 SV=1;>tr|A0A0N4SVE0|A0	12	40	27.623	74.577	14	14	22	17	14	17	31687300	30780800	36119100	46362300	43390500	38803600	0.0220666	0.766879
sp|Q02819|NUCB1_MOUSE	sp|Q02819|NUCB1_MOUSE;tr|A0A1C7CYU3|A0A1C7CYU3_MOUSE;tr|A0A1B0GR41|A0A1B0GR41_MOUSE	>sp|Q02819|NUCB1_MOUSE Nucleobindin-1 OS=Mus musculus OX=10090 GN=Nucb1 PE=1 SV=2;>tr|A0A1C7CYU3|A0A1C7CYU3_MOUSE Nucleobindin 1, isoform CRA_b OS=Mus musculus OX=10090 GN=Nucb1 PE=1 SV=1;>tr|A0A1B0GR41|A0A1B0GR41_MOUSE Nucleobindin-1 (Fragment) OS=Mus mus	17	44.4	53.408	97.366	10	7	9	16	15	13	12797000	14330800	11219900	16403900	17785300	15707600	0.023906	0.76854
sp|Q61035|SYHC_MOUSE	sp|Q61035|SYHC_MOUSE	>sp|Q61035|SYHC_MOUSE Histidine--tRNA ligase, cytoplasmic OS=Mus musculus OX=10090 GN=Hars PE=1 SV=2	8	24.6	57.432	29.365	13	8	6	9	7	10	5687240	5780280	5988260	4520330	4233320	4621510	0.000746716	1.30509
sp|P21981|TGM2_MOUSE	sp|P21981|TGM2_MOUSE	>sp|P21981|TGM2_MOUSE Protein-glutamine gamma-glutamyltransferase 2 OS=Mus musculus OX=10090 GN=Tgm2 PE=1 SV=4	6	12.8	77.06	28.053	8	6	5	5	6	5	3295870	3660920	3715340	2591530	2936670	2605770	0.00815951	1.31204
sp|Q64378|FKBP5_MOUSE	sp|Q64378|FKBP5_MOUSE	>sp|Q64378|FKBP5_MOUSE Peptidyl-prolyl cis-trans isomerase FKBP5 OS=Mus musculus OX=10090 GN=Fkbp5 PE=1 SV=1	9	23.7	50.966	31.259	10	10	8	7	5	5	9395600	10611200	8620480	7534090	6880630	7318370	0.0196922	1.31722
sp|Q8CGF7|TCRG1_MOUSE	sp|Q8CGF7|TCRG1_MOUSE	>sp|Q8CGF7|TCRG1_MOUSE Transcription elongation regulator 1 OS=Mus musculus OX=10090 GN=Tcerg1 PE=1 SV=2	19	16.1	123.79	65.539	16	16	21	12	15	17	7808450	6983720	7855120	5233540	5761380	6012700	0.00670523	1.3316
sp|P26516|PSMD7_MOUSE	sp|P26516|PSMD7_MOUSE	>sp|P26516|PSMD7_MOUSE 26S proteasome non-ATPase regulatory subunit 7 OS=Mus musculus OX=10090 GN=Psmd7 PE=1 SV=2	7	32.4	36.539	25.473	4	3	5	5	4	3	10734700	13021500	11343800	9020570	9136190	8185870	0.0173809	1.33244
sp|P27659|RL3_MOUSE	sp|P27659|RL3_MOUSE;tr|A0A2R8VHN4|A0A2R8VHN4_MOUSE	>sp|P27659|RL3_MOUSE 60S ribosomal protein L3 OS=Mus musculus OX=10090 GN=Rpl3 PE=1 SV=3;>tr|A0A2R8VHN4|A0A2R8VHN4_MOUSE 60S ribosomal protein L3 (Fragment) OS=Mus musculus OX=10090 GN=Rpl3 PE=1 SV=1	6	16.4	46.109	32.542	8	9	8	9	8	4	16707300	15971400	18748400	14654100	10202700	12571800	0.0380993	1.37401
sp|Q2KHI9|MCM9_MOUSE	sp|Q2KHI9|MCM9_MOUSE	>sp|Q2KHI9|MCM9_MOUSE DNA helicase MCM9 OS=Mus musculus OX=10090 GN=Mcm9 PE=1 SV=2	1	0.6	125.81	2.7034	1	1	1	1	1	1	266831	288686	322182	170433	216831	250701	0.0476014	1.37578
sp|O35129|PHB2_MOUSE	sp|O35129|PHB2_MOUSE;tr|F6QPR1|F6QPR1_MOUSE	>sp|O35129|PHB2_MOUSE Prohibitin-2 OS=Mus musculus OX=10090 GN=Phb2 PE=1 SV=1;>tr|F6QPR1|F6QPR1_MOUSE Prohibitin-2 (Fragment) OS=Mus musculus OX=10090 GN=Phb2 PE=1 SV=1	12	46.5	33.296	71.02	11	15	12	12	13	11	14600100	16152000	15763700	11217700	11900000	10678500	0.00192465	1.37636
tr|Q3UJQ9|Q3UJQ9_MOUSE	tr|Q3UJQ9|Q3UJQ9_MOUSE;sp|Q9D0K2|SCOT1_MOUSE	>tr|Q3UJQ9|Q3UJQ9_MOUSE Succinyl-CoA:3-ketoacid-coenzyme A transferase OS=Mus musculus OX=10090 GN=Oxct1 PE=1 SV=1;>sp|Q9D0K2|SCOT1_MOUSE Succinyl-CoA:3-ketoacid coenzyme A transferase 1, mitochondrial OS=Mus musculus OX=10090 GN=Oxct1 PE=1 SV=1	6	19.5	52.278	19.78	4	5	4	7	1	3	6338540	5256680	6629120	4656520	3676530	4799710	0.036076	1.3877
sp|O35345|IMA7_MOUSE	sp|O35345|IMA7_MOUSE	>sp|O35345|IMA7_MOUSE Importin subunit alpha-7 OS=Mus musculus OX=10090 GN=Kpna6 PE=1 SV=2	1	2.4	59.964	4.9577	0	0	1	1	1	1	646771	NaN	779049	561854	471244	503784	0.0442792	1.3916
tr|E9PWW9|E9PWW9_MOUSE	tr|E9PWW9|E9PWW9_MOUSE	>tr|E9PWW9|E9PWW9_MOUSE Remodeling and spacing factor 1 OS=Mus musculus OX=10090 GN=Rsf1 PE=1 SV=2	6	5.6	161.75	17.476	6	3	4	4	2	3	733911	806301	793035	546642	565381	563699	0.000681918	1.39238
sp|P99026|PSB4_MOUSE	sp|P99026|PSB4_MOUSE	>sp|P99026|PSB4_MOUSE Proteasome subunit beta type-4 OS=Mus musculus OX=10090 GN=Psmb4 PE=1 SV=1	6	30.7	29.116	101.13	8	7	9	5	6	5	55584700	52394300	54524100	39846900	30151600	46501600	0.0338884	1.39488
sp|Q9Z1F9|SAE2_MOUSE	sp|Q9Z1F9|SAE2_MOUSE	>sp|Q9Z1F9|SAE2_MOUSE SUMO-activating enzyme subunit 2 OS=Mus musculus OX=10090 GN=Uba2 PE=1 SV=1	11	23.2	70.568	31.747	9	10	10	8	8	9	10744500	8707290	8974410	6403900	7231740	6391780	0.0159125	1.41936
sp|Q9CPU0|LGUL_MOUSE	sp|Q9CPU0|LGUL_MOUSE	>sp|Q9CPU0|LGUL_MOUSE Lactoylglutathione lyase OS=Mus musculus OX=10090 GN=Glo1 PE=1 SV=3	8	35.9	20.809	36.866	10	9	9	10	9	7	27129500	26199400	30103900	19973900	20739000	18031200	0.00448571	1.42028
sp|P28843|DPP4_MOUSE	sp|P28843|DPP4_MOUSE	>sp|P28843|DPP4_MOUSE Dipeptidyl peptidase 4 OS=Mus musculus OX=10090 GN=Dpp4 PE=1 SV=3	3	5	87.436	12.012	6	1	4	2	2	3	1626090	1493360	1753330	1156810	1340850	929833	0.0266081	1.42167
sp|Q8BMS1|ECHA_MOUSE	sp|Q8BMS1|ECHA_MOUSE	>sp|Q8BMS1|ECHA_MOUSE Trifunctional enzyme subunit alpha, mitochondrial OS=Mus musculus OX=10090 GN=Hadha PE=1 SV=1	10	16.6	82.669	33.783	12	14	14	14	12	11	5791850	7884910	6748660	5368040	4649760	4299630	0.0404906	1.42661
sp|P10126|EF1A1_MOUSE	sp|P10126|EF1A1_MOUSE;tr|D3Z3I8|D3Z3I8_MOUSE;tr|D3YZ68|D3YZ68_MOUSE	>sp|P10126|EF1A1_MOUSE Elongation factor 1-alpha 1 OS=Mus musculus OX=10090 GN=Eef1a1 PE=1 SV=3;>tr|D3Z3I8|D3Z3I8_MOUSE Elongation factor 1-alpha 1 (Fragment) OS=Mus musculus OX=10090 GN=Eef1a1 PE=1 SV=1;>tr|D3YZ68|D3YZ68_MOUSE Elongation factor 1-alpha 1	13	33.5	50.113	154.68	29	32	36	28	23	30	252068000	281887000	195545000	173095000	158462000	166553000	0.0397597	1.46454
sp|Q9JKF1|IQGA1_MOUSE	sp|Q9JKF1|IQGA1_MOUSE	>sp|Q9JKF1|IQGA1_MOUSE Ras GTPase-activating-like protein IQGAP1 OS=Mus musculus OX=10090 GN=Iqgap1 PE=1 SV=2	21	16.4	188.74	143.63	11	15	14	15	14	12	5461320	5189720	5102690	2720100	3472230	4535460	0.0356483	1.4685
sp|P62855|RS26_MOUSE	sp|P62855|RS26_MOUSE	>sp|P62855|RS26_MOUSE 40S ribosomal protein S26 OS=Mus musculus OX=10090 GN=Rps26 PE=1 SV=3	2	20.9	13.015	6.077	3	2	3	2	3	3	25730600	27698500	31524800	15811100	21630000	19958000	0.0193346	1.48006
sp|P10922|H10_MOUSE	sp|P10922|H10_MOUSE	>sp|P10922|H10_MOUSE Histone H1.0 OS=Mus musculus OX=10090 GN=H1f0 PE=2 SV=4	2	10.8	20.861	7.0852	4	4	3	2	2	2	12668500	14424000	12452400	8062210	10795800	7510320	0.0211317	1.49971
tr|E9Q6R3|E9Q6R3_MOUSE	tr|E9Q6R3|E9Q6R3_MOUSE;sp|O08547|SC22B_MOUSE	>tr|E9Q6R3|E9Q6R3_MOUSE Vesicle-trafficking protein SEC22b OS=Mus musculus OX=10090 GN=Sec22b PE=1 SV=1;>sp|O08547|SC22B_MOUSE Vesicle-trafficking protein SEC22b OS=Mus musculus OX=10090 GN=Sec22b PE=1 SV=3	3	21.7	18.922	15.366	1	2	3	2	3	3	3310250	3109140	3291950	2735640	1581740	2121950	0.0324958	1.50813
sp|P62897|CYC_MOUSE	sp|P62897|CYC_MOUSE	>sp|P62897|CYC_MOUSE Cytochrome c, somatic OS=Mus musculus OX=10090 GN=Cycs PE=1 SV=2	9	59	11.605	52.092	6	11	7	10	14	11	132658000	125348000	127069000	71722400	102218000	79777600	0.00955732	1.51773
sp|Q9D8E6|RL4_MOUSE	sp|Q9D8E6|RL4_MOUSE	>sp|Q9D8E6|RL4_MOUSE 60S ribosomal protein L4 OS=Mus musculus OX=10090 GN=Rpl4 PE=1 SV=3	13	30.3	47.153	40.346	5	10	11	3	6	7	16862000	19657600	19820600	13238700	10598200	13038800	0.00716728	1.52784
sp|Q9WU84|CCS_MOUSE	sp|Q9WU84|CCS_MOUSE	>sp|Q9WU84|CCS_MOUSE Copper chaperone for superoxide dismutase OS=Mus musculus OX=10090 GN=Ccs PE=1 SV=1	3	10.6	28.911	12.36	1	1	2	2	1	1	5524010	5015300	5378350	3757640	4359360	2228680	0.0464545	1.53858
sp|P62892|RL39_MOUSE	sp|P62892|RL39_MOUSE	>sp|P62892|RL39_MOUSE 60S ribosomal protein L39 OS=Mus musculus OX=10090 GN=Rpl39 PE=1 SV=2	1	19.6	6.4066	3.6908	4	1	2	1	1	1	62749000	47600100	68877400	35674100	36819500	43268200	0.0350615	1.54824
sp|P47962|RL5_MOUSE	sp|P47962|RL5_MOUSE	>sp|P47962|RL5_MOUSE 60S ribosomal protein L5 OS=Mus musculus OX=10090 GN=Rpl5 PE=1 SV=3	6	18.5	34.4	19.129	4	7	5	5	3	6	18339600	22032300	21305800	11174200	14948200	13450200	0.00945143	1.5586
sp|Q8JZN5|ACAD9_MOUSE	sp|Q8JZN5|ACAD9_MOUSE	>sp|Q8JZN5|ACAD9_MOUSE Acyl-CoA dehydrogenase family member 9, mitochondrial OS=Mus musculus OX=10090 GN=Acad9 PE=1 SV=2	6	10.9	68.721	15.694	3	3	2	2	3	3	1325460	1788690	1783390	1058680	772143	1043590	0.019847	1.58691
sp|P97351|RS3A_MOUSE	sp|P97351|RS3A_MOUSE	>sp|P97351|RS3A_MOUSE 40S ribosomal protein S3a OS=Mus musculus OX=10090 GN=Rps3a PE=1 SV=3	7	26.5	29.885	23.656	8	10	12	7	7	7	18775200	22448800	17874100	13314000	11027300	12416500	0.00860479	1.60777
sp|Q9CZ30|OLA1_MOUSE	sp|Q9CZ30|OLA1_MOUSE	>sp|Q9CZ30|OLA1_MOUSE Obg-like ATPase 1 OS=Mus musculus OX=10090 GN=Ola1 PE=1 SV=1	6	22.5	44.729	17.051	6	8	7	6	3	6	4969040	5385660	4841180	3114210	2285120	4013020	0.0213938	1.61446
tr|A0A0N4SVQ1|A0A0N4SVQ1_MOUSE	tr|A0A0N4SVQ1|A0A0N4SVQ1_MOUSE;sp|Q62425|NDUA4_MOUSE	>tr|A0A0N4SVQ1|A0A0N4SVQ1_MOUSE Cytochrome c oxidase subunit NDUFA4 OS=Mus musculus OX=10090 GN=Ndufa4 PE=1 SV=1;>sp|Q62425|NDUA4_MOUSE Cytochrome c oxidase subunit NDUFA4 OS=Mus musculus OX=10090 GN=Ndufa4 PE=1 SV=2	3	46.9	5.8765	13.655	2	2	2	2	0	2	31007500	24004200	25194900	18164700	19796000	11405800	0.0376139	1.62472
sp|P29351|PTN6_MOUSE	sp|P29351|PTN6_MOUSE	>sp|P29351|PTN6_MOUSE Tyrosine-protein phosphatase non-receptor type 6 OS=Mus musculus OX=10090 GN=Ptpn6 PE=1 SV=2	18	38.7	67.558	61.217	16	16	17	12	12	12	11859700	10387400	9444190	5477010	6098070	7872810	0.0153197	1.62955
sp|P30681|HMGB2_MOUSE	sp|P30681|HMGB2_MOUSE	>sp|P30681|HMGB2_MOUSE High mobility group protein B2 OS=Mus musculus OX=10090 GN=Hmgb2 PE=1 SV=3	12	43.8	24.162	117.97	23	29	28	16	21	23	578995000	700961000	753186000	332730000	469558000	443522000	0.016874	1.63198
tr|I7HLV2|I7HLV2_MOUSE	tr|I7HLV2|I7HLV2_MOUSE;sp|Q6ZWV3|RL10_MOUSE	>tr|I7HLV2|I7HLV2_MOUSE 60S ribosomal protein L10 (Fragment) OS=Mus musculus OX=10090 GN=Rpl10 PE=1 SV=1;>sp|Q6ZWV3|RL10_MOUSE 60S ribosomal protein L10 OS=Mus musculus OX=10090 GN=Rpl10 PE=1 SV=3	3	12.4	23.072	11.766	1	2	2	3	2	3	4869850	6556760	5495930	2832130	3040900	4348750	0.0308968	1.65554
sp|O08692|NGP_MOUSE	sp|O08692|NGP_MOUSE	>sp|O08692|NGP_MOUSE Neutrophilic granule protein OS=Mus musculus OX=10090 GN=Ngp PE=1 SV=1	3	22.2	19.331	15.212	4	4	4	3	3	3	9228710	10192300	9423610	4135130	6457960	6721010	0.0116534	1.66596
sp|Q60611|SATB1_MOUSE	sp|Q60611|SATB1_MOUSE;tr|E9PVB7|E9PVB7_MOUSE	>sp|Q60611|SATB1_MOUSE DNA-binding protein SATB1 OS=Mus musculus OX=10090 GN=Satb1 PE=1 SV=2;>tr|E9PVB7|E9PVB7_MOUSE DNA-binding protein SATB OS=Mus musculus OX=10090 GN=Satb1 PE=1 SV=1	7	13	85.879	28.736	4	7	5	6	4	4	4299290	4327990	3688990	2679820	1820200	2846620	0.0120901	1.67645
tr|A0A0R4J1B9|A0A0R4J1B9_MOUSE	tr|A0A0R4J1B9|A0A0R4J1B9_MOUSE;sp|Q9ER88|RT29_MOUSE;tr|G3X9M0|G3X9M0_MOUSE	>tr|A0A0R4J1B9|A0A0R4J1B9_MOUSE 28S ribosomal protein S29, mitochondrial OS=Mus musculus OX=10090 GN=Dap3 PE=1 SV=1;>sp|Q9ER88|RT29_MOUSE 28S ribosomal protein S29, mitochondrial OS=Mus musculus OX=10090 GN=Dap3 PE=1 SV=1;>tr|G3X9M0|G3X9M0_MOUSE 28S riboso	2	7.9	42.123	6.2194	1	1	1	3	2	3	396766	318795	398969	150886	226157	282301	0.0306013	1.69036
tr|F6TCF9|F6TCF9_MOUSE	tr|F6TCF9|F6TCF9_MOUSE;tr|A0A1L1SRT0|A0A1L1SRT0_MOUSE;sp|Q60739|BAG1_MOUSE	>tr|F6TCF9|F6TCF9_MOUSE BAG family molecular chaperone regulator 1 OS=Mus musculus OX=10090 GN=Bag1 PE=1 SV=1;>tr|A0A1L1SRT0|A0A1L1SRT0_MOUSE BAG family molecular chaperone regulator 1 OS=Mus musculus OX=10090 GN=Bag1 PE=1 SV=1;>sp|Q60739|BAG1_MOUSE BAG fa	3	9.3	39.696	23.361	2	2	2	3	3	2	2314700	2575760	2389070	1697800	1376290	1194520	0.00380641	1.70536
tr|F8WHG5|F8WHG5_MOUSE	tr|F8WHG5|F8WHG5_MOUSE;sp|Q60823|AKT2_MOUSE	>tr|F8WHG5|F8WHG5_MOUSE RAC-beta serine/threonine-protein kinase OS=Mus musculus OX=10090 GN=Akt2 PE=1 SV=1;>sp|Q60823|AKT2_MOUSE RAC-beta serine/threonine-protein kinase OS=Mus musculus OX=10090 GN=Akt2 PE=1 SV=1	2	6.8	51.056	2.7401	0	0	1	1	0	0	339031	268069	421764	208538	165445	228588	0.0419466	1.70746
sp|Q61179|IRF9_MOUSE	sp|Q61179|IRF9_MOUSE;tr|E9Q8M6|E9Q8M6_MOUSE;tr|E9PZJ2|E9PZJ2_MOUSE	>sp|Q61179|IRF9_MOUSE Interferon regulatory factor 9 OS=Mus musculus OX=10090 GN=Irf9 PE=1 SV=1;>tr|E9Q8M6|E9Q8M6_MOUSE Interferon regulatory factor 9 OS=Mus musculus OX=10090 GN=Irf9 PE=1 SV=1;>tr|E9PZJ2|E9PZJ2_MOUSE Interferon regulatory factor 9 OS=Mus	4	13.5	44.61	12.209	3	3	3	2	2	3	3304820	3372950	3681250	1426210	2170850	2445190	0.0115294	1.71443
tr|A0A1B0GRR3|A0A1B0GRR3_MOUSE	tr|A0A1B0GRR3|A0A1B0GRR3_MOUSE;sp|P62281|RS11_MOUSE;tr|A0A1B0GSE8|A0A1B0GSE8_MOUSE	>tr|A0A1B0GRR3|A0A1B0GRR3_MOUSE 40S ribosomal protein S11 OS=Mus musculus OX=10090 GN=Rps11 PE=1 SV=1;>sp|P62281|RS11_MOUSE 40S ribosomal protein S11 OS=Mus musculus OX=10090 GN=Rps11 PE=1 SV=3;>tr|A0A1B0GSE8|A0A1B0GSE8_MOUSE 40S ribosomal protein S11 (Fra	3	14.6	15.198	6.2463	2	3	3	2	2	2	5476780	6020620	6181220	3255150	3633470	3024400	0.000734228	1.78337
sp|Q64523|H2A2C_MOUSE	sp|Q64523|H2A2C_MOUSE;sp|Q6GSS7|H2A2A_MOUSE	>sp|Q64523|H2A2C_MOUSE Histone H2A type 2-C OS=Mus musculus OX=10090 GN=Hist2h2ac PE=1 SV=3;>sp|Q6GSS7|H2A2A_MOUSE Histone H2A type 2-A OS=Mus musculus OX=10090 GN=Hist2h2aa1 PE=1 SV=3	2	35.7	13.988	142.26	39	42	42	30	27	33	3005220000	3544840000	3538120000	2467020000	1651570000	1401380000	0.0144086	1.82758
sp|Q8K194|SNR27_MOUSE	sp|Q8K194|SNR27_MOUSE	>sp|Q8K194|SNR27_MOUSE U4/U6.U5 small nuclear ribonucleoprotein 27 kDa protein OS=Mus musculus OX=10090 GN=Snrnp27 PE=1 SV=1	2	17.4	18.885	4.1303	1	0	0	1	1	0	7439250	9454320	8329100	6083820	3984120	3699120	0.0159527	1.8321
tr|Q8C605|Q8C605_MOUSE	tr|Q8C605|Q8C605_MOUSE;sp|Q9WUA3|PFKAP_MOUSE	>tr|Q8C605|Q8C605_MOUSE ATP-dependent 6-phosphofructokinase OS=Mus musculus OX=10090 GN=Pfkp PE=1 SV=1;>sp|Q9WUA3|PFKAP_MOUSE ATP-dependent 6-phosphofructokinase, platelet type OS=Mus musculus OX=10090 GN=Pfkp PE=1 SV=1	7	12.9	85.546	30.689	11	10	9	5	8	4	5682220	4738610	3757540	2629440	3067670	1916780	0.0280034	1.86217
sp|O09044|SNP23_MOUSE	sp|O09044|SNP23_MOUSE;tr|Q9D3L3|Q9D3L3_MOUSE;tr|B0R029|B0R029_MOUSE;tr|E9Q8A1|E9Q8A1_MOUSE;tr|B0R030|B0R030_MOUSE	>sp|O09044|SNP23_MOUSE Synaptosomal-associated protein 23 OS=Mus musculus OX=10090 GN=Snap23 PE=1 SV=1;>tr|Q9D3L3|Q9D3L3_MOUSE Synaptosomal-associated protein OS=Mus musculus OX=10090 GN=Snap23 PE=1 SV=1;>tr|B0R029|B0R029_MOUSE Synaptosomal-associated prot	2	15.7	23.261	5.5733	1	0	2	1	0	2	1717810	1729220	1257460	644210	660130	1186550	0.0354931	1.88868
sp|Q9QZQ8|H2AY_MOUSE	sp|Q9QZQ8|H2AY_MOUSE	>sp|Q9QZQ8|H2AY_MOUSE Core histone macro-H2A.1 OS=Mus musculus OX=10090 GN=H2afy PE=1 SV=3	10	38.4	39.735	51.595	15	15	17	14	14	11	22858100	31515900	33543400	17204600	14304200	13976000	0.0146173	1.9329
sp|Q9CPT5|NOP16_MOUSE	sp|Q9CPT5|NOP16_MOUSE;tr|D3Z7M5|D3Z7M5_MOUSE	>sp|Q9CPT5|NOP16_MOUSE Nucleolar protein 16 OS=Mus musculus OX=10090 GN=Nop16 PE=1 SV=1;>tr|D3Z7M5|D3Z7M5_MOUSE Nucleolar protein 16 OS=Mus musculus OX=10090 GN=Nop16 PE=1 SV=1	2	14	21.139	8.7983	1	0	0	1	0	1	1395550	1627860	NaN	848443	839796	654983	0.00866365	1.93542
sp|P14115|RL27A_MOUSE	sp|P14115|RL27A_MOUSE	>sp|P14115|RL27A_MOUSE 60S ribosomal protein L27a OS=Mus musculus OX=10090 GN=Rpl27a PE=1 SV=5	2	8.8	16.605	9.3585	2	3	3	3	3	4	9753540	9928790	9952530	3909860	5133370	6110840	0.00165329	1.95557
sp|Q6A068|CDC5L_MOUSE	sp|Q6A068|CDC5L_MOUSE;tr|A0A1W2P7Z8|A0A1W2P7Z8_MOUSE;tr|A0A1W2P7H4|A0A1W2P7H4_MOUSE;tr|A0A1W2P855|A0A1W2P855_MOUSE;tr|A0A1W2P6Q8|A0A1W2P6Q8_MOUSE;tr|A0A1W2P7S8|A0A1W2P7S8_MOUSE	>sp|Q6A068|CDC5L_MOUSE Cell division cycle 5-like protein OS=Mus musculus OX=10090 GN=Cdc5l PE=1 SV=2;>tr|A0A1W2P7Z8|A0A1W2P7Z8_MOUSE Predicted gene 9045 OS=Mus musculus OX=10090 GN=Gm9045 PE=4 SV=1;>tr|A0A1W2P7H4|A0A1W2P7H4_MOUSE Predicted gene 9048 OS=Mu	10	18	92.188	25.518	5	8	7	3	3	2	1483620	1917790	2059930	431813	1125330	1209740	0.0407028	1.97382
sp|P47911|RL6_MOUSE	sp|P47911|RL6_MOUSE	>sp|P47911|RL6_MOUSE 60S ribosomal protein L6 OS=Mus musculus OX=10090 GN=Rpl6 PE=1 SV=3	3	9.5	33.509	7.0892	1	3	3	2	3	3	5386010	4691550	5764380	2675260	1780720	3553870	0.0121864	1.97781
sp|P14131|RS16_MOUSE	sp|P14131|RS16_MOUSE	>sp|P14131|RS16_MOUSE 40S ribosomal protein S16 OS=Mus musculus OX=10090 GN=Rps16 PE=1 SV=4	6	37	16.445	17.36	10	8	7	5	3	6	9693570	11214700	11298500	7366130	3228110	5609700	0.0151055	1.98759
sp|Q9Z2D6|MECP2_MOUSE	sp|Q9Z2D6|MECP2_MOUSE	>sp|Q9Z2D6|MECP2_MOUSE Methyl-CpG-binding protein 2 OS=Mus musculus OX=10090 GN=Mecp2 PE=1 SV=1	10	25.8	52.307	32.28	8	8	10	6	5	4	8676730	9668900	13239100	5078340	5899770	4838340	0.0209105	1.99695
sp|Q3SXD3|HDDC2_MOUSE	sp|Q3SXD3|HDDC2_MOUSE;tr|E0CYK6|E0CYK6_MOUSE	>sp|Q3SXD3|HDDC2_MOUSE HD domain-containing protein 2 OS=Mus musculus OX=10090 GN=Hddc2 PE=1 SV=1;>tr|E0CYK6|E0CYK6_MOUSE HD domain-containing protein 2 (Fragment) OS=Mus musculus OX=10090 GN=Hddc2 PE=1 SV=2	4	23.1	22.753	10.668	4	4	4	4	1	2	10186000	7483030	7210460	5804420	2692440	3867250	0.0336549	2.01223
sp|Q64339|ISG15_MOUSE	sp|Q64339|ISG15_MOUSE	>sp|Q64339|ISG15_MOUSE Ubiquitin-like protein ISG15 OS=Mus musculus OX=10090 GN=Isg15 PE=1 SV=4	1	5.6	17.897	2.9844	1	1	1	1	0	0	10118300	15007300	9446290	5434450	6160510	5395610	0.0296274	2.03477
tr|F8WJ41|F8WJ41_MOUSE	tr|F8WJ41|F8WJ41_MOUSE;sp|P62245|RS15A_MOUSE	>tr|F8WJ41|F8WJ41_MOUSE 40S ribosomal protein S15a (Fragment) OS=Mus musculus OX=10090 GN=Rps15a PE=1 SV=1;>sp|P62245|RS15A_MOUSE 40S ribosomal protein S15a OS=Mus musculus OX=10090 GN=Rps15a PE=1 SV=2	3	25.9	12.31	7.9559	1	4	3	0	0	0	3727490	4121010	5150140	NaN	2022990	2171170	0.026889	2.06615
tr|A0A3B2WDD2|A0A3B2WDD2_MOUSE	tr|A0A3B2WDD2|A0A3B2WDD2_MOUSE;tr|A0A3B2WBL1|A0A3B2WBL1_MOUSE;tr|Q5XJF6|Q5XJF6_MOUSE;sp|P53026|RL10A_MOUSE;tr|A0A3B2W820|A0A3B2W820_MOUSE;tr|A0A3B2W824|A0A3B2W824_MOUSE	>tr|A0A3B2WDD2|A0A3B2WDD2_MOUSE Ribosomal protein OS=Mus musculus OX=10090 GN=Rpl10a PE=1 SV=1;>tr|A0A3B2WBL1|A0A3B2WBL1_MOUSE Ribosomal protein OS=Mus musculus OX=10090 GN=Rpl10a PE=1 SV=1;>tr|Q5XJF6|Q5XJF6_MOUSE Ribosomal protein OS=Mus musculus OX=10090	5	22.6	21.636	10.386	4	1	4	0	1	2	8461250	5338600	8948320	3012960	3626430	4214520	0.028519	2.09585
tr|Q6ZWZ7|Q6ZWZ7_MOUSE	tr|Q6ZWZ7|Q6ZWZ7_MOUSE;sp|Q9CPR4|RL17_MOUSE	>tr|Q6ZWZ7|Q6ZWZ7_MOUSE 60S ribosomal protein L17 OS=Mus musculus OX=10090 GN=Rpl17 PE=1 SV=1;>sp|Q9CPR4|RL17_MOUSE 60S ribosomal protein L17 OS=Mus musculus OX=10090 GN=Rpl17 PE=1 SV=3	3	18.5	21.397	8.1094	4	3	3	1	3	0	12494000	15139600	11127500	5790760	5462670	7158740	0.00621222	2.10519
sp|Q62167|DDX3X_MOUSE	sp|Q62167|DDX3X_MOUSE;sp|P16381|DDX3L_MOUSE	>sp|Q62167|DDX3X_MOUSE ATP-dependent RNA helicase DDX3X OS=Mus musculus OX=10090 GN=Ddx3x PE=1 SV=3;>sp|P16381|DDX3L_MOUSE Putative ATP-dependent RNA helicase Pl10 OS=Mus musculus OX=10090 GN=D1Pas1 PE=1 SV=1	2	16	73.101	22.983	4	3	2	1	2	4	2301950	2898140	2746260	1147210	1450730	1170390	0.00239605	2.10872
sp|Q9D6T0|NOSIP_MOUSE	sp|Q9D6T0|NOSIP_MOUSE;tr|A0A1B0GT07|A0A1B0GT07_MOUSE;tr|A0A1B0GS48|A0A1B0GS48_MOUSE	>sp|Q9D6T0|NOSIP_MOUSE Nitric oxide synthase-interacting protein OS=Mus musculus OX=10090 GN=Nosip PE=1 SV=1;>tr|A0A1B0GT07|A0A1B0GT07_MOUSE Nitric oxide synthase-interacting protein (Fragment) OS=Mus musculus OX=10090 GN=Nosip PE=1 SV=1;>tr|A0A1B0GS48|A0A	4	19.3	33.209	9.6176	3	2	2	0	3	1	2453790	2195400	2511100	324149	1676040	1393820	0.041238	2.10969
tr|B7ZCN0|B7ZCN0_MOUSE	tr|B7ZCN0|B7ZCN0_MOUSE;tr|B7ZCM9|B7ZCM9_MOUSE;tr|D6RGQ7|D6RGQ7_MOUSE;tr|E0CXG8|E0CXG8_MOUSE;sp|P0C872|JMJD7_MOUSE;sp|P0C871|PA24B_MOUSE;tr|B7ZCM8|B7ZCM8_MOUSE	>tr|B7ZCN0|B7ZCN0_MOUSE Phospholipase A2 OS=Mus musculus OX=10090 GN=Gm28042 PE=4 SV=1;>tr|B7ZCM9|B7ZCM9_MOUSE Phospholipase A2 OS=Mus musculus OX=10090 GN=Gm28042 PE=4 SV=1;>tr|D6RGQ7|D6RGQ7_MOUSE Bifunctional peptidase and (3S)-lysyl hydroxylase Jmjd7 OS	2	2.1	100.51	3.7043	2	0	0	0	0	0	767141	NaN	652714	NaN	380949	289406	0.0361654	2.11806
sp|P62751|RL23A_MOUSE	sp|P62751|RL23A_MOUSE;tr|D3YTY6|D3YTY6_MOUSE	>sp|P62751|RL23A_MOUSE 60S ribosomal protein L23a OS=Mus musculus OX=10090 GN=Rpl23a PE=1 SV=1;>tr|D3YTY6|D3YTY6_MOUSE Predicted gene 6096 OS=Mus musculus OX=10090 GN=Gm6096 PE=1 SV=1	4	21.2	17.695	11.726	2	4	4	2	2	2	22434700	27600800	35476800	13544600	13690100	12182400	0.0158651	2.16942
sp|P62082|RS7_MOUSE	sp|P62082|RS7_MOUSE;tr|F6SVV1|F6SVV1_MOUSE	>sp|P62082|RS7_MOUSE 40S ribosomal protein S7 OS=Mus musculus OX=10090 GN=Rps7 PE=2 SV=1;>tr|F6SVV1|F6SVV1_MOUSE 40S ribosomal protein S7 OS=Mus musculus OX=10090 GN=Gm9493 PE=3 SV=1	8	36.6	22.127	18.085	3	6	7	4	6	3	20825400	23907600	36635600	12047100	14311100	10881100	0.0408939	2.18502
tr|A0A1L1SQA8|A0A1L1SQA8_MOUSE	tr|A0A1L1SQA8|A0A1L1SQA8_MOUSE;sp|P62852|RS25_MOUSE	>tr|A0A1L1SQA8|A0A1L1SQA8_MOUSE 40S ribosomal protein S25 OS=Mus musculus OX=10090 GN=Rps25 PE=1 SV=1;>sp|P62852|RS25_MOUSE 40S ribosomal protein S25 OS=Mus musculus OX=10090 GN=Rps25 PE=1 SV=1	2	20.4	10.309	7.0587	2	0	3	0	1	1	12218300	16353400	17206900	8886570	5051190	6927230	0.0118984	2.19404
tr|A0A0N4SV66|A0A0N4SV66_MOUSE	tr|A0A0N4SV66|A0A0N4SV66_MOUSE;sp|Q8CGP6|H2A1H_MOUSE;tr|Q8CGP4|Q8CGP4_MOUSE;sp|Q8R1M2|H2AJ_MOUSE;sp|Q8CGP7|H2A1K_MOUSE;sp|Q8CGP5|H2A1F_MOUSE;sp|Q8BFU2|H2A3_MOUSE;sp|C0HKE9|H2A1P_MOUSE;sp|C0HKE8|H2A1O_MOUSE;sp|C0HKE7|H2A1N_MOUSE;sp|C0HKE6|H2A1I_MOUSE;sp|C0HKE5|H2A1G_MOUSE;sp|C0HKE4|H2A1E_MOUSE;sp|C0HKE3|H2A1D_MOUSE;sp|C0HKE2|H2A1C_MOUSE;sp|C0HKE1|H2A1B_MOUSE;sp|P27661|H2AX_MOUSE	>tr|A0A0N4SV66|A0A0N4SV66_MOUSE Histone H2A OS=Mus musculus OX=10090 GN=H2afj PE=1 SV=1;>sp|Q8CGP6|H2A1H_MOUSE Histone H2A type 1-H OS=Mus musculus OX=10090 GN=Hist1h2ah PE=1 SV=3;>tr|Q8CGP4|Q8CGP4_MOUSE Histone H2A OS=Mus musculus OX=10090 GN=Hist1h2aa PE	1	36.5	13.66	77.7	6	7	6	6	5	5	216789000	226420000	382702000	104784000	115791000	143391000	0.0487864	2.2692
sp|P61358|RL27_MOUSE	sp|P61358|RL27_MOUSE	>sp|P61358|RL27_MOUSE 60S ribosomal protein L27 OS=Mus musculus OX=10090 GN=Rpl27 PE=1 SV=2	6	45.6	15.798	42.036	6	12	10	7	4	4	38095800	36888800	31402900	14192900	19281200	12835200	0.00214523	2.29732
sp|Q9QYB1|CLIC4_MOUSE	sp|Q9QYB1|CLIC4_MOUSE	>sp|Q9QYB1|CLIC4_MOUSE Chloride intracellular channel protein 4 OS=Mus musculus OX=10090 GN=Clic4 PE=1 SV=3	2	11.9	28.729	11.24	3	3	3	3	2	4	1766800	2093350	2777590	947388	457254	1439370	0.0370963	2.33394
sp|Q9WVK4|EHD1_MOUSE	sp|Q9WVK4|EHD1_MOUSE	>sp|Q9WVK4|EHD1_MOUSE EH domain-containing protein 1 OS=Mus musculus OX=10090 GN=Ehd1 PE=1 SV=1	3	5.1	60.602	7.8473	2	2	2	2	1	0	417404	NaN	398458	170928	131858	213392	0.00480141	2.37087
tr|Q3TJ22|Q3TJ22_MOUSE	tr|Q3TJ22|Q3TJ22_MOUSE;tr|J3QN89|J3QN89_MOUSE	>tr|Q3TJ22|Q3TJ22_MOUSE Angio-associated migratory protein OS=Mus musculus OX=10090 GN=Aamp PE=1 SV=1;>tr|J3QN89|J3QN89_MOUSE Angio-associated migratory protein OS=Mus musculus OX=10090 GN=Aamp PE=1 SV=1	3	9.9	46.894	7.2501	1	2	2	0	1	0	2391780	3272280	3655040	1151160	1468280	1194630	0.00902115	2.44335
tr|Q3USX5|Q3USX5_MOUSE	tr|Q3USX5|Q3USX5_MOUSE;sp|Q8R4K2|IRAK4_MOUSE	>tr|Q3USX5|Q3USX5_MOUSE Interleukin-1 receptor-associated kinase 4 OS=Mus musculus OX=10090 GN=Irak4 PE=1 SV=1;>sp|Q8R4K2|IRAK4_MOUSE Interleukin-1 receptor-associated kinase 4 OS=Mus musculus OX=10090 GN=Irak4 PE=1 SV=1	4	9.7	50.157	10.739	4	5	2	2	1	1	788729	793692	861000	186110	301054	474304	0.0047366	2.54134
sp|Q9ERS5|PKHA2_MOUSE	sp|Q9ERS5|PKHA2_MOUSE;tr|F8WIK5|F8WIK5_MOUSE	>sp|Q9ERS5|PKHA2_MOUSE Pleckstrin homology domain-containing family A member 2 OS=Mus musculus OX=10090 GN=Plekha2 PE=1 SV=1;>tr|F8WIK5|F8WIK5_MOUSE Pleckstrin homology domain-containing family A member 2 (Fragment) OS=Mus musculus OX=10090 GN=Plekha2 PE=1	2	6.1	47.379	3.5745	0	0	1	0	1	1	859707	899746	832058	281729	317559	410936	0.000259838	2.56528
tr|H3BJU7|H3BJU7_MOUSE	tr|H3BJU7|H3BJU7_MOUSE;tr|H3BJX8|H3BJX8_MOUSE;tr|H3BJ45|H3BJ45_MOUSE;tr|H3BJ40|H3BJ40_MOUSE;tr|H3BKH9|H3BKH9_MOUSE;sp|Q60875|ARHG2_MOUSE	>tr|H3BJU7|H3BJU7_MOUSE Rho guanine nucleotide exchange factor 2 OS=Mus musculus OX=10090 GN=Arhgef2 PE=1 SV=1;>tr|H3BJX8|H3BJX8_MOUSE Rho guanine nucleotide exchange factor 2 OS=Mus musculus OX=10090 GN=Arhgef2 PE=1 SV=1;>tr|H3BJ45|H3BJ45_MOUSE Rho guanin	2	3.2	108.59	6.3381	2	0	0	0	0	1	211741	192975	142917	46497.9	85759.3	80549	0.00958567	2.57339
tr|V9GXE4|V9GXE4_MOUSE	tr|V9GXE4|V9GXE4_MOUSE;sp|Q80US4|ARP5_MOUSE;tr|A0A0A0MQ89|A0A0A0MQ89_MOUSE	>tr|V9GXE4|V9GXE4_MOUSE Actin-related protein 5 OS=Mus musculus OX=10090 GN=Actr5 PE=1 SV=1;>sp|Q80US4|ARP5_MOUSE Actin-related protein 5 OS=Mus musculus OX=10090 GN=Actr5 PE=1 SV=3;>tr|A0A0A0MQ89|A0A0A0MQ89_MOUSE Actin-related protein 5 OS=Mus musculus OX	1	4.5	45.23	4.8003	3	2	3	1	3	3	1578460	1430890	1514110	NaN	606460	561118	0.000528875	2.58282
tr|D3YZA1|D3YZA1_MOUSE	tr|D3YZA1|D3YZA1_MOUSE;tr|D3Z7T7|D3Z7T7_MOUSE;tr|E9PW20|E9PW20_MOUSE;sp|Q9CY57|CHTOP_MOUSE	>tr|D3YZA1|D3YZA1_MOUSE Chromatin target of PRMT1 protein (Fragment) OS=Mus musculus OX=10090 GN=Chtop PE=1 SV=8;>tr|D3Z7T7|D3Z7T7_MOUSE Chromatin target of PRMT1 protein (Fragment) OS=Mus musculus OX=10090 GN=Chtop PE=1 SV=1;>tr|E9PW20|E9PW20_MOUSE Chroma	2	23.6	13.447	7.0399	3	2	1	1	0	3	6242340	5580780	6495020	2505420	1997250	2522020	0.000307679	2.60768
tr|D3Z7D5|D3Z7D5_MOUSE	tr|D3Z7D5|D3Z7D5_MOUSE;sp|Q02788|CO6A2_MOUSE	>tr|D3Z7D5|D3Z7D5_MOUSE Collagen alpha-2(VI) chain OS=Mus musculus OX=10090 GN=Col6a2 PE=1 SV=1;>sp|Q02788|CO6A2_MOUSE Collagen alpha-2(VI) chain OS=Mus musculus OX=10090 GN=Col6a2 PE=1 SV=3	3	3.9	98.987	8.4127	2	3	3	0	1	0	489984	493960	885407	246356	311084	155586	0.0498585	2.62172
sp|P47963|RL13_MOUSE	sp|P47963|RL13_MOUSE	>sp|P47963|RL13_MOUSE 60S ribosomal protein L13 OS=Mus musculus OX=10090 GN=Rpl13 PE=1 SV=3	4	20.4	24.305	33.705	5	6	5	3	3	3	18209400	14776000	20933500	7612670	6554210	6354630	0.00364457	2.62743
tr|Q9CQM8|Q9CQM8_MOUSE	tr|Q9CQM8|Q9CQM8_MOUSE;sp|O09167|RL21_MOUSE	>tr|Q9CQM8|Q9CQM8_MOUSE 60S ribosomal protein L21 OS=Mus musculus OX=10090 GN=Rpl21 PE=1 SV=1;>sp|O09167|RL21_MOUSE 60S ribosomal protein L21 OS=Mus musculus OX=10090 GN=Rpl21 PE=1 SV=3	3	21.2	18.579	8.2086	3	4	2	2	1	1	10029800	14411300	12287400	4435910	7329960	2167600	0.0178177	2.63599
tr|A2A547|A2A547_MOUSE	tr|A2A547|A2A547_MOUSE;sp|P84099|RL19_MOUSE	>tr|A2A547|A2A547_MOUSE Ribosomal protein L19 OS=Mus musculus OX=10090 GN=Rpl19 PE=1 SV=1;>sp|P84099|RL19_MOUSE 60S ribosomal protein L19 OS=Mus musculus OX=10090 GN=Rpl19 PE=1 SV=1	2	9.3	23.247	5.4801	2	2	2	0	1	0	13088100	9821570	12417500	3403510	4807420	4676930	0.00237858	2.74112
tr|Z4YKB8|Z4YKB8_MOUSE	tr|Z4YKB8|Z4YKB8_MOUSE;sp|Q3TEA8|HP1B3_MOUSE;tr|Z4YKA3|Z4YKA3_MOUSE;tr|A2AM70|A2AM70_MOUSE;tr|A2AM62|A2AM62_MOUSE;tr|A2AM63|A2AM63_MOUSE	>tr|Z4YKB8|Z4YKB8_MOUSE Heterochromatin protein 1-binding protein 3 OS=Mus musculus OX=10090 GN=Hp1bp3 PE=1 SV=1;>sp|Q3TEA8|HP1B3_MOUSE Heterochromatin protein 1-binding protein 3 OS=Mus musculus OX=10090 GN=Hp1bp3 PE=1 SV=1;>tr|Z4YKA3|Z4YKA3_MOUSE Heteroc	4	8.8	60.85	15.154	8	4	6	1	1	0	5249640	4941330	5587030	1589120	2220830	NaN	0.00215209	2.76084
sp|Q04857|CO6A1_MOUSE	sp|Q04857|CO6A1_MOUSE	>sp|Q04857|CO6A1_MOUSE Collagen alpha-1(VI) chain OS=Mus musculus OX=10090 GN=Col6a1 PE=1 SV=1	4	4.2	108.49	8.3913	1	2	4	0	1	1	1424450	788479	779704	357147	292224	402162	0.0400307	2.84597
sp|O35744|CHIL3_MOUSE	sp|O35744|CHIL3_MOUSE	>sp|O35744|CHIL3_MOUSE Chitinase-like protein 3 OS=Mus musculus OX=10090 GN=Chil3 PE=1 SV=2	9	26.9	44.458	25.604	10	10	12	6	3	3	9847170	7361190	9224500	3435380	2829910	2975920	0.00173065	2.86032
sp|Q9WTK5|NFKB2_MOUSE	sp|Q9WTK5|NFKB2_MOUSE	>sp|Q9WTK5|NFKB2_MOUSE Nuclear factor NF-kappa-B p100 subunit OS=Mus musculus OX=10090 GN=Nfkb2 PE=1 SV=1	6	9.5	96.831	12.671	2	5	5	2	2	0	922654	2036400	1901840	449153	752180	466632	0.0432346	2.91427
sp|Q07797|LG3BP_MOUSE	sp|Q07797|LG3BP_MOUSE	>sp|Q07797|LG3BP_MOUSE Galectin-3-binding protein OS=Mus musculus OX=10090 GN=Lgals3bp PE=1 SV=1	4	9.5	64.49	15.444	5	4	5	3	2	1	2215520	1792040	2006970	711662	79495.5	1216880	0.0190234	2.99523
sp|P31725|S10A9_MOUSE	sp|P31725|S10A9_MOUSE	>sp|P31725|S10A9_MOUSE Protein S100-A9 OS=Mus musculus OX=10090 GN=S100a9 PE=1 SV=3	2	23	13.049	27.752	6	7	8	4	3	3	75374800	62358800	46070800	18040000	24532900	17349000	0.00928737	3.0674
tr|B1ARA3|B1ARA3_MOUSE	tr|B1ARA3|B1ARA3_MOUSE;tr|B1ARA5|B1ARA5_MOUSE;sp|P61255|RL26_MOUSE	>tr|B1ARA3|B1ARA3_MOUSE 60S ribosomal protein L26 (Fragment) OS=Mus musculus OX=10090 GN=Rpl26 PE=1 SV=1;>tr|B1ARA5|B1ARA5_MOUSE 60S ribosomal protein L26 OS=Mus musculus OX=10090 GN=Rpl26 PE=1 SV=1;>sp|P61255|RL26_MOUSE 60S ribosomal protein L26 OS=Mus mu	2	15.5	12.217	5.0418	3	2	1	1	3	3	10005100	8698430	9409850	2325980	3798410	2730760	0.000377075	3.17481
sp|Q9CPQ8|ATP5L_MOUSE	sp|Q9CPQ8|ATP5L_MOUSE	>sp|Q9CPQ8|ATP5L_MOUSE ATP synthase subunit g, mitochondrial OS=Mus musculus OX=10090 GN=Atp5mg PE=1 SV=1	2	33	11.424	6.4313	0	3	1	0	1	0	8900610	15966800	9673980	1976410	4752140	4032120	0.0293627	3.20997
sp|P43274|H14_MOUSE	sp|P43274|H14_MOUSE	>sp|P43274|H14_MOUSE Histone H1.4 OS=Mus musculus OX=10090 GN=Hist1h1e PE=1 SV=2	5	32.4	21.977	180.94	21	22	24	17	14	15	813628000	817553000	927156000	197512000	319245000	271753000	0.000328222	3.24452
tr|A0A0R4J2B2|A0A0R4J2B2_MOUSE	tr|A0A0R4J2B2|A0A0R4J2B2_MOUSE;sp|Q6WVG3|KCD12_MOUSE	>tr|A0A0R4J2B2|A0A0R4J2B2_MOUSE BTB/POZ domain-containing protein KCTD12 OS=Mus musculus OX=10090 GN=Kctd12 PE=1 SV=1;>sp|Q6WVG3|KCD12_MOUSE BTB/POZ domain-containing protein KCTD12 OS=Mus musculus OX=10090 GN=Kctd12 PE=1 SV=1	6	33.9	35.888	23.431	6	6	9	3	3	3	4066440	3033200	5400110	983533	1571810	1292230	0.0150251	3.24874
tr|Q921R2|Q921R2_MOUSE	tr|Q921R2|Q921R2_MOUSE;sp|P62301|RS13_MOUSE;tr|A0A0U1RQ71|A0A0U1RQ71_MOUSE	>tr|Q921R2|Q921R2_MOUSE 40S ribosomal protein S13 OS=Mus musculus OX=10090 GN=Rps13 PE=1 SV=1;>sp|P62301|RS13_MOUSE 40S ribosomal protein S13 OS=Mus musculus OX=10090 GN=Rps13 PE=1 SV=2;>tr|A0A0U1RQ71|A0A0U1RQ71_MOUSE 40S ribosomal protein S13 OS=Mus muscu	5	30.7	16.142	18.41	3	5	6	1	4	2	20396700	18988000	19139000	3981320	6856500	5695240	0.000121968	3.5398
sp|P43276|H15_MOUSE	sp|P43276|H15_MOUSE	>sp|P43276|H15_MOUSE Histone H1.5 OS=Mus musculus OX=10090 GN=Hist1h1b PE=1 SV=2	8	29.6	22.576	81.5	13	15	17	8	9	12	219693000	248798000	311853000	65604800	77228600	73739900	0.00237155	3.60314
sp|Q6ZWN5|RS9_MOUSE	sp|Q6ZWN5|RS9_MOUSE;tr|F7CJS8|F7CJS8_MOUSE;tr|D3YWH9|D3YWH9_MOUSE;tr|Q9CXW7|Q9CXW7_MOUSE	>sp|Q6ZWN5|RS9_MOUSE 40S ribosomal protein S9 OS=Mus musculus OX=10090 GN=Rps9 PE=1 SV=3;>tr|F7CJS8|F7CJS8_MOUSE 40S ribosomal protein S9 (Fragment) OS=Mus musculus OX=10090 GN=Rps9 PE=1 SV=1;>tr|D3YWH9|D3YWH9_MOUSE 40S ribosomal protein S9 OS=Mus musculus	5	20.6	22.591	15.789	4	3	8	1	2	2	9270360	6620270	7749070	2022030	2314320	1850660	0.0017238	3.82086
sp|Q8BP67|RL24_MOUSE	sp|Q8BP67|RL24_MOUSE	>sp|Q8BP67|RL24_MOUSE 60S ribosomal protein L24 OS=Mus musculus OX=10090 GN=Rpl24 PE=1 SV=2	1	8.3	17.779	4.5363	2	2	3	1	1	1	2003030	2461860	2640740	605621	905113	328352	0.0022517	3.86367
sp|P17710|HXK1_MOUSE	sp|P17710|HXK1_MOUSE	>sp|P17710|HXK1_MOUSE Hexokinase-1, EC 2.7.1.1 (Hexokinase type I, HK I) (Hexokinase, tumor isozyme)	1	30.3	22.099	28.722	11	13	11	9	7	9	3866300000	4516790000	5145680000	89646500	108918000	139655000	0.0010416	4
sp|P43275|H11_MOUSE	sp|P43275|H11_MOUSE	>sp|P43275|H11_MOUSE Histone H1.1 OS=Mus musculus OX=10090 GN=Hist1h1a PE=1 SV=2	7	37.1	21.785	112.67	13	16	16	8	6	9	73746500	90855900	132771000	22097900	25807100	23961800	0.0128555	4.13784
sp|P62754|RS6_MOUSE	sp|P62754|RS6_MOUSE	>sp|P62754|RS6_MOUSE 40S ribosomal protein S6 OS=Mus musculus OX=10090 GN=Rps6 PE=1 SV=1	6	25.3	28.68	26.72	3	3	2	1	1	2	9006720	17564800	16847700	3860670	4064680	2065280	0.0166735	4.34599
sp|Q9JIK5|DDX21_MOUSE	sp|Q9JIK5|DDX21_MOUSE	>sp|Q9JIK5|DDX21_MOUSE Nucleolar RNA helicase 2 OS=Mus musculus OX=10090 GN=Ddx21 PE=1 SV=3	6	10	93.55	20.678	3	2	3	1	2	4	808594	1698380	1182890	191890	327405	289217	0.0212246	4.56377
sp|Q80U78|PUM1_MOUSE	sp|Q80U78|PUM1_MOUSE;tr|E9Q6M7|E9Q6M7_MOUSE;tr|Q3TTW5|Q3TTW5_MOUSE;tr|A8WHM8|A8WHM8_MOUSE	>sp|Q80U78|PUM1_MOUSE Pumilio homolog 1 OS=Mus musculus OX=10090 GN=Pum1 PE=1 SV=2;>tr|E9Q6M7|E9Q6M7_MOUSE Pumilio homolog 1 OS=Mus musculus OX=10090 GN=Pum1 PE=1 SV=1;>tr|Q3TTW5|Q3TTW5_MOUSE Pumilio homolog 1 OS=Mus musculus OX=10090 GN=Pum1 PE=1 SV=1;>tr	3	4.2	126.62	7.6433	1	1	3	1	1	1	1265430	1018570	1267000	172680	241947	362566	0.000744995	4.56901
sp|P12970|RL7A_MOUSE	sp|P12970|RL7A_MOUSE	>sp|P12970|RL7A_MOUSE 60S ribosomal protein L7a OS=Mus musculus OX=10090 GN=Rpl7a PE=1 SV=2	4	18.8	29.976	8.8368	3	5	1	0	0	1	3928450	4903940	4484520	1314770	81004	1503600	0.00276698	4.59303
sp|P15864|H12_MOUSE	sp|P15864|H12_MOUSE	>sp|P15864|H12_MOUSE Histone H1.2 OS=Mus musculus OX=10090 GN=Hist1h1c PE=1 SV=2	2	27.8	21.266	9.8455	5	4	5	2	1	2	121347000	132930000	183407000	203830000	206120000	285445000	0.00418691	4.88817
tr|E9Q740|E9Q740_MOUSE	tr|E9Q740|E9Q740_MOUSE;tr|F8VQC1|F8VQC1_MOUSE	>tr|E9Q740|E9Q740_MOUSE Signal recognition particle subunit SRP72 OS=Mus musculus OX=10090 GN=Srp72 PE=1 SV=1;>tr|F8VQC1|F8VQC1_MOUSE Signal recognition particle subunit SRP72 OS=Mus musculus OX=10090 GN=Srp72 PE=1 SV=1	6	14.6	67.928	20.778	4	3	5	5	3	2	47368800	48290400	52782000	12377700	16245600	1692190	0.00107677	4.89655
tr|F8WI35|F8WI35_MOUSE	tr|F8WI35|F8WI35_MOUSE;sp|P84244|H33_MOUSE;sp|P84228|H32_MOUSE;sp|P68433|H31_MOUSE;sp|P02301|H3C_MOUSE;tr|A0A1W2P768|A0A1W2P768_MOUSE;tr|E0CZ27|E0CZ27_MOUSE	>tr|F8WI35|F8WI35_MOUSE Histone H3 OS=Mus musculus OX=10090 GN=H3f3a PE=1 SV=1;>sp|P84244|H33_MOUSE Histone H3.3 OS=Mus musculus OX=10090 GN=H3f3a PE=1 SV=2;>sp|P84228|H32_MOUSE Histone H3.2 OS=Mus musculus OX=10090 GN=Hist1h3b PE=1 SV=2;>sp|P68433|H31_MOU	8	36.3	15.199	64.281	12	19	24	12	13	10	3674030000	4862970000	3696460000	597238000	989659000	760698000	0.00128613	5.21106
sp|Q64282|IFIT1_MOUSE	sp|Q64282|IFIT1_MOUSE	>sp|Q64282|IFIT1_MOUSE Interferon-induced protein with tetratricopeptide repeats 1 OS=Mus musculus OX=10090 GN=Ifit1 PE=1 SV=2	8	22.5	53.737	26.216	7	5	6	0	0	0	1823110	2266050	2279350	635263	209109	229491	0.000987248	5.93047
sp|Q8K0E8|FIBB_MOUSE	sp|Q8K0E8|FIBB_MOUSE	>sp|Q8K0E8|FIBB_MOUSE Fibrinogen beta chain OS=Mus musculus OX=10090 GN=Fgb PE=1 SV=1	3	10.8	54.752	8.5536	1	1	3	0	0	0	1525270	920524	893914	146135	232124	148922	0.0107771	6.33503
sp|P62830|RL23_MOUSE	sp|P62830|RL23_MOUSE	>sp|P62830|RL23_MOUSE 60S ribosomal protein L23 OS=Mus musculus OX=10090 GN=Rpl23 PE=1 SV=1	3	27.1	14.865	10.214	0	1	2	1	0	1	2871570	4201900	4636960	NaN	485521	457029	0.0153423	8.2828
tr|E9PV48|E9PV48_MOUSE	tr|E9PV48|E9PV48_MOUSE;sp|Q64345|IFIT3_MOUSE	>tr|E9PV48|E9PV48_MOUSE Interferon-induced protein with tetratricopeptide repeats 3B OS=Mus musculus OX=10090 GN=Ifit3b PE=1 SV=1;>sp|Q64345|IFIT3_MOUSE Interferon-induced protein with tetratricopeptide repeats 3 OS=Mus musculus OX=10090 GN=Ifit3 PE=1 SV=1	3	10.2	47.219	8.8588	2	4	4	0	0	0	1055720	1233230	1092580	155557	97713.6	NaN	0.000842896	8.90097
tr|F6ZQA3|F6ZQA3_MOUSE	tr|F6ZQA3|F6ZQA3_MOUSE	>tr|F6ZQA3|F6ZQA3_MOUSE Nuclear mitotic apparatus protein 1 (Fragment) OS=Mus musculus OX=10090 GN=Numa1 PE=1 SV=1	2	36.7	82.882	4.1869	1	0	1	0	0	1	716854	NaN	794582	40621.8	NaN	104445	0.00537427	10.4189
sp|E9PV24|FIBA_MOUSE	sp|E9PV24|FIBA_MOUSE	>sp|E9PV24|FIBA_MOUSE Fibrinogen alpha chain OS=Mus musculus OX=10090 GN=Fga PE=1 SV=1	5	8.5	87.428	17.583	4	3	2	0	0	0	2736970	2646520	1729730	171373	219128	204251	0.00251557	11.96
tr|A8DUK4|A8DUK4_MOUSE	tr|A8DUK4|A8DUK4_MOUSE;tr|E9Q223|E9Q223_MOUSE;sp|P02088|HBB1_MOUSE	>tr|A8DUK4|A8DUK4_MOUSE Beta-globin OS=Mus musculus OX=10090 GN=Hbb-bs PE=1 SV=1;>tr|E9Q223|E9Q223_MOUSE Hemoglobin, beta adult s chain (Fragment) OS=Mus musculus OX=10090 GN=Hbb-bs PE=1 SV=1;>sp|P02088|HBB1_MOUSE Hemoglobin subunit beta-1 OS=Mus musculus	9	63.9	15.748	64.624	11	16	17	2	3	1	82630100	202570000	110204000	7574770	7645410	15334000	0.0287071	12.9411
tr|J3QQ16|J3QQ16_MOUSE	tr|J3QQ16|J3QQ16_MOUSE;tr|A0A087WS16|A0A087WS16_MOUSE;tr|E9PWQ3|E9PWQ3_MOUSE;tr|D3YWD1|D3YWD1_MOUSE	>tr|J3QQ16|J3QQ16_MOUSE Collagen, type VI, alpha 3 OS=Mus musculus OX=10090 GN=Col6a3 PE=1 SV=1;>tr|A0A087WS16|A0A087WS16_MOUSE Collagen, type VI, alpha 3 OS=Mus musculus OX=10090 GN=Col6a3 PE=1 SV=1;>tr|E9PWQ3|E9PWQ3_MOUSE Collagen, type VI, alpha 3 OS=Mu	5	2.4	288.69	12.948	4	3	4	0	1	0	190737	177995	141606	13178.4	8542.12	16656.4	0.000456023	13.298
sp|P05366|SAA1_MOUSE	sp|P05366|SAA1_MOUSE	>sp|P05366|SAA1_MOUSE Serum amyloid A-1 protein OS=Mus musculus OX=10090 GN=Saa1 PE=1 SV=2	1	7.4	13.77	2.6257	2	1	1	0	0	0	1232000	1276800	1643600	0	0	0
sp|P14901|HMOX1_MOUSE	sp|P14901|HMOX1_MOUSE	>sp|P14901|HMOX1_MOUSE Heme oxygenase 1 OS=Mus musculus OX=10090 GN=Hmox1 PE=1 SV=1	3	12.5	32.928	9.1616	2	4	3	0	0	0	967620	3561100	2587000	0	0	0
sp|Q00623|APOA1_MOUSE	sp|Q00623|APOA1_MOUSE	>sp|Q00623|APOA1_MOUSE Apolipoprotein A-I OS=Mus musculus OX=10090 GN=Apoa1 PE=1 SV=2	1	4.9	30.615	3.359	1	1	1	0	0	0	1251500	1599700	1185500	0	0	0
sp|Q6ZWV7|RL35_MOUSE	sp|Q6ZWV7|RL35_MOUSE	>sp|Q6ZWV7|RL35_MOUSE 60S ribosomal protein L35 OS=Mus musculus OX=10090 GN=Rpl35 PE=1 SV=1	2	18.7	14.552	3.0968	0	2	0	0	0	0	3028600	4320100	2781500	0	0	0
sp|Q8BY71|HAT1_MOUSE	sp|Q8BY71|HAT1_MOUSE;tr|A2ATU9|A2ATU9_MOUSE	>sp|Q8BY71|HAT1_MOUSE Histone acetyltransferase type B catalytic subunit OS=Mus musculus OX=10090 GN=Hat1 PE=1 SV=1;>tr|A2ATU9|A2ATU9_MOUSE Histone acetyltransferase type B catalytic subunit OS=Mus musculus OX=10090 GN=Hat1 PE=1 SV=1	1	3.1	49.278	2.6589	1	0	0	0	0	0	397930	512070	497480	0	0	0
tr|A0A0R4J0M9|A0A0R4J0M9_MOUSE	tr|A0A0R4J0M9|A0A0R4J0M9_MOUSE;sp|Q8CDG3|VCIP1_MOUSE	>tr|A0A0R4J0M9|A0A0R4J0M9_MOUSE Deubiquitinating protein VCIP135 OS=Mus musculus OX=10090 GN=Vcpip1 PE=1 SV=1;>sp|Q8CDG3|VCIP1_MOUSE Deubiquitinating protein VCIP135 OS=Mus musculus OX=10090 GN=Vcpip1 PE=1 SV=1	2	1.8	134.44	4.1836	2	4	0	0	0	1	152970	197050	103700	0	0	0
tr|F8VPT3|F8VPT3_MOUSE	tr|F8VPT3|F8VPT3_MOUSE	>tr|F8VPT3|F8VPT3_MOUSE Lactase OS=Mus musculus OX=10090 GN=Lct PE=1 SV=1	2	2.4	217.8	3.0123	1	1	0	0	0	0	246780	160740	148180	0	0	0
tr|G3X8T9|G3X8T9_MOUSE	tr|G3X8T9|G3X8T9_MOUSE	>tr|G3X8T9|G3X8T9_MOUSE Serine (Or cysteine) peptidase inhibitor, clade A, member 3N, isoform CRA_a OS=Mus musculus OX=10090 GN=Serpina3n PE=1 SV=1	1	7.2	46.766	2.6806	0	1	1	0	0	0	262560	282960	285540	0	0	0
tr|A0A0G2JGG2|A0A0G2JGG2_MOUSE	tr|A0A0G2JGG2|A0A0G2JGG2_MOUSE;tr|A0A0G2JF31|A0A0G2JF31_MOUSE;tr|D6RCW9|D6RCW9_MOUSE;tr|A0A0G2JF03|A0A0G2JF03_MOUSE;sp|P07607|TYSY_MOUSE	>tr|A0A0G2JGG2|A0A0G2JGG2_MOUSE Thymidylate synthase OS=Mus musculus OX=10090 GN=Tyms PE=1 SV=1;>tr|A0A0G2JF31|A0A0G2JF31_MOUSE Thymidylate synthase (Fragment) OS=Mus musculus OX=10090 GN=Tyms PE=1 SV=1;>tr|D6RCW9|D6RCW9_MOUSE Thymidylate synthase OS=Mus m	1	22.6	10.827	7.6955	0	0	0	1	1	1	0	0	0	2172700	1011700	1786600
sp|P40237|CD82_MOUSE	sp|P40237|CD82_MOUSE;tr|A2AIJ2|A2AIJ2_MOUSE;tr|A2AIJ1|A2AIJ1_MOUSE	>sp|P40237|CD82_MOUSE CD82 antigen OS=Mus musculus OX=10090 GN=Cd82 PE=1 SV=1;>tr|A2AIJ2|A2AIJ2_MOUSE CD82 antigen (Fragment) OS=Mus musculus OX=10090 GN=Cd82 PE=1 SV=1;>tr|A2AIJ1|A2AIJ1_MOUSE Tetraspanin (Fragment) OS=Mus musculus OX=10090 GN=Cd82 PE=1 SV	2	8.3	29.628	3.2971	0	0	0	1	1	0	0	0	0	1286800	1763200	190170
sp|P52624|UPP1_MOUSE	sp|P52624|UPP1_MOUSE	>sp|P52624|UPP1_MOUSE Uridine phosphorylase 1 OS=Mus musculus OX=10090 GN=Upp1 PE=1 SV=2	1	7.1	34.086	4.9331	0	0	0	1	1	0	0	0	0	1178700	1272000	485410
sp|Q3THJ3|EIF1A_MOUSE	sp|Q3THJ3|EIF1A_MOUSE	>sp|Q3THJ3|EIF1A_MOUSE Probable RNA-binding protein EIF1AD OS=Mus musculus OX=10090 GN=Eif1ad PE=1 SV=2	2	14.1	19.52	3.9577	0	0	1	3	1	0	0	0	0	1534200	1175300	1432300
sp|Q3UFK8|FRMD8_MOUSE	sp|Q3UFK8|FRMD8_MOUSE	>sp|Q3UFK8|FRMD8_MOUSE FERM domain-containing protein 8 OS=Mus musculus OX=10090 GN=Frmd8 PE=1 SV=2	4	10.7	51.827	11.075	0	0	0	2	3	2	0	0	0	368320	725590	777490
tr|E9PZ64|E9PZ64_MOUSE	tr|E9PZ64|E9PZ64_MOUSE;tr|A0A087WSU4|A0A087WSU4_MOUSE;sp|Q61122|NAB1_MOUSE	>tr|E9PZ64|E9PZ64_MOUSE NGFI-A-binding protein 1 OS=Mus musculus OX=10090 GN=Nab1 PE=1 SV=1;>tr|A0A087WSU4|A0A087WSU4_MOUSE NGFI-A-binding protein 1 OS=Mus musculus OX=10090 GN=Nab1 PE=1 SV=1;>sp|Q61122|NAB1_MOUSE NGFI-A-binding protein 1 OS=Mus musculus O	1	3.3	50.774	3.8506	0	2	3	2	1	4	0	0	0	781960	756220	685090
tr|A2AGL5|A2AGL5_MOUSE	tr|A2AGL5|A2AGL5_MOUSE;sp|Q9D9K3|AVEN_MOUSE	>tr|A2AGL5|A2AGL5_MOUSE Apoptosis, caspase activation inhibitor, isoform CRA_c OS=Mus musculus OX=10090 GN=Aven PE=1 SV=1;>sp|Q9D9K3|AVEN_MOUSE Cell death regulator Aven OS=Mus musculus OX=10090 GN=Aven PE=1 SV=2	2	11.1	24.072	3.8201	0	1	0	0	0	0	0	0	0	472160	500880	469570
sp|Q9Z0L8|GGH_MOUSE	sp|Q9Z0L8|GGH_MOUSE	>sp|Q9Z0L8|GGH_MOUSE Gamma-glutamyl hydrolase OS=Mus musculus OX=10090 GN=Ggh PE=1 SV=2	1	5.7	35.469	5.2303	0	0	0	1	0	1	0	0	0	840800	367330	564470
